# Supplementary material for: Deep transfer learning in clear cell renal cell carcinoma multi-omics unveils a novel tyrosine kinase inhibitor-tolerant cell subgroup for precision therapy
Source: Research Square preprint supplement (doi:10.21203/rs.3.rs-7796004/v1), 2025-10-22
Supplement: Supplementary file 1 [file 5f7a43f3c1968c9cde7a22c0.docx]

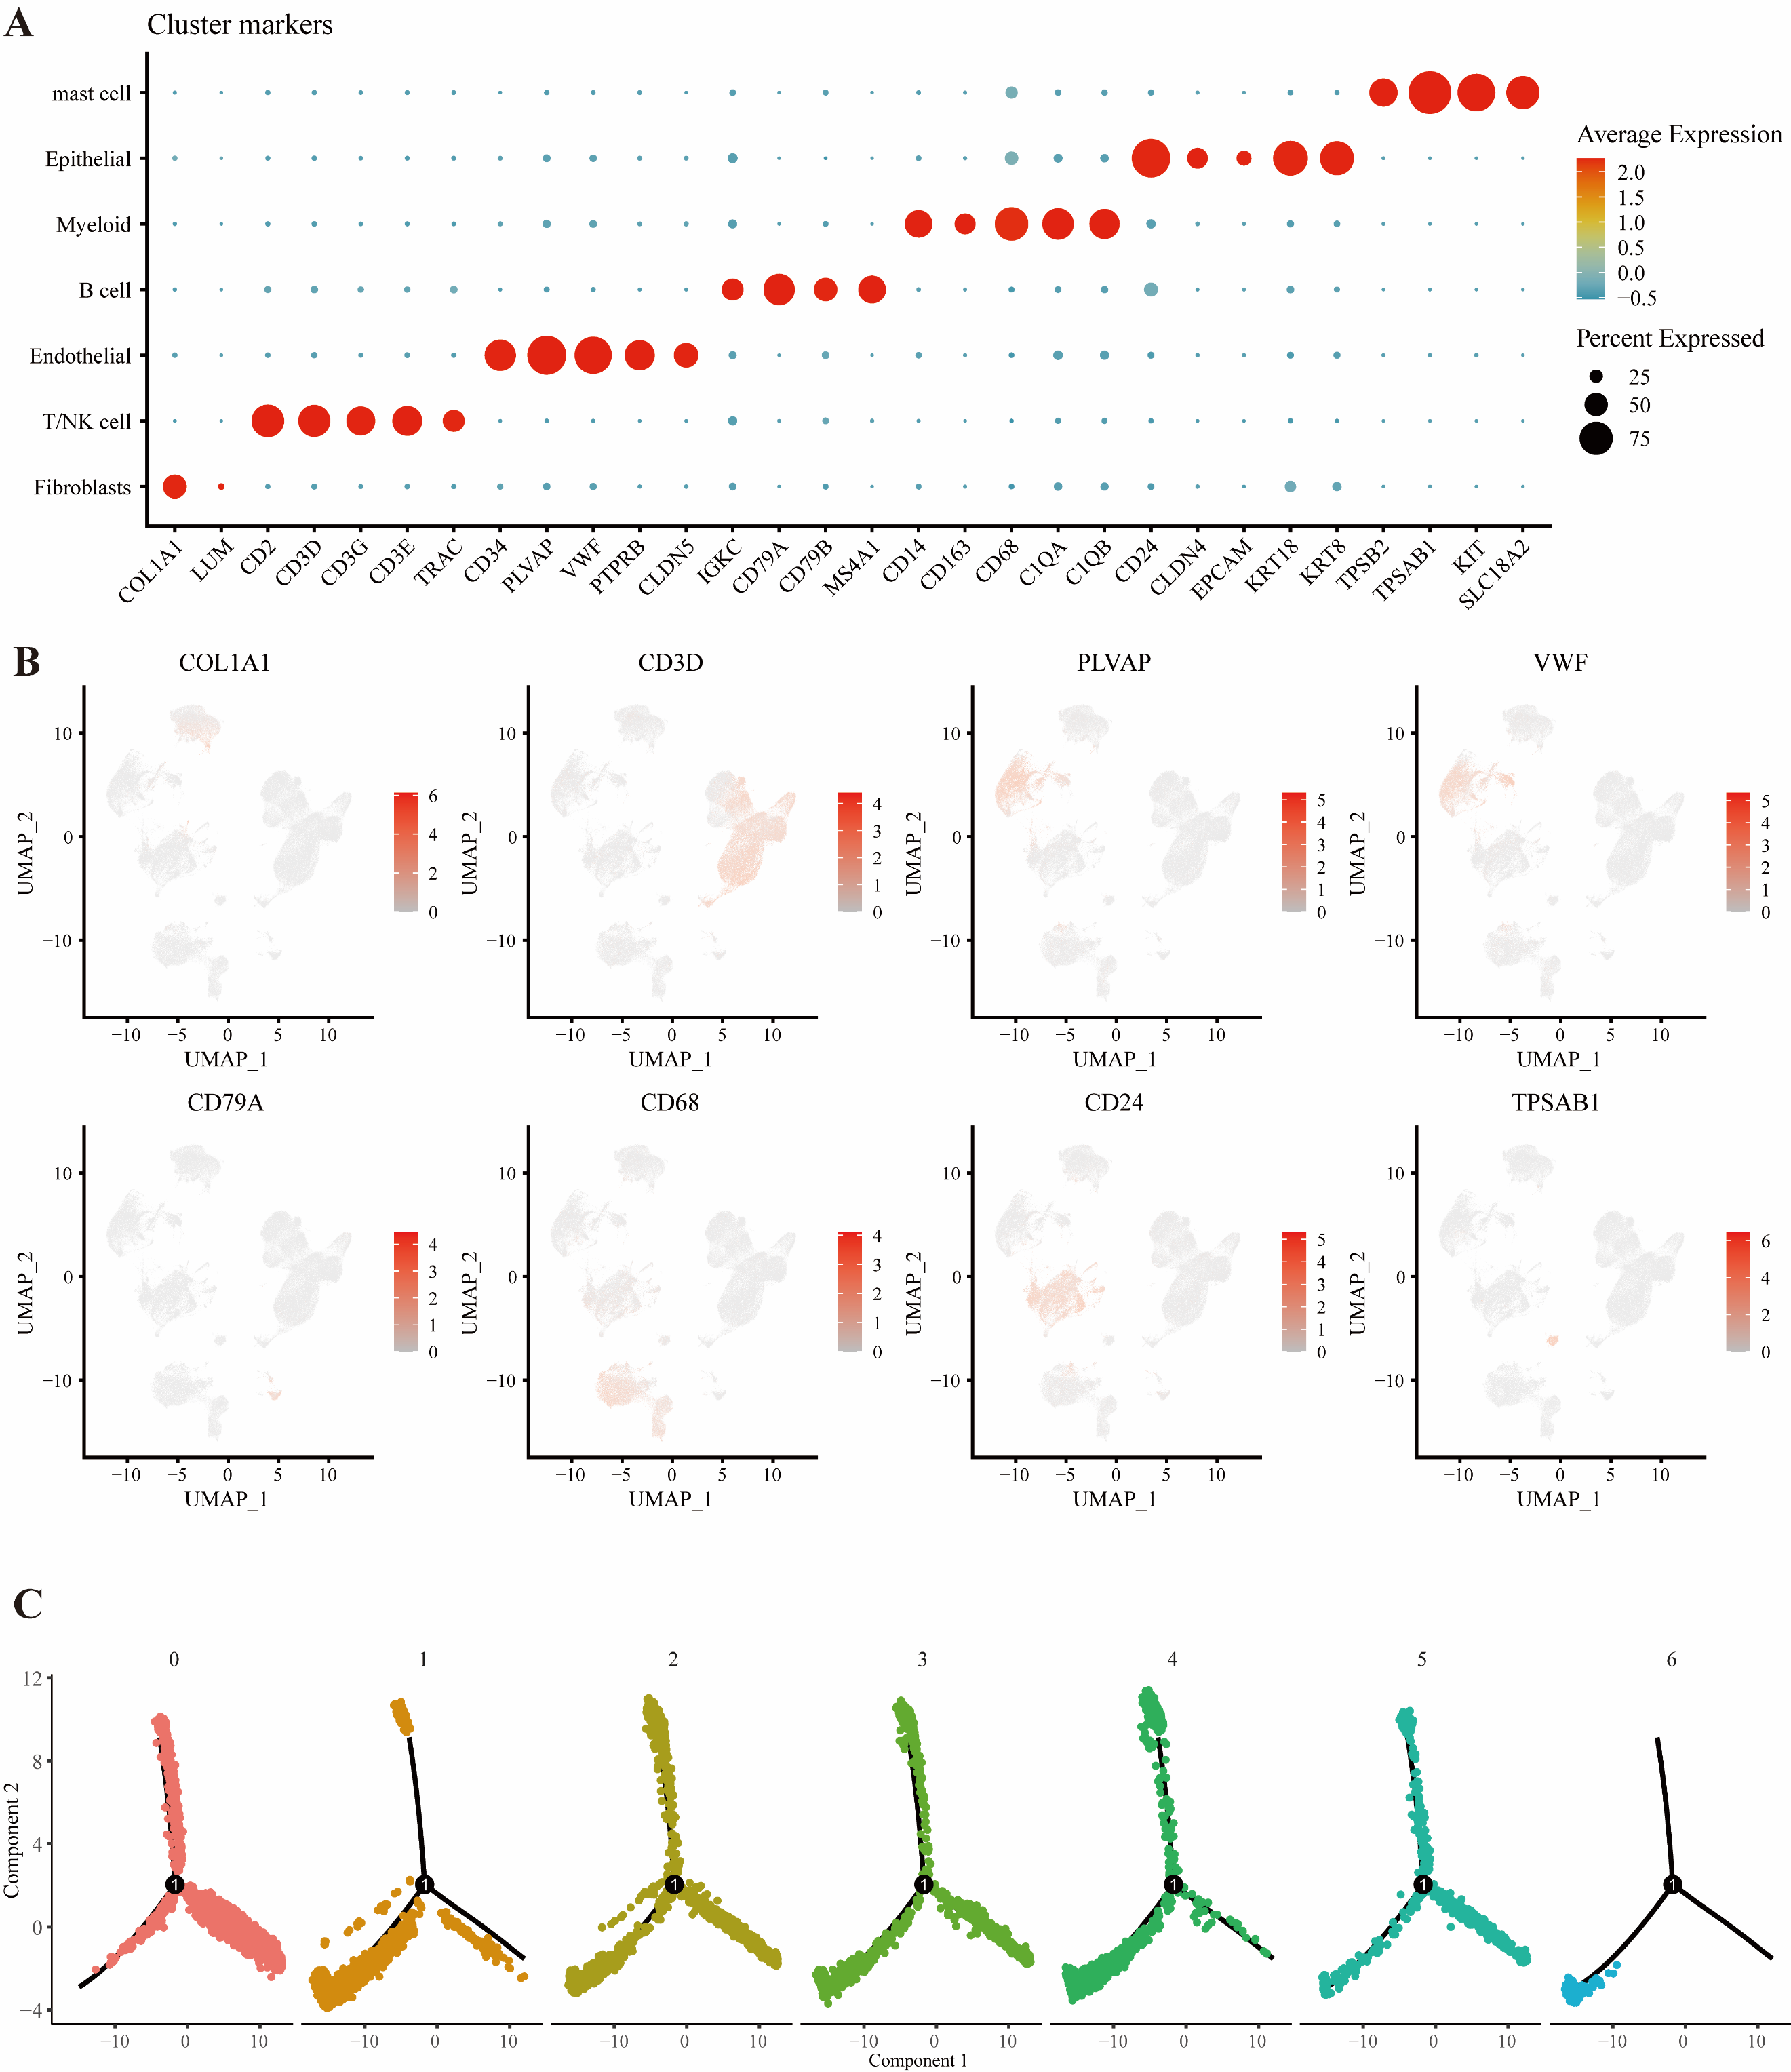


**Figure S1. Supplement to single-cell annotation details and pseudo-time analysis. (A)** The markers of different cell types. **(B)** The distribution of markers in UMAP reduction. **(C)** Distribution of different clusters in pseudo-time analysis


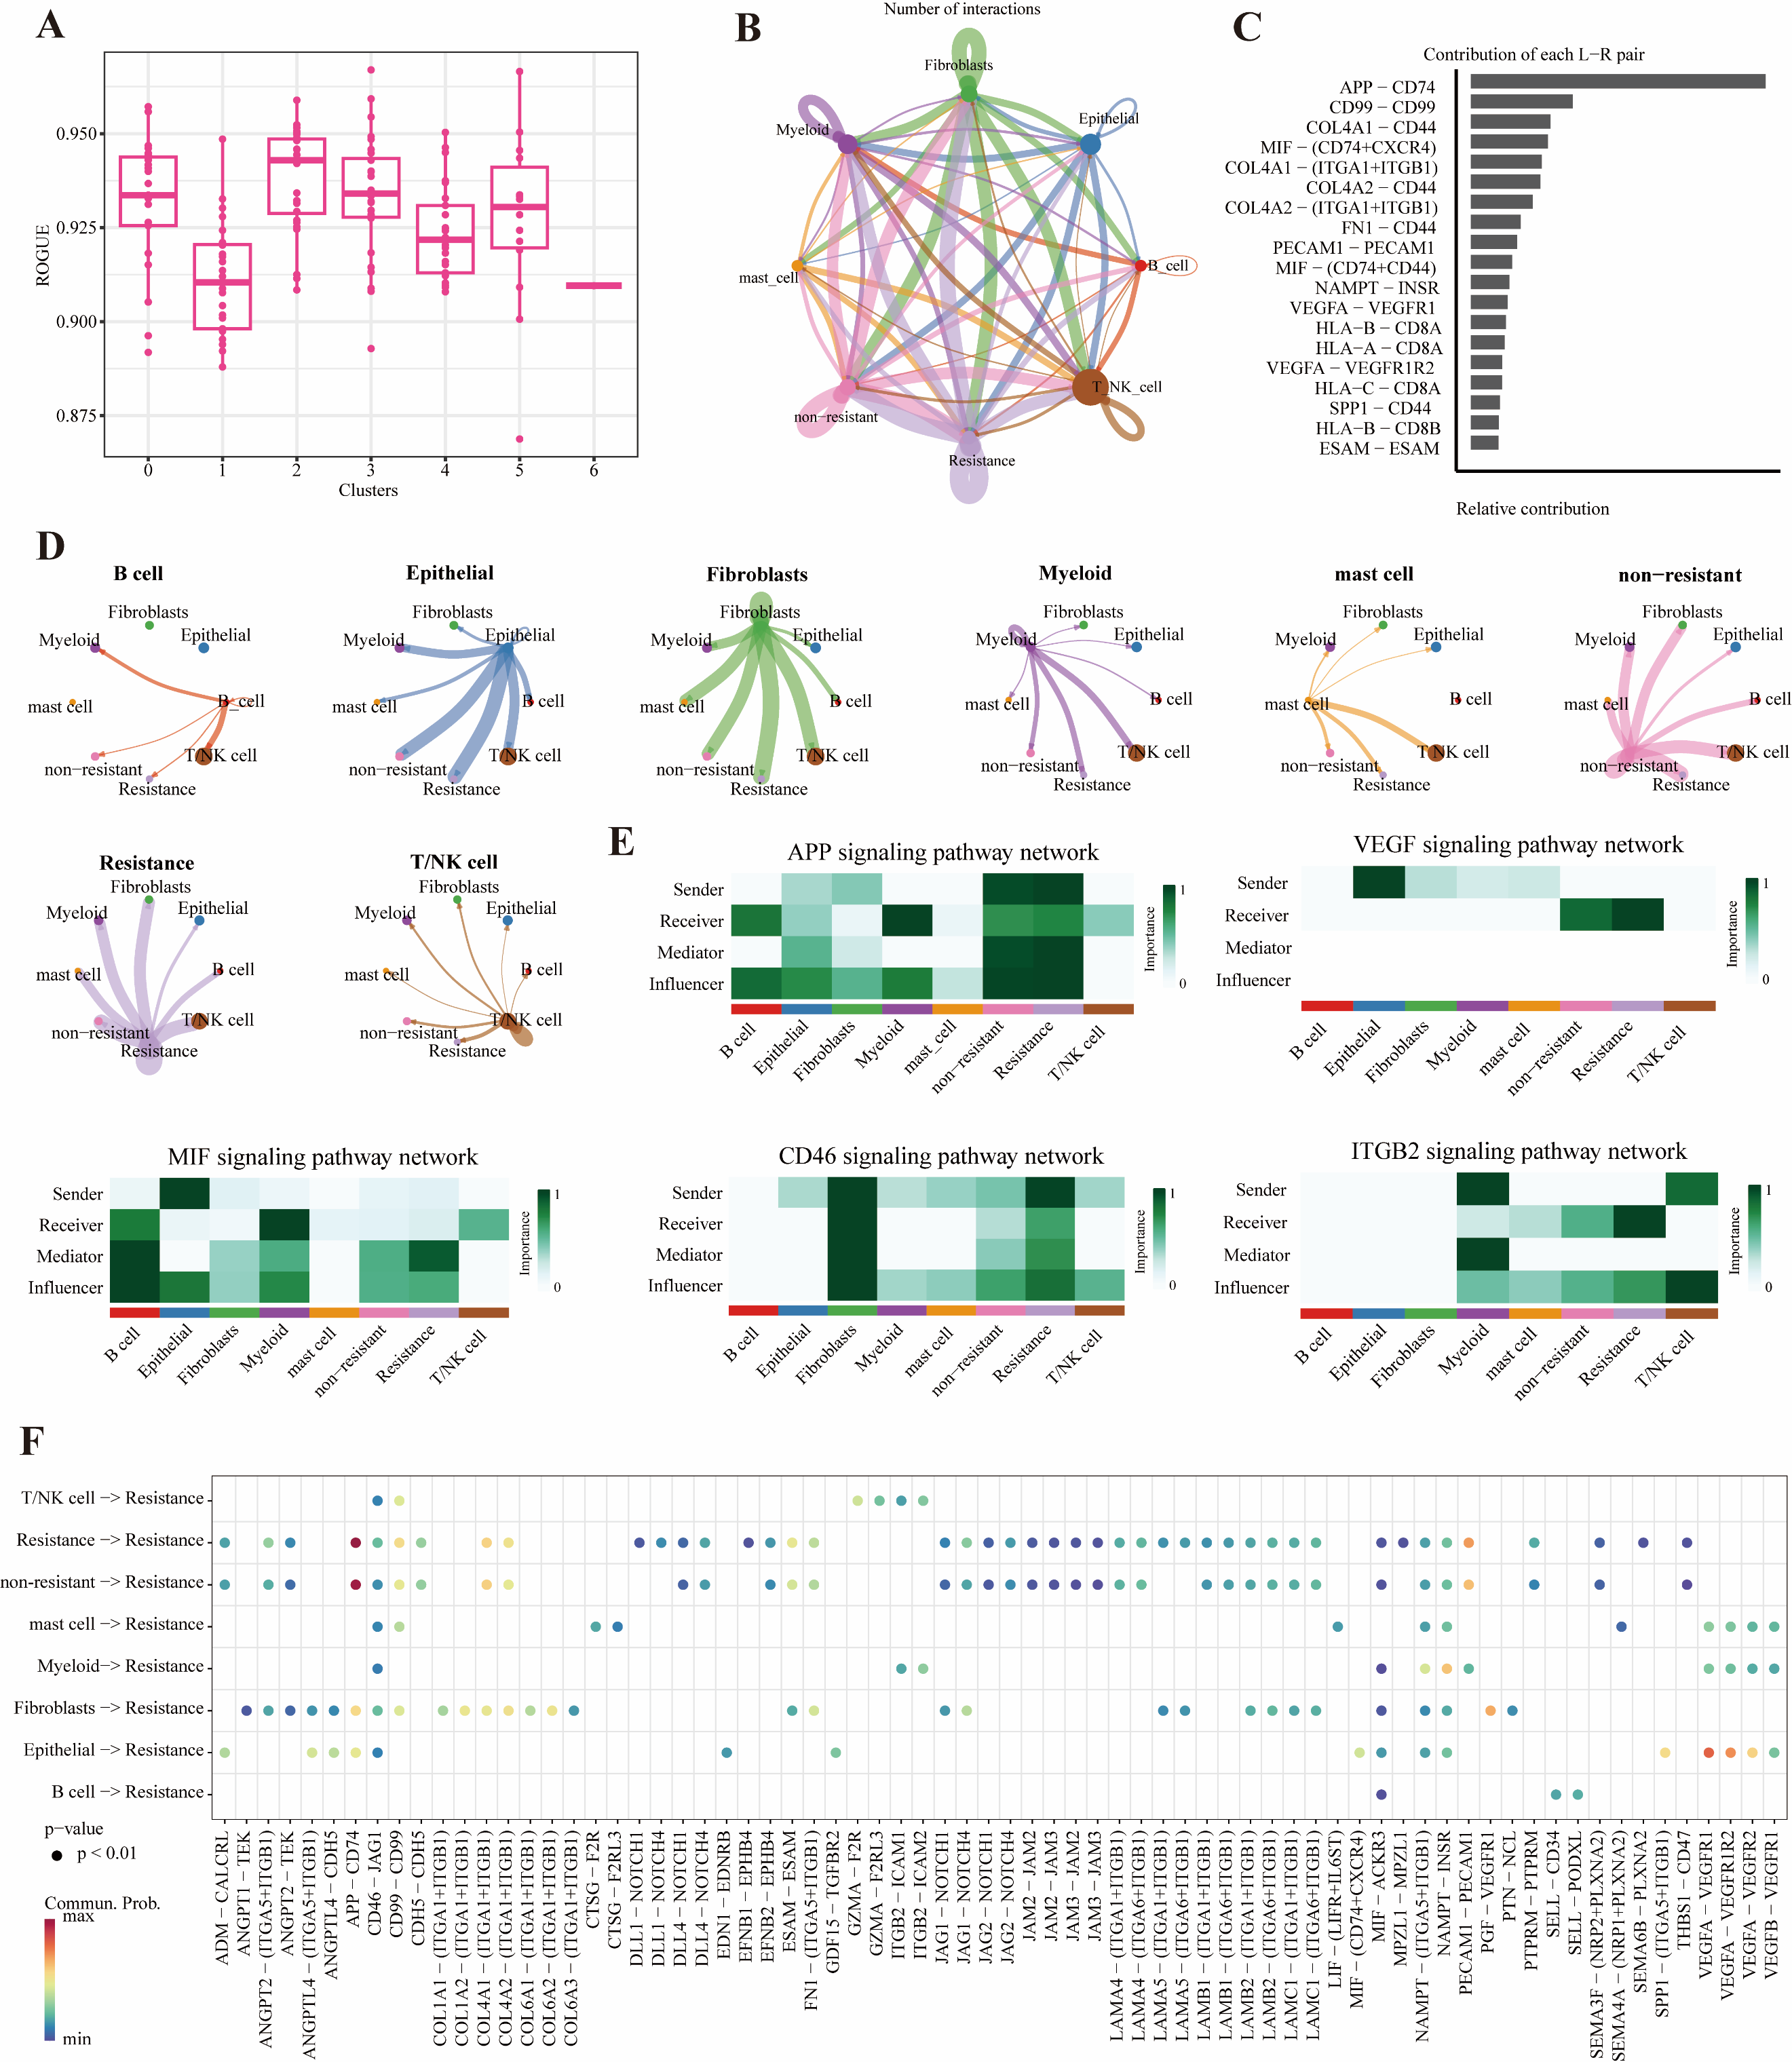


**Figure S2. Supplement to cellular communication. (A)** The ROGUE value of re-clusters. **(B)** The number of interactions in cellular communication. **(C)** The contribution of each L-R pair. **(D)** The communication mode of each cell type. (**E**) The key signaling pathway network. (**F**) The signaling strength of cellular communication as resistant cell.


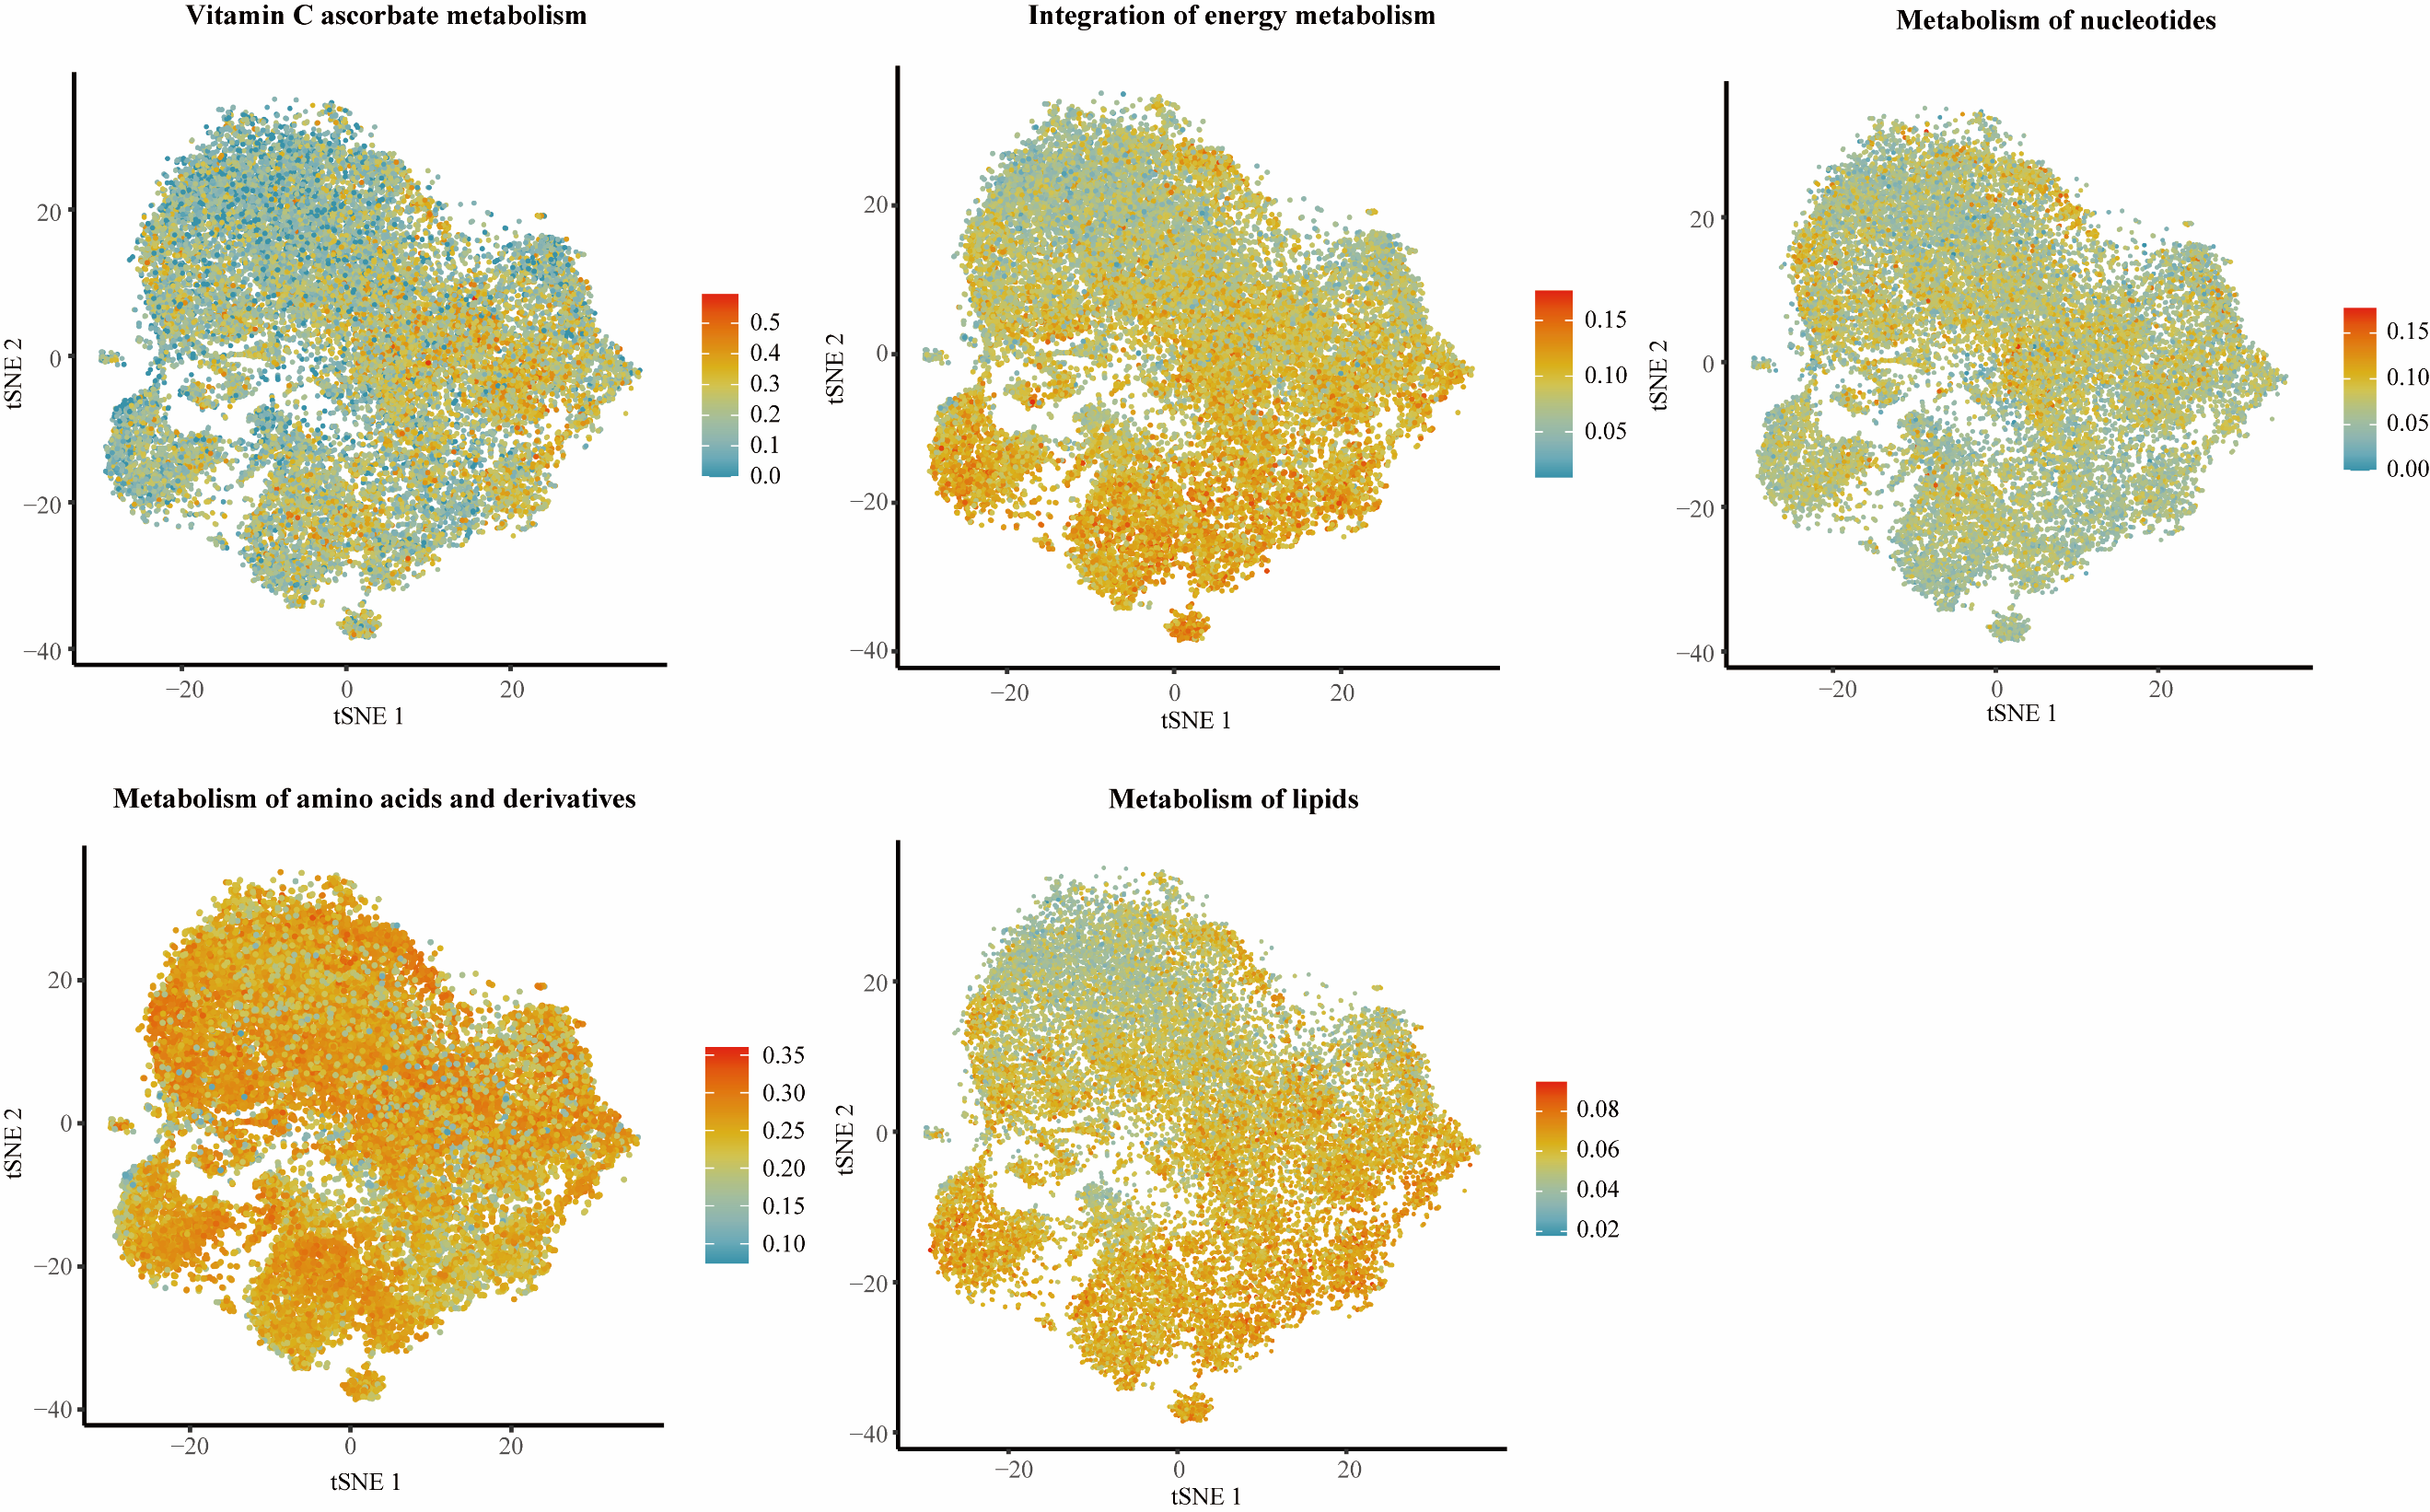


**Figure S3. Metabolite score in re-cluster UMAP reduction.**


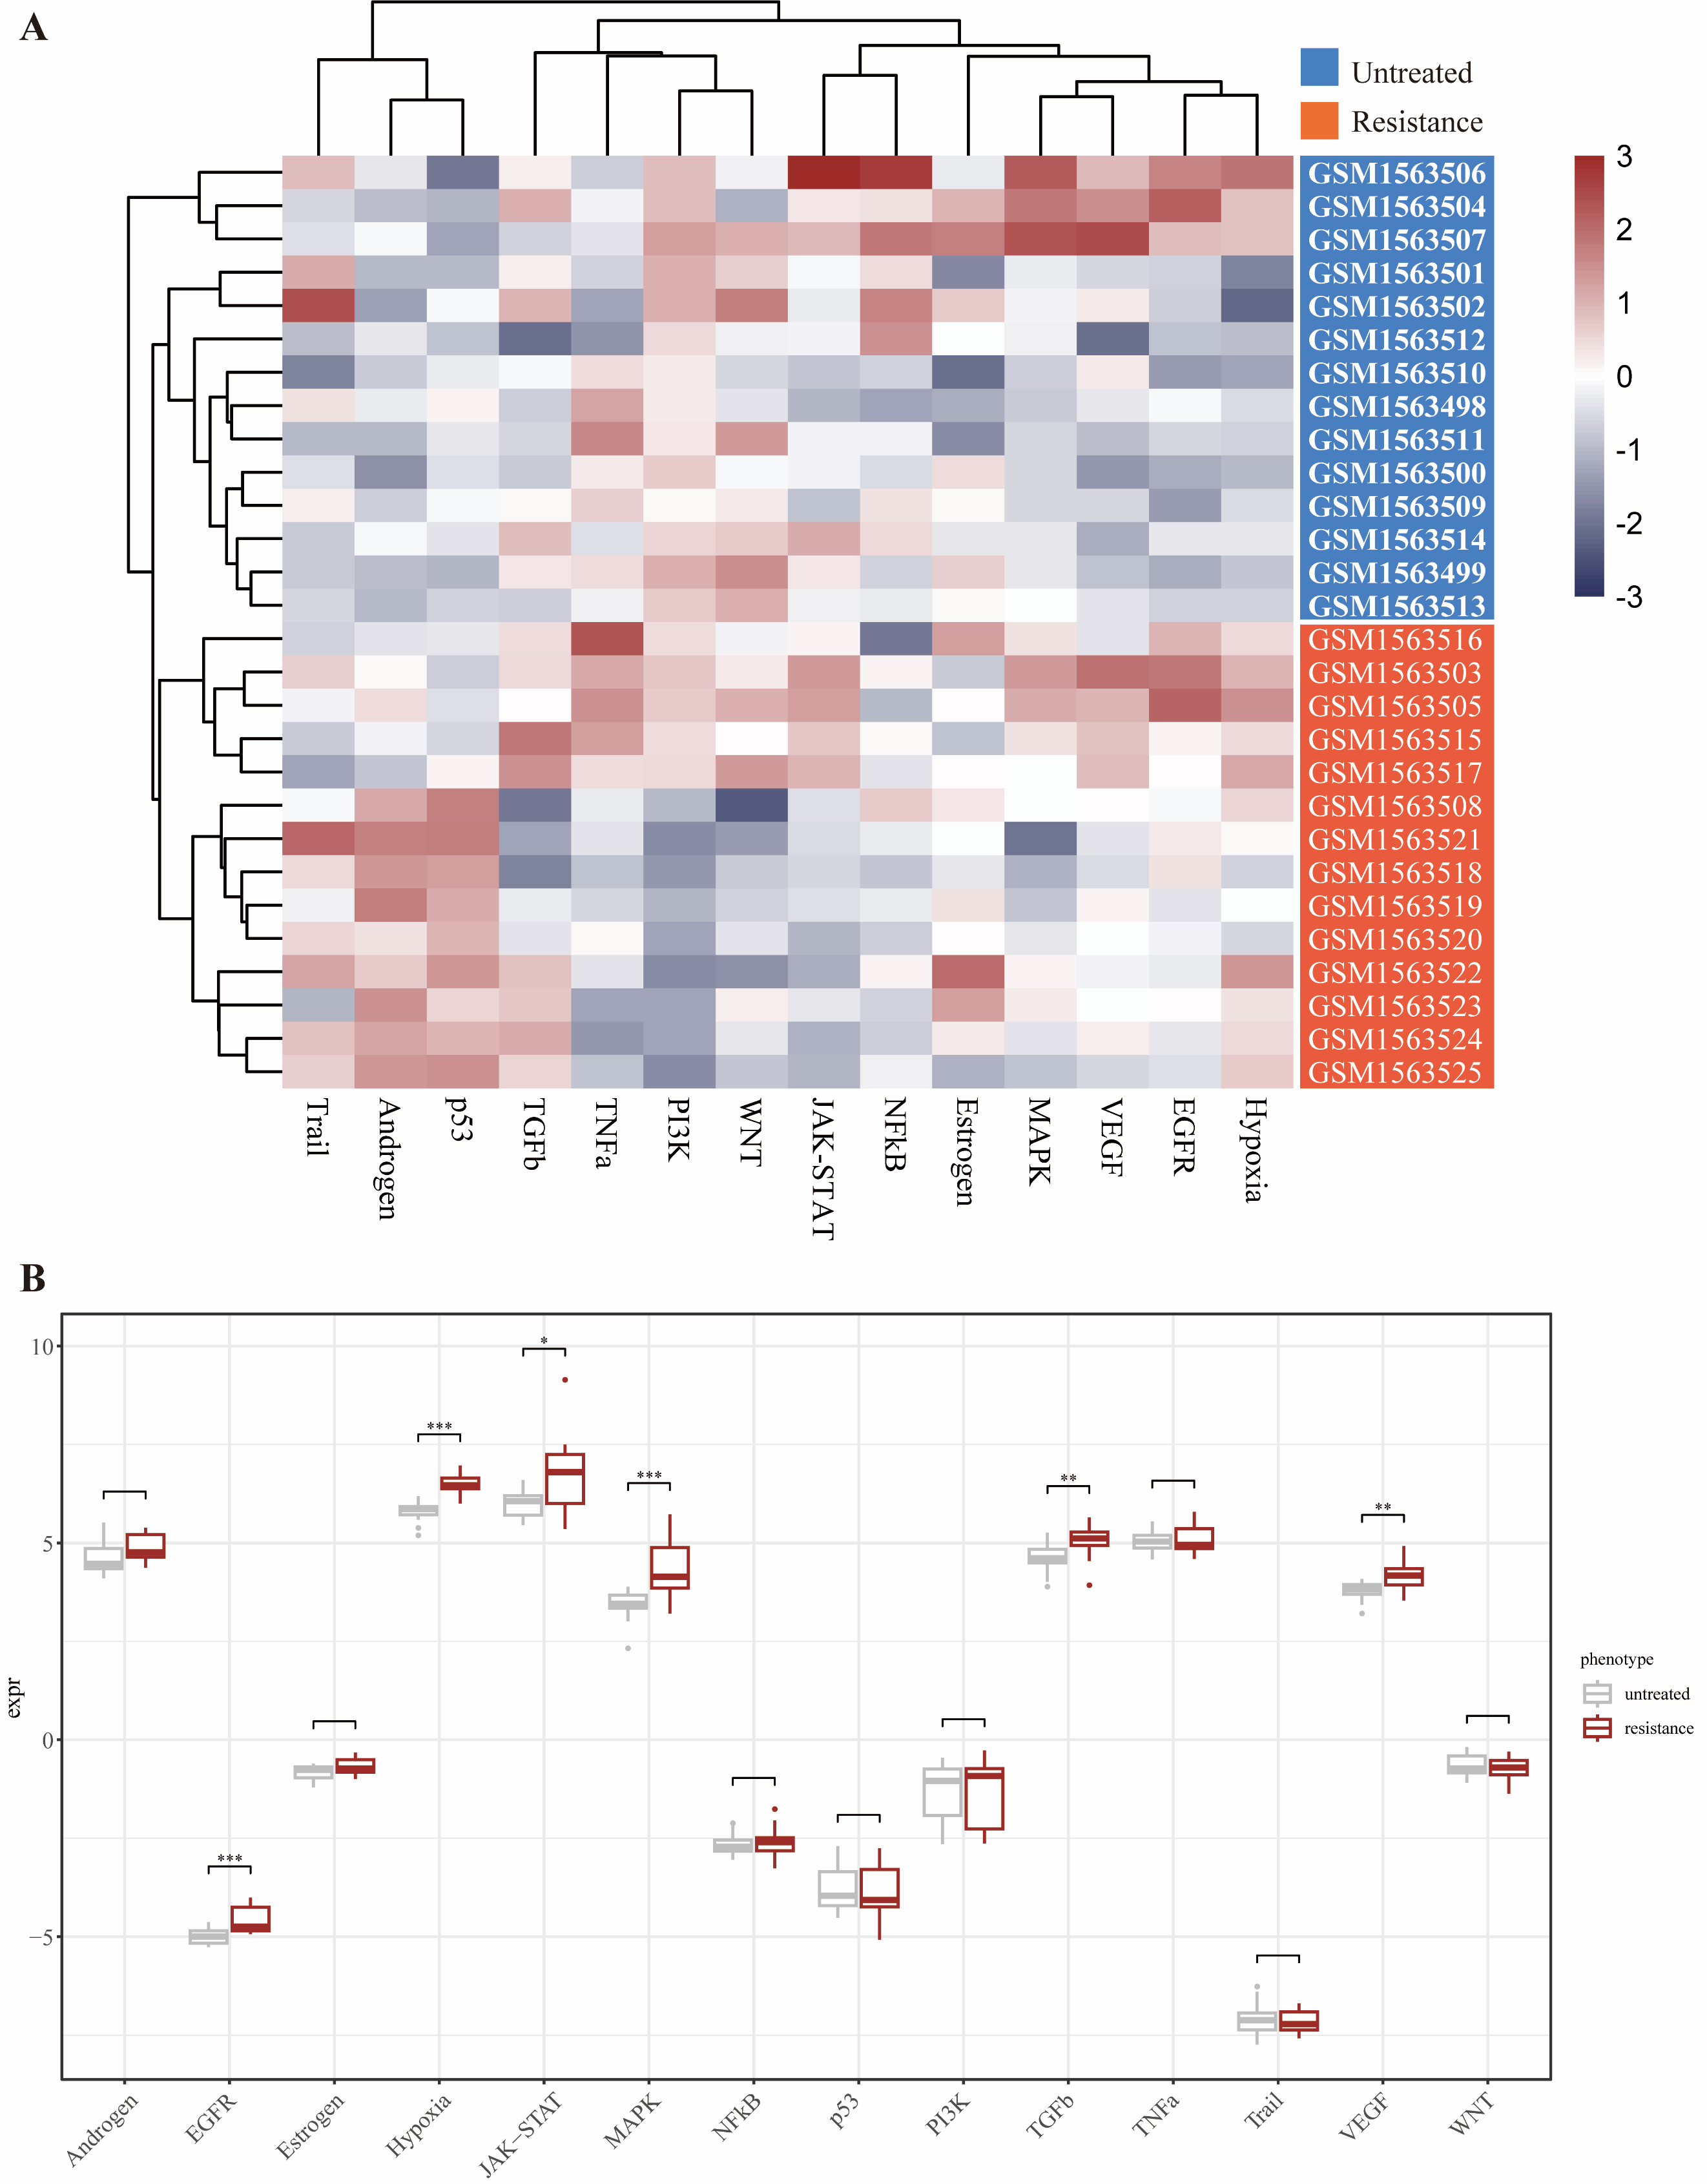


**Figure S4. Supplement to decoupleR activity in real drug response data. (A)** The expression of transcriptional activity in every individual. (B) The differential expression of decoupleR activity in real drug response data.


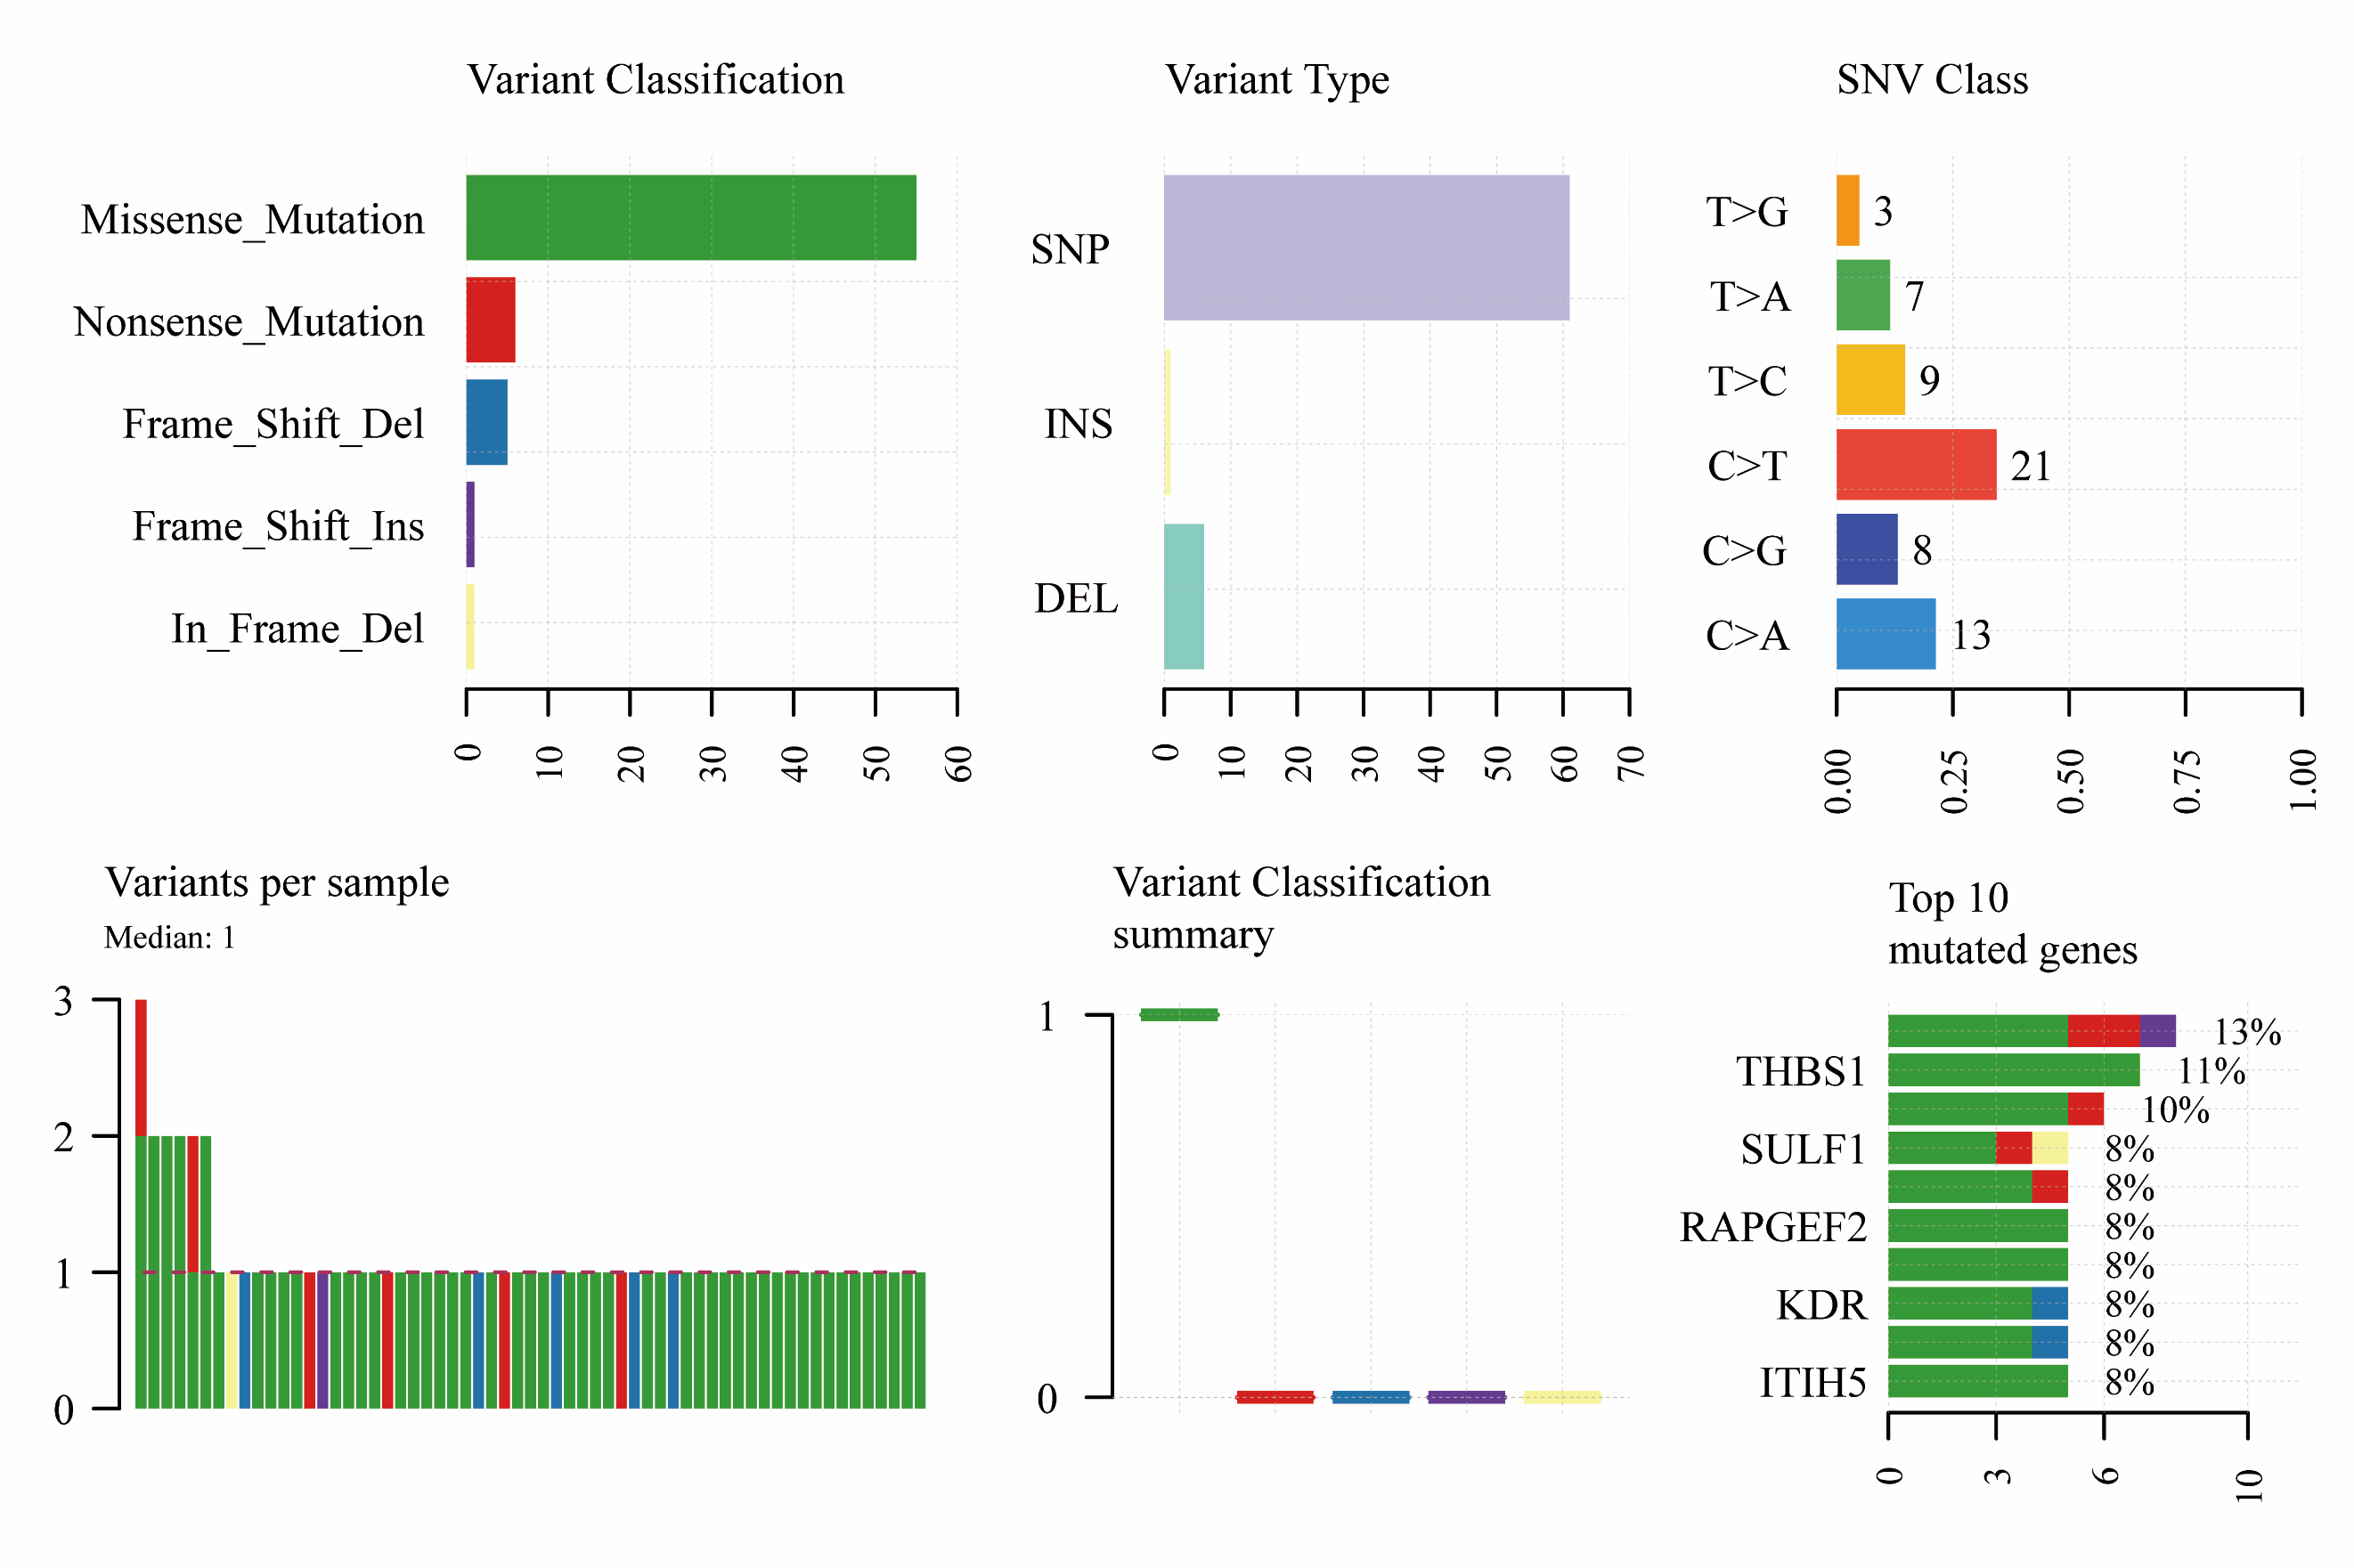


**Figure S5. The summary of the mutation status in resistant genes.**


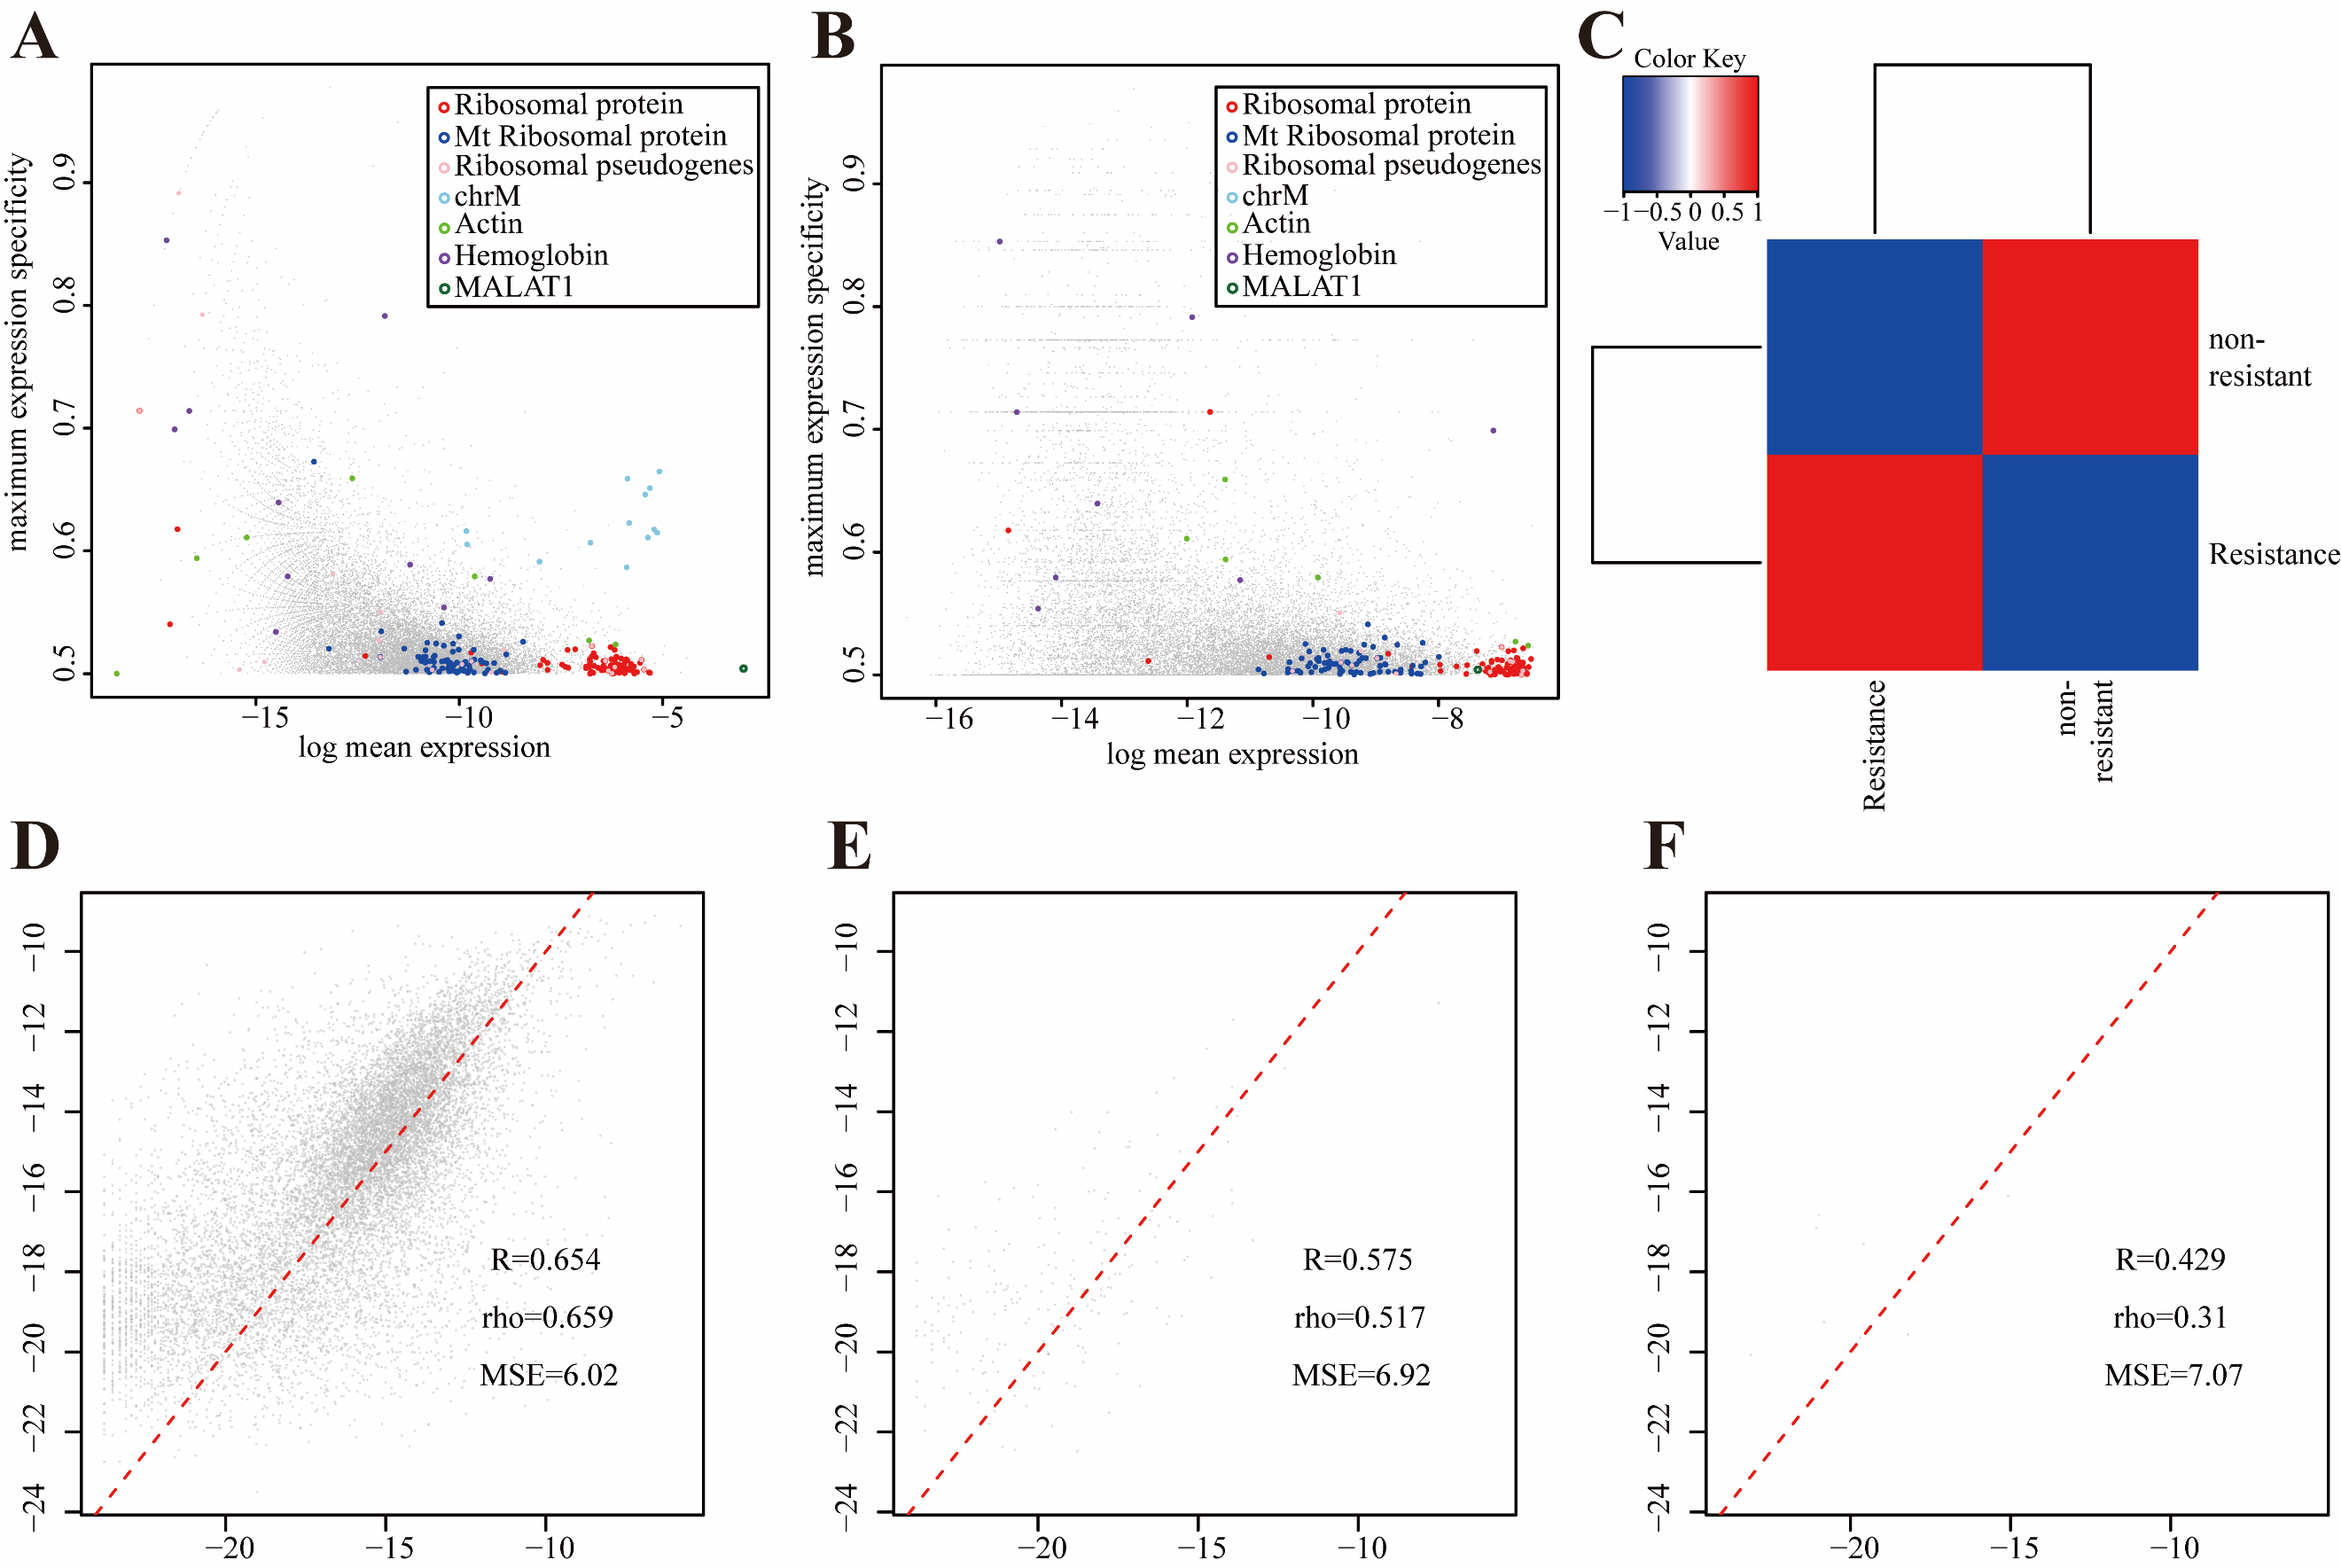


**Figure S6. The process of BayesPrism deconvolution quality control process.**


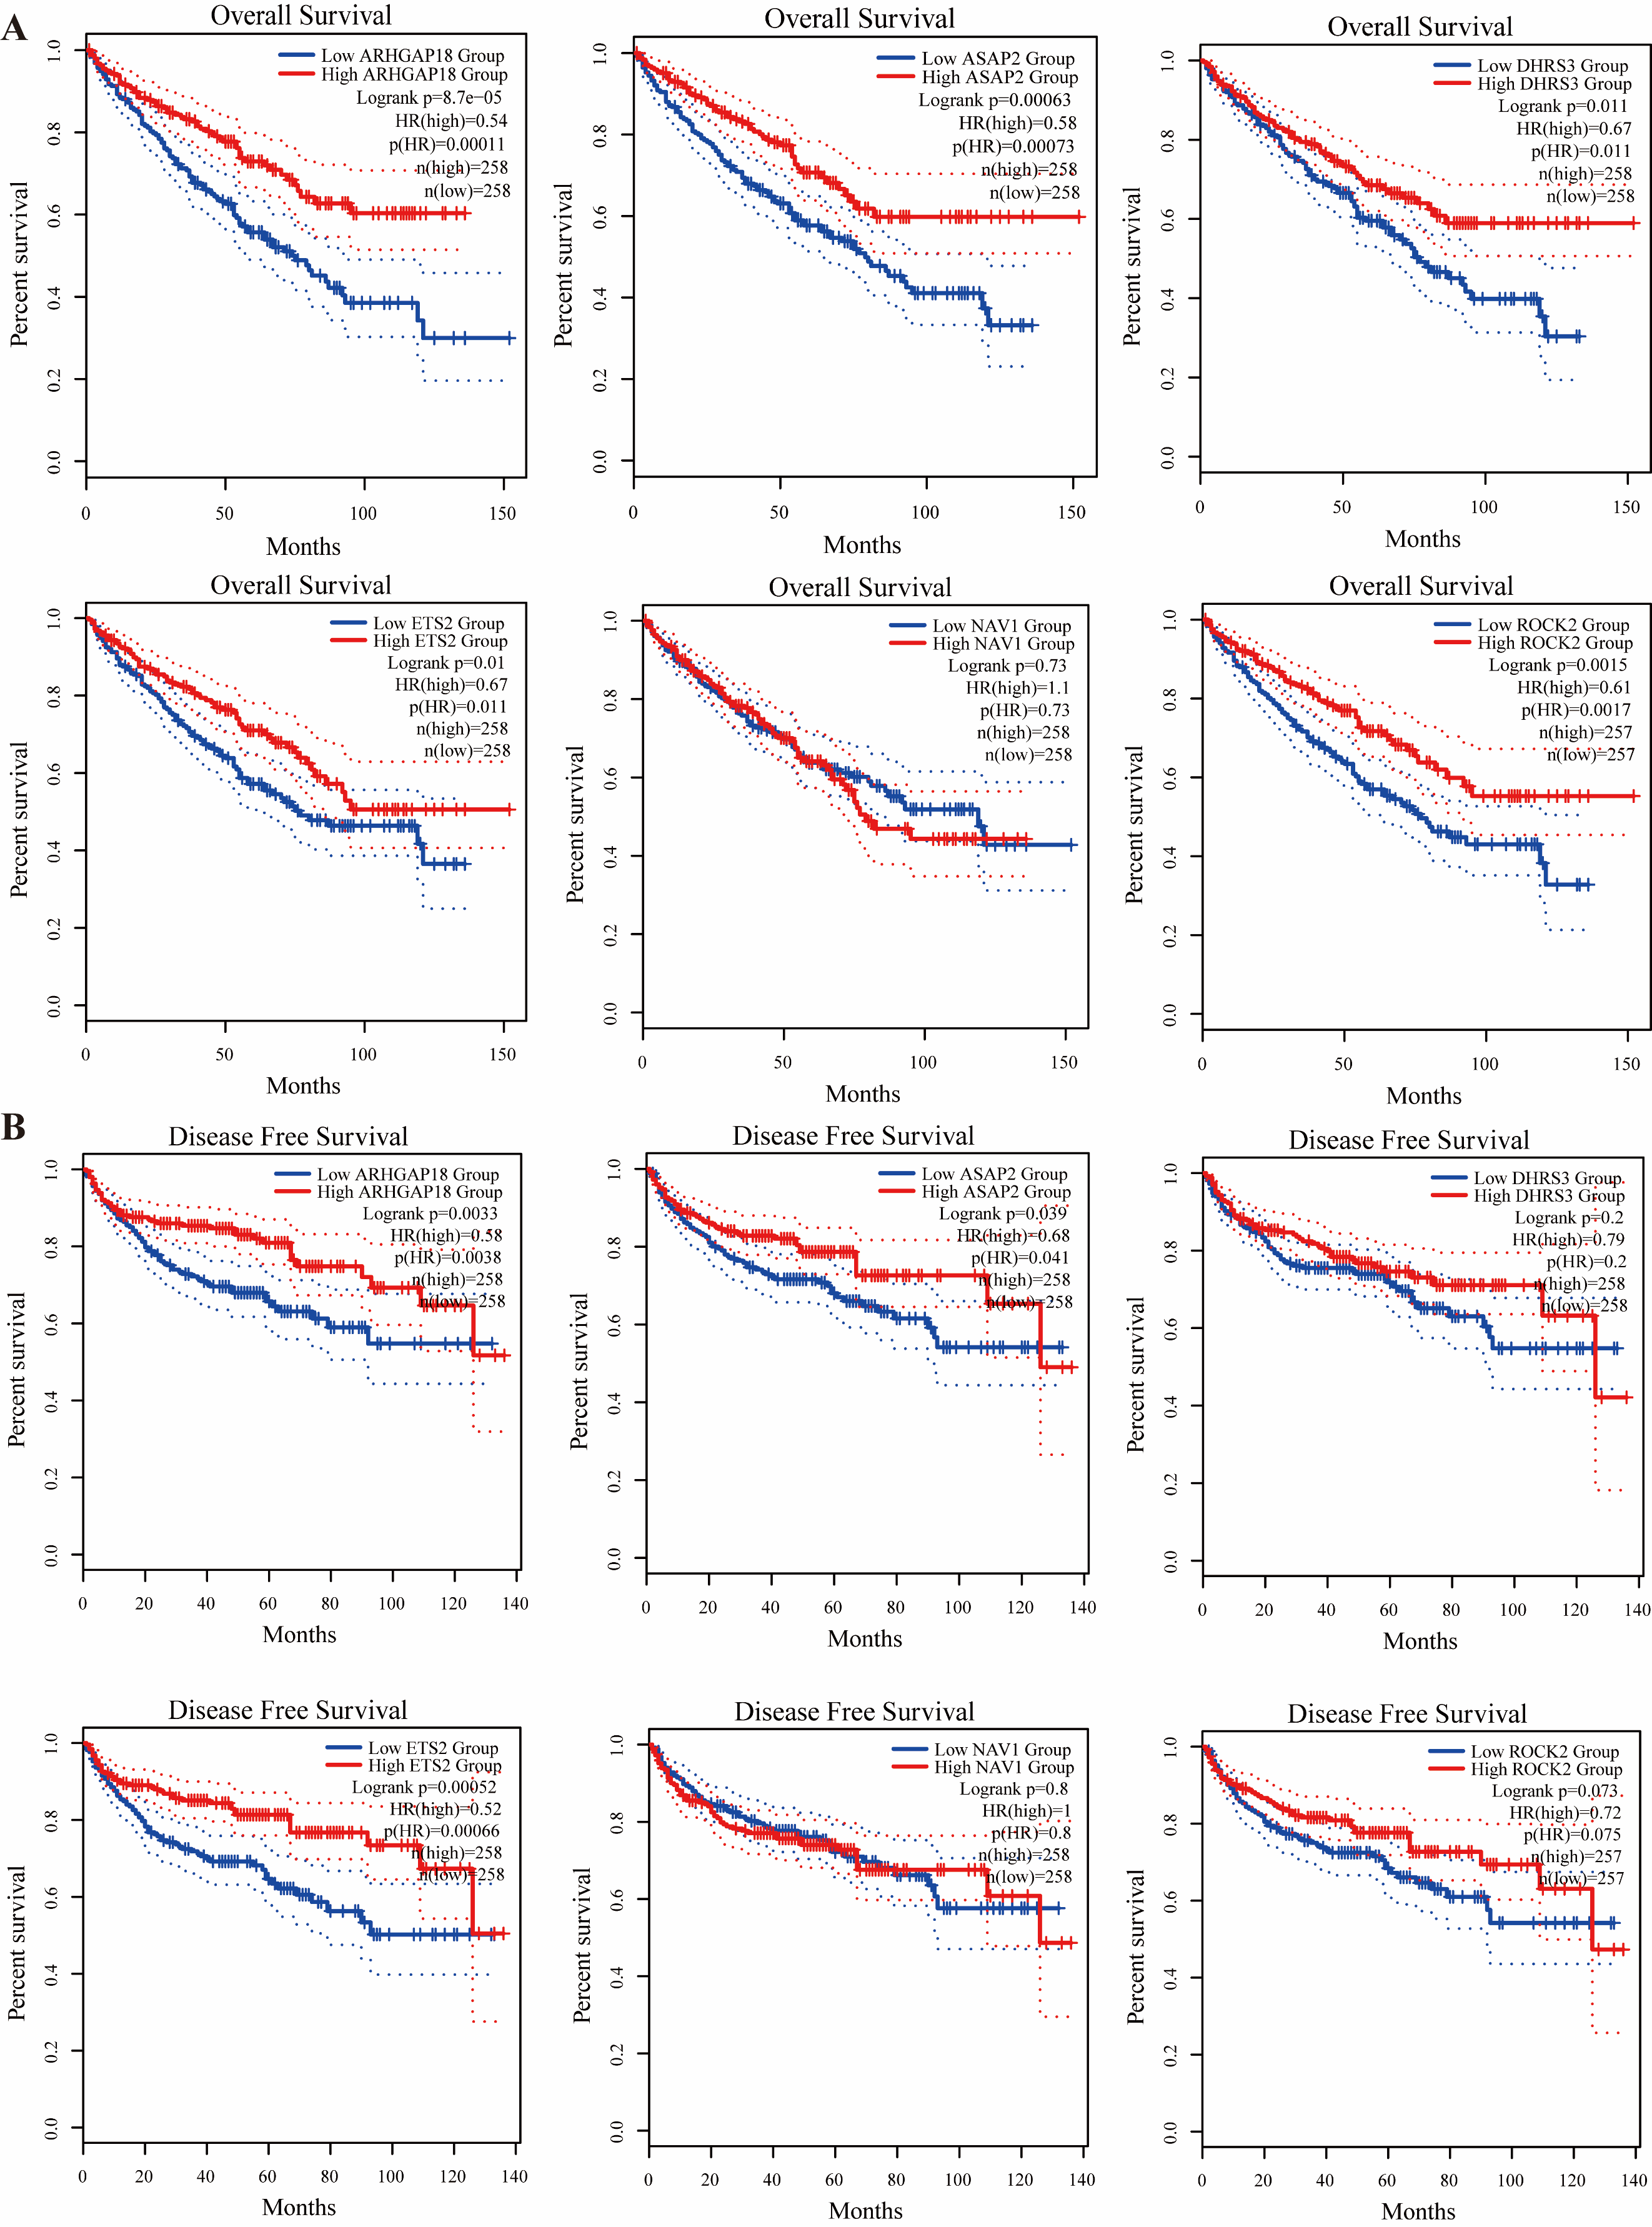


**Figure S7. Supplement to six key genes’ survival analysis. (A)** The KM curve of six key genes with the overall survival. **(B)** The KM curve of six key genes with the disease free survival.


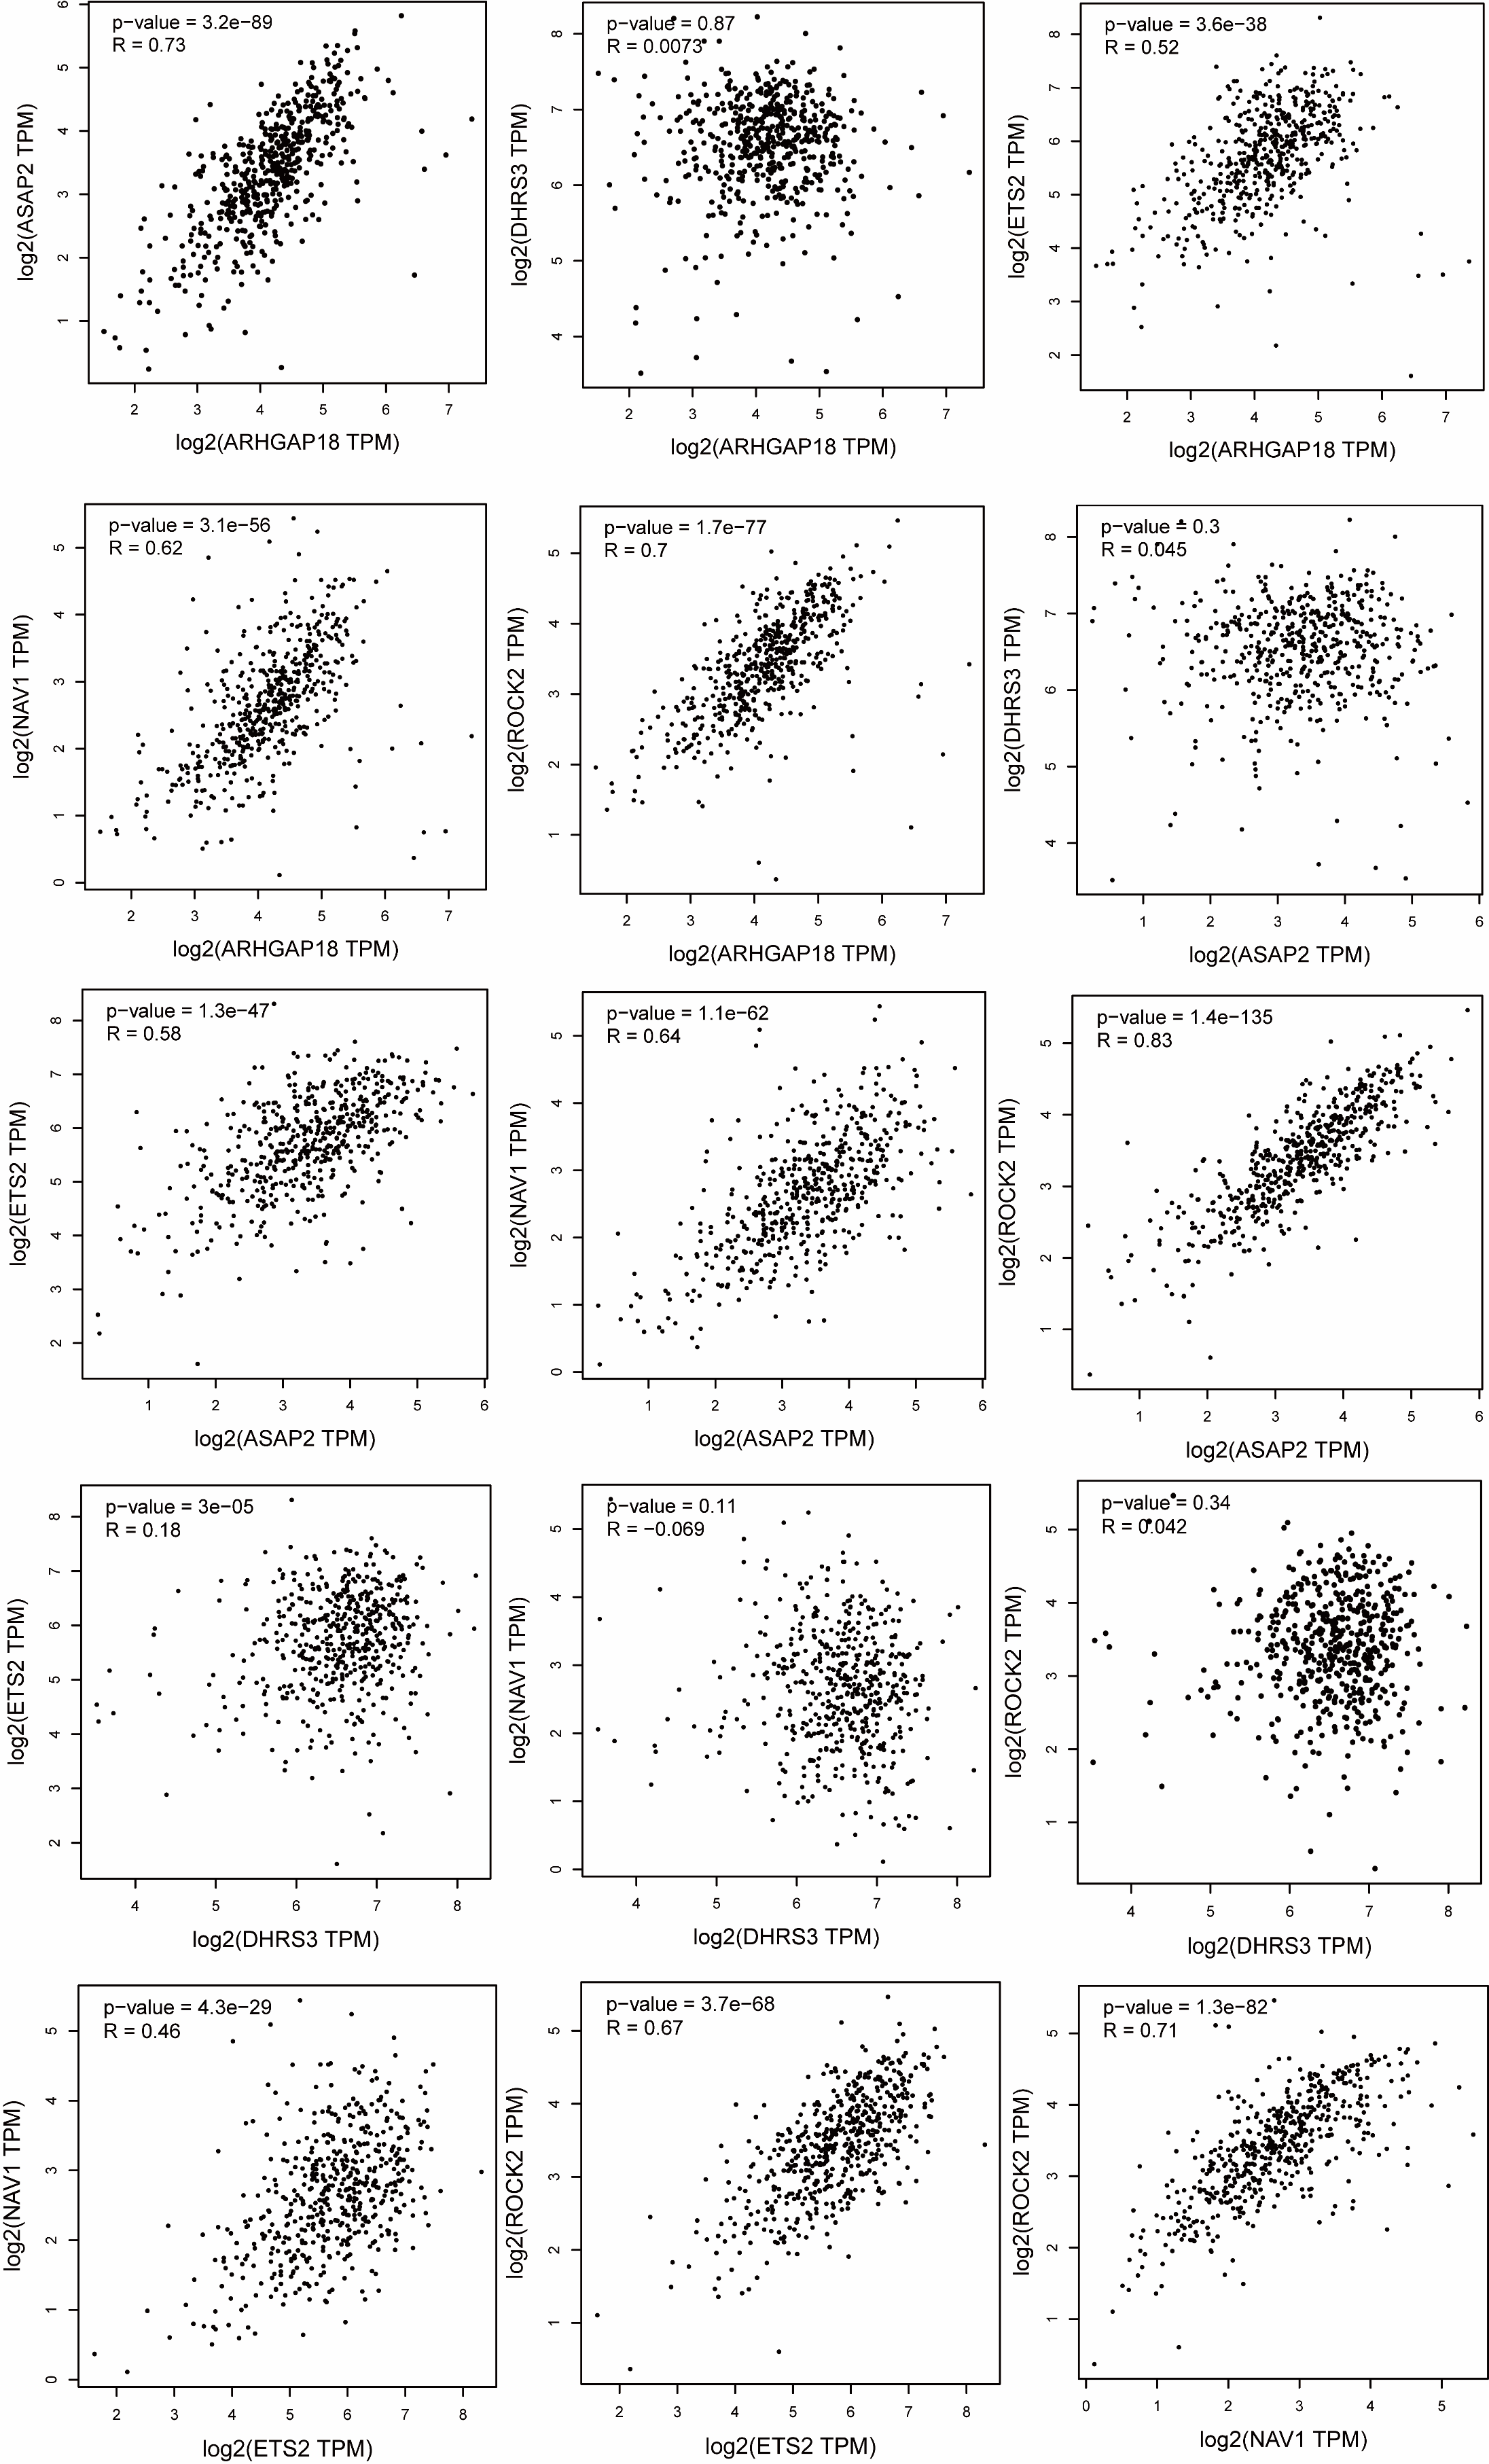


**Figure S8. Supplement to the six key genes’ correlation analysis with each other.**


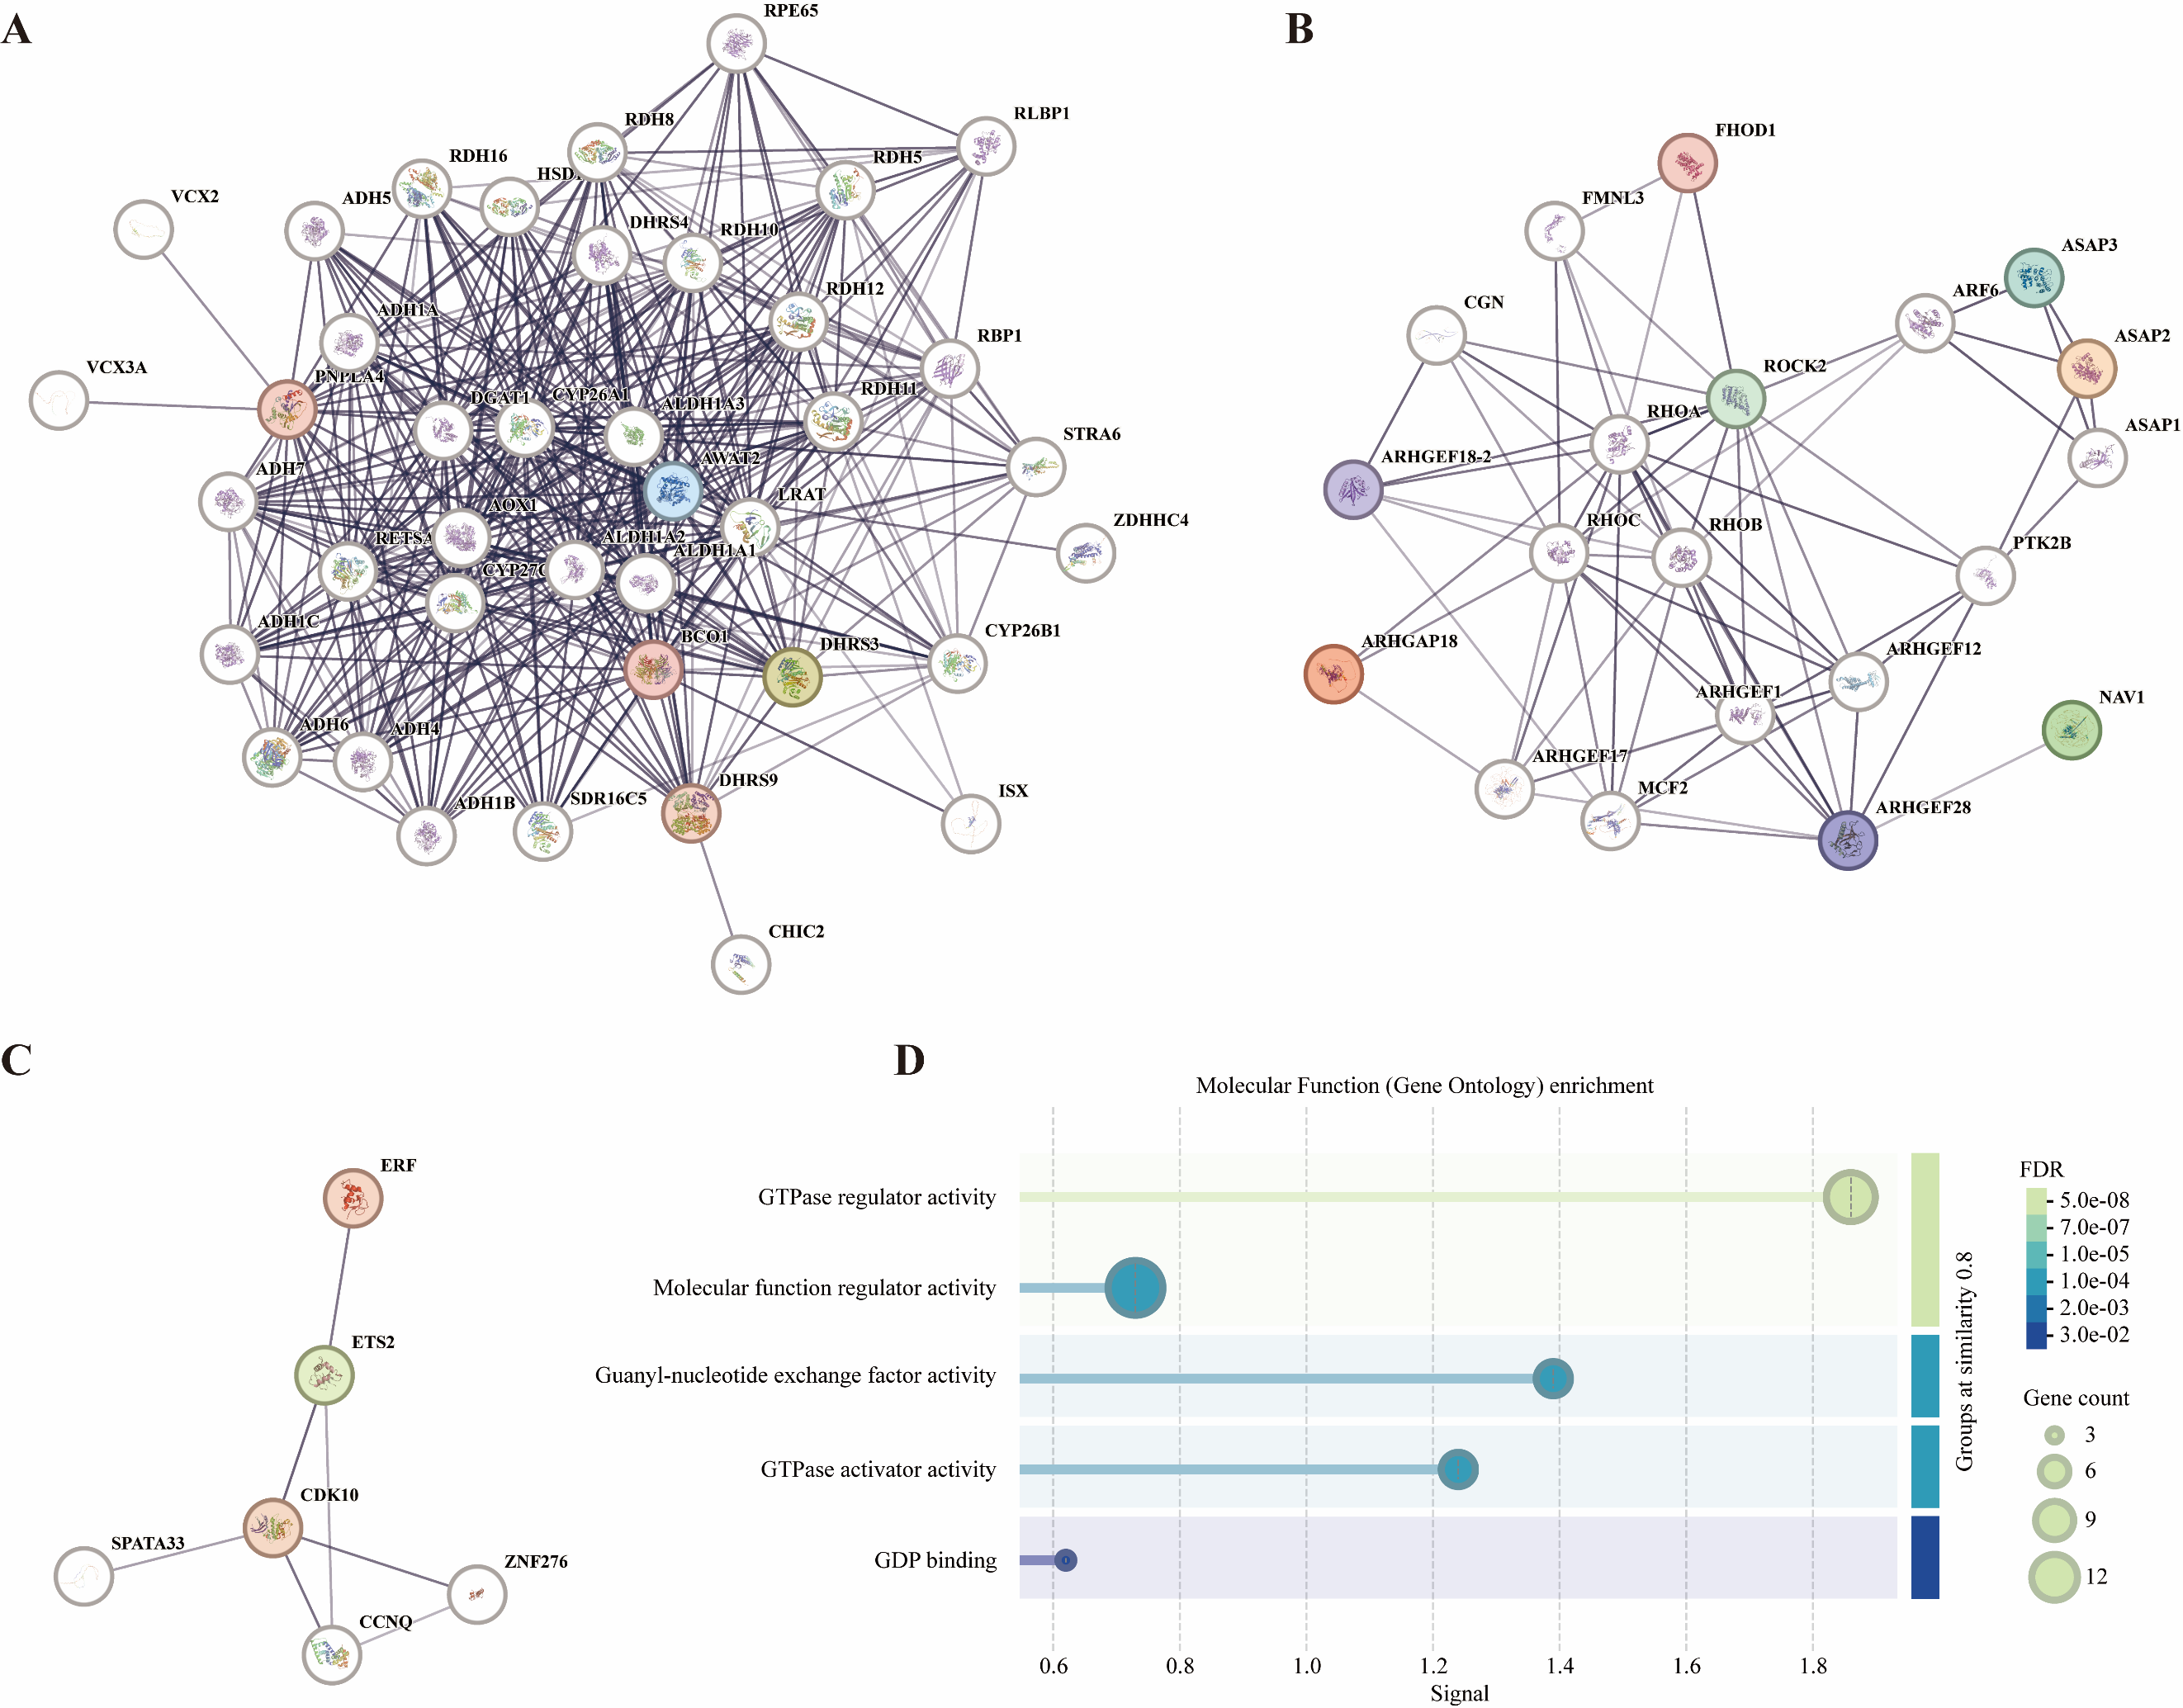


**Figure S9. Supplement to the six key genes’ PPI network. (Notes: Due to the limited number of six genes, this study increased the number of nodes until the p-value of the PPI network was less than 0.05) (A-C)** Three core PPI networks clustered under significant conditions. **(D) The** pathway enrichment analysis of all PPI network nodes.


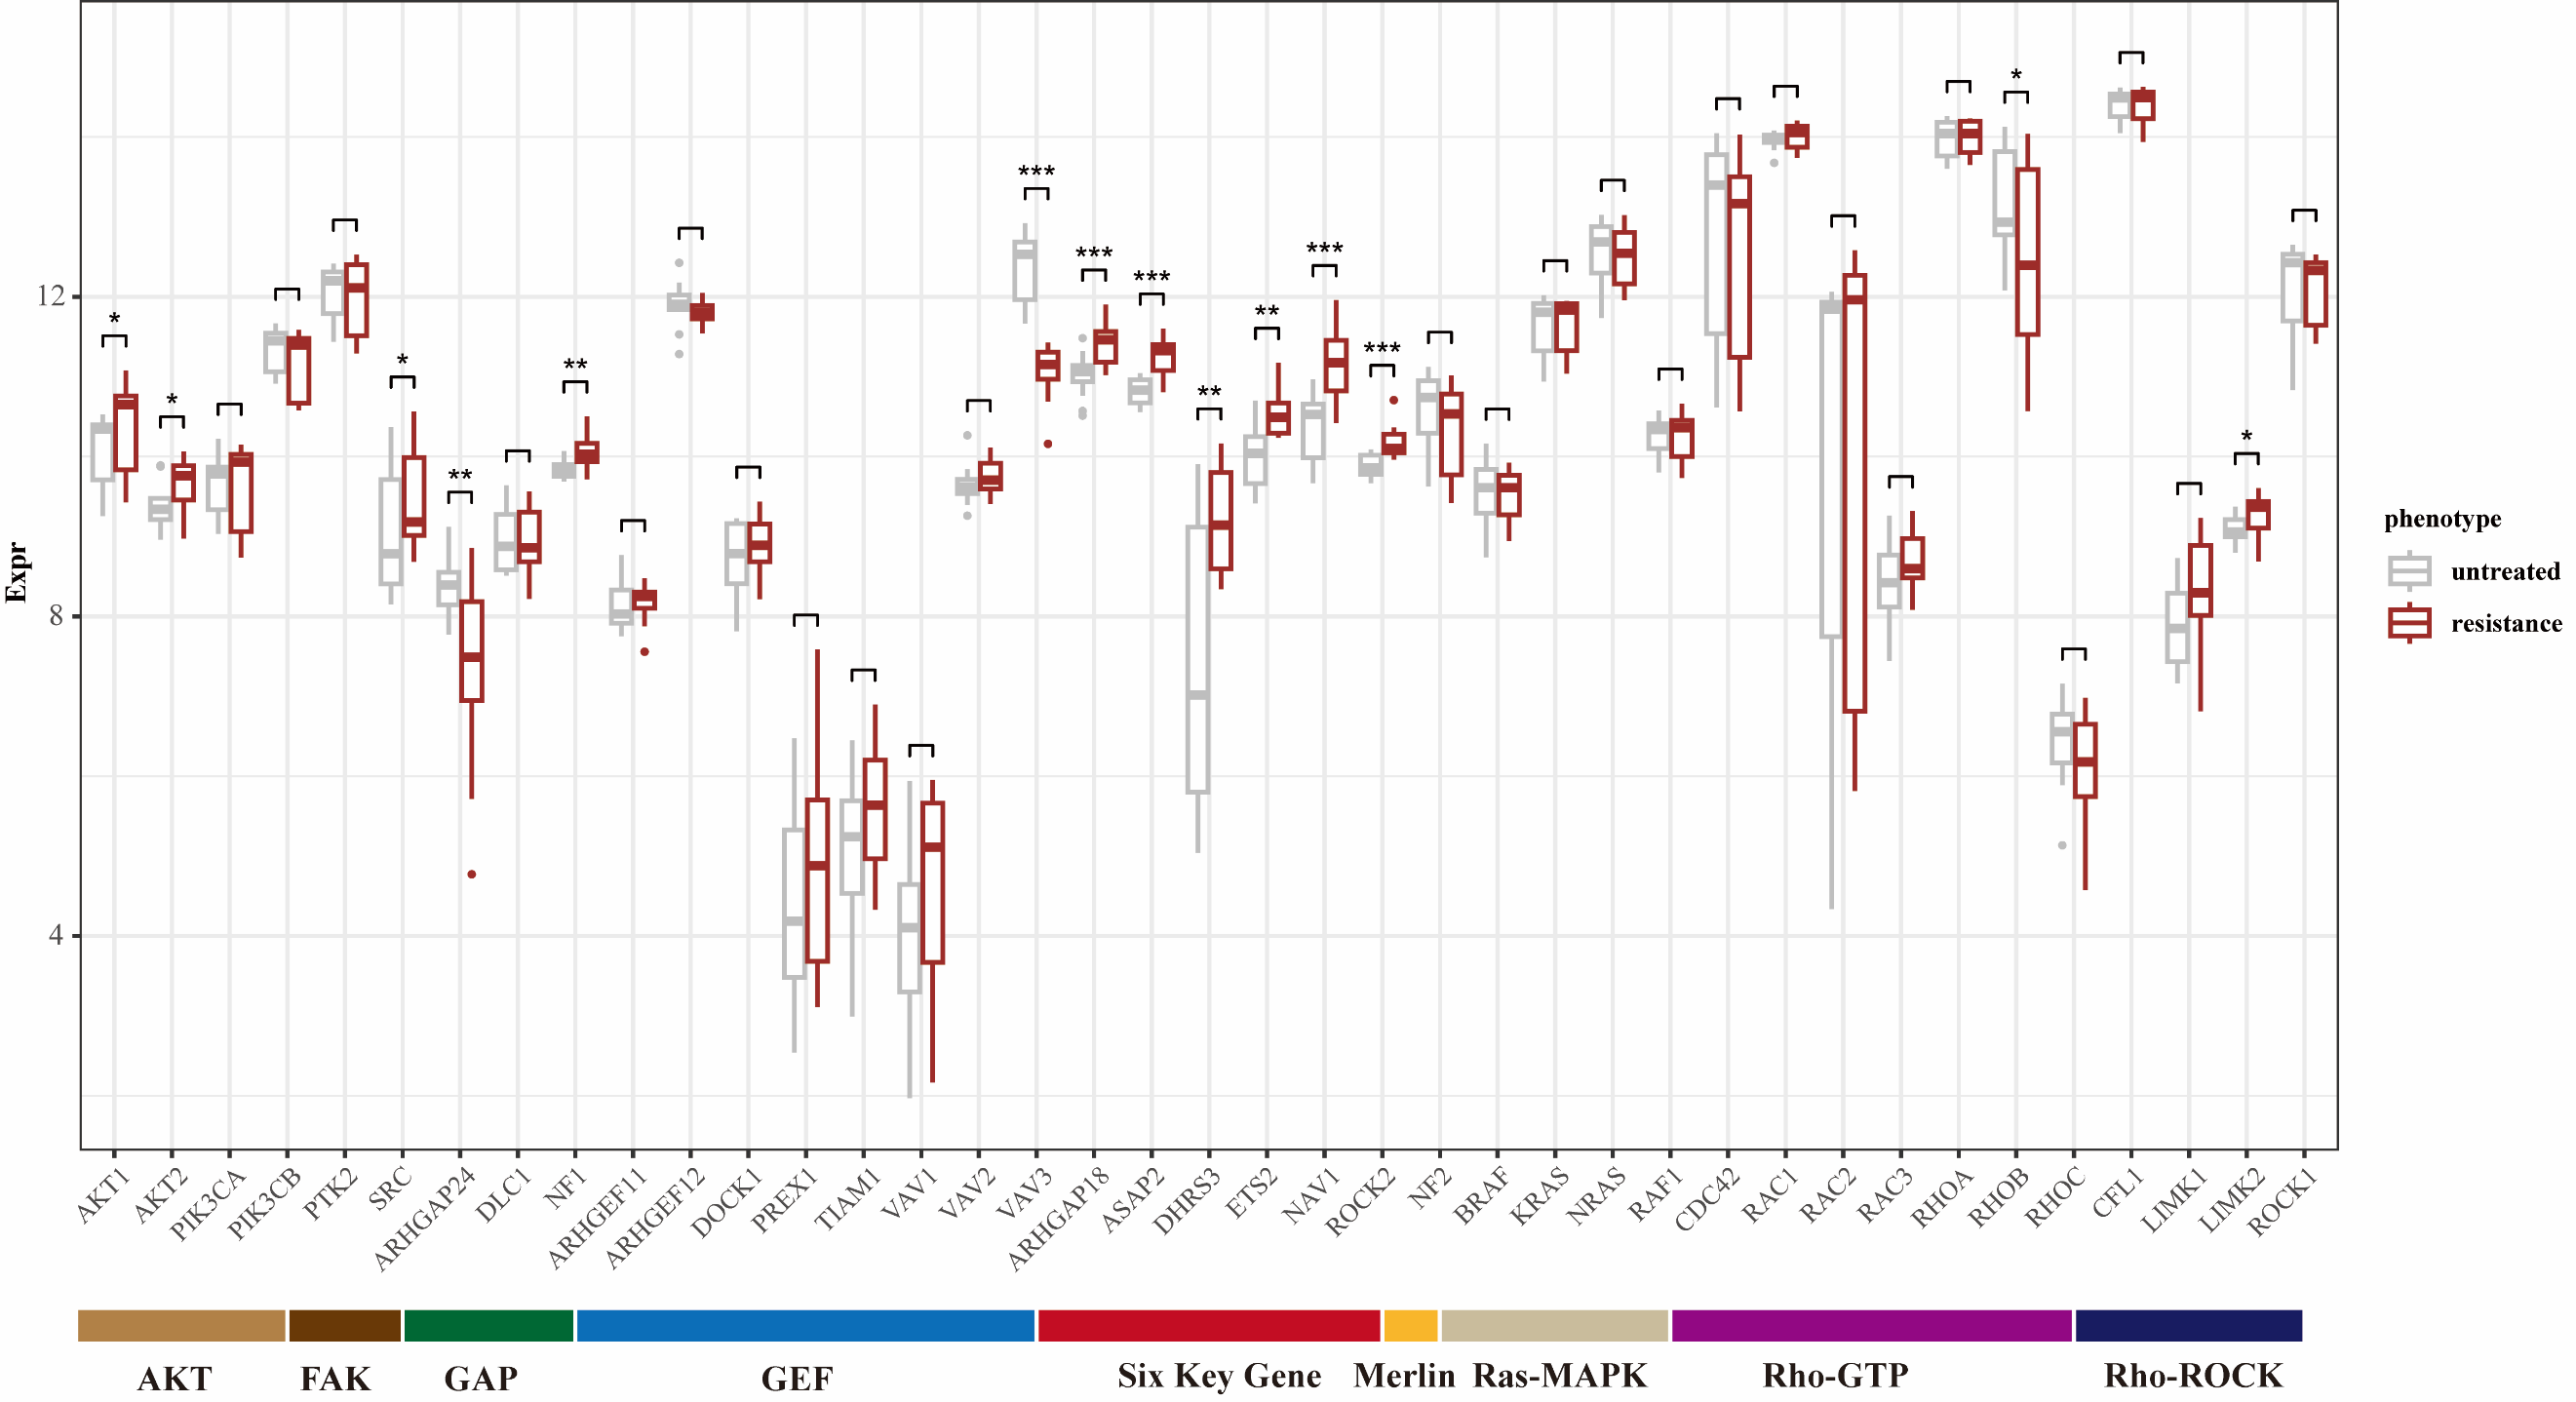


**Figure S10. The differential expression of six genes and their related biological functional genes in real drug response data.**


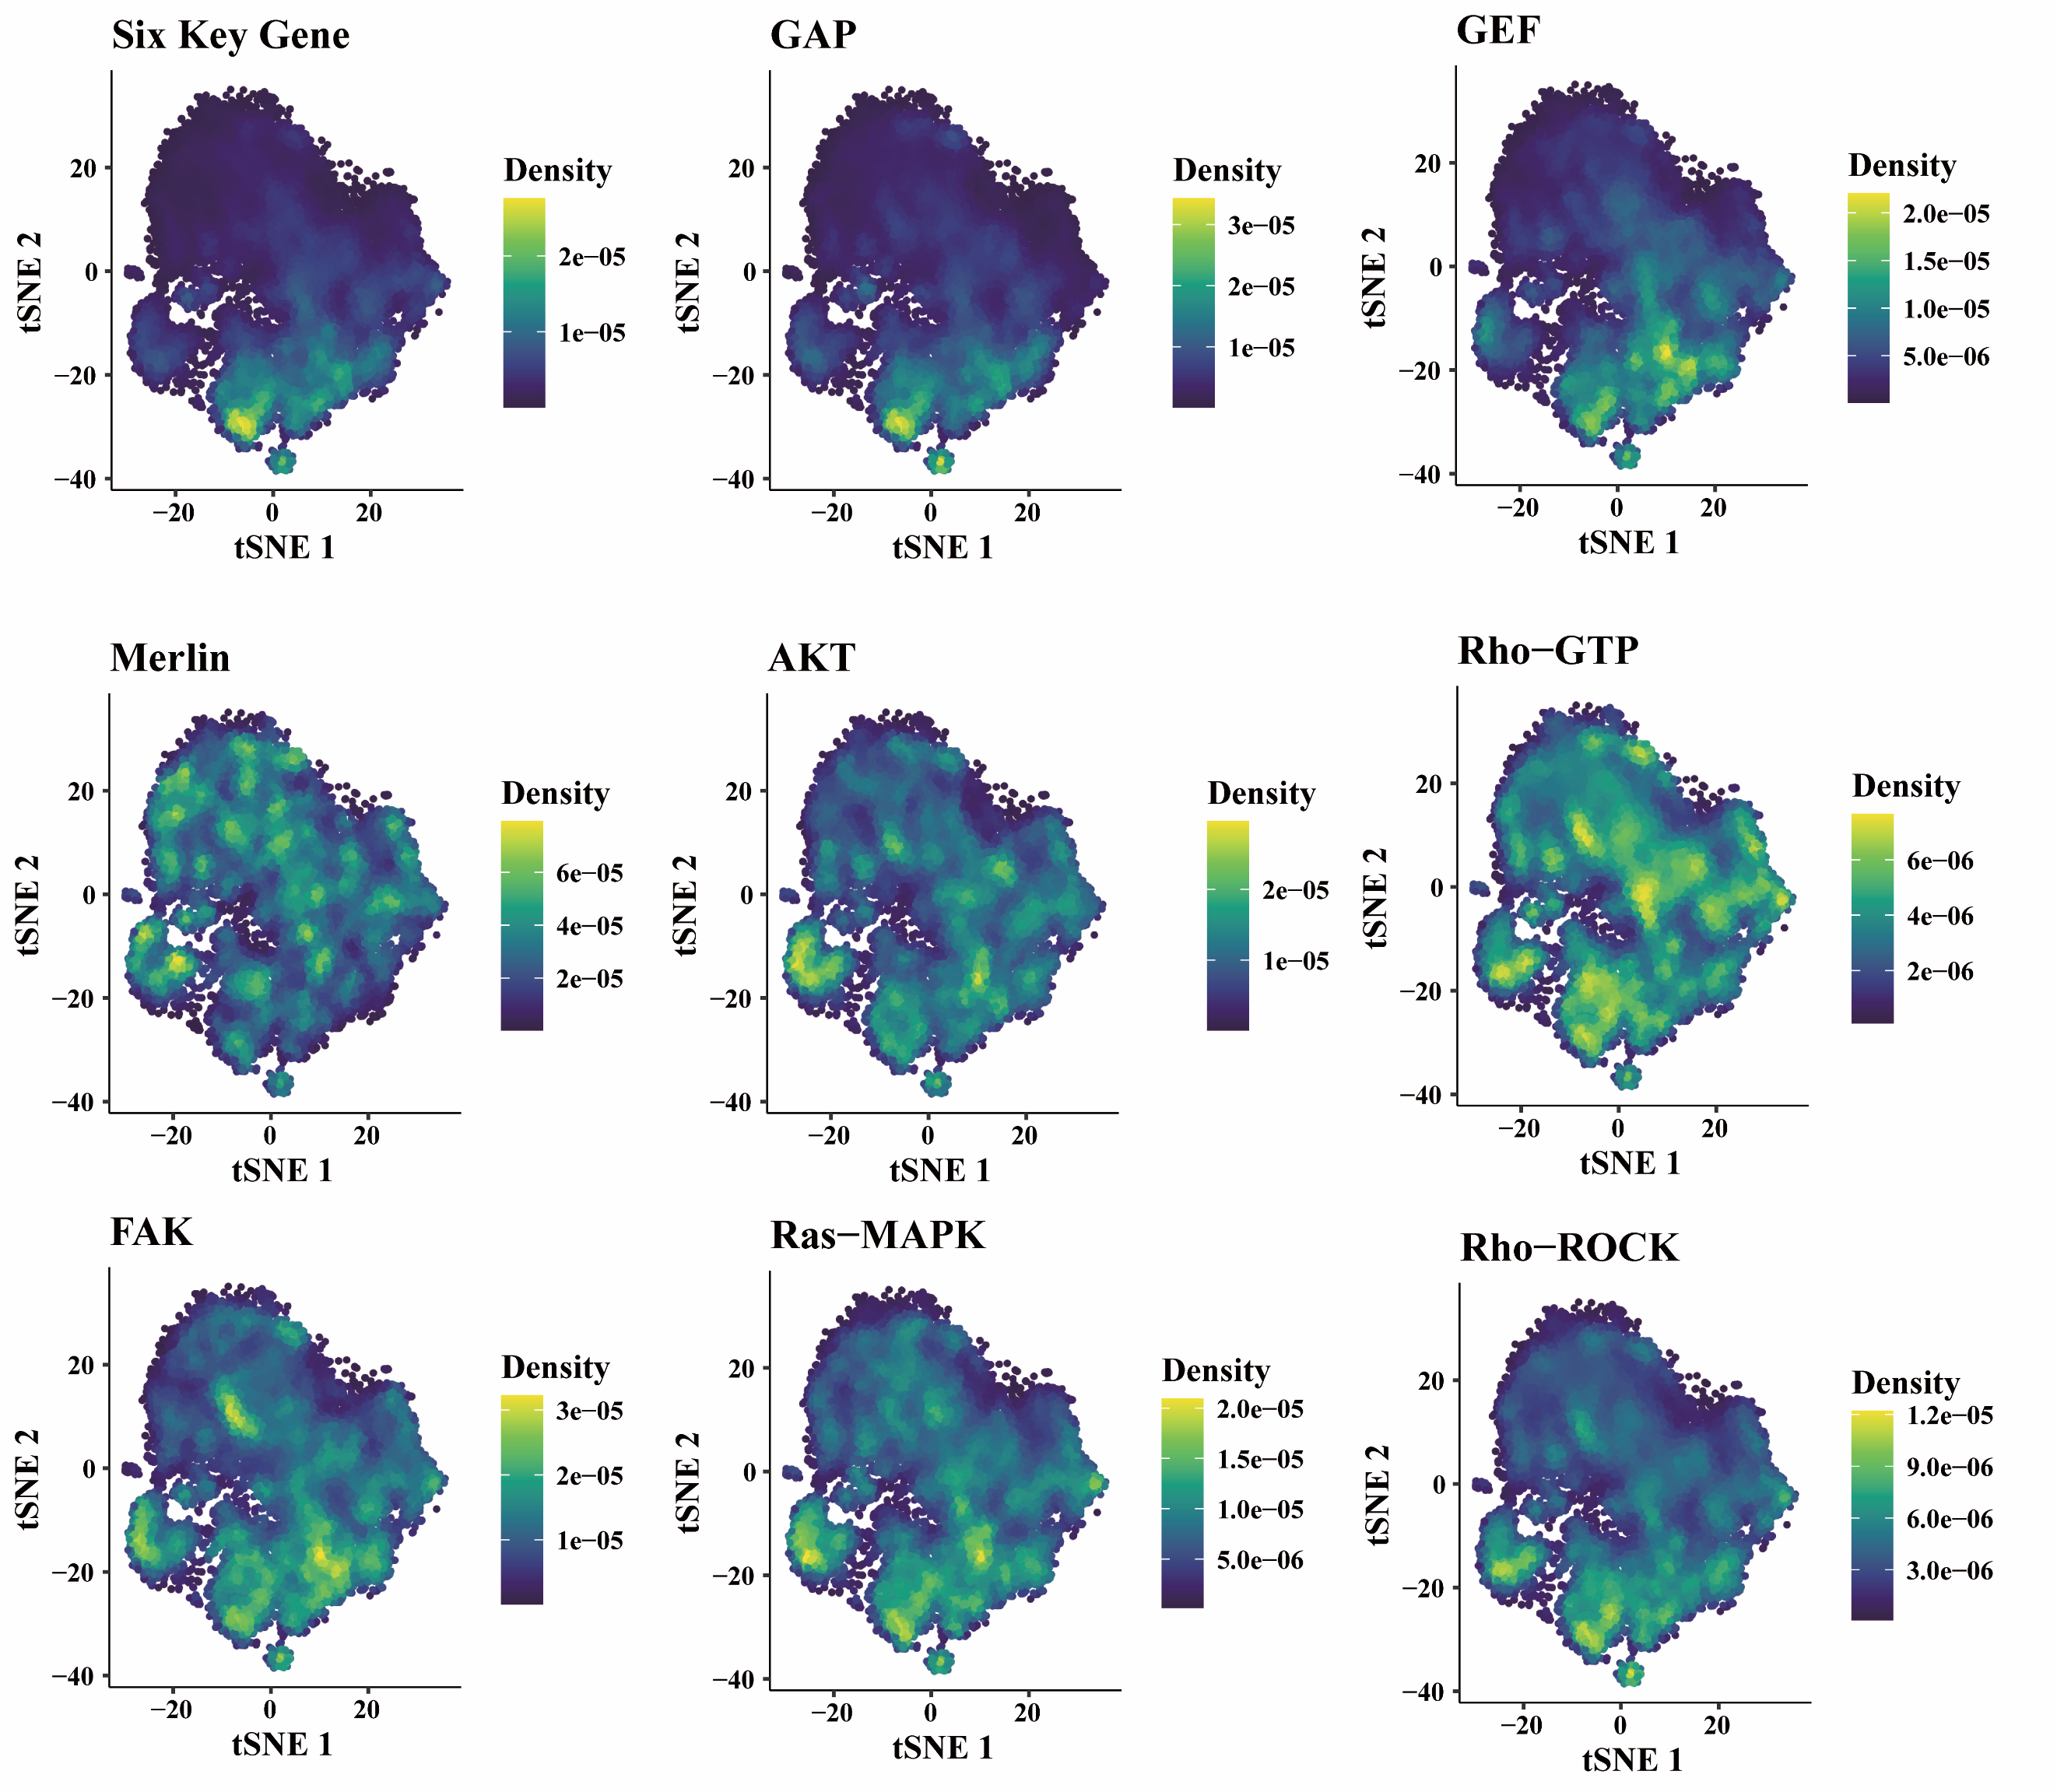


**Figure S11. The kernel density plot of six genes and their related biological functional genes in real drug response data.**


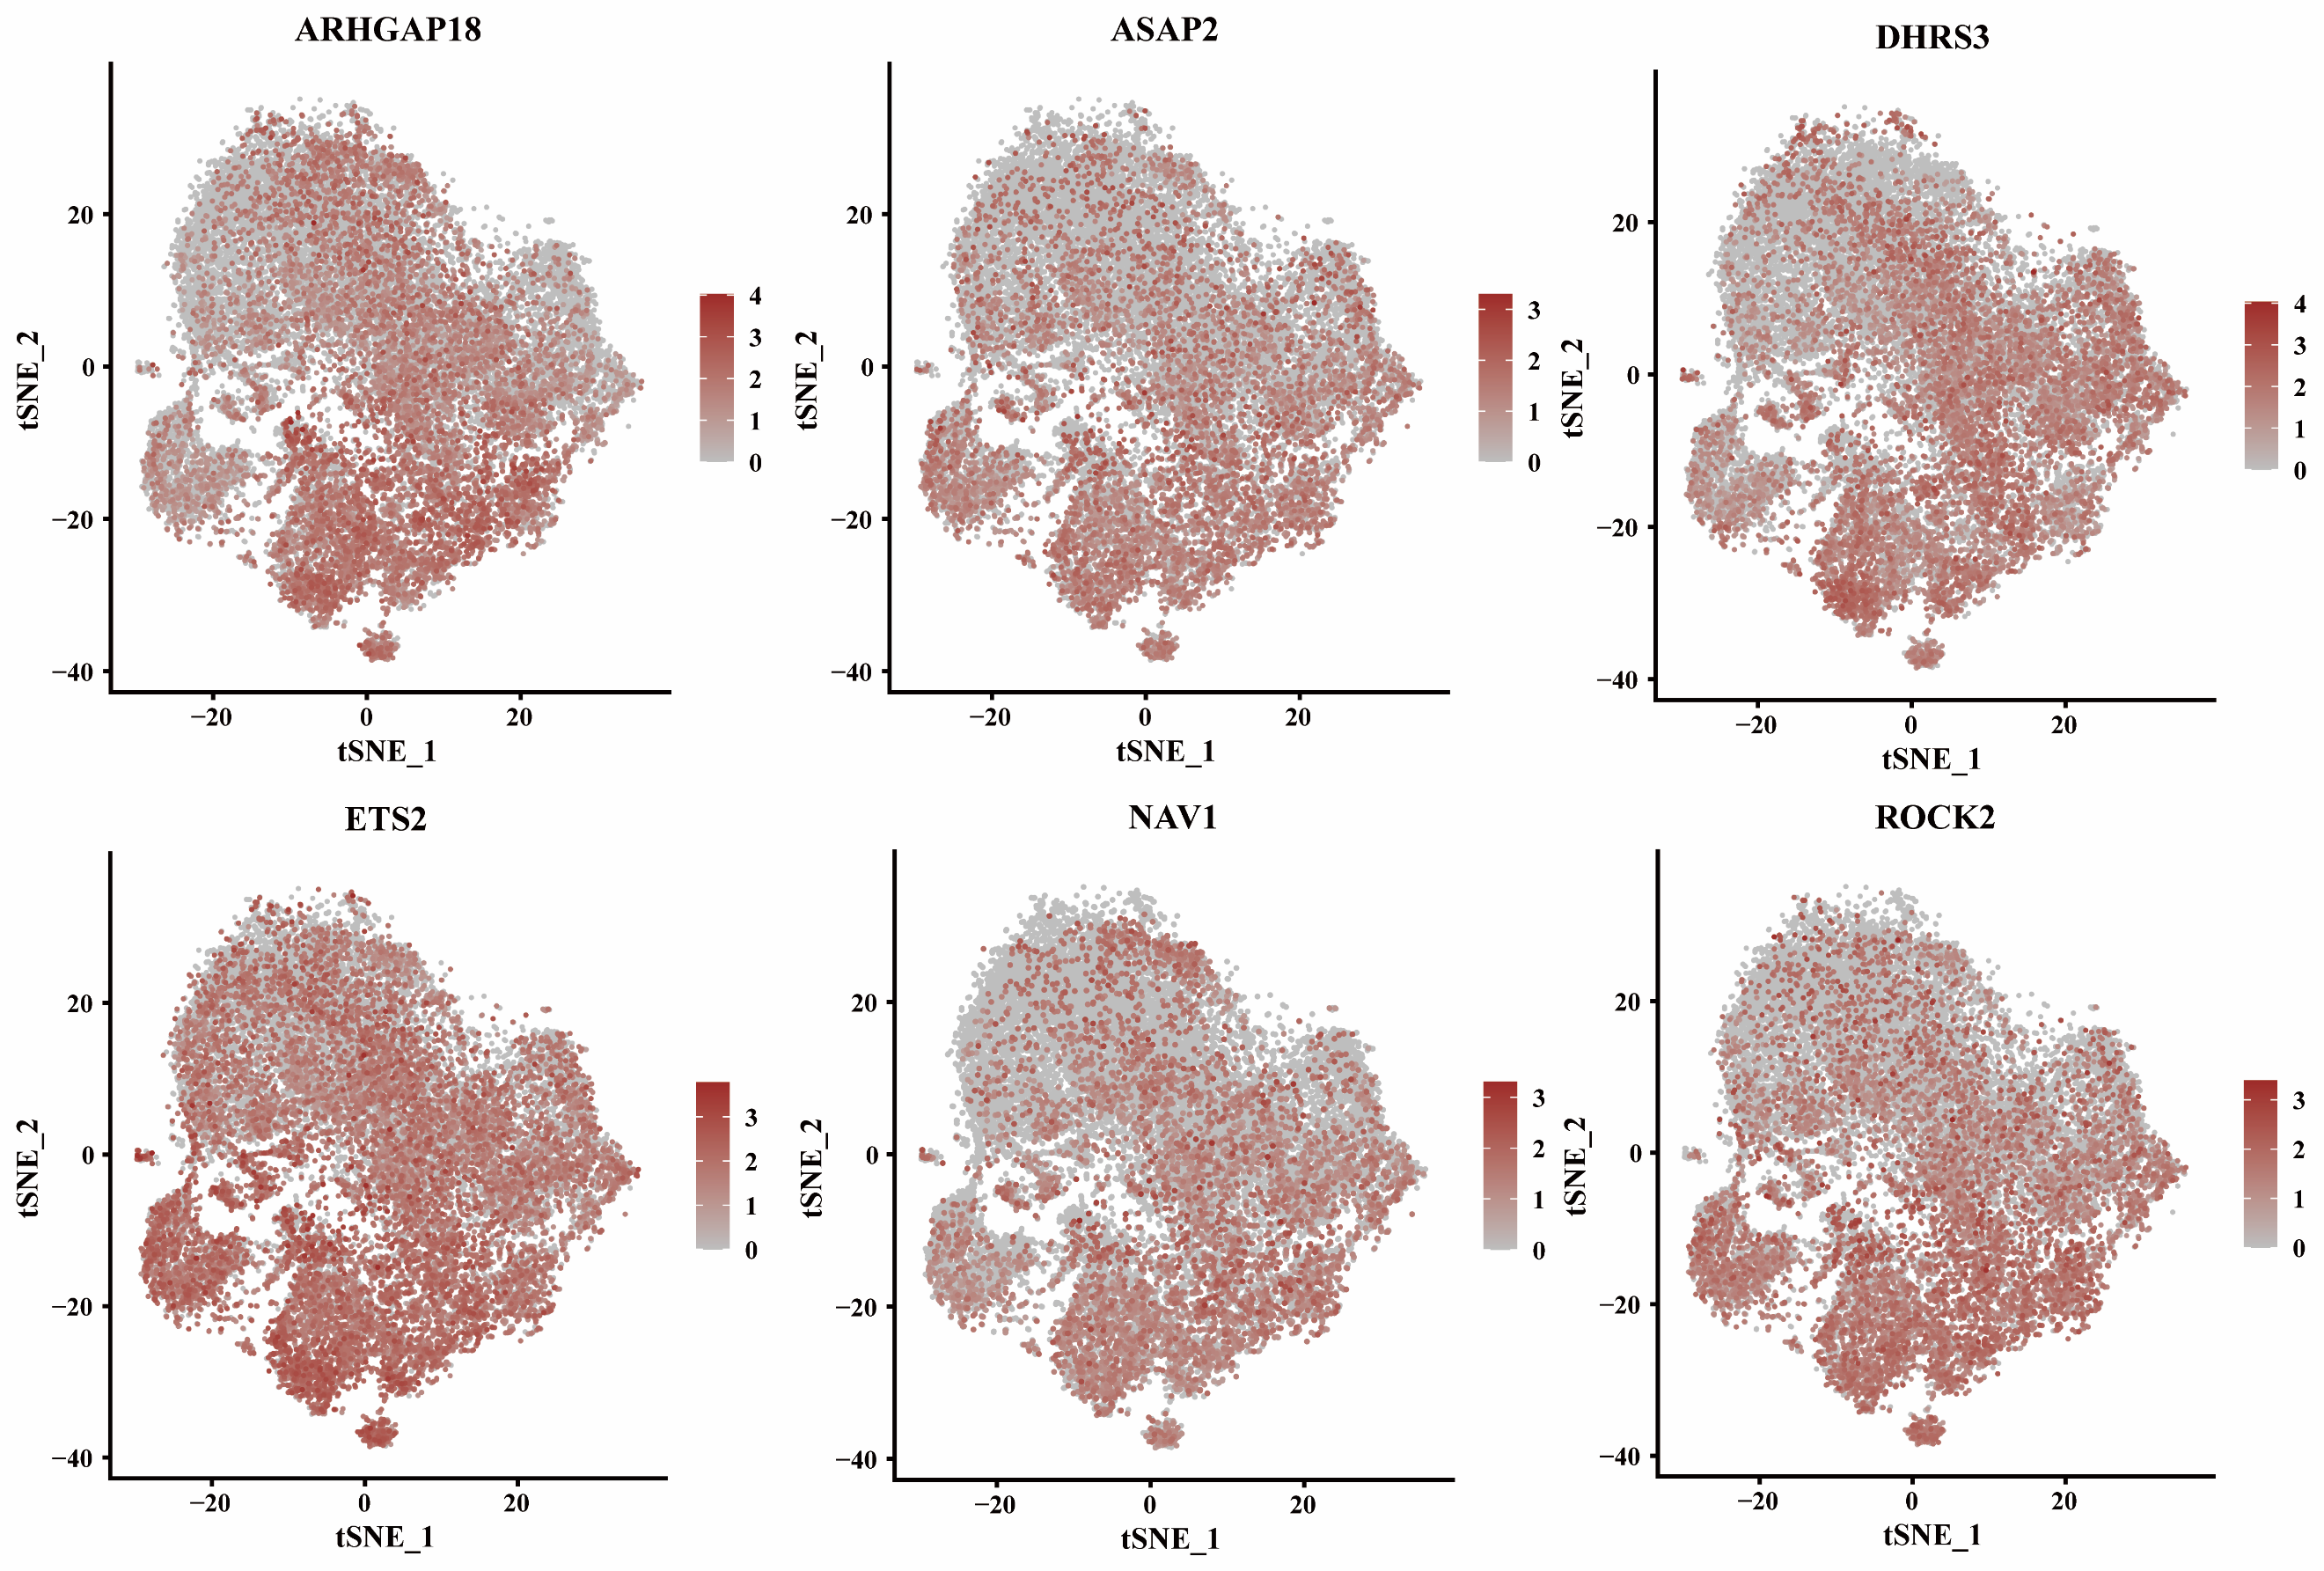


**Figure S12. Supplement to the expression of six key genes in re-cluster UMAP reduction.**


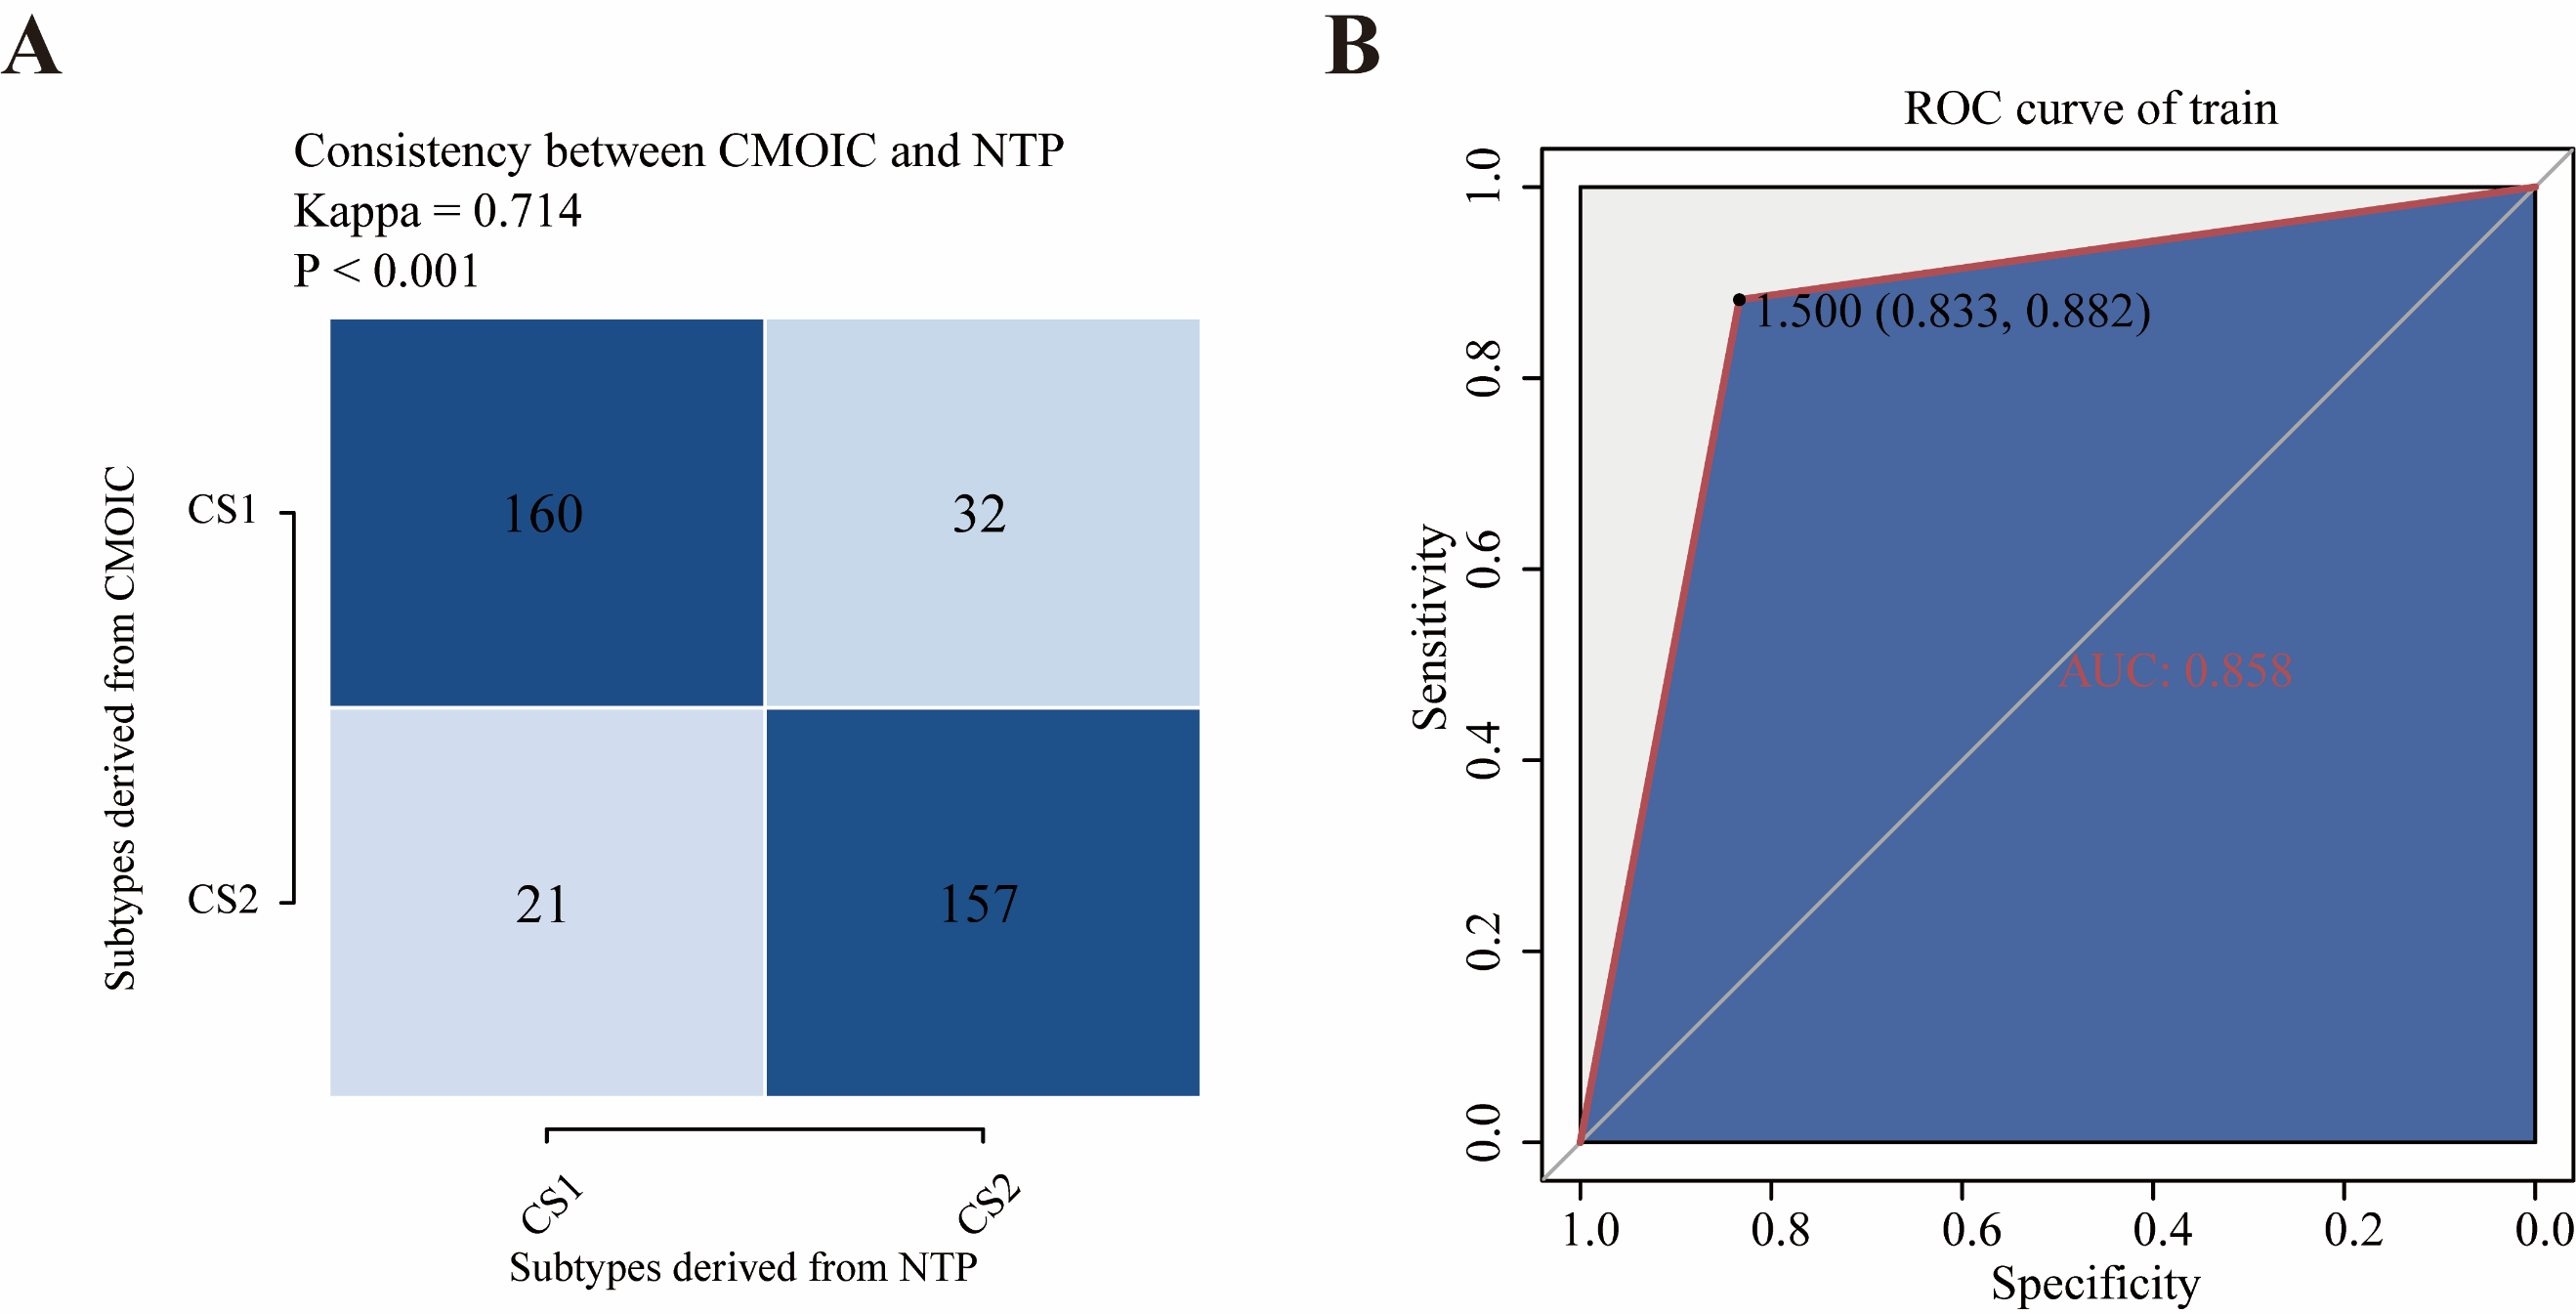


**Figure S13. Supplement to the predictive value of NTP classifier.**


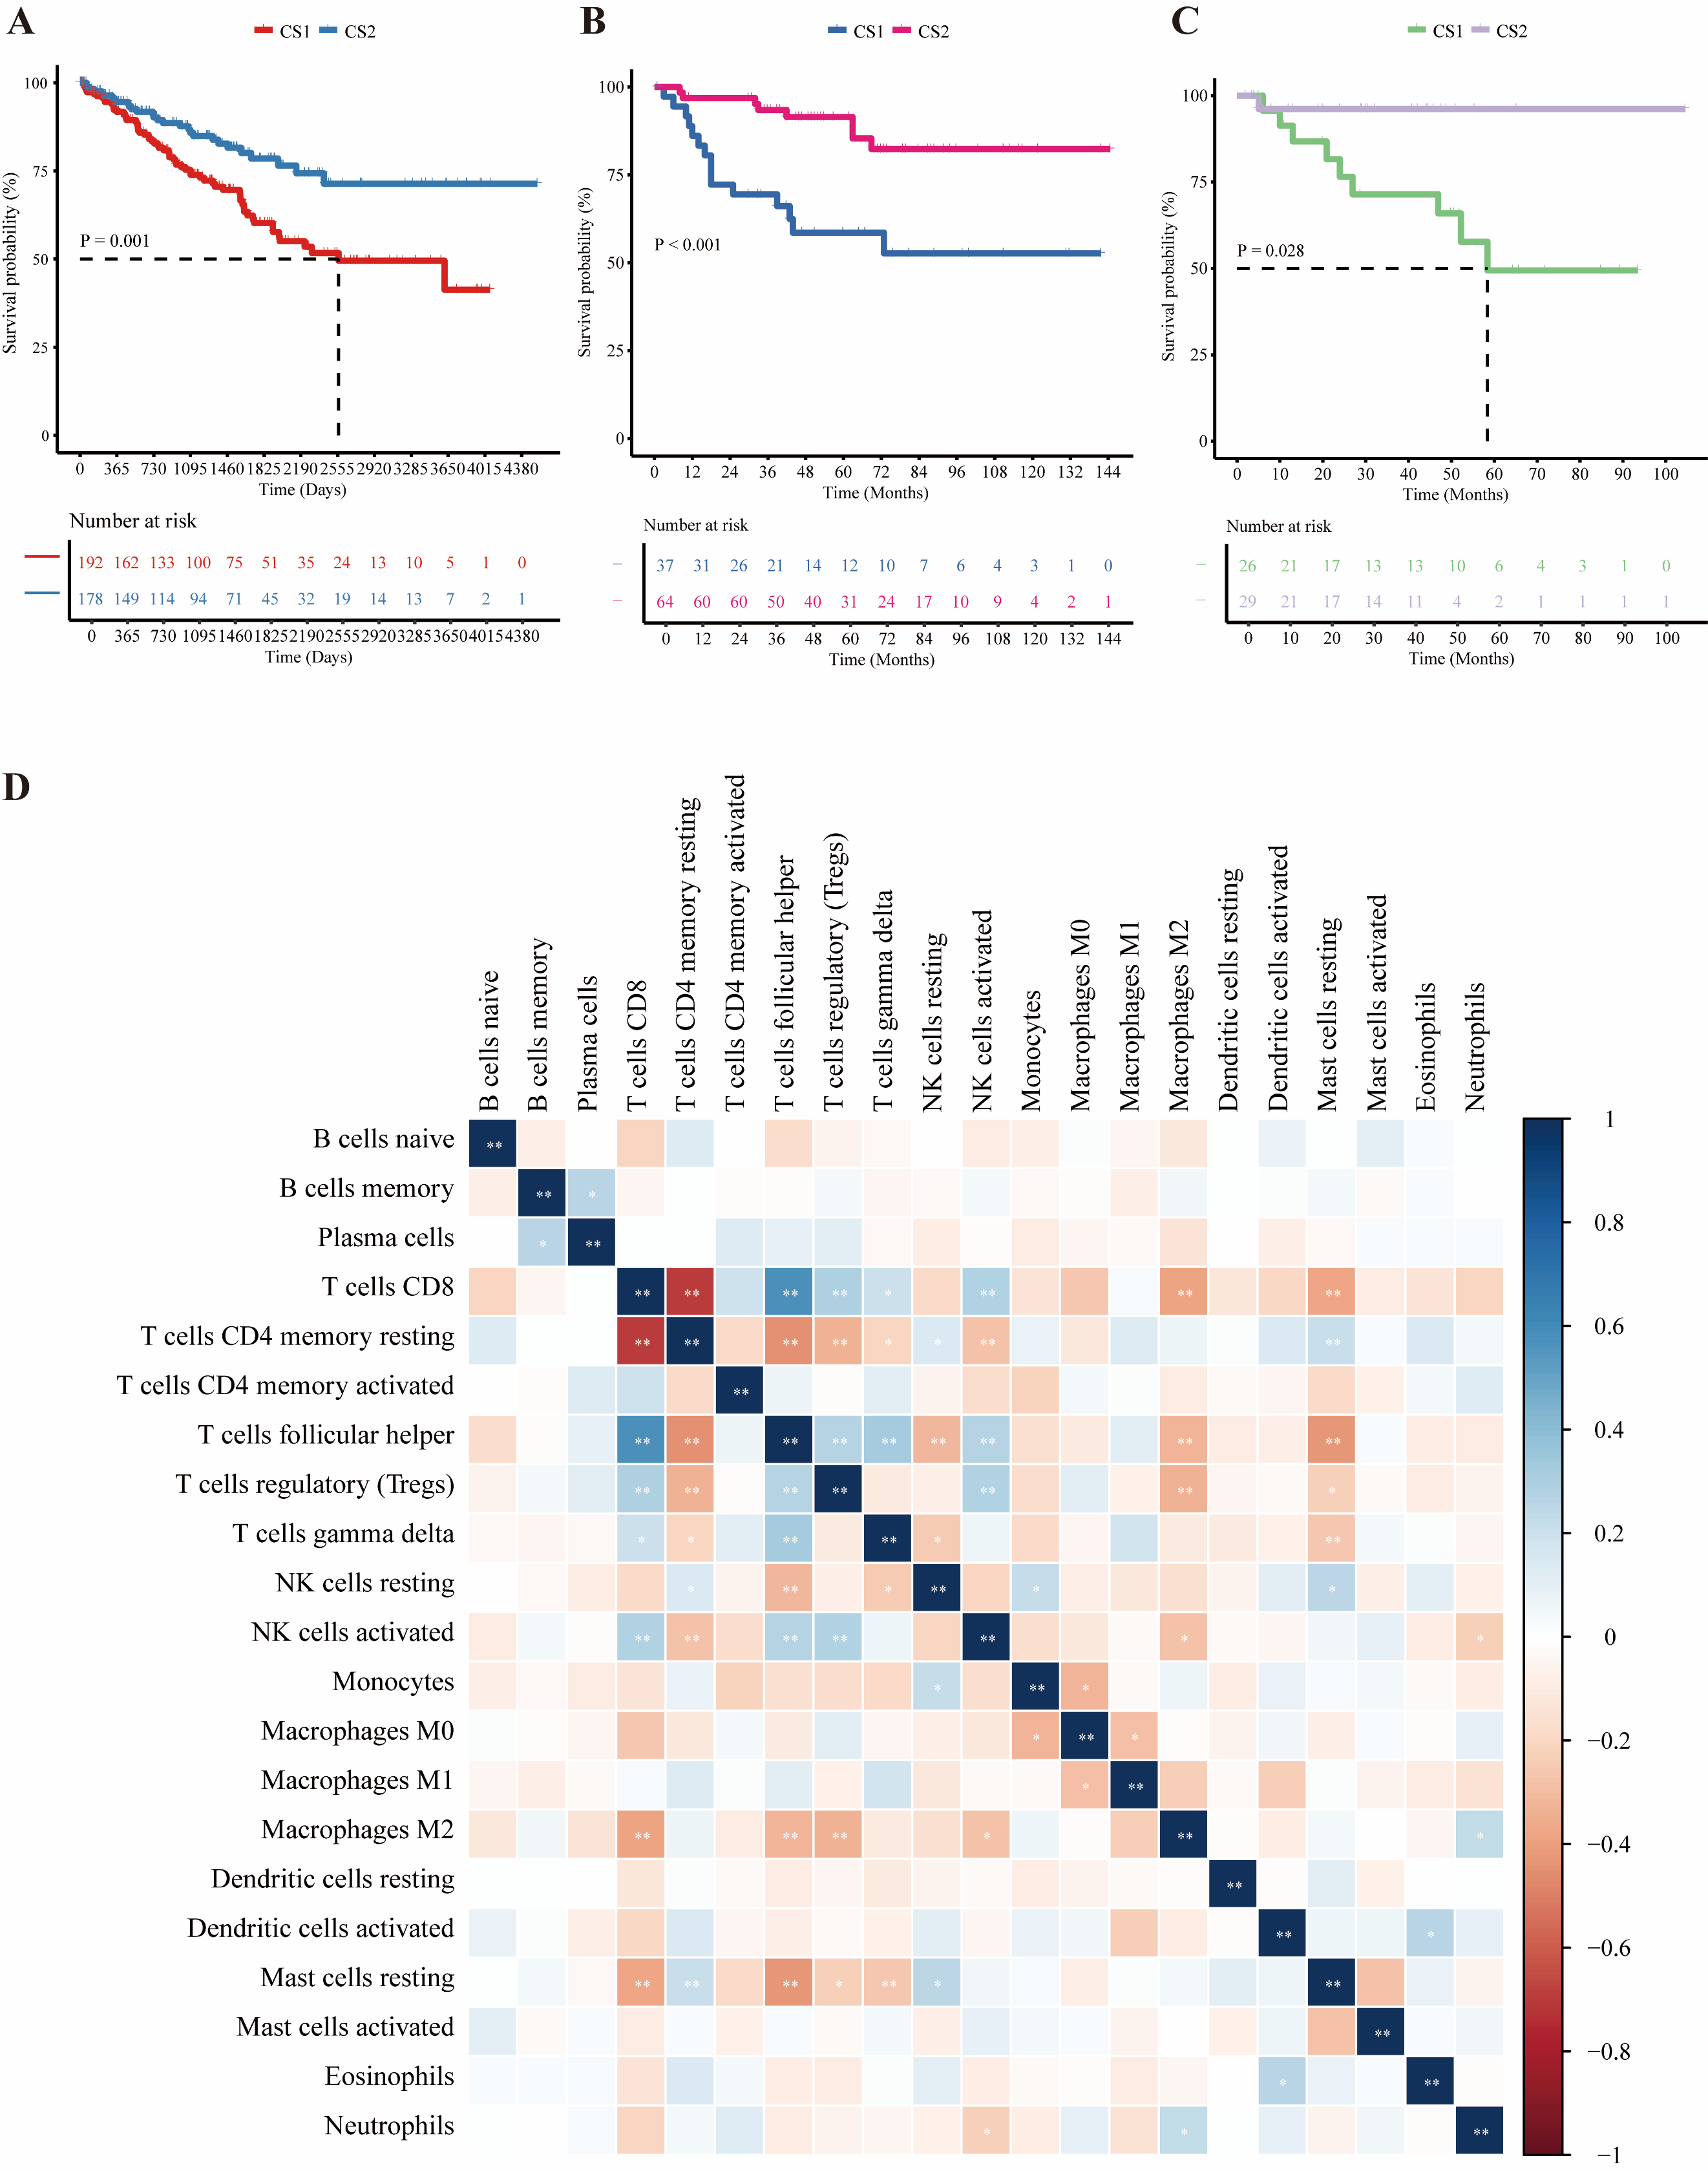


**Figure S14. Supplement to molecular subtypes’ survival analysis and immune infiltration. (A-C)** The KM curve of molecular subtypes. **(D)** The correlation between different immune cell types in CIBERSORT analysis.


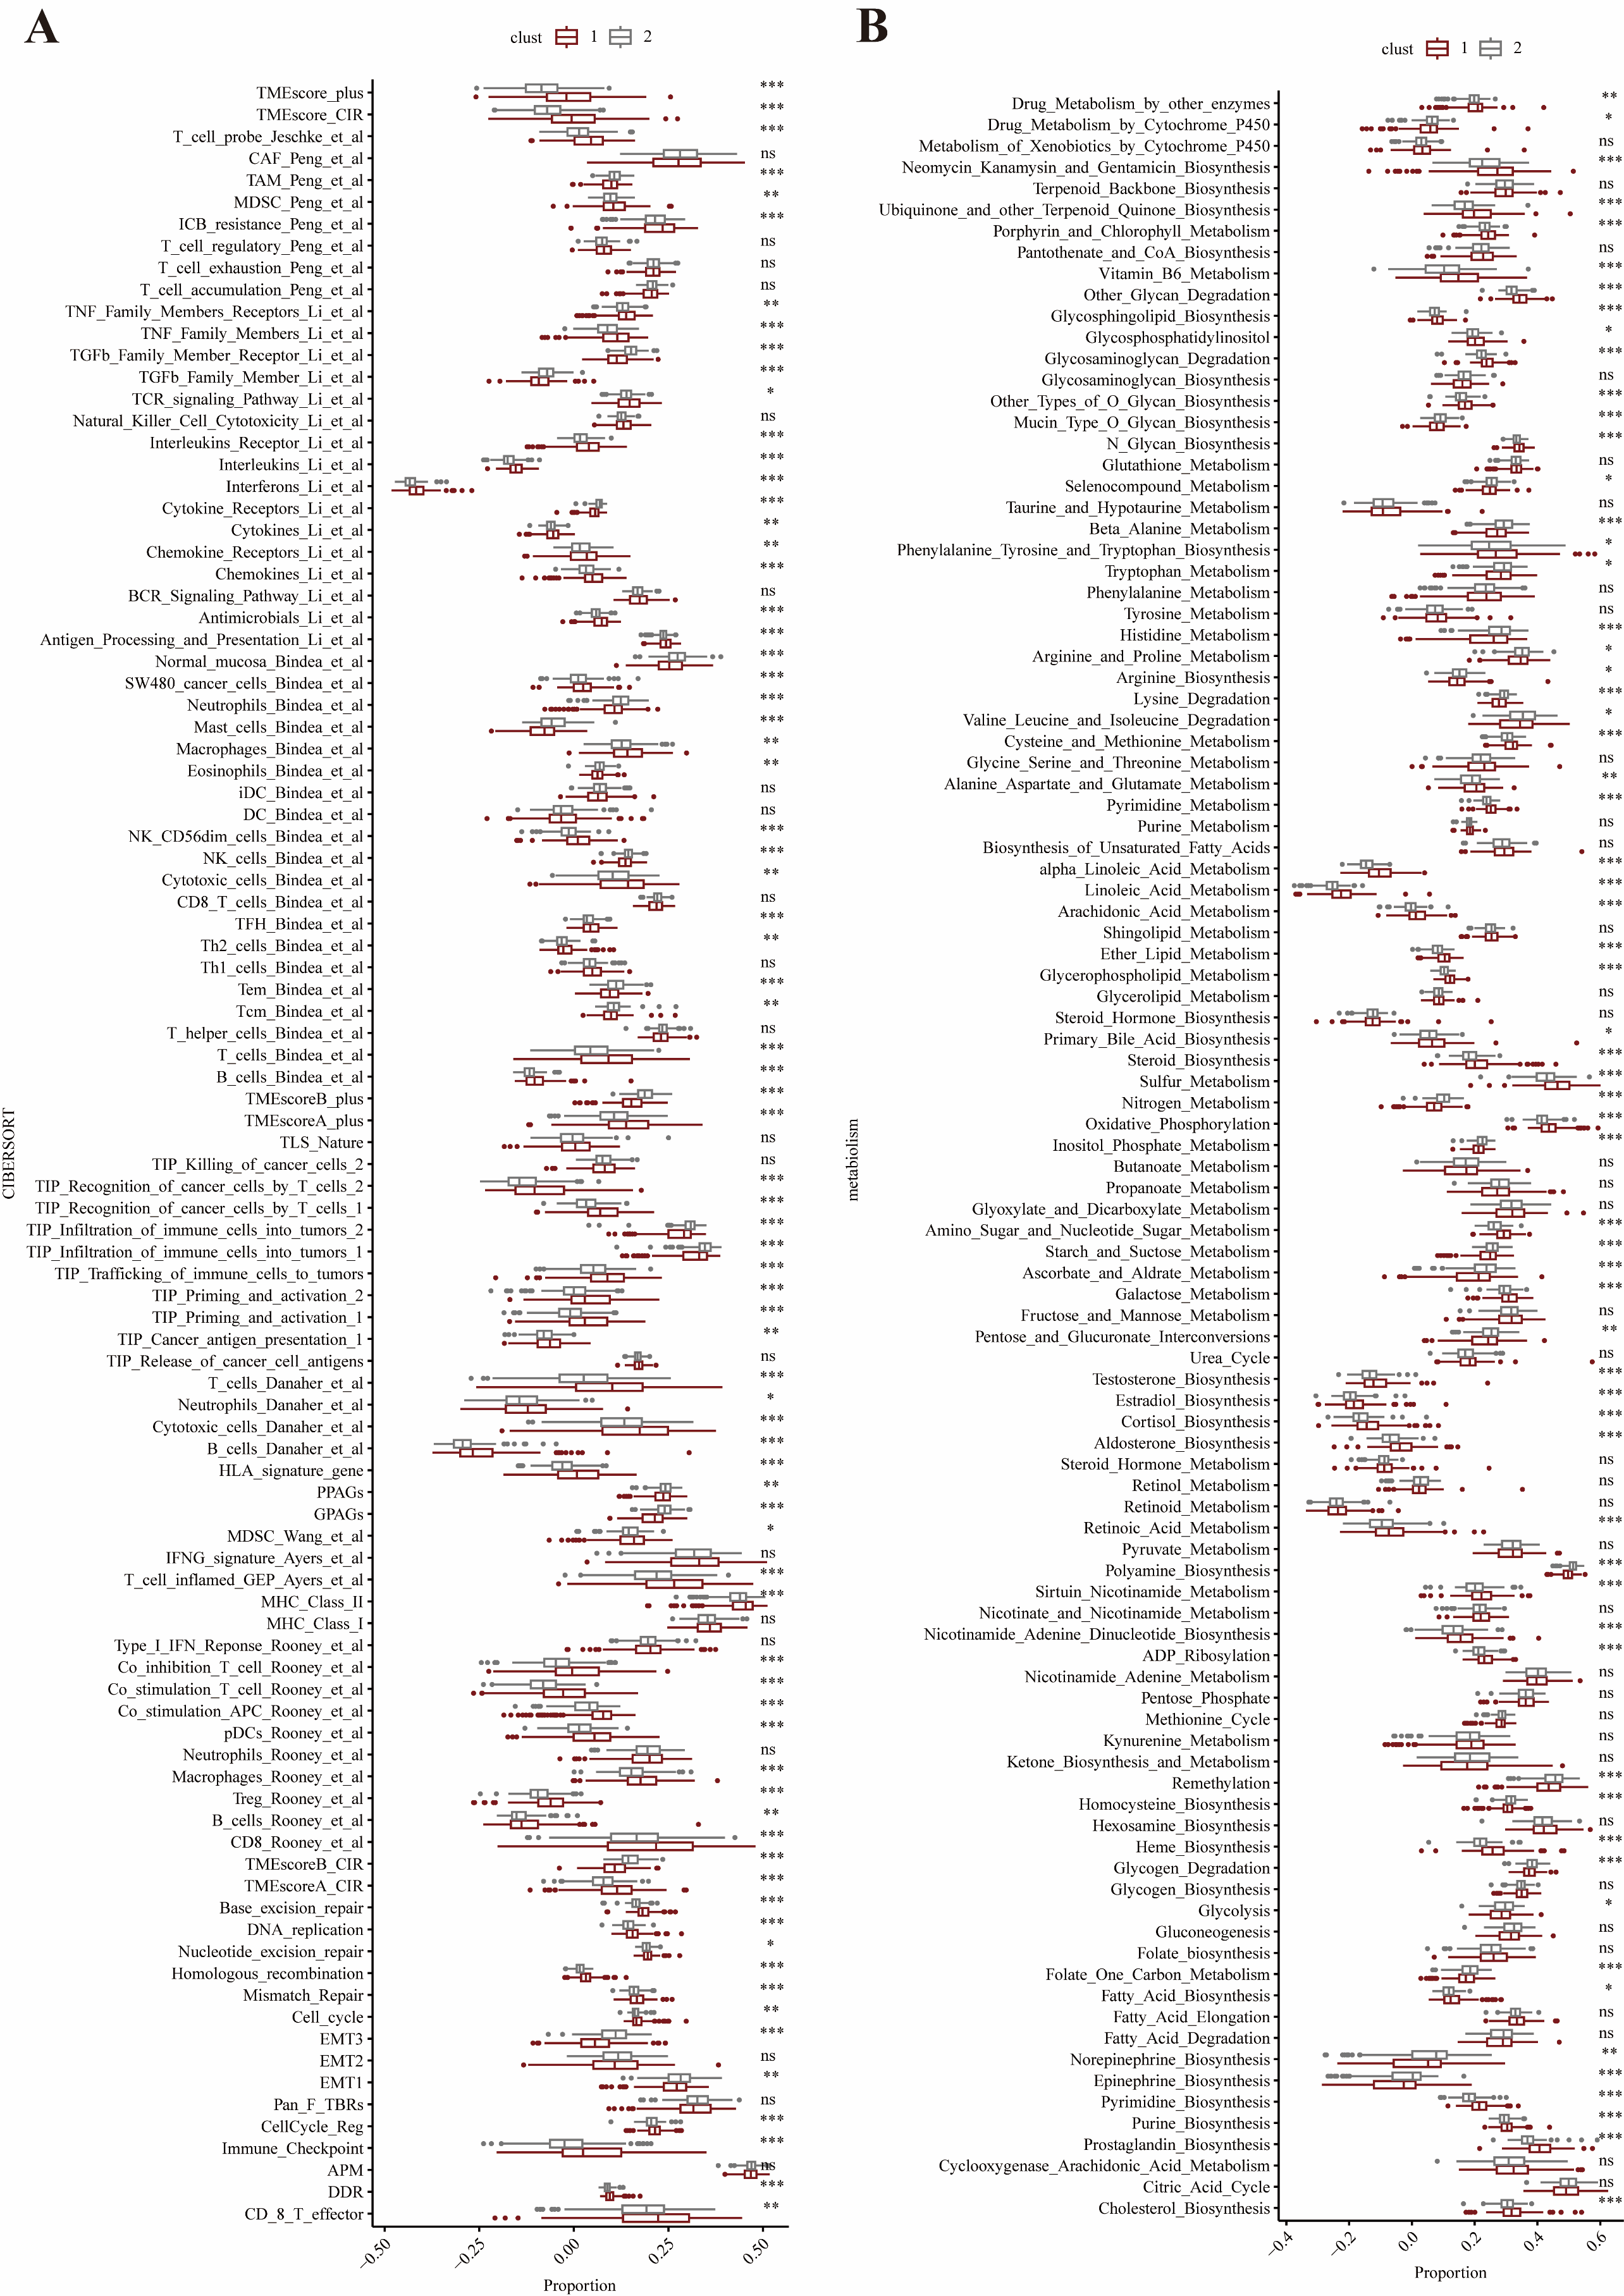


**Figure S15. Supplement to molecular subtypes’ enrichment analysis. (A)** Differences in immune infiltration among molecular subtypes. **(B)** Differences in metabolic infiltration among molecular subtypes.


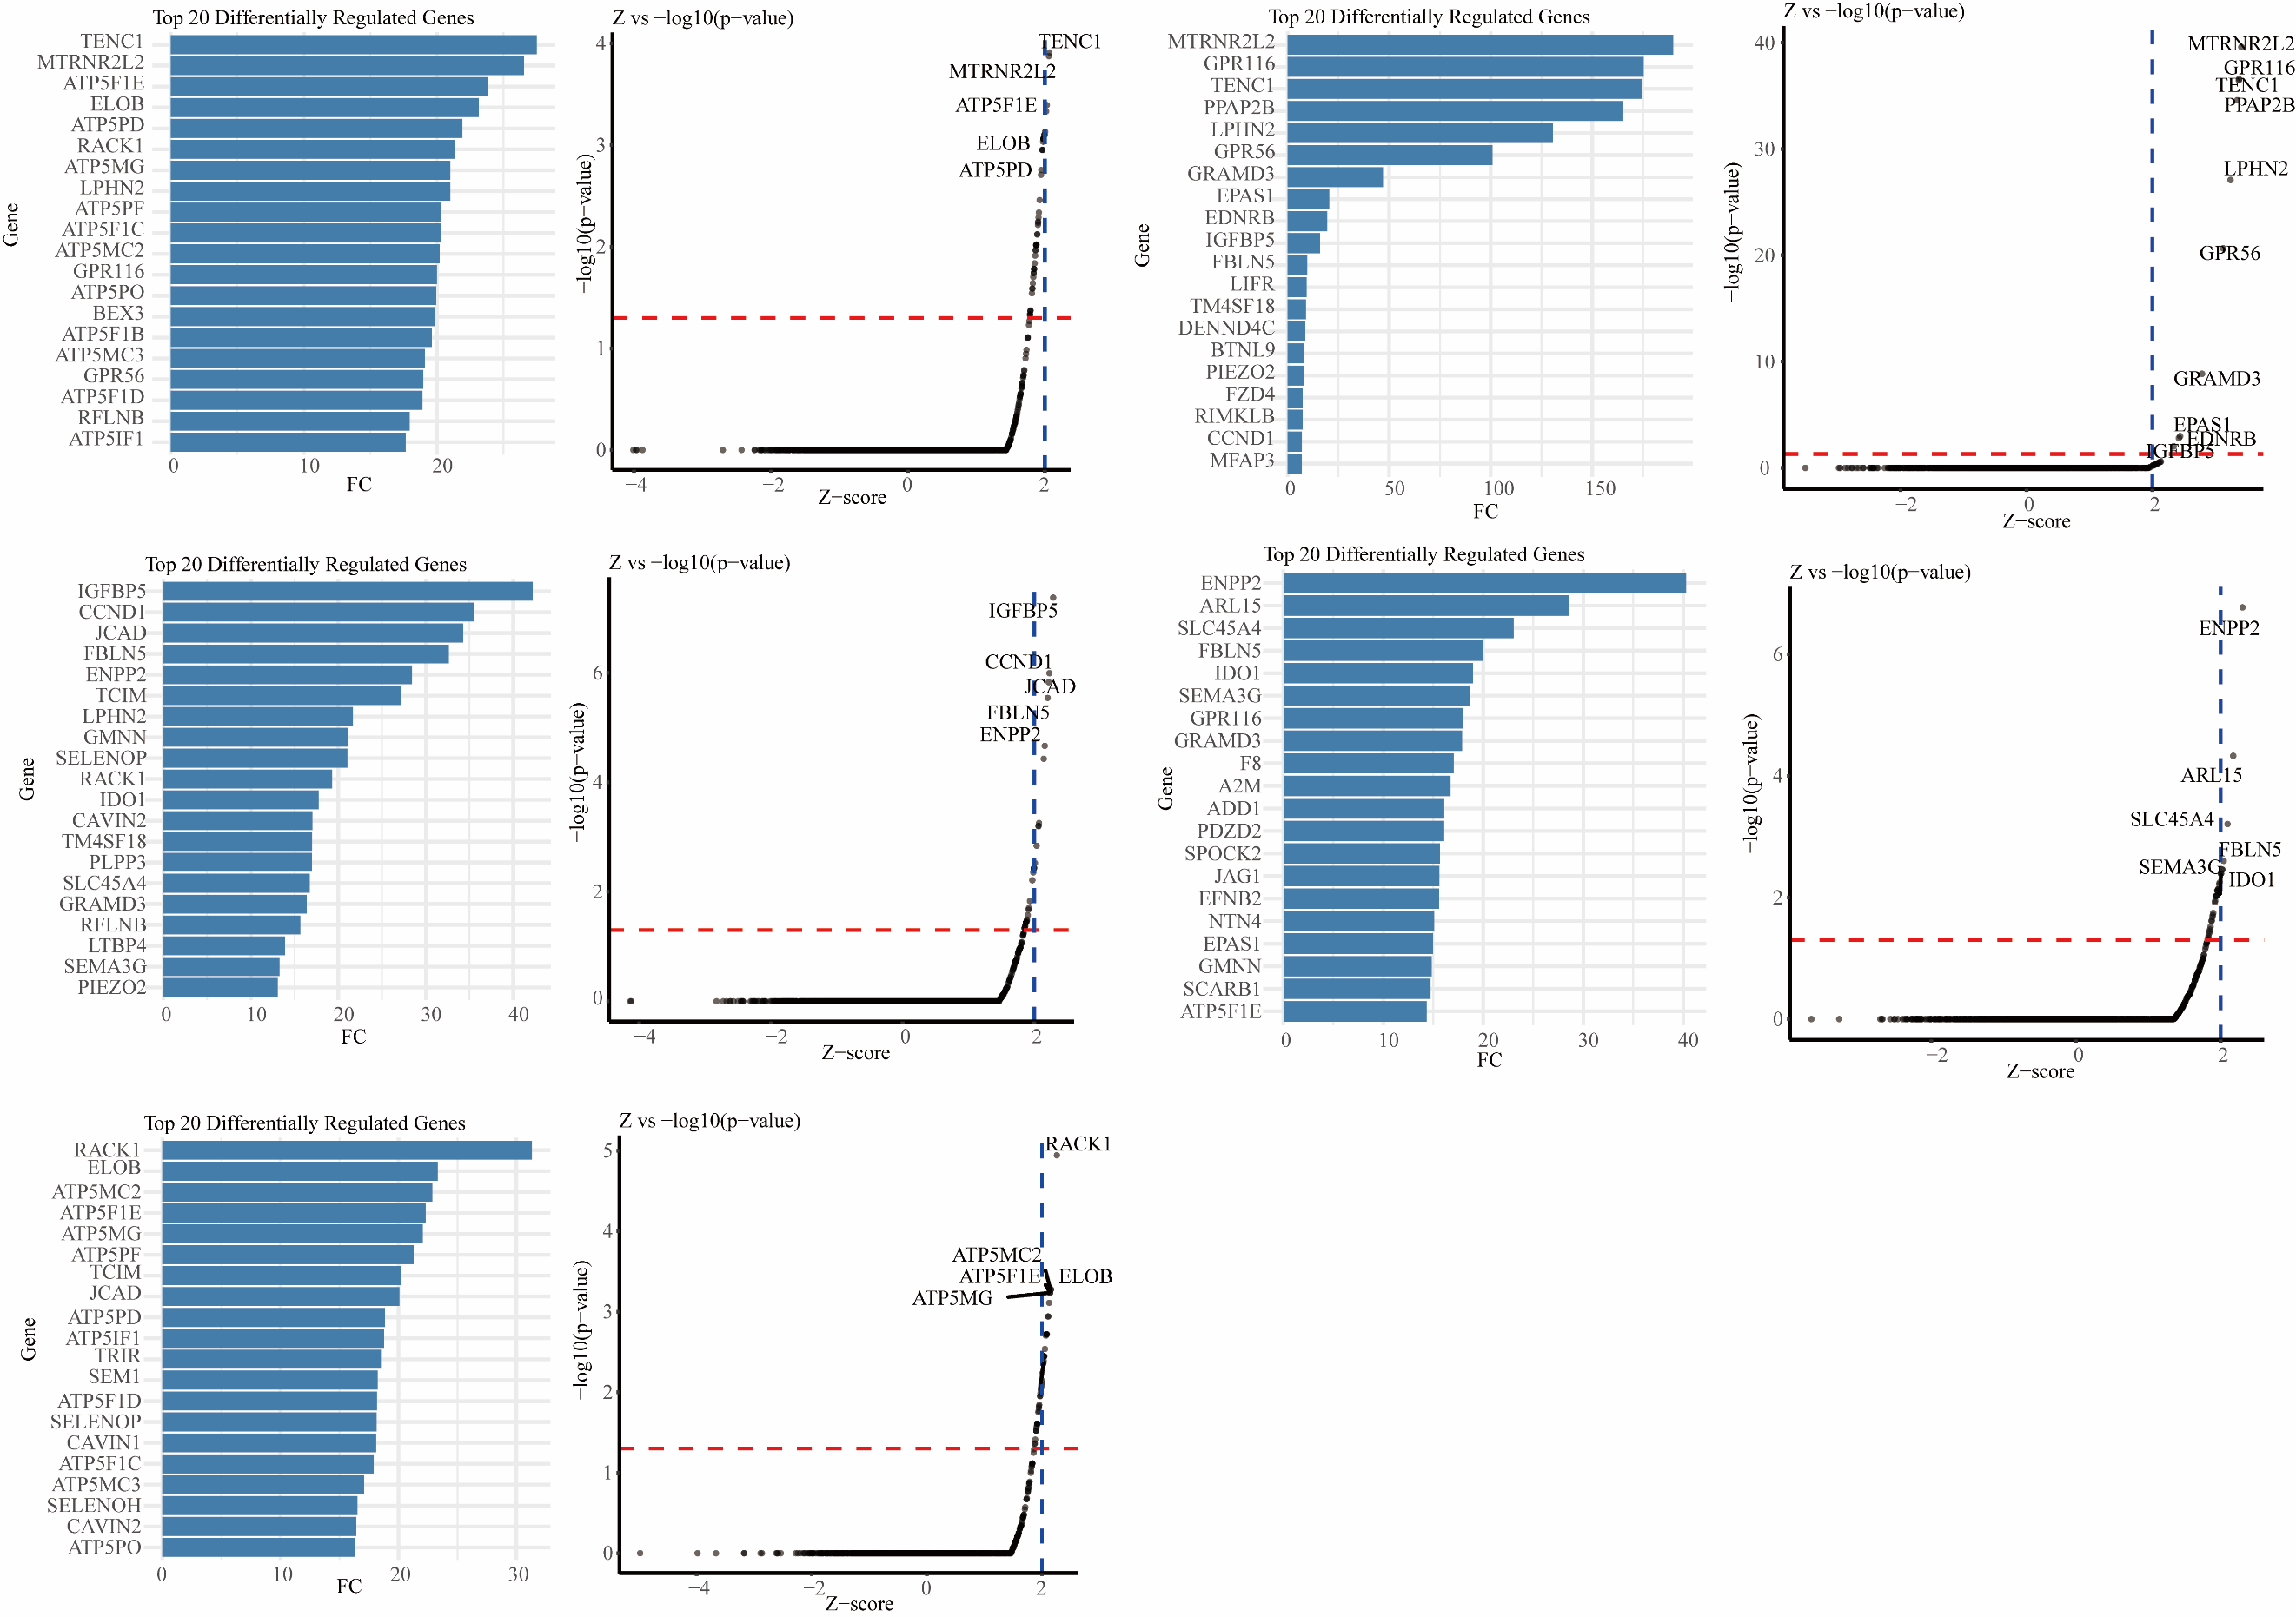
 **Figure S16. Supplement to the virtual knockout of six key genes.**


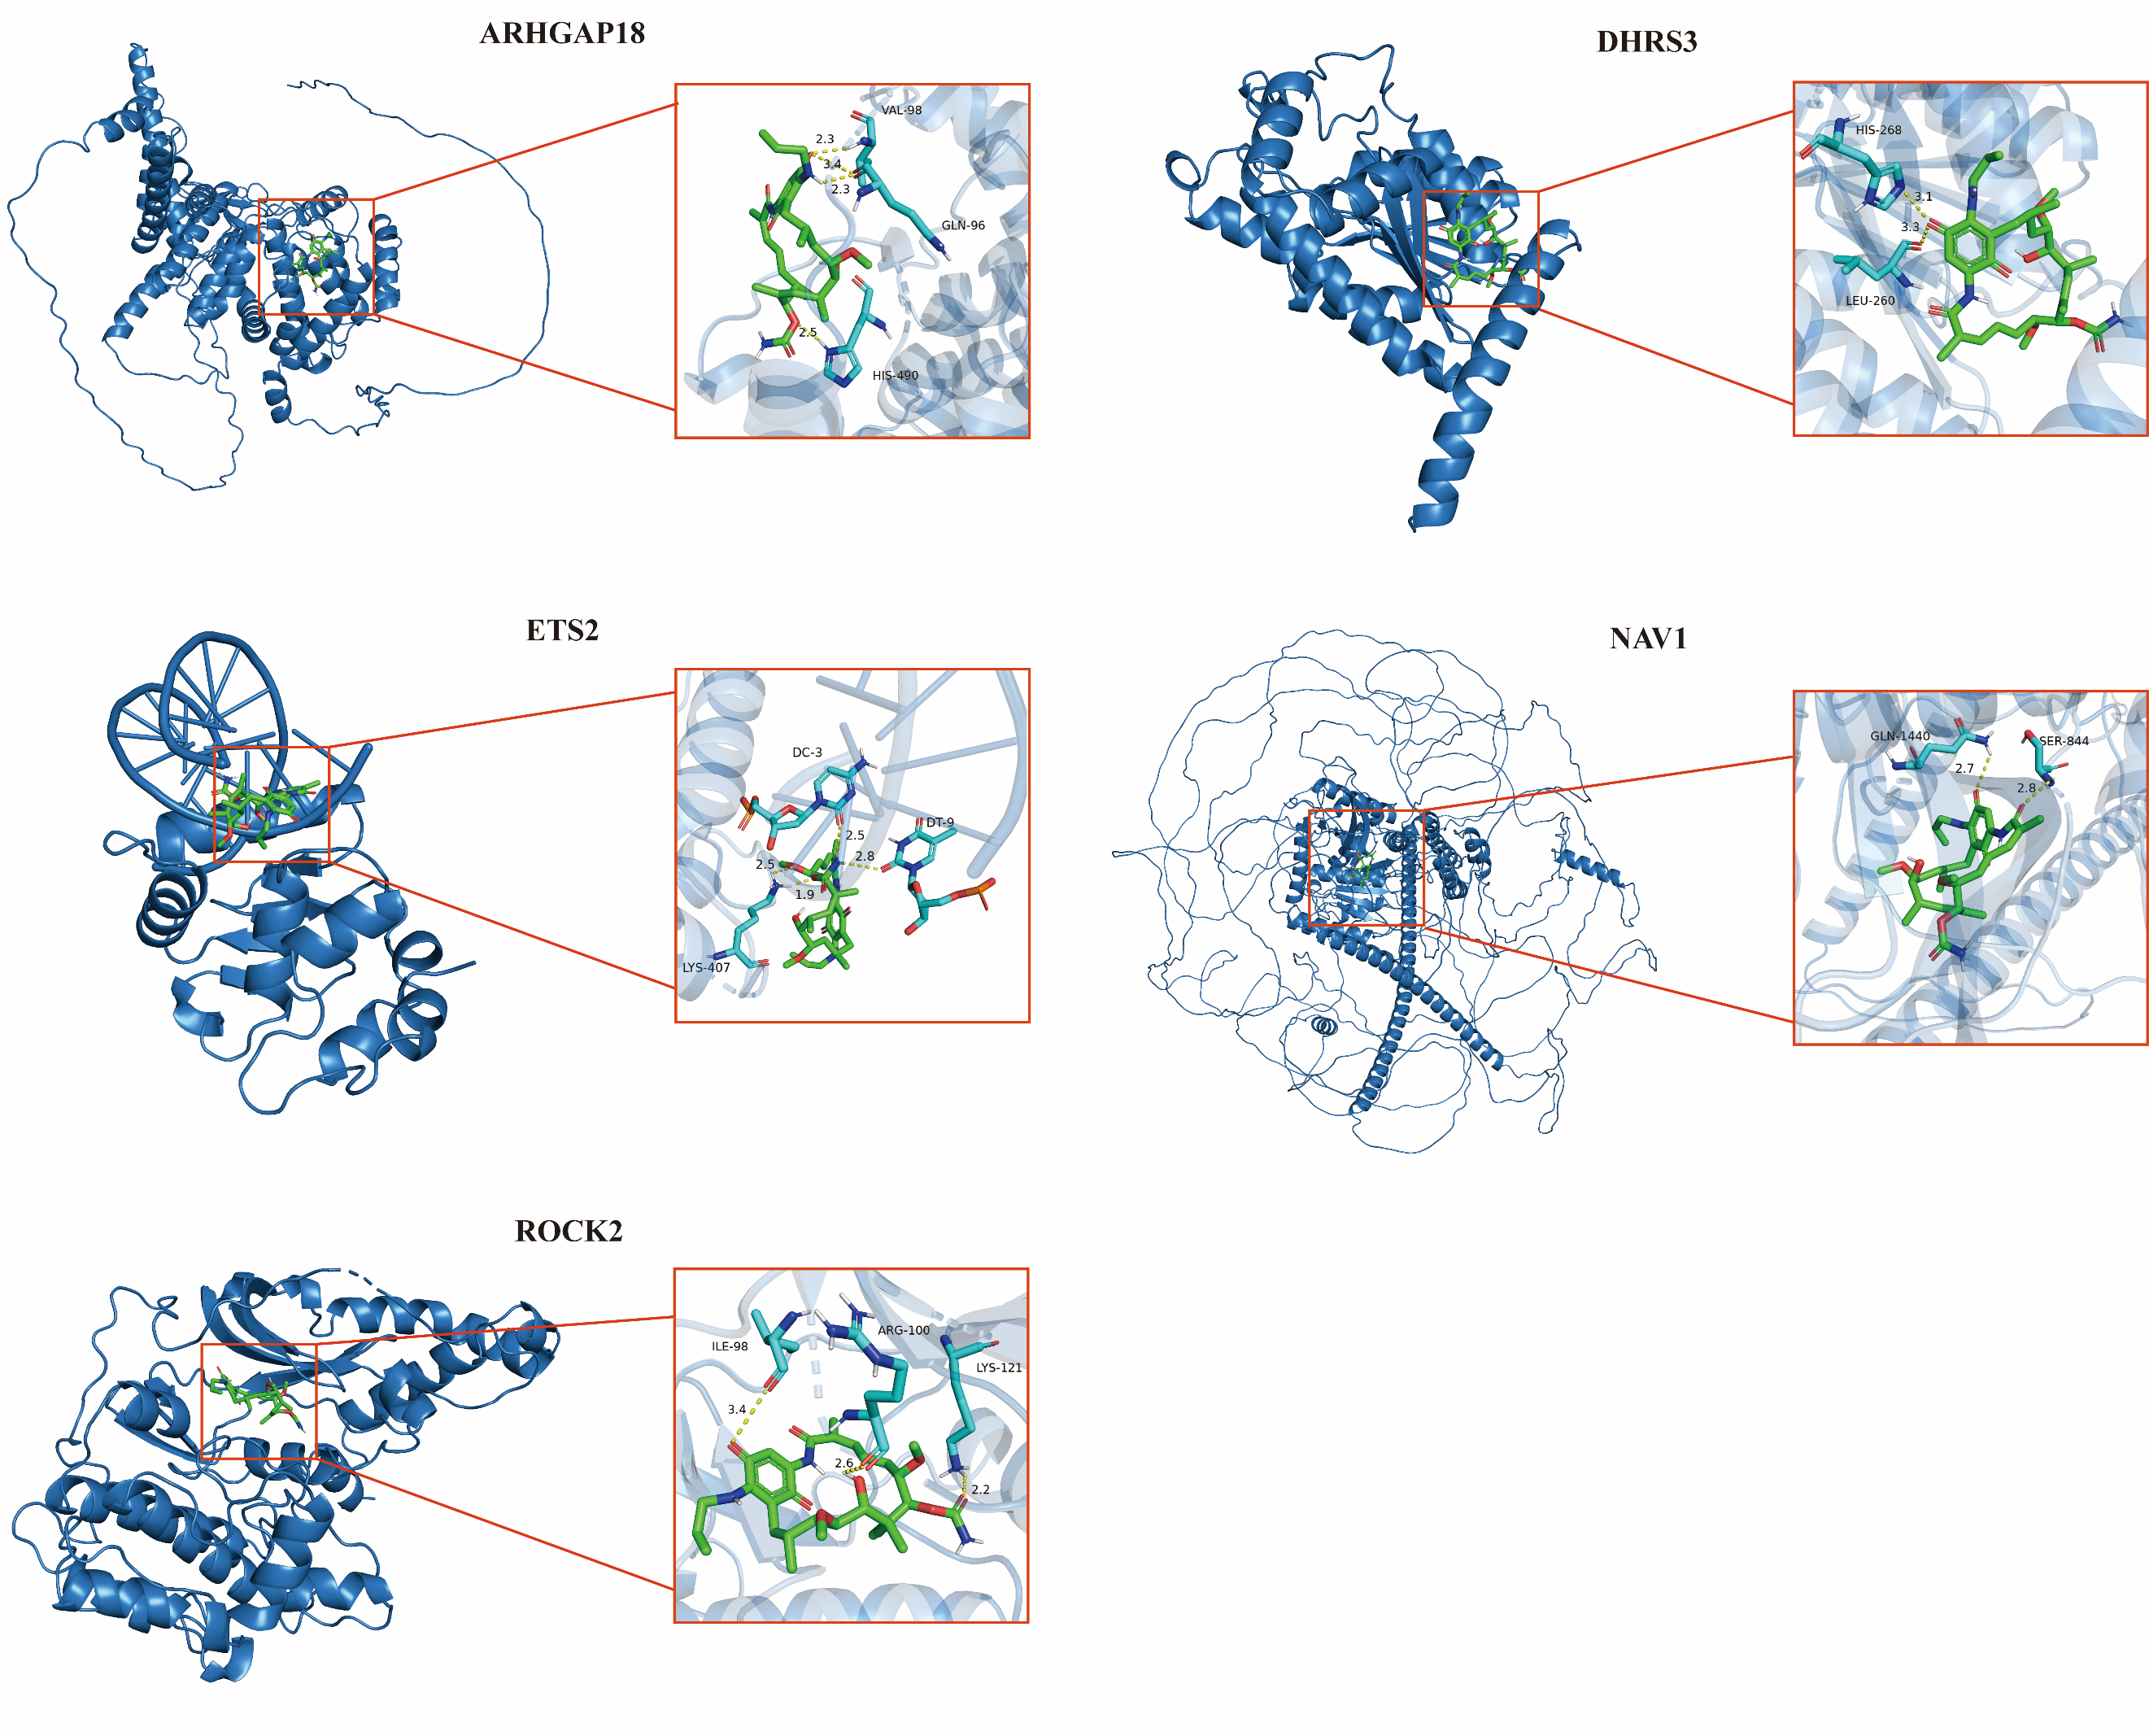
**Figure S17. Supplement to the molecular docking of six key genes.**
