# Supplementary material for: Deep transfer learning in clear cell renal cell carcinoma multi-omics unveils a novel tyrosine kinase inhibitor-tolerant cell subgroup for precision therapy
Source: Research Square preprint supplement (doi:10.21203/rs.3.rs-7796004/v1), 2025-10-22
Supplement: Supplementary file 2 [file a88b1fe838e9813e37723b11.xlsx]

## Sheet: TableS1
Table S1. The TKI drug response data included in this study
Sample	Source	Cell line	Group
GSM1563498	Homo sapiens	786-O	Control
GSM1563499	Homo sapiens	786-O	Control
GSM1563500	Homo sapiens	786-O	Control
GSM1563501	Homo sapiens	786-O	Control
GSM1563502	Homo sapiens	786-O	Control
GSM1563503	Homo sapiens	786-O	Resistant Sorafenib
GSM1563504	Homo sapiens	786-O	Resistant Sorafenib
GSM1563505	Homo sapiens	786-O	Resistant Sorafenib
GSM1563506	Homo sapiens	786-O	Resistant Sorafenib
GSM1563507	Homo sapiens	786-O	Resistant Sorafenib
GSM1563508	Homo sapiens	A498	Resistant Sorafenib
GSM1563509	Homo sapiens	786-O	Control
GSM1563510	Homo sapiens	786-O	Control
GSM1563511	Homo sapiens	786-O	Control
GSM1563512	Homo sapiens	786-O	Control
GSM1563513	Homo sapiens	786-O	Control
GSM1563514	Homo sapiens	786-O	Resistant Sunitinb
GSM1563515	Homo sapiens	786-O	Resistant Sunitinb
GSM1563516	Homo sapiens	786-O	Resistant Sunitinb
GSM1563517	Homo sapiens	786-O	Resistant Sunitinb
GSM1563518	Homo sapiens	A498	Control
GSM1563519	Homo sapiens	A498	Control
GSM1563520	Homo sapiens	A498	Control
GSM1563521	Homo sapiens	A498	Control
GSM1563522	Homo sapiens	A498	Resistant Sorafenib
GSM1563523	Homo sapiens	A498	Resistant Sorafenib
GSM1563524	Homo sapiens	A498	Resistant Sorafenib
GSM1563525	Homo sapiens	A498	Resistant Sorafenib

## Sheet: TableS2
Table S2. The resistant markers
names
JCAD
RFLNB
CAVIN2
TCIM
CAVIN1
ADAMTS5
EXOC3L2
KDR
PIEZO2
SEMA3G
CEACAM1
F8
BTNL9
CASKIN2
UACA
FLT1
JAG2
GJA5
PDGFB
MEIS2
NTN4
ITGA8
EML1
UNC5B
DLL4
ZNF704
GPR116
ENPP2
PLPP3
KCNN3
EFNB2
TMEM150C
ITGA1
PDGFD
SCARB1
FCN3
OSBPL1A
SULF1
GIMAP8
SOX18
HECW2
GPRC5B
RASGRP3
MYO6
PTPRB
RAPGEF2
CHRM3
KCNE3
CXCL12
A2M
ESM1
DGKH
ARL15
CMTM8
TMTC1
ITGB5
UTRN
ROCK2
NRP1
SIPA1L2
IGFBP5
NOTCH1
NES
ADGRF5
ITPRIPL2
RIN2
RASIP1
IL3RA
GNA11
TMEM47
TNFSF10
PTPN14
HEG1
PBX1
ARHGEF15
DHRS3
MYO1C
JAG1
SPRY4
LMO2
RAPGEF4
BMPR2
PLCB1
MCC
HIPK2
PPFIBP1
PODXL
FAM84A
PIK3R3
GJA1
LIMCH1
BCAP29
SNRK
LIMA1
ADD1
LRRC32
GRASP
SHE
CTTNBP2NL
PIK3C2A
VEGFC
MAP4
ARHGAP31
GBP4
ACE
WARS
SHROOM4
SORBS2
PTPN12
CDC42BPA
RAPGEF5
ABCG2
DLC1
ITIH5
CDC42BPB
MMRN2
IDO1
RPS6KA2
ADAMTS1
SPTBN1
LIFR
BTBD3
EVA1B
JAM3
PROS1
UBE2J1
PPAP2B
MATN2
SEMA3F
ARHGEF12
SOX17
MECOM
TGM2
NOTCH4
TEK
THBS1
COL21A1
LAMB2
RFK
ASAP2
KIAA1217
INSR
ST6GALNAC3
HIP1
APP
SLC44A2
FLT4
ECE1
MEF2A
ETS2
DOCK1
TGFBR2
TSPAN7
SEMA6B
ZEB1
ARHGAP18
NETO2
GPR4
TNFAIP1
TM4SF18
NAV1
CYYR1
EDNRB
MPDZ
MYO10
TMEM30A
SERINC3
PHACTR2
ENG
SCARF1
PLPP1
NCKAP1
CLEC14A
SLC44A1
ARHGAP29
COL8A1
PLK2
GIMAP7
CDH5
KLHL5
RUNX1T1
FAM110D
PCDH17
FZD4
FNDC3B
FGD5
PCDH12
TTC28
QKI
EMCN
TMEM184B
RBMS3
NOSTRIN
EPAS1
MYCT1
CLSTN1
PTPRG
PREX2

## Sheet: TableS3
Table S3. The GO pathway enrichment analysis in this study
	ONTOLOGY	ID	Description	GeneRatio	BgRatio	pvalue	p.adjust	qvalue	geneID	Count
GO:0001667	BP	GO:0001667	ameboidal-type cell migration	35/185	496/18614	4.23921e-20	1.29762e-16	9.47352e-17	JCAD/KDR/SEMA3G/CEACAM1/PDGFB/DLL4/ENPP2/PLPP3/EFNB2/SCARB1/SOX18/ROCK2/NRP1/NOTCH1/RIN2/BMPR2/MCC/PIK3R3/GJA1/PIK3C2A/VEGFC/MMRN2/SEMA3F/SOX17/TEK/THBS1/FLT4/DOCK1/TGFBR2/SEMA6B/EDNRB/CLEC14A/PLK2/CDH5/PTPRG	35
GO:0010631	BP	GO:0010631	epithelial cell migration	29/185	371/18614	6.08628e-18	7.72281e-15	5.63817e-15	JCAD/KDR/CEACAM1/PDGFB/DLL4/ENPP2/PLPP3/EFNB2/SCARB1/SOX18/ROCK2/NRP1/NOTCH1/RIN2/BMPR2/MCC/PIK3R3/PIK3C2A/VEGFC/MMRN2/TEK/THBS1/FLT4/DOCK1/TGFBR2/CLEC14A/PLK2/CDH5/PTPRG	29
GO:0090132	BP	GO:0090132	epithelium migration	29/185	374/18614	7.5689e-18	7.72281e-15	5.63817e-15	JCAD/KDR/CEACAM1/PDGFB/DLL4/ENPP2/PLPP3/EFNB2/SCARB1/SOX18/ROCK2/NRP1/NOTCH1/RIN2/BMPR2/MCC/PIK3R3/PIK3C2A/VEGFC/MMRN2/TEK/THBS1/FLT4/DOCK1/TGFBR2/CLEC14A/PLK2/CDH5/PTPRG	29
GO:0090130	BP	GO:0090130	tissue migration	29/185	379/18614	1.08366e-17	8.2927e-15	6.05423e-15	JCAD/KDR/CEACAM1/PDGFB/DLL4/ENPP2/PLPP3/EFNB2/SCARB1/SOX18/ROCK2/NRP1/NOTCH1/RIN2/BMPR2/MCC/PIK3R3/PIK3C2A/VEGFC/MMRN2/TEK/THBS1/FLT4/DOCK1/TGFBR2/CLEC14A/PLK2/CDH5/PTPRG	29
GO:0003158	BP	GO:0003158	endothelium development	19/185	137/18614	1.10891e-16	6.78872e-14	4.95622e-14	KDR/CEACAM1/GJA5/DLL4/SOX18/RAPGEF2/ROCK2/NRP1/NOTCH1/HEG1/JAG1/BMPR2/PLCB1/ADD1/SOX17/NOTCH4/ZEB1/EDNRB/CDH5	19
GO:0043542	BP	GO:0043542	endothelial cell migration	24/185	283/18614	8.62716e-16	4.40129e-13	3.21324e-13	JCAD/KDR/CEACAM1/PDGFB/DLL4/PLPP3/EFNB2/SCARB1/SOX18/ROCK2/NRP1/NOTCH1/RIN2/BMPR2/PIK3R3/PIK3C2A/VEGFC/MMRN2/TEK/THBS1/FLT4/CLEC14A/PLK2/CDH5	24
GO:0010632	BP	GO:0010632	regulation of epithelial cell migration	24/185	295/18614	2.20295e-15	9.6332e-13	7.03289e-13	JCAD/KDR/CEACAM1/PDGFB/DLL4/ENPP2/PLPP3/SCARB1/ROCK2/NRP1/NOTCH1/RIN2/BMPR2/MCC/PIK3C2A/VEGFC/MMRN2/TEK/THBS1/FLT4/DOCK1/TGFBR2/PLK2/PTPRG	24
GO:0045446	BP	GO:0045446	endothelial cell differentiation	17/185	119/18614	2.88946e-15	1.10558e-12	8.07148e-13	KDR/CEACAM1/SOX18/RAPGEF2/ROCK2/NRP1/NOTCH1/HEG1/JAG1/BMPR2/PLCB1/ADD1/SOX17/NOTCH4/ZEB1/EDNRB/CDH5	17
GO:0001570	BP	GO:0001570	vasculogenesis	14/185	83/18614	8.12468e-14	2.76329e-11	2.01739e-11	KDR/CEACAM1/SOX18/RAPGEF2/NRP1/NOTCH1/RIN2/RASIP1/HEG1/SOX17/TGFBR2/ENG/FZD4/QKI	14
GO:0010634	BP	GO:0010634	positive regulation of epithelial cell migration	18/185	176/18614	1.65637e-13	5.07016e-11	3.70156e-11	JCAD/KDR/PDGFB/ENPP2/PLPP3/SCARB1/ROCK2/NRP1/RIN2/BMPR2/PIK3C2A/VEGFC/TEK/THBS1/FLT4/DOCK1/TGFBR2/PLK2	18
GO:0010594	BP	GO:0010594	regulation of endothelial cell migration	19/185	232/18614	1.89557e-12	5.27486e-10	3.851e-10	JCAD/KDR/CEACAM1/PDGFB/DLL4/PLPP3/SCARB1/ROCK2/NRP1/NOTCH1/RIN2/BMPR2/PIK3C2A/VEGFC/MMRN2/TEK/THBS1/FLT4/PLK2	19
GO:0007264	BP	GO:0007264	small GTPase mediated signal transduction	26/185	483/18614	2.2939e-12	5.85135e-10	4.27188e-10	RASGRP3/RAPGEF2/ROCK2/NRP1/SIPA1L2/NOTCH1/RIN2/RASIP1/HEG1/ARHGEF15/SPRY4/RAPGEF4/ARHGAP31/RAPGEF5/DLC1/ARHGEF12/TGM2/DOCK1/ARHGAP18/GPR4/TNFAIP1/NCKAP1/ARHGAP29/PLK2/FGD5/PREX2	26
GO:0043534	BP	GO:0043534	blood vessel endothelial cell migration	17/185	179/18614	2.7008e-12	6.35934e-10	4.64275e-10	JCAD/KDR/PDGFB/DLL4/EFNB2/SCARB1/SOX18/NRP1/NOTCH1/PIK3R3/PIK3C2A/VEGFC/MMRN2/THBS1/CLEC14A/PLK2/CDH5	17
GO:0010595	BP	GO:0010595	positive regulation of endothelial cell migration	15/185	131/18614	3.59888e-12	7.8687e-10	5.74469e-10	JCAD/KDR/PDGFB/PLPP3/SCARB1/ROCK2/NRP1/RIN2/BMPR2/PIK3C2A/VEGFC/TEK/THBS1/FLT4/PLK2	15
GO:0002040	BP	GO:0002040	sprouting angiogenesis	17/185	188/18614	5.98236e-12	1.2208e-09	8.91266e-10	JCAD/KDR/CEACAM1/DLL4/EFNB2/ESM1/NRP1/NOTCH1/PIK3R3/PIK3C2A/VEGFC/MMRN2/TEK/THBS1/FLT4/CLEC14A/PLK2	17
GO:0001945	BP	GO:0001945	lymph vessel development	9/185	31/18614	1.29964e-11	2.48638e-09	1.81523e-09	KDR/EFNB2/SOX18/PTPN14/HEG1/BMPR2/VEGFC/FLT4/CLEC14A	9
GO:0002064	BP	GO:0002064	epithelial cell development	17/185	210/18614	3.52033e-11	6.33866e-09	4.62765e-09	KDR/PDGFB/SOX18/RAPGEF2/ROCK2/NOTCH1/HEG1/JAG1/PLCB1/PODXL/ADD1/NOTCH4/LAMB2/GPR4/EDNRB/CDH5/EPAS1	17
GO:0031589	BP	GO:0031589	cell-substrate adhesion	21/185	359/18614	7.55559e-11	1.28487e-08	9.38043e-09	KDR/PDGFB/NTN4/ITGA8/ITGA1/ITGB5/UTRN/ROCK2/NRP1/NOTCH1/RIN2/JAG1/SPRY4/LIMCH1/DLC1/JAM3/TEK/THBS1/DOCK1/COL8A1/FZD4	21
GO:0050673	BP	GO:0050673	epithelial cell proliferation	24/185	488/18614	1.11683e-10	1.79927e-08	1.31359e-08	JCAD/KDR/CEACAM1/FLT1/PDGFB/DLL4/EFNB2/SCARB1/SULF1/CXCL12/NRP1/IGFBP5/NOTCH1/JAG1/BMPR2/MCC/VEGFC/MMRN2/TEK/THBS1/FLT4/ZEB1/EDNRB/COL8A1	24
GO:0002042	BP	GO:0002042	cell migration involved in sprouting angiogenesis	12/185	96/18614	1.96083e-10	3.00105e-08	2.19097e-08	JCAD/KDR/DLL4/EFNB2/NRP1/NOTCH1/PIK3R3/PIK3C2A/MMRN2/THBS1/CLEC14A/PLK2	12
GO:0010810	BP	GO:0010810	regulation of cell-substrate adhesion	16/185	222/18614	7.60142e-10	1.06614e-07	7.78352e-08	KDR/PDGFB/UTRN/ROCK2/NRP1/NOTCH1/RIN2/JAG1/SPRY4/LIMCH1/DLC1/TEK/THBS1/DOCK1/COL8A1/FZD4	16
GO:0045601	BP	GO:0045601	regulation of endothelial cell differentiation	9/185	47/18614	7.66254e-10	1.06614e-07	7.78352e-08	CEACAM1/ROCK2/NOTCH1/JAG1/PLCB1/ADD1/NOTCH4/ZEB1/CDH5	9
GO:0003007	BP	GO:0003007	heart morphogenesis	17/185	262/18614	1.10706e-09	1.47336e-07	1.07565e-07	ADAMTS5/GJA5/DLL4/SOX18/NRP1/NOTCH1/HEG1/DHRS3/JAG1/BMPR2/DLC1/ADAMTS1/SOX17/TEK/INSR/TGFBR2/ENG	17
GO:0050678	BP	GO:0050678	regulation of epithelial cell proliferation	21/185	419/18614	1.26659e-09	1.61543e-07	1.17937e-07	JCAD/KDR/CEACAM1/FLT1/PDGFB/DLL4/EFNB2/SULF1/CXCL12/NRP1/NOTCH1/JAG1/BMPR2/MCC/VEGFC/MMRN2/TEK/THBS1/FLT4/ZEB1/EDNRB	21
GO:0032835	BP	GO:0032835	glomerulus development	10/185	69/18614	1.50832e-09	1.84679e-07	1.34828e-07	PDGFB/PDGFD/SULF1/NOTCH1/JAG1/PODXL/TEK/LAMB2/GPR4/EDNRB	10
GO:0001935	BP	GO:0001935	endothelial cell proliferation	15/185	201/18614	1.62945e-09	1.91836e-07	1.40053e-07	JCAD/KDR/FLT1/PDGFB/DLL4/SCARB1/SULF1/CXCL12/NRP1/BMPR2/VEGFC/MMRN2/TEK/THBS1/FLT4	15
GO:0001936	BP	GO:0001936	regulation of endothelial cell proliferation	14/185	185/18614	4.85557e-09	5.50478e-07	4.01886e-07	JCAD/KDR/FLT1/PDGFB/DLL4/SULF1/CXCL12/NRP1/BMPR2/VEGFC/MMRN2/TEK/THBS1/FLT4	14
GO:0048010	BP	GO:0048010	vascular endothelial growth factor receptor signaling pathway	9/185	58/18614	5.45152e-09	5.95967e-07	4.35097e-07	KDR/FLT1/SULF1/NRP1/VEGFC/MMRN2/FLT4/CLEC14A/FZD4	9
GO:0048844	BP	GO:0048844	artery morphogenesis	10/185	80/18614	6.64621e-09	7.01519e-07	5.12156e-07	GJA5/DLL4/EFNB2/NRP1/NOTCH1/ADGRF5/JAG1/BMPR2/TGFBR2/ENG	10
GO:0051056	BP	GO:0051056	regulation of small GTPase mediated signal transduction	17/185	298/18614	7.73378e-09	7.89103e-07	5.76099e-07	NRP1/SIPA1L2/NOTCH1/RASIP1/HEG1/ARHGEF15/SPRY4/ARHGAP31/DLC1/ARHGEF12/TGM2/ARHGAP18/GPR4/TNFAIP1/ARHGAP29/FGD5/PREX2	17
GO:0003151	BP	GO:0003151	outflow tract morphogenesis	10/185	82/18614	8.4886e-09	8.38181e-07	6.11929e-07	GJA5/SOX18/NRP1/NOTCH1/DHRS3/JAG1/BMPR2/SOX17/TGFBR2/ENG	10
GO:0003018	BP	GO:0003018	vascular process in circulatory system	16/185	265/18614	9.77144e-09	9.34699e-07	6.82393e-07	CEACAM1/GJA5/ITGA1/CHRM3/ROCK2/BMPR2/PIK3C2A/ACE/ABCG2/TEK/INSR/ECE1/GPR4/EDNRB/SLC44A1/CDH5	16
GO:0001885	BP	GO:0001885	endothelial cell development	9/185	63/18614	1.16103e-08	1.07694e-06	7.86239e-07	SOX18/RAPGEF2/ROCK2/HEG1/PLCB1/ADD1/NOTCH4/EDNRB/CDH5	9
GO:0001822	BP	GO:0001822	kidney development	17/185	310/18614	1.38967e-08	1.25111e-06	9.13394e-07	PDGFB/ITGA8/EFNB2/PDGFD/SULF1/NRP1/NOTCH1/PBX1/JAG1/PODXL/ACE/ADAMTS1/SOX17/TEK/LAMB2/GPR4/EDNRB	17
GO:0001946	BP	GO:0001946	lymphangiogenesis	6/185	18/18614	1.49392e-08	1.30654e-06	9.53864e-07	SOX18/PTPN14/BMPR2/VEGFC/FLT4/CLEC14A	6
GO:1905314	BP	GO:1905314	semi-lunar valve development	8/185	47/18614	1.84742e-08	1.57082e-06	1.14681e-06	ADAMTS5/GJA5/DLL4/ROCK2/NOTCH1/JAG1/BMPR2/TGFBR2	8
GO:0034329	BP	GO:0034329	cell junction assembly	20/185	444/18614	1.94416e-08	1.6084e-06	1.17424e-06	KDR/GJA5/EFNB2/RAPGEF2/ROCK2/NRP1/ARHGEF15/MYO1C/GJA1/LIMCH1/ACE/DLC1/JAM3/TEK/THBS1/APP/MPDZ/CDH5/PCDH17/CLSTN1	20
GO:0072001	BP	GO:0072001	renal system development	17/185	320/18614	2.21843e-08	1.78701e-06	1.30463e-06	PDGFB/ITGA8/EFNB2/PDGFD/SULF1/NRP1/NOTCH1/PBX1/JAG1/PODXL/ACE/ADAMTS1/SOX17/TEK/LAMB2/GPR4/EDNRB	17
GO:0072089	BP	GO:0072089	stem cell proliferation	11/185	121/18614	3.43056e-08	2.69255e-06	1.96574e-06	KDR/SOX18/NOTCH1/NES/PBX1/GJA1/VEGFC/ACE/SOX17/MECOM/TGFBR2	11
GO:0007265	BP	GO:0007265	Ras protein signal transduction	17/185	333/18614	3.97038e-08	3.03833e-06	2.21819e-06	RASGRP3/RAPGEF2/ROCK2/NRP1/NOTCH1/RASIP1/HEG1/SPRY4/RAPGEF4/RAPGEF5/DLC1/ARHGEF12/GPR4/TNFAIP1/NCKAP1/ARHGAP29/PLK2	17
GO:0035924	BP	GO:0035924	cellular response to vascular endothelial growth factor stimulus	9/185	74/18614	4.93626e-08	3.68534e-06	2.69054e-06	JCAD/KDR/FLT1/DLL4/NRP1/NOTCH1/MYO1C/VEGFC/FLT4	9
GO:0003206	BP	GO:0003206	cardiac chamber morphogenesis	11/185	126/18614	5.22931e-08	3.81117e-06	2.78241e-06	DLL4/NRP1/NOTCH1/HEG1/DHRS3/JAG1/BMPR2/ADAMTS1/TEK/TGFBR2/ENG	11
GO:0040013	BP	GO:0040013	negative regulation of locomotion	19/185	427/18614	5.45552e-08	3.88357e-06	2.83527e-06	SEMA3G/DLL4/SULF1/CXCL12/NRP1/IGFBP5/NOTCH1/JAG1/PLCB1/MCC/GJA1/LIMCH1/DLC1/MMRN2/SEMA3F/THBS1/SEMA6B/ENG/PTPRG	19
GO:0090287	BP	GO:0090287	regulation of cellular response to growth factor stimulus	17/185	345/18614	6.63198e-08	4.61374e-06	3.36835e-06	JCAD/KDR/ITGA8/SULF1/NRP1/NOTCH1/MYO1C/SPRY4/BMPR2/HIPK2/VEGFC/MMRN2/THBS1/ZEB1/ENG/CDH5/FZD4	17
GO:0050920	BP	GO:0050920	regulation of chemotaxis	14/185	230/18614	7.67538e-08	5.0999e-06	3.72327e-06	KDR/SEMA3G/PDGFB/EFNB2/PDGFD/CXCL12/NRP1/NOTCH1/BMPR2/VEGFC/JAM3/SEMA3F/THBS1/SEMA6B	14
GO:0036303	BP	GO:0036303	lymph vessel morphogenesis	6/185	23/18614	7.79477e-08	5.0999e-06	3.72327e-06	SOX18/PTPN14/BMPR2/VEGFC/FLT4/CLEC14A	6
GO:0045765	BP	GO:0045765	regulation of angiogenesis	17/185	349/18614	7.83062e-08	5.0999e-06	3.72327e-06	JCAD/KDR/CEACAM1/FLT1/SULF1/ROCK2/NRP1/HIPK2/VEGFC/ADAMTS1/TEK/THBS1/TGFBR2/GPR4/ENG/PLK2/CDH5	17
GO:0007015	BP	GO:0007015	actin filament organization	19/185	442/18614	9.36988e-08	5.97525e-06	4.36234e-06	RFLNB/MYO6/CXCL12/ITGB5/ROCK2/NRP1/ARHGEF15/MYO1C/LIMCH1/LIMA1/ADD1/SHROOM4/DLC1/SPTBN1/HIP1/ARHGAP18/TNFAIP1/NCKAP1/NOSTRIN	19
GO:0090049	BP	GO:0090049	regulation of cell migration involved in sprouting angiogenesis	9/185	80/18614	9.84069e-08	6.12377e-06	4.47076e-06	JCAD/KDR/DLL4/NRP1/NOTCH1/PIK3C2A/MMRN2/THBS1/PLK2	9
GO:1901342	BP	GO:1901342	regulation of vasculature development	17/185	355/18614	1.00029e-07	6.12377e-06	4.47076e-06	JCAD/KDR/CEACAM1/FLT1/SULF1/ROCK2/NRP1/HIPK2/VEGFC/ADAMTS1/TEK/THBS1/TGFBR2/GPR4/ENG/PLK2/CDH5	17
GO:0003205	BP	GO:0003205	cardiac chamber development	12/185	166/18614	1.04478e-07	6.2707e-06	4.57804e-06	GJA5/DLL4/NRP1/NOTCH1/HEG1/DHRS3/JAG1/BMPR2/ADAMTS1/TEK/TGFBR2/ENG	12
GO:0007160	BP	GO:0007160	cell-matrix adhesion	14/185	239/18614	1.23447e-07	7.26673e-06	5.30521e-06	KDR/ITGA8/ITGA1/ITGB5/UTRN/ROCK2/NRP1/RIN2/JAG1/LIMCH1/DLC1/JAM3/TEK/THBS1	14
GO:0060840	BP	GO:0060840	artery development	10/185	109/18614	1.34232e-07	7.63255e-06	5.57228e-06	GJA5/DLL4/EFNB2/NRP1/NOTCH1/ADGRF5/JAG1/BMPR2/TGFBR2/ENG	10
GO:0003179	BP	GO:0003179	heart valve morphogenesis	8/185	60/18614	1.34648e-07	7.63255e-06	5.57228e-06	ADAMTS5/GJA5/DLL4/ROCK2/NOTCH1/JAG1/BMPR2/TGFBR2	8
GO:0003176	BP	GO:0003176	aortic valve development	7/185	43/18614	2.03655e-07	1.13343e-05	8.2748e-06	ADAMTS5/DLL4/ROCK2/NOTCH1/JAG1/BMPR2/TGFBR2	7
GO:1901888	BP	GO:1901888	regulation of cell junction assembly	13/185	214/18614	2.32527e-07	1.27101e-05	9.27923e-06	KDR/RAPGEF2/ROCK2/NRP1/ARHGEF15/MYO1C/LIMCH1/ACE/DLC1/TEK/THBS1/APP/CLSTN1	13
GO:0072091	BP	GO:0072091	regulation of stem cell proliferation	9/185	91/18614	3.0283e-07	1.62625e-05	1.18727e-05	KDR/SOX18/NOTCH1/PBX1/GJA1/VEGFC/ACE/SOX17/TGFBR2	9
GO:0001654	BP	GO:0001654	eye development	17/185	385/18614	3.16261e-07	1.66909e-05	1.21855e-05	KDR/FLT1/MEIS2/DLL4/NRP1/NOTCH1/NES/PBX1/ARHGEF15/JAG1/BMPR2/HIPK2/LAMB2/TGFBR2/ZEB1/COL8A1/FZD4	17
GO:0043535	BP	GO:0043535	regulation of blood vessel endothelial cell migration	11/185	152/18614	3.56283e-07	1.81281e-05	1.32347e-05	JCAD/KDR/PDGFB/DLL4/NRP1/NOTCH1/PIK3C2A/VEGFC/MMRN2/THBS1/PLK2	11
GO:0072006	BP	GO:0072006	nephron development	11/185	152/18614	3.56283e-07	1.81281e-05	1.32347e-05	PDGFB/PDGFD/SULF1/NOTCH1/PBX1/JAG1/PODXL/TEK/LAMB2/GPR4/EDNRB	11
GO:0150063	BP	GO:0150063	visual system development	17/185	389/18614	3.65587e-07	1.81281e-05	1.32347e-05	KDR/FLT1/MEIS2/DLL4/NRP1/NOTCH1/NES/PBX1/ARHGEF15/JAG1/BMPR2/HIPK2/LAMB2/TGFBR2/ZEB1/COL8A1/FZD4	17
GO:0060841	BP	GO:0060841	venous blood vessel development	5/185	16/18614	3.67182e-07	1.81281e-05	1.32347e-05	EFNB2/NOTCH1/HEG1/BMPR2/ENG	5
GO:0090100	BP	GO:0090100	positive regulation of transmembrane receptor protein serine/threonine kinase signaling pathway	10/185	122/18614	3.88214e-07	1.88623e-05	1.37707e-05	KDR/ITGA8/SULF1/NOTCH1/BMPR2/HIPK2/THBS1/TGFBR2/ENG/CDH5	10
GO:0061138	BP	GO:0061138	morphogenesis of a branching epithelium	12/185	188/18614	4.04087e-07	1.93267e-05	1.41098e-05	KDR/NTN4/DLL4/SULF1/NRP1/NOTCH1/RASIP1/PBX1/TGM2/NOTCH4/TGFBR2/ENG	12
GO:0035850	BP	GO:0035850	epithelial cell differentiation involved in kidney development	7/185	48/18614	4.46244e-07	2.09993e-05	1.53309e-05	PDGFB/NOTCH1/JAG1/PODXL/LAMB2/GPR4/EDNRB	7
GO:0048880	BP	GO:0048880	sensory system development	17/185	395/18614	4.52779e-07	2.09993e-05	1.53309e-05	KDR/FLT1/MEIS2/DLL4/NRP1/NOTCH1/NES/PBX1/ARHGEF15/JAG1/BMPR2/HIPK2/LAMB2/TGFBR2/ZEB1/COL8A1/FZD4	17
GO:0090066	BP	GO:0090066	regulation of anatomical structure size	19/185	492/18614	4.85925e-07	2.19194e-05	1.60026e-05	SEMA3G/GJA5/ITGA1/CHRM3/CXCL12/ROCK2/NRP1/BMPR2/LIMA1/ADD1/PIK3C2A/ACE/SPTBN1/SEMA3F/ECE1/SEMA6B/ARHGAP18/EDNRB/NCKAP1	19
GO:0001952	BP	GO:0001952	regulation of cell-matrix adhesion	10/185	125/18614	4.86938e-07	2.19194e-05	1.60026e-05	KDR/UTRN/ROCK2/NRP1/RIN2/JAG1/LIMCH1/DLC1/TEK/THBS1	10
GO:0061028	BP	GO:0061028	establishment of endothelial barrier	7/185	49/18614	5.16277e-07	2.29032e-05	1.67209e-05	SOX18/RAPGEF2/ROCK2/PLCB1/ADD1/EDNRB/CDH5	7
GO:0061437	BP	GO:0061437	renal system vasculature development	6/185	31/18614	5.32187e-07	2.2944e-05	1.67507e-05	PDGFB/PDGFD/NRP1/NOTCH1/TEK/GPR4	6
GO:0061440	BP	GO:0061440	kidney vasculature development	6/185	31/18614	5.32187e-07	2.2944e-05	1.67507e-05	PDGFB/PDGFD/NRP1/NOTCH1/TEK/GPR4	6
GO:0001974	BP	GO:0001974	blood vessel remodeling	7/185	50/18614	5.95316e-07	2.49625e-05	1.82243e-05	CEACAM1/DLL4/JAG1/BMPR2/ACE/FLT4/EPAS1	7
GO:0038084	BP	GO:0038084	vascular endothelial growth factor signaling pathway	7/185	50/18614	5.95316e-07	2.49625e-05	1.82243e-05	JCAD/KDR/FLT1/NRP1/MYO1C/VEGFC/FLT4	7
GO:0003170	BP	GO:0003170	heart valve development	8/185	73/18614	6.33716e-07	2.62136e-05	1.91377e-05	ADAMTS5/GJA5/DLL4/ROCK2/NOTCH1/JAG1/BMPR2/TGFBR2	8
GO:0061384	BP	GO:0061384	heart trabecula morphogenesis	6/185	32/18614	6.49617e-07	2.6513e-05	1.93563e-05	DLL4/NOTCH1/HEG1/ADAMTS1/TEK/ENG	6
GO:0043536	BP	GO:0043536	positive regulation of blood vessel endothelial cell migration	8/185	75/18614	7.82031e-07	3.14973e-05	2.29952e-05	JCAD/KDR/PDGFB/NRP1/PIK3C2A/VEGFC/THBS1/PLK2	8
GO:0001763	BP	GO:0001763	morphogenesis of a branching structure	12/185	203/18614	9.166e-07	3.64378e-05	2.66021e-05	KDR/NTN4/DLL4/SULF1/NRP1/NOTCH1/RASIP1/PBX1/TGM2/NOTCH4/TGFBR2/ENG	12
GO:0048841	BP	GO:0048841	regulation of axon extension involved in axon guidance	6/185	34/18614	9.48335e-07	3.72161e-05	2.71702e-05	SEMA3G/CXCL12/NRP1/BMPR2/SEMA3F/SEMA6B	6
GO:0003279	BP	GO:0003279	cardiac septum development	9/185	107/18614	1.20886e-06	4.67317e-05	3.41173e-05	GJA5/NRP1/NOTCH1/HEG1/DHRS3/JAG1/BMPR2/TGFBR2/ENG	9
GO:0048015	BP	GO:0048015	phosphatidylinositol-mediated signaling	11/185	172/18614	1.22134e-06	4.67317e-05	3.41173e-05	KDR/CEACAM1/FLT1/PDGFB/UNC5B/PDGFD/PLCB1/PIK3C2A/TEK/INSR/PREX2	11
GO:0060562	BP	GO:0060562	epithelial tube morphogenesis	15/185	334/18614	1.30539e-06	4.93309e-05	3.60149e-05	KDR/DLL4/EFNB2/SOX18/NRP1/NOTCH1/RASIP1/PBX1/PODXL/DLC1/MMRN2/SOX17/NOTCH4/TGFBR2/ENG	15
GO:0001569	BP	GO:0001569	branching involved in blood vessel morphogenesis	6/185	36/18614	1.35098e-06	5.0431e-05	3.68181e-05	KDR/DLL4/NRP1/NOTCH4/TGFBR2/ENG	6
GO:0043010	BP	GO:0043010	camera-type eye development	15/185	338/18614	1.51342e-06	5.57985e-05	4.07367e-05	KDR/FLT1/DLL4/NRP1/NOTCH1/NES/ARHGEF15/JAG1/BMPR2/HIPK2/LAMB2/TGFBR2/ZEB1/COL8A1/FZD4	15
GO:0048017	BP	GO:0048017	inositol lipid-mediated signaling	11/185	176/18614	1.53122e-06	5.57985e-05	4.07367e-05	KDR/CEACAM1/FLT1/PDGFB/UNC5B/PDGFD/PLCB1/PIK3C2A/TEK/INSR/PREX2	11
GO:0003230	BP	GO:0003230	cardiac atrium development	6/185	37/18614	1.59921e-06	5.69209e-05	4.15561e-05	GJA5/DLL4/NOTCH1/HEG1/BMPR2/ENG	6
GO:0035909	BP	GO:0035909	aorta morphogenesis	6/185	37/18614	1.59921e-06	5.69209e-05	4.15561e-05	DLL4/EFNB2/NOTCH1/JAG1/TGFBR2/ENG	6
GO:0061005	BP	GO:0061005	cell differentiation involved in kidney development	7/185	58/18614	1.67597e-06	5.89672e-05	4.305e-05	PDGFB/NOTCH1/JAG1/PODXL/LAMB2/GPR4/EDNRB	7
GO:0007229	BP	GO:0007229	integrin-mediated signaling pathway	9/185	112/18614	1.77534e-06	6.15919e-05	4.49663e-05	CEACAM1/ITGA8/PLPP3/ITGA1/ITGB5/NRP1/ADAMTS1/LAMB2/DOCK1	9
GO:0014065	BP	GO:0014065	phosphatidylinositol 3-kinase signaling	10/185	144/18614	1.79081e-06	6.15919e-05	4.49663e-05	KDR/CEACAM1/FLT1/PDGFB/UNC5B/PDGFD/PIK3C2A/TEK/INSR/PREX2	10
GO:0003180	BP	GO:0003180	aortic valve morphogenesis	6/185	38/18614	1.88347e-06	6.23093e-05	4.549e-05	ADAMTS5/DLL4/ROCK2/NOTCH1/JAG1/TGFBR2	6
GO:0048846	BP	GO:0048846	axon extension involved in axon guidance	6/185	38/18614	1.88347e-06	6.23093e-05	4.549e-05	SEMA3G/CXCL12/NRP1/BMPR2/SEMA3F/SEMA6B	6
GO:1902284	BP	GO:1902284	neuron projection extension involved in neuron projection guidance	6/185	38/18614	1.88347e-06	6.23093e-05	4.549e-05	SEMA3G/CXCL12/NRP1/BMPR2/SEMA3F/SEMA6B	6
GO:0062042	BP	GO:0062042	regulation of cardiac epithelial to mesenchymal transition	4/185	10/18614	1.8931e-06	6.23093e-05	4.549e-05	NOTCH1/JAG1/TGFBR2/ENG	4
GO:0001938	BP	GO:0001938	positive regulation of endothelial cell proliferation	9/185	115/18614	2.21487e-06	7.21245e-05	5.26558e-05	JCAD/KDR/PDGFB/CXCL12/NRP1/BMPR2/VEGFC/TEK/FLT4	9
GO:0043410	BP	GO:0043410	positive regulation of MAPK cascade	18/185	495/18614	2.319e-06	7.47205e-05	5.4551e-05	JCAD/KDR/FLT1/PDGFB/ITGA1/PDGFD/RAPGEF2/ROCK2/NRP1/NOTCH1/PLCB1/HIPK2/TEK/THBS1/INSR/APP/FLT4/FZD4	18
GO:0045766	BP	GO:0045766	positive regulation of angiogenesis	11/185	185/18614	2.49233e-06	7.86499e-05	5.74197e-05	JCAD/KDR/FLT1/NRP1/HIPK2/VEGFC/TEK/THBS1/TGFBR2/ENG/CDH5	11
GO:1904018	BP	GO:1904018	positive regulation of vasculature development	11/185	185/18614	2.49233e-06	7.86499e-05	5.74197e-05	JCAD/KDR/FLT1/NRP1/HIPK2/VEGFC/TEK/THBS1/TGFBR2/ENG/CDH5	11
GO:0003177	BP	GO:0003177	pulmonary valve development	5/185	23/18614	2.6732e-06	8.2485e-05	6.02196e-05	ADAMTS5/GJA5/NOTCH1/JAG1/BMPR2	5
GO:0007411	BP	GO:0007411	axon guidance	12/185	225/18614	2.69471e-06	8.2485e-05	6.02196e-05	SEMA3G/UNC5B/EFNB2/CXCL12/NRP1/NOTCH1/BMPR2/SEMA3F/LAMB2/APP/ECE1/SEMA6B	12
GO:0097485	BP	GO:0097485	neuron projection guidance	12/185	225/18614	2.69471e-06	8.2485e-05	6.02196e-05	SEMA3G/UNC5B/EFNB2/CXCL12/NRP1/NOTCH1/BMPR2/SEMA3F/LAMB2/APP/ECE1/SEMA6B	12
GO:0048568	BP	GO:0048568	embryonic organ development	17/185	453/18614	2.94869e-06	8.93659e-05	6.52431e-05	KDR/PDGFB/ITGA8/SOX18/MYO6/A2M/NOTCH1/NES/PBX1/HIPK2/SOX17/ECE1/TGFBR2/ZEB1/ENG/PCDH12/EPAS1	17
GO:0030513	BP	GO:0030513	positive regulation of BMP signaling pathway	6/185	41/18614	2.99272e-06	8.9811e-05	6.55681e-05	KDR/SULF1/NOTCH1/BMPR2/ENG/CDH5	6
GO:0051893	BP	GO:0051893	regulation of focal adhesion assembly	7/185	64/18614	3.2932e-06	9.69277e-05	7.07638e-05	KDR/ROCK2/NRP1/LIMCH1/DLC1/TEK/THBS1	7
GO:0090109	BP	GO:0090109	regulation of cell-substrate junction assembly	7/185	64/18614	3.2932e-06	9.69277e-05	7.07638e-05	KDR/ROCK2/NRP1/LIMCH1/DLC1/TEK/THBS1	7
GO:0060485	BP	GO:0060485	mesenchyme development	14/185	320/18614	4.03389e-06	0.000117597	8.58541e-05	RFLNB/ADAMTS5/SEMA3G/ROCK2/NRP1/NOTCH1/JAG1/BMPR2/SEMA3F/NOTCH4/TGFBR2/SEMA6B/EDNRB/ENG	14
GO:0003157	BP	GO:0003157	endocardium development	4/185	12/18614	4.39326e-06	0.00012568	9.17549e-05	KDR/SOX18/NOTCH1/SOX17	4
GO:2001214	BP	GO:2001214	positive regulation of vasculogenesis	4/185	12/18614	4.39326e-06	0.00012568	9.17549e-05	KDR/CEACAM1/RAPGEF2/RIN2	4
GO:0071526	BP	GO:0071526	semaphorin-plexin signaling pathway	6/185	44/18614	4.58367e-06	0.000129913	9.48453e-05	KDR/SEMA3G/NRP1/SEMA3F/ECE1/SEMA6B	6
GO:0030336	BP	GO:0030336	negative regulation of cell migration	15/185	375/18614	5.39043e-06	0.000151377	0.000110516	DLL4/SULF1/CXCL12/IGFBP5/NOTCH1/JAG1/PLCB1/MCC/GJA1/LIMCH1/DLC1/MMRN2/THBS1/ENG/PTPRG	15
GO:0150116	BP	GO:0150116	regulation of cell-substrate junction organization	7/185	69/18614	5.48534e-06	0.000152642	0.000111439	KDR/ROCK2/NRP1/LIMCH1/DLC1/TEK/THBS1	7
GO:0061572	BP	GO:0061572	actin filament bundle organization	10/185	165/18614	6.0856e-06	0.000166819	0.000121789	RFLNB/ITGB5/ROCK2/NRP1/ARHGEF15/LIMCH1/LIMA1/ADD1/DLC1/TNFAIP1	10
GO:0007266	BP	GO:0007266	Rho protein signal transduction	9/185	130/18614	6.10381e-06	0.000166819	0.000121789	ROCK2/NRP1/RASIP1/HEG1/DLC1/ARHGEF12/GPR4/TNFAIP1/ARHGAP29	9
GO:0061383	BP	GO:0061383	trabecula morphogenesis	6/185	47/18614	6.80208e-06	0.000184258	0.000134521	DLL4/NOTCH1/HEG1/ADAMTS1/TEK/ENG	6
GO:0060411	BP	GO:0060411	cardiac septum morphogenesis	7/185	72/18614	7.30418e-06	0.000196124	0.000143183	NRP1/NOTCH1/DHRS3/JAG1/BMPR2/TGFBR2/ENG	7
GO:2000146	BP	GO:2000146	negative regulation of cell motility	15/185	390/18614	8.62335e-06	0.000229531	0.000167573	DLL4/SULF1/CXCL12/IGFBP5/NOTCH1/JAG1/PLCB1/MCC/GJA1/LIMCH1/DLC1/MMRN2/THBS1/ENG/PTPRG	15
GO:0003222	BP	GO:0003222	ventricular trabecula myocardium morphogenesis	4/185	14/18614	8.74676e-06	0.000229577	0.000167607	DLL4/NOTCH1/HEG1/ENG	4
GO:0051145	BP	GO:0051145	smooth muscle cell differentiation	7/185	74/18614	8.77508e-06	0.000229577	0.000167607	PDGFB/ITGA8/NOTCH1/ZEB1/EDNRB/ENG/QKI	7
GO:0003209	BP	GO:0003209	cardiac atrium morphogenesis	5/185	29/18614	8.98887e-06	0.000231218	0.000168805	DLL4/NOTCH1/HEG1/BMPR2/ENG	5
GO:0072012	BP	GO:0072012	glomerulus vasculature development	5/185	29/18614	8.98887e-06	0.000231218	0.000168805	PDGFB/PDGFD/NOTCH1/TEK/GPR4	5
GO:0048762	BP	GO:0048762	mesenchymal cell differentiation	12/185	255/18614	9.68751e-06	0.000247112	0.000180409	RFLNB/SEMA3G/ROCK2/NRP1/NOTCH1/JAG1/SEMA3F/NOTCH4/TGFBR2/SEMA6B/EDNRB/ENG	12
GO:0045216	BP	GO:0045216	cell-cell junction organization	11/185	214/18614	1.00543e-05	0.000254349	0.000185692	GJA5/EFNB2/ROCK2/HEG1/MYO1C/GJA1/ADD1/ACE/JAM3/MPDZ/CDH5	11
GO:0050680	BP	GO:0050680	negative regulation of epithelial cell proliferation	10/185	177/18614	1.12981e-05	0.000283472	0.000206954	CEACAM1/FLT1/DLL4/EFNB2/SULF1/NOTCH1/MCC/MMRN2/THBS1/ZEB1	10
GO:0003197	BP	GO:0003197	endocardial cushion development	6/185	52/18614	1.23767e-05	0.000306176	0.000223529	ADAMTS5/NOTCH1/JAG1/BMPR2/TGFBR2/ENG	6
GO:0035296	BP	GO:0035296	regulation of tube diameter	9/185	142/18614	1.25031e-05	0.000306176	0.000223529	GJA5/ITGA1/CHRM3/ROCK2/BMPR2/PIK3C2A/ACE/ECE1/EDNRB	9
GO:0097746	BP	GO:0097746	blood vessel diameter maintenance	9/185	142/18614	1.25031e-05	0.000306176	0.000223529	GJA5/ITGA1/CHRM3/ROCK2/BMPR2/PIK3C2A/ACE/ECE1/EDNRB	9
GO:0035150	BP	GO:0035150	regulation of tube size	9/185	143/18614	1.323e-05	0.000321405	0.000234647	GJA5/ITGA1/CHRM3/ROCK2/BMPR2/PIK3C2A/ACE/ECE1/EDNRB	9
GO:0042310	BP	GO:0042310	vasoconstriction	7/185	79/18614	1.35568e-05	0.000326751	0.00023855	GJA5/CHRM3/BMPR2/PIK3C2A/ACE/ECE1/EDNRB	7
GO:0048771	BP	GO:0048771	tissue remodeling	10/185	181/18614	1.37325e-05	0.000328401	0.000239755	CEACAM1/DLL4/ROCK2/IGFBP5/JAG1/BMPR2/GJA1/ACE/FLT4/EPAS1	10
GO:0007162	BP	GO:0007162	negative regulation of cell adhesion	13/185	312/18614	1.51239e-05	0.000358871	0.000262	CEACAM1/CXCL12/NOTCH1/JAG1/SPRY4/PODXL/LRRC32/DLC1/IDO1/JAM3/NOTCH4/THBS1/FZD4	13
GO:0042692	BP	GO:0042692	muscle cell differentiation	15/185	410/18614	1.5571e-05	0.000365858	0.000267101	ADAMTS5/PDGFB/ITGA8/EFNB2/IGFBP5/NOTCH1/BMPR2/SORBS2/LAMB2/MEF2A/DOCK1/ZEB1/EDNRB/ENG/QKI	15
GO:2001212	BP	GO:2001212	regulation of vasculogenesis	4/185	16/18614	1.56574e-05	0.000365858	0.000267101	KDR/CEACAM1/RAPGEF2/RIN2	4
GO:0014066	BP	GO:0014066	regulation of phosphatidylinositol 3-kinase signaling	8/185	112/18614	1.61263e-05	0.000373958	0.000273015	KDR/CEACAM1/FLT1/PDGFB/UNC5B/PDGFD/TEK/INSR	8
GO:0014068	BP	GO:0014068	positive regulation of phosphatidylinositol 3-kinase signaling	7/185	83/18614	1.878e-05	0.000432222	0.000315551	KDR/FLT1/PDGFB/UNC5B/PDGFD/TEK/INSR	7
GO:0072109	BP	GO:0072109	glomerular mesangium development	4/185	17/18614	2.03163e-05	0.000457267	0.000333835	PDGFB/PDGFD/NOTCH1/GPR4	4
GO:1901550	BP	GO:1901550	regulation of endothelial cell development	4/185	17/18614	2.03163e-05	0.000457267	0.000333835	ROCK2/PLCB1/ADD1/CDH5	4
GO:1903140	BP	GO:1903140	regulation of establishment of endothelial barrier	4/185	17/18614	2.03163e-05	0.000457267	0.000333835	ROCK2/PLCB1/ADD1/CDH5	4
GO:0018108	BP	GO:0018108	peptidyl-tyrosine phosphorylation	14/185	370/18614	2.0809e-05	0.000464936	0.000339435	KDR/FLT1/PDGFB/ENPP2/PLPP3/PDGFD/GPRC5B/NRP1/HIPK2/ACE/TEK/INSR/APP/FLT4	14
GO:0018212	BP	GO:0018212	peptidyl-tyrosine modification	14/185	372/18614	2.20864e-05	0.000489901	0.000357661	KDR/FLT1/PDGFB/ENPP2/PLPP3/PDGFD/GPRC5B/NRP1/HIPK2/ACE/TEK/INSR/APP/FLT4	14
GO:0090050	BP	GO:0090050	positive regulation of cell migration involved in sprouting angiogenesis	5/185	35/18614	2.34133e-05	0.000512097	0.000373865	JCAD/KDR/NRP1/PIK3C2A/PLK2	5
GO:0048008	BP	GO:0048008	platelet-derived growth factor receptor signaling pathway	6/185	58/18614	2.34216e-05	0.000512097	0.000373865	PDGFB/PDGFD/NRP1/PIK3C2A/PTPN12/HIP1	6
GO:0048041	BP	GO:0048041	focal adhesion assembly	7/185	86/18614	2.37033e-05	0.000514579	0.000375678	KDR/ROCK2/NRP1/LIMCH1/DLC1/TEK/THBS1	7
GO:0061298	BP	GO:0061298	retina vasculature development in camera-type eye	4/185	18/18614	2.59185e-05	0.000558708	0.000407894	NRP1/ARHGEF15/BMPR2/FZD4	4
GO:0045785	BP	GO:0045785	positive regulation of cell adhesion	16/185	482/18614	2.6575e-05	0.000568853	0.000415301	KDR/PDGFB/PLPP3/EFNB2/CXCL12/UTRN/NRP1/RIN2/PODXL/TGM2/TEK/LAMB2/DOCK1/TGFBR2/MYO10/COL8A1	16
GO:0033674	BP	GO:0033674	positive regulation of kinase activity	15/185	430/18614	2.70951e-05	0.00057596	0.00042049	TCIM/KDR/FLT1/PDGFB/PDGFD/GPRC5B/RAPGEF2/VEGFC/ACE/TEK/THBS1/INSR/FLT4/TGFBR2/FZD4	15
GO:0048754	BP	GO:0048754	branching morphogenesis of an epithelial tube	9/185	157/18614	2.78695e-05	0.000588335	0.000429525	KDR/DLL4/NRP1/NOTCH1/RASIP1/PBX1/NOTCH4/TGFBR2/ENG	9
GO:0022612	BP	GO:0022612	gland morphogenesis	8/185	123/18614	3.18353e-05	0.00066745	0.000487284	CEACAM1/NTN4/SULF1/NRP1/IGFBP5/NOTCH1/TGM2/TGFBR2	8
GO:0003184	BP	GO:0003184	pulmonary valve morphogenesis	4/185	19/18614	3.25757e-05	0.000678327	0.000495225	ADAMTS5/GJA5/NOTCH1/JAG1	4
GO:0051017	BP	GO:0051017	actin filament bundle assembly	9/185	161/18614	3.39849e-05	0.000700141	0.00051115	ITGB5/ROCK2/NRP1/ARHGEF15/LIMCH1/LIMA1/ADD1/DLC1/TNFAIP1	9
GO:0032970	BP	GO:0032970	regulation of actin filament-based process	14/185	387/18614	3.40807e-05	0.000700141	0.00051115	GJA5/CXCL12/ROCK2/NRP1/ARHGEF15/LIMCH1/LIMA1/ADD1/DLC1/SPTBN1/JAM3/TEK/ARHGAP18/NCKAP1	14
GO:0031032	BP	GO:0031032	actomyosin structure organization	10/185	202/18614	3.5337e-05	0.000721111	0.00052646	ITGB5/ROCK2/NRP1/ARHGEF15/LIMCH1/CDC42BPA/DLC1/CDC42BPB/MEF2A/TNFAIP1	10
GO:0010811	BP	GO:0010811	positive regulation of cell-substrate adhesion	8/185	125/18614	3.57502e-05	0.000724711	0.000529088	KDR/PDGFB/UTRN/NRP1/RIN2/TEK/DOCK1/COL8A1	8
GO:0035904	BP	GO:0035904	aorta development	6/185	63/18614	3.77346e-05	0.000755698	0.000551711	DLL4/EFNB2/NOTCH1/JAG1/TGFBR2/ENG	6
GO:0003231	BP	GO:0003231	cardiac ventricle development	8/185	126/18614	3.78538e-05	0.000755698	0.000551711	GJA5/DLL4/NOTCH1/HEG1/JAG1/BMPR2/TGFBR2/ENG	8
GO:0048863	BP	GO:0048863	stem cell differentiation	11/185	247/18614	3.80194e-05	0.000755698	0.000551711	SEMA3G/SOX18/A2M/NRP1/NOTCH1/JAG1/ACE/SEMA3F/SOX17/SEMA6B/EDNRB	11
GO:0003073	BP	GO:0003073	regulation of systemic arterial blood pressure	7/185	94/18614	4.22403e-05	0.000834178	0.000609006	GJA5/PDGFB/BMPR2/ACE/RPS6KA2/ECE1/EDNRB	7
GO:0030856	BP	GO:0030856	regulation of epithelial cell differentiation	9/185	166/18614	4.31946e-05	0.000847556	0.000618773	CEACAM1/ROCK2/NOTCH1/JAG1/PLCB1/ADD1/NOTCH4/ZEB1/CDH5	9
GO:0032956	BP	GO:0032956	regulation of actin cytoskeleton organization	13/185	346/18614	4.44038e-05	0.000865733	0.000632043	CXCL12/ROCK2/NRP1/ARHGEF15/LIMCH1/LIMA1/ADD1/DLC1/SPTBN1/JAM3/TEK/ARHGAP18/NCKAP1	13
GO:0007178	BP	GO:0007178	transmembrane receptor protein serine/threonine kinase signaling pathway	14/185	398/18614	4.61964e-05	0.000894983	0.000653398	KDR/ITGA8/SULF1/ITGB5/NOTCH1/BMPR2/HIPK2/LRRC32/SPTBN1/THBS1/TGFBR2/ZEB1/ENG/CDH5	14
GO:0007044	BP	GO:0007044	cell-substrate junction assembly	7/185	96/18614	4.83738e-05	0.000931271	0.000679891	KDR/ROCK2/NRP1/LIMCH1/DLC1/TEK/THBS1	7
GO:0010812	BP	GO:0010812	negative regulation of cell-substrate adhesion	6/185	66/18614	4.92315e-05	0.00094186	0.000687622	NOTCH1/JAG1/SPRY4/DLC1/THBS1/FZD4	6
GO:0048661	BP	GO:0048661	positive regulation of smooth muscle cell proliferation	7/185	99/18614	5.89271e-05	0.00112035	0.000817929	PDGFB/PDGFD/IGFBP5/GJA1/ADAMTS1/THBS1/TGFBR2	7
GO:0035024	BP	GO:0035024	negative regulation of Rho protein signal transduction	4/185	22/18614	6.00612e-05	0.00112102	0.00081842	RASIP1/HEG1/DLC1/TNFAIP1	4
GO:0061318	BP	GO:0061318	renal filtration cell differentiation	4/185	22/18614	6.00612e-05	0.00112102	0.00081842	JAG1/PODXL/LAMB2/EDNRB	4
GO:0072112	BP	GO:0072112	podocyte differentiation	4/185	22/18614	6.00612e-05	0.00112102	0.00081842	JAG1/PODXL/LAMB2/EDNRB	4
GO:0034446	BP	GO:0034446	substrate adhesion-dependent cell spreading	7/185	100/18614	6.28369e-05	0.00116572	0.000851054	NTN4/ITGA8/NRP1/SPRY4/TEK/DOCK1/FZD4	7
GO:0031952	BP	GO:0031952	regulation of protein autophosphorylation	5/185	43/18614	6.50999e-05	0.00120043	0.000876392	PDGFB/PDGFD/VEGFC/ACE/ENG	5
GO:0050922	BP	GO:0050922	negative regulation of chemotaxis	6/185	70/18614	6.87495e-05	0.00126013	0.000919983	SEMA3G/NRP1/NOTCH1/SEMA3F/THBS1/SEMA6B	6
GO:0060326	BP	GO:0060326	cell chemotaxis	12/185	312/18614	7.0138e-05	0.00127793	0.000932975	KDR/FLT1/PDGFB/ITGA1/PDGFD/CXCL12/NRP1/NOTCH1/VEGFC/JAM3/THBS1/EDNRB	12
GO:0072311	BP	GO:0072311	glomerular epithelial cell differentiation	4/185	23/18614	7.21428e-05	0.00130668	0.000953966	JAG1/PODXL/LAMB2/EDNRB	4
GO:0003208	BP	GO:0003208	cardiac ventricle morphogenesis	6/185	71/18614	7.44818e-05	0.00134111	0.000979102	DLL4/NOTCH1/HEG1/JAG1/TGFBR2/ENG	6
GO:0150115	BP	GO:0150115	cell-substrate junction organization	7/185	103/18614	7.58577e-05	0.0013579	0.000991356	KDR/ROCK2/NRP1/LIMCH1/DLC1/TEK/THBS1	7
GO:0007219	BP	GO:0007219	Notch signaling pathway	9/185	179/18614	7.75041e-05	0.0013793	0.00100698	TCIM/JAG2/DLL4/NOTCH1/JAG1/SORBS2/NOTCH4/APP/TGFBR2	9
GO:0110053	BP	GO:0110053	regulation of actin filament organization	11/185	268/18614	7.93431e-05	0.00140387	0.00102492	CXCL12/ROCK2/NRP1/ARHGEF15/LIMCH1/LIMA1/ADD1/DLC1/SPTBN1/ARHGAP18/NCKAP1	11
GO:0021700	BP	GO:0021700	developmental maturation	12/185	319/18614	8.66057e-05	0.00152356	0.0011123	RFLNB/KDR/NTN4/SOX18/ARHGEF15/RPS6KA2/APP/EDNRB/SCARF1/CDH5/EPAS1/CLSTN1	12
GO:0050679	BP	GO:0050679	positive regulation of epithelial cell proliferation	10/185	225/18614	8.7407e-05	0.00152887	0.00111618	JCAD/KDR/PDGFB/CXCL12/NRP1/NOTCH1/BMPR2/VEGFC/TEK/FLT4	10
GO:0014911	BP	GO:0014911	positive regulation of smooth muscle cell migration	5/185	46/18614	9.04962e-05	0.00157391	0.00114906	PDGFB/PDGFD/NRP1/IGFBP5/ADAMTS1	5
GO:0050921	BP	GO:0050921	positive regulation of chemotaxis	8/185	143/18614	9.2813e-05	0.00160509	0.00117182	KDR/PDGFB/PDGFD/CXCL12/NRP1/BMPR2/VEGFC/THBS1	8
GO:0046777	BP	GO:0046777	protein autophosphorylation	10/185	227/18614	9.40511e-05	0.00161736	0.00118078	KDR/FLT1/PDGFB/PDGFD/VEGFC/ACE/TEK/INSR/FLT4/ENG	10
GO:0048286	BP	GO:0048286	lung alveolus development	5/185	47/18614	0.00010046	0.00171792	0.0012542	KDR/IGFBP5/BMPR2/ACE/FLT4	5
GO:0003148	BP	GO:0003148	outflow tract septum morphogenesis	4/185	25/18614	0.000101473	0.0017256	0.0012598	NRP1/BMPR2/TGFBR2/ENG	4
GO:1902903	BP	GO:1902903	regulation of supramolecular fiber organization	13/185	376/18614	0.000102972	0.00174143	0.00127136	CXCL12/ROCK2/NRP1/ARHGEF15/LIMCH1/LIMA1/ADD1/DLC1/SPTBN1/APP/ARHGAP18/NCKAP1/CDH5	13
GO:0030324	BP	GO:0030324	lung development	9/185	186/18614	0.000103966	0.00174857	0.00127657	KDR/IGFBP5/NOTCH1/HEG1/BMPR2/ACE/FLT4/TGFBR2/EPAS1	9
GO:0008217	BP	GO:0008217	regulation of blood pressure	9/185	187/18614	0.000108301	0.00178774	0.00130517	GJA5/PDGFB/GNA11/BMPR2/VEGFC/ACE/RPS6KA2/ECE1/EDNRB	9
GO:0030038	BP	GO:0030038	contractile actin filament bundle assembly	7/185	109/18614	0.000108522	0.00178774	0.00130517	ITGB5/ROCK2/NRP1/ARHGEF15/LIMCH1/DLC1/TNFAIP1	7
GO:0043149	BP	GO:0043149	stress fiber assembly	7/185	109/18614	0.000108522	0.00178774	0.00130517	ITGB5/ROCK2/NRP1/ARHGEF15/LIMCH1/DLC1/TNFAIP1	7
GO:0048588	BP	GO:0048588	developmental cell growth	10/185	231/18614	0.000108631	0.00178774	0.00130517	SEMA3G/CXCL12/NRP1/BMPR2/SORBS2/SEMA3F/LAMB2/APP/TGFBR2/SEMA6B	10
GO:0061299	BP	GO:0061299	retina vasculature morphogenesis in camera-type eye	3/185	10/18614	0.000110109	0.00180238	0.00131586	NRP1/ARHGEF15/FZD4	3
GO:0071559	BP	GO:0071559	response to transforming growth factor beta	11/185	280/18614	0.000116972	0.00190208	0.00138864	ITGA8/PDGFD/ITGB5/ROCK2/HIPK2/LRRC32/THBS1/TGFBR2/ZEB1/ENG/CDH5	11
GO:0050767	BP	GO:0050767	regulation of neurogenesis	13/185	381/18614	0.000117443	0.00190208	0.00138864	SEMA3G/DLL4/RAPGEF2/CXCL12/NRP1/NOTCH1/BMPR2/VEGFC/ACE/SEMA3F/TGM2/SEMA6B/FZD4	13
GO:0072010	BP	GO:0072010	glomerular epithelium development	4/185	26/18614	0.000118995	0.00191707	0.00139959	JAG1/PODXL/LAMB2/EDNRB	4
GO:0045165	BP	GO:0045165	cell fate commitment	11/185	281/18614	0.0001207	0.00192561	0.00140583	KDR/JAG2/DLL4/SOX18/NRP1/NOTCH1/JAG1/SOX17/NOTCH4/ETS2/EPAS1	11
GO:0060560	BP	GO:0060560	developmental growth involved in morphogenesis	10/185	234/18614	0.000120783	0.00192561	0.00140583	SEMA3G/CXCL12/NRP1/NOTCH1/BMPR2/SEMA3F/LAMB2/APP/TGFBR2/SEMA6B	10
GO:0030323	BP	GO:0030323	respiratory tube development	9/185	190/18614	0.000122226	0.00193851	0.00141524	KDR/IGFBP5/NOTCH1/HEG1/BMPR2/ACE/FLT4/TGFBR2/EPAS1	9
GO:0046580	BP	GO:0046580	negative regulation of Ras protein signal transduction	5/185	49/18614	0.000122896	0.0019391	0.00141567	RASIP1/HEG1/SPRY4/DLC1/TNFAIP1	5
GO:0016049	BP	GO:0016049	cell growth	15/185	495/18614	0.000131977	0.0020717	0.00151248	SEMA3G/CEACAM1/CXCL12/NRP1/IGFBP5/BMPR2/GJA1/SORBS2/SEMA3F/SOX17/LAMB2/APP/TGFBR2/SEMA6B/CLSTN1	15
GO:0031954	BP	GO:0031954	positive regulation of protein autophosphorylation	4/185	27/18614	0.000138609	0.00216471	0.00158039	PDGFB/PDGFD/VEGFC/ACE	4
GO:0061314	BP	GO:0061314	Notch signaling involved in heart development	3/185	11/18614	0.000150293	0.0023118	0.00168777	DLL4/NOTCH1/JAG1	3
GO:0099105	BP	GO:0099105	ion channel modulating, G protein-coupled receptor signaling pathway	3/185	11/18614	0.000150293	0.0023118	0.00168777	CHRM3/GNA11/PLCB1	3
GO:1904238	BP	GO:1904238	pericyte cell differentiation	3/185	11/18614	0.000150293	0.0023118	0.00168777	PDGFB/NOTCH1/GPR4	3
GO:0097529	BP	GO:0097529	myeloid leukocyte migration	10/185	241/18614	0.000153679	0.00235205	0.00171716	FLT1/PDGFB/ITGA1/PDGFD/CXCL12/PLCB1/VEGFC/JAM3/THBS1/EDNRB	10
GO:0007369	BP	GO:0007369	gastrulation	9/185	196/18614	0.0001546	0.00235438	0.00171886	ITGA8/PLPP3/ITGB5/BMPR2/GJA1/SOX17/ETS2/TGFBR2/COL8A1	9
GO:0003171	BP	GO:0003171	atrioventricular valve development	4/185	28/18614	0.000160461	0.00241956	0.00176645	GJA5/NOTCH1/BMPR2/TGFBR2	4
GO:0048843	BP	GO:0048843	negative regulation of axon extension involved in axon guidance	4/185	28/18614	0.000160461	0.00241956	0.00176645	SEMA3G/NRP1/SEMA3F/SEMA6B	4
GO:0060041	BP	GO:0060041	retina development in camera-type eye	8/185	155/18614	0.000162396	0.00243673	0.00177898	DLL4/NRP1/NOTCH1/ARHGEF15/BMPR2/HIPK2/LAMB2/FZD4	8
GO:0048738	BP	GO:0048738	cardiac muscle tissue development	10/185	243/18614	0.000164359	0.00245416	0.00179171	GJA5/DLL4/EFNB2/NOTCH1/HEG1/GJA1/SORBS2/MEF2A/TGFBR2/ENG	10
GO:0014032	BP	GO:0014032	neural crest cell development	6/185	82/18614	0.000166398	0.00247254	0.00180512	SEMA3G/NRP1/JAG1/SEMA3F/SEMA6B/EDNRB	6
GO:0007043	BP	GO:0007043	cell-cell junction assembly	8/185	157/18614	0.000177359	0.00260945	0.00190507	GJA5/ROCK2/MYO1C/GJA1/ACE/JAM3/MPDZ/CDH5	8
GO:0035023	BP	GO:0035023	regulation of Rho protein signal transduction	6/185	83/18614	0.0001779	0.00260945	0.00190507	NRP1/RASIP1/HEG1/DLC1/GPR4/TNFAIP1	6
GO:0030510	BP	GO:0030510	regulation of BMP signaling pathway	7/185	118/18614	0.000178169	0.00260945	0.00190507	KDR/SULF1/NOTCH1/BMPR2/HIPK2/ENG/CDH5	7
GO:0003094	BP	GO:0003094	glomerular filtration	4/185	29/18614	0.000184697	0.00269217	0.00196547	GJA5/PDGFB/SULF1/ADGRF5	4
GO:0071695	BP	GO:0071695	anatomical structure maturation	10/185	247/18614	0.000187606	0.00271068	0.00197898	RFLNB/KDR/NTN4/SOX18/RPS6KA2/APP/EDNRB/SCARF1/CDH5/EPAS1	10
GO:0048675	BP	GO:0048675	axon extension	7/185	119/18614	0.000187737	0.00271068	0.00197898	SEMA3G/CXCL12/NRP1/BMPR2/SEMA3F/LAMB2/SEMA6B	7
GO:0003174	BP	GO:0003174	mitral valve development	3/185	12/18614	0.000198927	0.00283216	0.00206767	GJA5/NOTCH1/BMPR2	3
GO:0045602	BP	GO:0045602	negative regulation of endothelial cell differentiation	3/185	12/18614	0.000198927	0.00283216	0.00206767	JAG1/NOTCH4/ZEB1	3
GO:0072015	BP	GO:0072015	podocyte development	3/185	12/18614	0.000198927	0.00283216	0.00206767	JAG1/PODXL/LAMB2	3
GO:0035050	BP	GO:0035050	embryonic heart tube development	6/185	85/18614	0.000202787	0.00287375	0.00209803	SOX18/NOTCH1/SOX17/ECE1/TGFBR2/ENG	6
GO:0051960	BP	GO:0051960	regulation of nervous system development	14/185	461/18614	0.000216807	0.00305827	0.00223274	SEMA3G/DLL4/RAPGEF2/CXCL12/NRP1/NOTCH1/BMPR2/VEGFC/ACE/SEMA3F/TGM2/SEMA6B/FZD4/CLSTN1	14
GO:0090092	BP	GO:0090092	regulation of transmembrane receptor protein serine/threonine kinase signaling pathway	11/185	301/18614	0.000219618	0.00308371	0.00225132	KDR/ITGA8/SULF1/NOTCH1/BMPR2/HIPK2/THBS1/TGFBR2/ZEB1/ENG/CDH5	11
GO:0032092	BP	GO:0032092	positive regulation of protein binding	6/185	87/18614	0.00023034	0.00320487	0.00233977	RAPGEF2/NRP1/HIPK2/ADD1/ACE/APP	6
GO:0033627	BP	GO:0033627	cell adhesion mediated by integrin	6/185	87/18614	0.00023034	0.00320487	0.00233977	ITGA8/PLPP3/ITGA1/ITGB5/PODXL/JAM3	6
GO:0001954	BP	GO:0001954	positive regulation of cell-matrix adhesion	5/185	56/18614	0.000232745	0.00320915	0.0023429	KDR/UTRN/NRP1/RIN2/TEK	5
GO:0051058	BP	GO:0051058	negative regulation of small GTPase mediated signal transduction	5/185	56/18614	0.000232745	0.00320915	0.0023429	RASIP1/HEG1/SPRY4/DLC1/TNFAIP1	5
GO:0035767	BP	GO:0035767	endothelial cell chemotaxis	4/185	31/18614	0.000240919	0.00327757	0.00239284	KDR/NRP1/NOTCH1/THBS1	4
GO:0061311	BP	GO:0061311	cell surface receptor signaling pathway involved in heart development	4/185	31/18614	0.000240919	0.00327757	0.00239284	DLL4/NOTCH1/JAG1/SOX17	4
GO:0097205	BP	GO:0097205	renal filtration	4/185	31/18614	0.000240919	0.00327757	0.00239284	GJA5/PDGFB/SULF1/ADGRF5	4
GO:0048864	BP	GO:0048864	stem cell development	6/185	88/18614	0.000245179	0.00332077	0.00242439	SEMA3G/NRP1/JAG1/SEMA3F/SEMA6B/EDNRB	6
GO:0007389	BP	GO:0007389	pattern specification process	14/185	467/18614	0.000247382	0.00333584	0.00243539	MEIS2/DLL4/SOX18/NRP1/NOTCH1/PBX1/BMPR2/HIPK2/SEMA3F/SOX17/ETS2/TGFBR2/ZEB1/ENG	14
GO:0060837	BP	GO:0060837	blood vessel endothelial cell differentiation	3/185	13/18614	0.000256716	0.00343147	0.00250521	KDR/NRP1/NOTCH1	3
GO:0072310	BP	GO:0072310	glomerular epithelial cell development	3/185	13/18614	0.000256716	0.00343147	0.00250521	JAG1/PODXL/LAMB2	3
GO:0060541	BP	GO:0060541	respiratory system development	9/185	211/18614	0.000268005	0.0035668	0.00260401	KDR/IGFBP5/NOTCH1/HEG1/BMPR2/ACE/FLT4/TGFBR2/EPAS1	9
GO:0014706	BP	GO:0014706	striated muscle tissue development	10/185	259/18614	0.000274584	0.00362491	0.00264643	GJA5/DLL4/EFNB2/NOTCH1/HEG1/GJA1/SORBS2/MEF2A/TGFBR2/ENG	10
GO:0001755	BP	GO:0001755	neural crest cell migration	5/185	58/18614	0.000274755	0.00362491	0.00264643	SEMA3G/NRP1/SEMA3F/SEMA6B/EDNRB	5
GO:0014910	BP	GO:0014910	regulation of smooth muscle cell migration	6/185	90/18614	0.000277109	0.00362491	0.00264643	PDGFB/PDGFD/NRP1/IGFBP5/ACE/ADAMTS1	6
GO:0030516	BP	GO:0030516	regulation of axon extension	6/185	90/18614	0.000277109	0.00362491	0.00264643	SEMA3G/CXCL12/NRP1/BMPR2/SEMA3F/SEMA6B	6
GO:0001704	BP	GO:0001704	formation of primary germ layer	7/185	127/18614	0.000280212	0.00363445	0.00265339	ITGA8/ITGB5/BMPR2/GJA1/SOX17/ETS2/COL8A1	7
GO:0003014	BP	GO:0003014	renal system process	7/185	127/18614	0.000280212	0.00363445	0.00265339	GJA5/PDGFB/SULF1/ADGRF5/ACE/ABCG2/EDNRB	7
GO:1903522	BP	GO:1903522	regulation of blood circulation	10/185	261/18614	0.000291935	0.00377051	0.00275273	GJA5/CHRM3/KCNE3/BMPR2/GJA1/ACE/ECE1/MEF2A/EDNRB/EPAS1	10
GO:0002063	BP	GO:0002063	chondrocyte development	4/185	33/18614	0.000308495	0.00391324	0.00285693	RFLNB/SULF1/BMPR2/TGFBR2	4
GO:0030947	BP	GO:0030947	regulation of vascular endothelial growth factor receptor signaling pathway	4/185	33/18614	0.000308495	0.00391324	0.00285693	NRP1/VEGFC/MMRN2/FZD4	4
GO:1901889	BP	GO:1901889	negative regulation of cell junction assembly	4/185	33/18614	0.000308495	0.00391324	0.00285693	ROCK2/ACE/DLC1/THBS1	4
GO:1905145	BP	GO:1905145	cellular response to acetylcholine	4/185	33/18614	0.000308495	0.00391324	0.00285693	CHRM3/ROCK2/GNA11/PLCB1	4
GO:0045860	BP	GO:0045860	positive regulation of protein kinase activity	12/185	366/18614	0.000309377	0.00391324	0.00285693	TCIM/FLT1/PDGFB/PDGFD/GPRC5B/RAPGEF2/VEGFC/ACE/THBS1/INSR/TGFBR2/FZD4	12
GO:0030198	BP	GO:0030198	extracellular matrix organization	11/185	314/18614	0.000315332	0.00397214	0.00289993	ADAMTS5/NTN4/ITGA8/SULF1/NOTCH1/ADAMTS1/MATN2/LAMB2/APP/ENG/COL8A1	11
GO:0090497	BP	GO:0090497	mesenchymal cell migration	5/185	60/18614	0.000322283	0.00400329	0.00292267	SEMA3G/NRP1/SEMA3F/SEMA6B/EDNRB	5
GO:0043062	BP	GO:0043062	extracellular structure organization	11/185	315/18614	0.000323962	0.00400329	0.00292267	ADAMTS5/NTN4/ITGA8/SULF1/NOTCH1/ADAMTS1/MATN2/LAMB2/APP/ENG/COL8A1	11
GO:0016322	BP	GO:0016322	neuron remodeling	3/185	14/18614	0.000324344	0.00400329	0.00292267	NTN4/APP/SCARF1	3
GO:0035791	BP	GO:0035791	platelet-derived growth factor receptor-beta signaling pathway	3/185	14/18614	0.000324344	0.00400329	0.00292267	PDGFB/PTPN12/HIP1	3
GO:1902287	BP	GO:1902287	semaphorin-plexin signaling pathway involved in axon guidance	3/185	14/18614	0.000324344	0.00400329	0.00292267	NRP1/SEMA3F/ECE1	3
GO:0050886	BP	GO:0050886	endocrine process	6/185	93/18614	0.00033103	0.00406941	0.00297094	GJA1/ACE/RPS6KA2/ECE1/EDNRB/FZD4	6
GO:0007179	BP	GO:0007179	transforming growth factor beta receptor signaling pathway	9/185	218/18614	0.000340755	0.00416857	0.00304333	ITGA8/ITGB5/HIPK2/LRRC32/THBS1/TGFBR2/ZEB1/ENG/CDH5	9
GO:0045229	BP	GO:0045229	external encapsulating structure organization	11/185	317/18614	0.00034182	0.00416857	0.00304333	ADAMTS5/NTN4/ITGA8/SULF1/NOTCH1/ADAMTS1/MATN2/LAMB2/APP/ENG/COL8A1	11
GO:0060317	BP	GO:0060317	cardiac epithelial to mesenchymal transition	4/185	34/18614	0.00034693	0.00419693	0.00306404	NOTCH1/JAG1/TGFBR2/ENG	4
GO:0098801	BP	GO:0098801	regulation of renal system process	4/185	34/18614	0.00034693	0.00419693	0.00306404	GJA5/PDGFB/ACE/EDNRB	4
GO:0019229	BP	GO:0019229	regulation of vasoconstriction	5/185	61/18614	0.000348259	0.00419693	0.00306404	GJA5/CHRM3/BMPR2/ACE/ECE1	5
GO:0014033	BP	GO:0014033	neural crest cell differentiation	6/185	95/18614	0.000371316	0.00445724	0.00325409	SEMA3G/NRP1/JAG1/SEMA3F/SEMA6B/EDNRB	6
GO:0048660	BP	GO:0048660	regulation of smooth muscle cell proliferation	8/185	176/18614	0.000384694	0.00458596	0.00334806	PDGFB/PDGFD/IGFBP5/BMPR2/GJA1/ADAMTS1/THBS1/TGFBR2	8
GO:0006644	BP	GO:0006644	phospholipid metabolic process	12/185	375/18614	0.000385035	0.00458596	0.00334806	PDGFB/ENPP2/PLPP3/SCARB1/DGKH/ADGRF5/PLCB1/PIK3R3/PIK3C2A/SLC44A2/PLPP1/SLC44A1	12
GO:1990806	BP	GO:1990806	ligand-gated ion channel signaling pathway	4/185	35/18614	0.000388674	0.00459954	0.00335798	CHRM3/GNA11/PLCB1/APP	4
GO:0070374	BP	GO:0070374	positive regulation of ERK1 and ERK2 cascade	9/185	222/18614	0.00038918	0.00459954	0.00335798	KDR/PDGFB/PDGFD/RAPGEF2/NRP1/NOTCH1/TEK/APP/FLT4	9
GO:0014909	BP	GO:0014909	smooth muscle cell migration	6/185	97/18614	0.000415338	0.0048898	0.00356989	PDGFB/PDGFD/NRP1/IGFBP5/ACE/ADAMTS1	6
GO:0071560	BP	GO:0071560	cellular response to transforming growth factor beta stimulus	10/185	274/18614	0.000428556	0.0050261	0.00366939	ITGA8/PDGFD/ITGB5/HIPK2/LRRC32/THBS1/TGFBR2/ZEB1/ENG/CDH5	10
GO:1905144	BP	GO:1905144	response to acetylcholine	4/185	36/18614	0.000433887	0.00506919	0.00370085	CHRM3/ROCK2/GNA11/PLCB1	4
GO:0050918	BP	GO:0050918	positive chemotaxis	5/185	64/18614	0.000435747	0.00507157	0.00370259	KDR/PDGFB/CXCL12/NRP1/VEGFC	5
GO:0048659	BP	GO:0048659	smooth muscle cell proliferation	8/185	180/18614	0.000446897	0.00518164	0.00378295	PDGFB/PDGFD/IGFBP5/BMPR2/GJA1/ADAMTS1/THBS1/TGFBR2	8
GO:0048638	BP	GO:0048638	regulation of developmental growth	11/185	328/18614	0.000455548	0.00526201	0.00384162	SEMA3G/CXCL12/NRP1/NOTCH1/BMPR2/PLCB1/SEMA3F/INSR/APP/TGFBR2/SEMA6B	11
GO:0001947	BP	GO:0001947	heart looping	5/185	65/18614	0.000468299	0.00536878	0.00391957	SOX18/NOTCH1/SOX17/TGFBR2/ENG	5
GO:0072577	BP	GO:0072577	endothelial cell apoptotic process	5/185	65/18614	0.000468299	0.00536878	0.00391957	KDR/BMPR2/TEK/THBS1/CDH5	5
GO:1902285	BP	GO:1902285	semaphorin-plexin signaling pathway involved in neuron projection guidance	3/185	16/18614	0.000491736	0.00561643	0.00410037	NRP1/SEMA3F/ECE1	3
GO:0048813	BP	GO:0048813	dendrite morphogenesis	7/185	140/18614	0.000505594	0.00573193	0.0041847	HECW2/RAPGEF2/NRP1/BTBD3/MEF2A/FZD4/PREX2	7
GO:1904019	BP	GO:1904019	epithelial cell apoptotic process	7/185	140/18614	0.000505594	0.00573193	0.0041847	KDR/JAG2/BMPR2/TEK/THBS1/TGFBR2/CDH5	7
GO:0046578	BP	GO:0046578	regulation of Ras protein signal transduction	8/185	184/18614	0.000517035	0.00581854	0.00424793	NRP1/NOTCH1/RASIP1/HEG1/SPRY4/DLC1/GPR4/TNFAIP1	8
GO:0048469	BP	GO:0048469	cell maturation	8/185	184/18614	0.000517035	0.00581854	0.00424793	KDR/NTN4/SOX18/RPS6KA2/APP/EDNRB/SCARF1/EPAS1	8
GO:0032102	BP	GO:0032102	negative regulation of response to external stimulus	13/185	446/18614	0.000536612	0.00601673	0.00439262	SEMA3G/CEACAM1/PDGFB/A2M/NRP1/NOTCH1/PROS1/SEMA3F/TEK/THBS1/SEMA6B/PLK2/CDH5	13
GO:0016358	BP	GO:0016358	dendrite development	9/185	234/18614	0.000569623	0.00636356	0.00464583	HECW2/RAPGEF2/NRP1/BTBD3/APP/MEF2A/SCARF1/FZD4/PREX2	9
GO:0060348	BP	GO:0060348	bone development	9/185	235/18614	0.000587326	0.00652669	0.00476493	RFLNB/KDR/SULF1/DHRS3/BMPR2/GJA1/TGM2/TGFBR2/ENG	9
GO:0001990	BP	GO:0001990	regulation of systemic arterial blood pressure by hormone	4/185	39/18614	0.000591953	0.00652669	0.00476493	ACE/RPS6KA2/ECE1/EDNRB	4
GO:0003198	BP	GO:0003198	epithelial to mesenchymal transition involved in endocardial cushion formation	3/185	17/18614	0.000592754	0.00652669	0.00476493	NOTCH1/TGFBR2/ENG	3
GO:0043129	BP	GO:0043129	surfactant homeostasis	3/185	17/18614	0.000592754	0.00652669	0.00476493	KDR/ADGRF5/EPAS1	3
GO:0003012	BP	GO:0003012	muscle system process	13/185	452/18614	0.000607783	0.00664437	0.00485084	GJA5/SULF1/CHRM3/KCNE3/UTRN/ROCK2/IGFBP5/NOTCH1/GJA1/PIK3C2A/SORBS2/MEF2A/EDNRB	13
GO:0010975	BP	GO:0010975	regulation of neuron projection development	13/185	452/18614	0.000607783	0.00664437	0.00485084	SEMA3G/EFNB2/HECW2/RAPGEF2/CXCL12/NRP1/BMPR2/SEMA3F/SEMA6B/TMEM30A/SCARF1/FZD4/PTPRG	13
GO:0061387	BP	GO:0061387	regulation of extent of cell growth	6/185	105/18614	0.000633633	0.00690231	0.00503915	SEMA3G/CXCL12/NRP1/BMPR2/SEMA3F/SEMA6B	6
GO:0016311	BP	GO:0016311	dephosphorylation	11/185	342/18614	0.000644685	0.00699781	0.00510887	PLPP3/ITGA1/PTPRB/ROCK2/PTPN14/CTTNBP2NL/PTPN12/DLC1/PLPP1/CDH5/PTPRG	11
GO:0072073	BP	GO:0072073	kidney epithelium development	7/185	146/18614	0.00064944	0.0070245	0.00512836	EFNB2/NOTCH1/PBX1/JAG1/PODXL/LAMB2/EDNRB	7
GO:0035886	BP	GO:0035886	vascular associated smooth muscle cell differentiation	4/185	40/18614	0.000652661	0.00703449	0.00513565	PDGFB/NOTCH1/ENG/QKI	4
GO:0061371	BP	GO:0061371	determination of heart left/right asymmetry	5/185	70/18614	0.000659306	0.00708118	0.00516974	SOX18/NOTCH1/SOX17/TGFBR2/ENG	5
GO:0003143	BP	GO:0003143	embryonic heart tube morphogenesis	5/185	71/18614	0.000703611	0.0075306	0.00549785	SOX18/NOTCH1/SOX17/TGFBR2/ENG	5
GO:0016264	BP	GO:0016264	gap junction assembly	3/185	18/18614	0.000706121	0.00753114	0.00549824	GJA5/GJA1/ACE	3
GO:0002691	BP	GO:0002691	regulation of cellular extravasation	4/185	41/18614	0.000717651	0.00760114	0.00554934	PDGFD/CXCL12/PLCB1/JAM3	4
GO:0003203	BP	GO:0003203	endocardial cushion morphogenesis	4/185	41/18614	0.000717651	0.00760114	0.00554934	ADAMTS5/NOTCH1/TGFBR2/ENG	4
GO:0045664	BP	GO:0045664	regulation of neuron differentiation	8/185	194/18614	0.000732001	0.0077264	0.00564079	GPRC5B/CXCL12/NOTCH1/PBX1/JAG1/APP/ZEB1/EDNRB	8
GO:0031345	BP	GO:0031345	negative regulation of cell projection organization	8/185	195/18614	0.000756953	0.00793504	0.00579312	SEMA3G/EFNB2/RAPGEF2/NRP1/MAP4/SEMA3F/SEMA6B/PTPRG	8
GO:0071902	BP	GO:0071902	positive regulation of protein serine/threonine kinase activity	8/185	195/18614	0.000756953	0.00793504	0.00579312	TCIM/FLT1/PDGFB/PDGFD/RAPGEF2/THBS1/INSR/FZD4	8
GO:0018107	BP	GO:0018107	peptidyl-threonine phosphorylation	6/185	109/18614	0.000771689	0.00806191	0.00588574	ROCK2/HIPK2/CDC42BPA/CDC42BPB/APP/TGFBR2	6
GO:0043551	BP	GO:0043551	regulation of phosphatidylinositol 3-kinase activity	4/185	42/18614	0.000787088	0.00819482	0.00598277	FLT1/PDGFB/PIK3R3/TEK	4
GO:0016525	BP	GO:0016525	negative regulation of angiogenesis	7/185	151/18614	0.000792597	0.0082242	0.00600422	SULF1/ROCK2/ADAMTS1/TEK/THBS1/GPR4/PLK2	7
GO:0014812	BP	GO:0014812	muscle cell migration	6/185	110/18614	0.000809579	0.00837203	0.00611214	PDGFB/PDGFD/NRP1/IGFBP5/ACE/ADAMTS1	6
GO:0060039	BP	GO:0060039	pericardium development	3/185	19/18614	0.000832411	0.00855037	0.00624235	DLL4/NOTCH1/HEG1	3
GO:0060977	BP	GO:0060977	coronary vasculature morphogenesis	3/185	19/18614	0.000832411	0.00855037	0.00624235	NRP1/NOTCH1/ACE	3
GO:0003281	BP	GO:0003281	ventricular septum development	5/185	74/18614	0.000849933	0.00867215	0.00633125	GJA5/NOTCH1/HEG1/BMPR2/TGFBR2	5
GO:0045123	BP	GO:0045123	cellular extravasation	5/185	74/18614	0.000849933	0.00867215	0.00633125	ITGA1/PDGFD/CXCL12/PLCB1/JAM3	5
GO:0032535	BP	GO:0032535	regulation of cellular component size	11/185	354/18614	0.000855162	0.00868024	0.00633716	SEMA3G/CXCL12/NRP1/BMPR2/LIMA1/ADD1/SPTBN1/SEMA3F/SEMA6B/ARHGAP18/NCKAP1	11
GO:2000181	BP	GO:2000181	negative regulation of blood vessel morphogenesis	7/185	153/18614	0.000856397	0.00868024	0.00633716	SULF1/ROCK2/ADAMTS1/TEK/THBS1/GPR4/PLK2	7
GO:0006470	BP	GO:0006470	protein dephosphorylation	9/185	249/18614	0.000886286	0.00892409	0.00651519	ITGA1/PTPRB/ROCK2/PTPN14/CTTNBP2NL/PTPN12/DLC1/CDH5/PTPRG	9
GO:0033002	BP	GO:0033002	muscle cell proliferation	9/185	249/18614	0.000886286	0.00892409	0.00651519	PDGFB/PDGFD/IGFBP5/NOTCH1/BMPR2/GJA1/ADAMTS1/THBS1/TGFBR2	9
GO:1901343	BP	GO:1901343	negative regulation of vasculature development	7/185	154/18614	0.000889782	0.00892991	0.00651944	SULF1/ROCK2/ADAMTS1/TEK/THBS1/GPR4/PLK2	7
GO:0043393	BP	GO:0043393	regulation of protein binding	8/185	201/18614	0.000921429	0.0092173	0.00672925	PDGFB/RAPGEF2/NRP1/NES/HIPK2/ADD1/ACE/APP	8
GO:0007200	BP	GO:0007200	phospholipase C-activating G protein-coupled receptor signaling pathway	6/185	113/18614	0.000931912	0.0092918	0.00678364	CHRM3/GNA11/PLCB1/TGM2/GPR4/EDNRB	6
GO:0042491	BP	GO:0042491	inner ear auditory receptor cell differentiation	4/185	44/18614	0.000939966	0.00931144	0.00679798	JAG2/MYO6/NOTCH1/JAG1	4
GO:0090051	BP	GO:0090051	negative regulation of cell migration involved in sprouting angiogenesis	4/185	44/18614	0.000939966	0.00931144	0.00679798	DLL4/NOTCH1/MMRN2/THBS1	4
GO:0045926	BP	GO:0045926	negative regulation of growth	9/185	252/18614	0.000964184	0.00952054	0.00695064	SEMA3G/NRP1/IGFBP5/BMPR2/GJA1/SEMA3F/SOX17/TGFBR2/SEMA6B	9
GO:1902075	BP	GO:1902075	cellular response to salt	8/185	204/18614	0.00101379	0.00997817	0.00728474	PDGFB/CHRM3/ROCK2/GNA11/PLCB1/ADD1/TGM2/MEF2A	8
GO:0001937	BP	GO:0001937	negative regulation of endothelial cell proliferation	5/185	77/18614	0.00101781	0.00998561	0.00729017	FLT1/DLL4/SULF1/MMRN2/THBS1	5
GO:0061564	BP	GO:0061564	axon development	13/185	479/18614	0.00103496	0.0101215	0.00738936	SEMA3G/UNC5B/EFNB2/CXCL12/NRP1/NOTCH1/BMPR2/SEMA3F/LAMB2/APP/ECE1/SEMA6B/SCARF1	13
GO:0022408	BP	GO:0022408	negative regulation of cell-cell adhesion	8/185	205/18614	0.00104617	0.0101985	0.0074456	CEACAM1/CXCL12/NOTCH1/JAG1/PODXL/LRRC32/IDO1/NOTCH4	8
GO:0010633	BP	GO:0010633	negative regulation of epithelial cell migration	6/185	116/18614	0.00106801	0.0103455	0.00755288	DLL4/NOTCH1/MCC/MMRN2/THBS1/PTPRG	6
GO:0072009	BP	GO:0072009	nephron epithelium development	6/185	116/18614	0.00106801	0.0103455	0.00755288	NOTCH1/PBX1/JAG1/PODXL/LAMB2/EDNRB	6
GO:0043087	BP	GO:0043087	regulation of GTPase activity	11/185	364/18614	0.00107148	0.0103464	0.00755355	RASGRP3/RAPGEF2/SIPA1L2/RASIP1/ARHGEF15/RAPGEF4/RAPGEF5/TGM2/ASAP2/ARHGAP29/FGD5	11
GO:2000241	BP	GO:2000241	regulation of reproductive process	8/185	206/18614	0.00107938	0.0103899	0.00758529	SULF1/NOTCH1/JAG1/PLCB1/GJA1/RPS6KA2/INSR/EDNRB	8
GO:0003002	BP	GO:0003002	regionalization	12/185	422/18614	0.00108326	0.0103945	0.00758869	DLL4/SOX18/NRP1/NOTCH1/PBX1/BMPR2/HIPK2/SEMA3F/SOX17/ETS2/TGFBR2/ENG	12
GO:0030517	BP	GO:0030517	negative regulation of axon extension	4/185	46/18614	0.00111262	0.0105399	0.00769482	SEMA3G/NRP1/SEMA3F/SEMA6B	4
GO:0035272	BP	GO:0035272	exocrine system development	4/185	46/18614	0.00111262	0.0105399	0.00769482	NTN4/NRP1/TGM2/INSR	4
GO:0042551	BP	GO:0042551	neuron maturation	4/185	46/18614	0.00111262	0.0105399	0.00769482	NTN4/APP/EDNRB/SCARF1	4
GO:0055010	BP	GO:0055010	ventricular cardiac muscle tissue morphogenesis	4/185	46/18614	0.00111262	0.0105399	0.00769482	DLL4/NOTCH1/HEG1/ENG	4
GO:0043406	BP	GO:0043406	positive regulation of MAP kinase activity	6/185	117/18614	0.0011166	0.0105399	0.00769482	FLT1/PDGFB/PDGFD/THBS1/INSR/FZD4	6
GO:0007213	BP	GO:0007213	G protein-coupled acetylcholine receptor signaling pathway	3/185	21/18614	0.00112595	0.0105399	0.00769482	CHRM3/GNA11/PLCB1	3
GO:0038083	BP	GO:0038083	peptidyl-tyrosine autophosphorylation	3/185	21/18614	0.00112595	0.0105399	0.00769482	KDR/ACE/INSR	3
GO:0060445	BP	GO:0060445	branching involved in salivary gland morphogenesis	3/185	21/18614	0.00112595	0.0105399	0.00769482	NTN4/NRP1/TGM2	3
GO:0035051	BP	GO:0035051	cardiocyte differentiation	7/185	161/18614	0.00115323	0.0107296	0.00783333	EFNB2/SOX18/NOTCH1/JAG1/SORBS2/SOX17/MEF2A	7
GO:0051147	BP	GO:0051147	regulation of muscle cell differentiation	7/185	161/18614	0.00115323	0.0107296	0.00783333	PDGFB/EFNB2/NOTCH1/BMPR2/LAMB2/ZEB1/ENG	7
GO:0051897	BP	GO:0051897	positive regulation of protein kinase B signaling	6/185	118/18614	0.00116687	0.0108236	0.00790199	IGFBP5/TEK/THBS1/INSR/HIP1/ENG	6
GO:0060537	BP	GO:0060537	muscle tissue development	12/185	426/18614	0.00117404	0.0108572	0.00792648	GJA5/ITGA8/DLL4/EFNB2/IGFBP5/NOTCH1/HEG1/GJA1/SORBS2/MEF2A/TGFBR2/ENG	12
GO:0071900	BP	GO:0071900	regulation of protein serine/threonine kinase activity	11/185	369/18614	0.00119552	0.0110094	0.00803763	TCIM/FLT1/PDGFB/PDGFD/RAPGEF2/RASIP1/HEG1/SPRY4/THBS1/INSR/FZD4	11
GO:0007409	BP	GO:0007409	axonogenesis	12/185	427/18614	0.00119769	0.0110094	0.00803763	SEMA3G/UNC5B/EFNB2/CXCL12/NRP1/NOTCH1/BMPR2/SEMA3F/LAMB2/APP/ECE1/SEMA6B	12
GO:0043277	BP	GO:0043277	apoptotic cell clearance	4/185	47/18614	0.00120677	0.0110597	0.0080743	SCARB1/FCN3/TGM2/THBS1	4
GO:0018210	BP	GO:0018210	peptidyl-threonine modification	6/185	119/18614	0.00121886	0.0111371	0.00813086	ROCK2/HIPK2/CDC42BPA/CDC42BPB/APP/TGFBR2	6
GO:0070372	BP	GO:0070372	regulation of ERK1 and ERK2 cascade	10/185	315/18614	0.00124709	0.0113611	0.00829437	KDR/CEACAM1/PDGFB/PDGFD/RAPGEF2/NRP1/NOTCH1/TEK/APP/FLT4	10
GO:0003044	BP	GO:0003044	regulation of systemic arterial blood pressure mediated by a chemical signal	4/185	48/18614	0.00130637	0.0117958	0.00861175	ACE/RPS6KA2/ECE1/EDNRB	4
GO:0045747	BP	GO:0045747	positive regulation of Notch signaling pathway	4/185	48/18614	0.00130637	0.0117958	0.00861175	JAG2/DLL4/NOTCH1/JAG1	4
GO:1903587	BP	GO:1903587	regulation of blood vessel endothelial cell proliferation involved in sprouting angiogenesis	4/185	48/18614	0.00130637	0.0117958	0.00861175	JCAD/DLL4/MMRN2/THBS1	4
GO:0048639	BP	GO:0048639	positive regulation of developmental growth	7/185	165/18614	0.00132914	0.0119662	0.00873611	CXCL12/NRP1/NOTCH1/BMPR2/PLCB1/INSR/TGFBR2	7
GO:0043114	BP	GO:0043114	regulation of vascular permeability	4/185	49/18614	0.00141156	0.0126709	0.00925065	CEACAM1/TEK/GPR4/CDH5	4
GO:0043491	BP	GO:0043491	protein kinase B signaling	8/185	215/18614	0.00141776	0.0126894	0.00926409	KDR/IGFBP5/PIK3R3/TEK/THBS1/INSR/HIP1/ENG	8
GO:1904754	BP	GO:1904754	positive regulation of vascular associated smooth muscle cell migration	3/185	23/18614	0.00147757	0.0131861	0.00962675	PDGFB/IGFBP5/ADAMTS1	3
GO:0042060	BP	GO:0042060	wound healing	12/185	439/18614	0.00151383	0.0134704	0.00983432	KDR/CEACAM1/F8/PDGFB/PLPP3/SCARB1/DGKH/PROS1/NOTCH4/THBS1/TGFBR2/GPR4	12
GO:0030195	BP	GO:0030195	negative regulation of blood coagulation	4/185	50/18614	0.00152253	0.0135086	0.00986217	CEACAM1/PDGFB/PROS1/THBS1	4
GO:0043547	BP	GO:0043547	positive regulation of GTPase activity	9/185	272/18614	0.00163734	0.0144203	0.0105278	RASGRP3/RAPGEF2/SIPA1L2/ARHGEF15/RAPGEF4/RAPGEF5/TGM2/ASAP2/ARHGAP29	9
GO:1900047	BP	GO:1900047	negative regulation of hemostasis	4/185	51/18614	0.00163943	0.0144203	0.0105278	CEACAM1/PDGFB/PROS1/THBS1	4
GO:1904707	BP	GO:1904707	positive regulation of vascular associated smooth muscle cell proliferation	4/185	51/18614	0.00163943	0.0144203	0.0105278	PDGFB/IGFBP5/GJA1/ADAMTS1	4
GO:0035162	BP	GO:0035162	embryonic hemopoiesis	3/185	24/18614	0.00167638	0.0146193	0.0106731	KDR/PBX1/TGFBR2	3
GO:0040037	BP	GO:0040037	negative regulation of fibroblast growth factor receptor signaling pathway	3/185	24/18614	0.00167638	0.0146193	0.0106731	SULF1/SPRY4/THBS1	3
GO:2001026	BP	GO:2001026	regulation of endothelial cell chemotaxis	3/185	24/18614	0.00167638	0.0146193	0.0106731	KDR/NOTCH1/THBS1	3
GO:0001837	BP	GO:0001837	epithelial to mesenchymal transition	7/185	172/18614	0.00168684	0.0146273	0.0106789	RFLNB/ROCK2/NOTCH1/JAG1/NOTCH4/TGFBR2/ENG	7
GO:1990138	BP	GO:1990138	neuron projection extension	7/185	172/18614	0.00168684	0.0146273	0.0106789	SEMA3G/CXCL12/NRP1/BMPR2/SEMA3F/LAMB2/SEMA6B	7
GO:0048593	BP	GO:0048593	camera-type eye morphogenesis	6/185	127/18614	0.00170127	0.0146692	0.0107095	KDR/NOTCH1/JAG1/HIPK2/ZEB1/COL8A1	6
GO:0090288	BP	GO:0090288	negative regulation of cellular response to growth factor stimulus	6/185	127/18614	0.00170127	0.0146692	0.0107095	SULF1/NOTCH1/SPRY4/HIPK2/MMRN2/THBS1	6
GO:0035315	BP	GO:0035315	hair cell differentiation	4/185	52/18614	0.00176242	0.0150891	0.0110161	JAG2/MYO6/NOTCH1/JAG1	4
GO:0051496	BP	GO:0051496	positive regulation of stress fiber assembly	4/185	52/18614	0.00176242	0.0150891	0.0110161	ROCK2/NRP1/ARHGEF15/LIMCH1	4
GO:0061448	BP	GO:0061448	connective tissue development	9/185	275/18614	0.00176476	0.0150891	0.0110161	RFLNB/PDGFB/PDGFD/SULF1/NOTCH1/BMPR2/TGFBR2/ZEB1/GPR4	9
GO:0003071	BP	GO:0003071	renal system process involved in regulation of systemic arterial blood pressure	3/185	25/18614	0.00189114	0.0159515	0.0116457	GJA5/PDGFB/EDNRB	3
GO:0003081	BP	GO:0003081	regulation of systemic arterial blood pressure by renin-angiotensin	3/185	25/18614	0.00189114	0.0159515	0.0116457	ACE/RPS6KA2/EDNRB	3
GO:0003181	BP	GO:0003181	atrioventricular valve morphogenesis	3/185	25/18614	0.00189114	0.0159515	0.0116457	NOTCH1/BMPR2/TGFBR2	3
GO:0050927	BP	GO:0050927	positive regulation of positive chemotaxis	3/185	25/18614	0.00189114	0.0159515	0.0116457	KDR/CXCL12/VEGFC	3
GO:2000648	BP	GO:2000648	positive regulation of stem cell proliferation	4/185	53/18614	0.00189167	0.0159515	0.0116457	KDR/PBX1/GJA1/VEGFC	4
GO:0030509	BP	GO:0030509	BMP signaling pathway	7/185	176/18614	0.00192247	0.0161667	0.0118028	KDR/SULF1/NOTCH1/BMPR2/HIPK2/ENG/CDH5	7
GO:0050900	BP	GO:0050900	leukocyte migration	11/185	393/18614	0.00196711	0.0164967	0.0120437	FLT1/PDGFB/ITGA1/PDGFD/CXCL12/PLCB1/VEGFC/JAM3/THBS1/APP/EDNRB	11
GO:0030048	BP	GO:0030048	actin filament-based movement	6/185	131/18614	0.00199098	0.0166368	0.012146	GJA5/MYO6/KCNE3/MYO1C/GJA1/LIMCH1	6
GO:0051962	BP	GO:0051962	positive regulation of nervous system development	9/185	280/18614	0.00199468	0.0166368	0.012146	CXCL12/NRP1/NOTCH1/BMPR2/VEGFC/ACE/TGM2/FZD4/CLSTN1	9
GO:0030857	BP	GO:0030857	negative regulation of epithelial cell differentiation	4/185	54/18614	0.00202734	0.0167269	0.0122118	NOTCH1/JAG1/NOTCH4/ZEB1	4
GO:0043550	BP	GO:0043550	regulation of lipid kinase activity	4/185	54/18614	0.00202734	0.0167269	0.0122118	FLT1/PDGFB/PIK3R3/TEK	4
GO:0050819	BP	GO:0050819	negative regulation of coagulation	4/185	54/18614	0.00202734	0.0167269	0.0122118	CEACAM1/PDGFB/PROS1/THBS1	4
GO:2000179	BP	GO:2000179	positive regulation of neural precursor cell proliferation	4/185	54/18614	0.00202734	0.0167269	0.0122118	DLL4/NOTCH1/NES/VEGFC	4
GO:0014829	BP	GO:0014829	vascular associated smooth muscle contraction	3/185	26/18614	0.00212229	0.0172316	0.0125802	CHRM3/PIK3C2A/EDNRB	3
GO:0033622	BP	GO:0033622	integrin activation	3/185	26/18614	0.00212229	0.0172316	0.0125802	CXCL12/RASIP1/JAM3	3
GO:0050926	BP	GO:0050926	regulation of positive chemotaxis	3/185	26/18614	0.00212229	0.0172316	0.0125802	KDR/CXCL12/VEGFC	3
GO:0051894	BP	GO:0051894	positive regulation of focal adhesion assembly	3/185	26/18614	0.00212229	0.0172316	0.0125802	KDR/NRP1/TEK	3
GO:0062009	BP	GO:0062009	secondary palate development	3/185	26/18614	0.00212229	0.0172316	0.0125802	JAG2/LRRC32/TGFBR2	3
GO:1903588	BP	GO:1903588	negative regulation of blood vessel endothelial cell proliferation involved in sprouting angiogenesis	3/185	26/18614	0.00212229	0.0172316	0.0125802	DLL4/MMRN2/THBS1	3
GO:0002043	BP	GO:0002043	blood vessel endothelial cell proliferation involved in sprouting angiogenesis	4/185	55/18614	0.00216958	0.0175227	0.0127927	JCAD/DLL4/MMRN2/THBS1	4
GO:0003229	BP	GO:0003229	ventricular cardiac muscle tissue development	4/185	55/18614	0.00216958	0.0175227	0.0127927	DLL4/NOTCH1/HEG1/ENG	4
GO:0070371	BP	GO:0070371	ERK1 and ERK2 cascade	10/185	341/18614	0.00223602	0.0180118	0.0131498	KDR/CEACAM1/PDGFB/PDGFD/RAPGEF2/NRP1/NOTCH1/TEK/APP/FLT4	10
GO:0050769	BP	GO:0050769	positive regulation of neurogenesis	8/185	232/18614	0.00228353	0.0183462	0.0133939	CXCL12/NRP1/NOTCH1/BMPR2/VEGFC/ACE/TGM2/FZD4	8
GO:0010721	BP	GO:0010721	negative regulation of cell development	9/185	286/18614	0.00230154	0.0184424	0.0134642	RFLNB/SEMA3G/CEACAM1/RAPGEF2/NRP1/NOTCH1/SEMA3F/SEMA6B/EDNRB	9
GO:0045995	BP	GO:0045995	regulation of embryonic development	5/185	93/18614	0.00235704	0.0188379	0.0137529	NOTCH1/JAG1/PLCB1/SOX17/INSR	5
GO:0036010	BP	GO:0036010	protein localization to endosome	3/185	27/18614	0.00237024	0.018845	0.0137581	ROCK2/NRP1/TMEM30A	3
GO:0060384	BP	GO:0060384	innervation	3/185	27/18614	0.00237024	0.018845	0.0137581	SULF1/NRP1/ECE1	3
GO:0051492	BP	GO:0051492	regulation of stress fiber assembly	5/185	94/18614	0.00246976	0.0195214	0.014252	ROCK2/NRP1/ARHGEF15/LIMCH1/DLC1	5
GO:0034332	BP	GO:0034332	adherens junction organization	4/185	57/18614	0.00247446	0.0195214	0.014252	EFNB2/ADD1/JAM3/CDH5	4
GO:0072132	BP	GO:0072132	mesenchyme morphogenesis	4/185	57/18614	0.00247446	0.0195214	0.014252	ADAMTS5/NOTCH1/TGFBR2/ENG	4
GO:0043405	BP	GO:0043405	regulation of MAP kinase activity	7/185	186/18614	0.00262358	0.0205946	0.0150354	FLT1/PDGFB/PDGFD/SPRY4/THBS1/INSR/FZD4	7
GO:0003272	BP	GO:0003272	endocardial cushion formation	3/185	28/18614	0.00263542	0.0205946	0.0150354	NOTCH1/TGFBR2/ENG	3
GO:0032878	BP	GO:0032878	regulation of establishment or maintenance of cell polarity	3/185	28/18614	0.00263542	0.0205946	0.0150354	ROCK2/TEK/CDH5	3
GO:0010718	BP	GO:0010718	positive regulation of epithelial to mesenchymal transition	4/185	58/18614	0.0026374	0.0205946	0.0150354	NOTCH1/JAG1/TGFBR2/ENG	4
GO:0071772	BP	GO:0071772	response to BMP	7/185	187/18614	0.00270323	0.0209686	0.0153085	KDR/SULF1/NOTCH1/BMPR2/HIPK2/ENG/CDH5	7
GO:0071773	BP	GO:0071773	cellular response to BMP stimulus	7/185	187/18614	0.00270323	0.0209686	0.0153085	KDR/SULF1/NOTCH1/BMPR2/HIPK2/ENG/CDH5	7
GO:0001666	BP	GO:0001666	response to hypoxia	9/185	293/18614	0.00270585	0.0209686	0.0153085	CXCL12/ROCK2/NOTCH1/HIPK2/VEGFC/ACE/THBS1/TGFBR2/EPAS1	9
GO:0048562	BP	GO:0048562	embryonic organ morphogenesis	9/185	294/18614	0.00276793	0.0213955	0.0156202	ITGA8/SOX18/MYO6/NOTCH1/HIPK2/SOX17/TGFBR2/ZEB1/ENG	9
GO:2000351	BP	GO:2000351	regulation of endothelial cell apoptotic process	4/185	59/18614	0.00280755	0.0216471	0.0158039	KDR/TEK/THBS1/CDH5	4
GO:0008593	BP	GO:0008593	regulation of Notch signaling pathway	5/185	97/18614	0.0028314	0.0217762	0.0158981	TCIM/JAG2/DLL4/NOTCH1/JAG1	5
GO:0030595	BP	GO:0030595	leukocyte chemotaxis	8/185	241/18614	0.00288573	0.0221384	0.0161625	FLT1/PDGFB/ITGA1/CXCL12/VEGFC/JAM3/THBS1/EDNRB	8
GO:0060037	BP	GO:0060037	pharyngeal system development	3/185	29/18614	0.00291819	0.0223315	0.0163035	ADGRF5/BMPR2/ECE1	3
GO:0031099	BP	GO:0031099	regeneration	7/185	190/18614	0.00295339	0.0224884	0.016418	CXCL12/NOTCH1/ACE/PTPN12/LAMB2/TGFBR2/SCARF1	7
GO:0051495	BP	GO:0051495	positive regulation of cytoskeleton organization	7/185	190/18614	0.00295339	0.0224884	0.016418	ROCK2/NRP1/NES/ARHGEF15/LIMCH1/TEK/NCKAP1	7
GO:0006650	BP	GO:0006650	glycerophospholipid metabolic process	9/185	297/18614	0.00296098	0.0224902	0.0164194	PDGFB/ENPP2/SCARB1/DGKH/PLCB1/PIK3R3/PIK3C2A/SLC44A2/SLC44A1	9
GO:0002011	BP	GO:0002011	morphogenesis of an epithelial sheet	4/185	60/18614	0.00298507	0.0225612	0.0164712	CEACAM1/DLL4/NOTCH1/JAG1	4
GO:0055008	BP	GO:0055008	cardiac muscle tissue morphogenesis	4/185	60/18614	0.00298507	0.0225612	0.0164712	DLL4/NOTCH1/HEG1/ENG	4
GO:0030308	BP	GO:0030308	negative regulation of cell growth	7/185	191/18614	0.0030406	0.0229243	0.0167363	SEMA3G/NRP1/BMPR2/GJA1/SEMA3F/SOX17/SEMA6B	7
GO:0010977	BP	GO:0010977	negative regulation of neuron projection development	6/185	143/18614	0.00308623	0.0232112	0.0169457	SEMA3G/EFNB2/NRP1/SEMA3F/SEMA6B/PTPRG	6
GO:0070168	BP	GO:0070168	negative regulation of biomineral tissue development	3/185	30/18614	0.00321894	0.0240909	0.017588	RFLNB/ROCK2/NOTCH1	3
GO:0097254	BP	GO:0097254	renal tubular secretion	3/185	30/18614	0.00321894	0.0240909	0.017588	ACE/ABCG2/EDNRB	3
GO:0048608	BP	GO:0048608	reproductive structure development	9/185	301/18614	0.00323478	0.0241504	0.0176314	KDR/SULF1/A2M/NOTCH1/TNFSF10/ACE/ADAMTS1/INSR/FZD4	9
GO:0001558	BP	GO:0001558	regulation of cell growth	11/185	420/18614	0.00327706	0.0244065	0.0178184	SEMA3G/CEACAM1/CXCL12/NRP1/IGFBP5/BMPR2/GJA1/SEMA3F/SOX17/SEMA6B/CLSTN1	11
GO:0060047	BP	GO:0060047	heart contraction	8/185	247/18614	0.00335152	0.0248066	0.0181105	GJA5/KCNE3/GJA1/ACE/RPS6KA2/MEF2A/EDNRB/EPAS1	8
GO:0032233	BP	GO:0032233	positive regulation of actin filament bundle assembly	4/185	62/18614	0.00336282	0.0248066	0.0181105	ROCK2/NRP1/ARHGEF15/LIMCH1	4
GO:0060113	BP	GO:0060113	inner ear receptor cell differentiation	4/185	62/18614	0.00336282	0.0248066	0.0181105	JAG2/MYO6/NOTCH1/JAG1	4
GO:0050878	BP	GO:0050878	regulation of body fluid levels	10/185	361/18614	0.00336319	0.0248066	0.0181105	CEACAM1/F8/GJA5/PDGFB/CHRM3/DGKH/HEG1/PROS1/THBS1/EDNRB	10
GO:0008585	BP	GO:0008585	female gonad development	5/185	102/18614	0.00351703	0.0256632	0.0187359	KDR/A2M/ADAMTS1/INSR/FZD4	5
GO:0014897	BP	GO:0014897	striated muscle hypertrophy	5/185	102/18614	0.00351703	0.0256632	0.0187359	ROCK2/IGFBP5/NOTCH1/SORBS2/MEF2A	5
GO:0061458	BP	GO:0061458	reproductive system development	9/185	305/18614	0.00352817	0.0256632	0.0187359	KDR/SULF1/A2M/NOTCH1/TNFSF10/ACE/ADAMTS1/INSR/FZD4	9
GO:0002687	BP	GO:0002687	positive regulation of leukocyte migration	6/185	147/18614	0.00353592	0.0256632	0.0187359	PDGFD/CXCL12/VEGFC/JAM3/THBS1/APP	6
GO:0010464	BP	GO:0010464	regulation of mesenchymal cell proliferation	3/185	31/18614	0.00353802	0.0256632	0.0187359	KDR/TGFBR2/ZEB1	3
GO:0095500	BP	GO:0095500	acetylcholine receptor signaling pathway	3/185	31/18614	0.00353802	0.0256632	0.0187359	CHRM3/GNA11/PLCB1	3
GO:0150117	BP	GO:0150117	positive regulation of cell-substrate junction organization	3/185	31/18614	0.00353802	0.0256632	0.0187359	KDR/NRP1/TEK	3
GO:0036293	BP	GO:0036293	response to decreased oxygen levels	9/185	306/18614	0.00360469	0.026085	0.0190438	CXCL12/ROCK2/NOTCH1/HIPK2/VEGFC/ACE/THBS1/TGFBR2/EPAS1	9
GO:0006066	BP	GO:0006066	alcohol metabolic process	10/185	366/18614	0.00370585	0.0267324	0.0195164	PLPP3/SCARB1/OSBPL1A/DHRS3/PLCB1/LIMA1/APP/EDNRB/SCARF1/PLPP1	10
GO:0043434	BP	GO:0043434	response to peptide hormone	11/185	427/18614	0.00371162	0.0267324	0.0195164	CEACAM1/CXCL12/ROCK2/IGFBP5/TNFSF10/MYO1C/PLCB1/PIK3R3/PIK3C2A/INSR/EDNRB	11
GO:0008064	BP	GO:0008064	regulation of actin polymerization or depolymerization	6/185	149/18614	0.00377822	0.0271047	0.0197883	CXCL12/LIMA1/ADD1/SPTBN1/ARHGAP18/NCKAP1	6
GO:0022407	BP	GO:0022407	regulation of cell-cell adhesion	12/185	491/18614	0.00378103	0.0271047	0.0197883	CEACAM1/PLPP3/EFNB2/CXCL12/NOTCH1/JAG1/PODXL/LRRC32/IDO1/NOTCH4/TGFBR2/MYO10	12
GO:0014896	BP	GO:0014896	muscle hypertrophy	5/185	104/18614	0.00382207	0.0272712	0.0199098	ROCK2/IGFBP5/NOTCH1/SORBS2/MEF2A	5
GO:0110020	BP	GO:0110020	regulation of actomyosin structure organization	5/185	104/18614	0.00382207	0.0272712	0.0199098	ROCK2/NRP1/ARHGEF15/LIMCH1/DLC1	5
GO:0007435	BP	GO:0007435	salivary gland morphogenesis	3/185	32/18614	0.00387575	0.0275259	0.0200958	NTN4/NRP1/TGM2	3
GO:0043552	BP	GO:0043552	positive regulation of phosphatidylinositol 3-kinase activity	3/185	32/18614	0.00387575	0.0275259	0.0200958	FLT1/PDGFB/TEK	3
GO:0050768	BP	GO:0050768	negative regulation of neurogenesis	6/185	150/18614	0.00390389	0.0276616	0.0201948	SEMA3G/RAPGEF2/NRP1/NOTCH1/SEMA3F/SEMA6B	6
GO:1905330	BP	GO:1905330	regulation of morphogenesis of an epithelium	4/185	65/18614	0.00398849	0.0281958	0.0205848	NTN4/SULF1/GJA1/MMRN2	4
GO:0010720	BP	GO:0010720	positive regulation of cell development	11/185	432/18614	0.00404939	0.0285603	0.020851	CXCL12/NRP1/NOTCH1/BMPR2/ADD1/VEGFC/ACE/TGM2/TGFBR2/CDH5/FZD4	11
GO:0050730	BP	GO:0050730	regulation of peptidyl-tyrosine phosphorylation	8/185	255/18614	0.00406112	0.0285772	0.0208633	PDGFB/ENPP2/PLPP3/PDGFD/GPRC5B/NRP1/ACE/APP	8
GO:0071674	BP	GO:0071674	mononuclear cell migration	7/185	202/18614	0.00413546	0.0285968	0.0208776	FLT1/PDGFB/PDGFD/CXCL12/PLCB1/THBS1/APP	7
GO:0046545	BP	GO:0046545	development of primary female sexual characteristics	5/185	106/18614	0.00414561	0.0285968	0.0208776	KDR/A2M/ADAMTS1/INSR/FZD4	5
GO:0030832	BP	GO:0030832	regulation of actin filament length	6/185	152/18614	0.0041645	0.0285968	0.0208776	CXCL12/LIMA1/ADD1/SPTBN1/ARHGAP18/NCKAP1	6
GO:0003093	BP	GO:0003093	regulation of glomerular filtration	2/185	10/18614	0.00419527	0.0285968	0.0208776	GJA5/PDGFB	2
GO:0006707	BP	GO:0006707	cholesterol catabolic process	2/185	10/18614	0.00419527	0.0285968	0.0208776	SCARB1/SCARF1	2
GO:0007440	BP	GO:0007440	foregut morphogenesis	2/185	10/18614	0.00419527	0.0285968	0.0208776	NOTCH1/SOX17	2
GO:0016127	BP	GO:0016127	sterol catabolic process	2/185	10/18614	0.00419527	0.0285968	0.0208776	SCARB1/SCARF1	2
GO:0021561	BP	GO:0021561	facial nerve development	2/185	10/18614	0.00419527	0.0285968	0.0208776	NRP1/SEMA3F	2
GO:0021604	BP	GO:0021604	cranial nerve structural organization	2/185	10/18614	0.00419527	0.0285968	0.0208776	NRP1/SEMA3F	2
GO:0021610	BP	GO:0021610	facial nerve morphogenesis	2/185	10/18614	0.00419527	0.0285968	0.0208776	NRP1/SEMA3F	2
GO:0035907	BP	GO:0035907	dorsal aorta development	2/185	10/18614	0.00419527	0.0285968	0.0208776	DLL4/ENG	2
GO:0048865	BP	GO:0048865	stem cell fate commitment	2/185	10/18614	0.00419527	0.0285968	0.0208776	SOX18/SOX17	2
GO:0061626	BP	GO:0061626	pharyngeal arch artery morphogenesis	2/185	10/18614	0.00419527	0.0285968	0.0208776	ADGRF5/BMPR2	2
GO:2000048	BP	GO:2000048	negative regulation of cell-cell adhesion mediated by cadherin	2/185	10/18614	0.00419527	0.0285968	0.0208776	NOTCH1/NOTCH4	2
GO:0031100	BP	GO:0031100	animal organ regeneration	4/185	66/18614	0.00421338	0.0285968	0.0208776	CXCL12/NOTCH1/ACE/TGFBR2	4
GO:0050771	BP	GO:0050771	negative regulation of axonogenesis	4/185	66/18614	0.00421338	0.0285968	0.0208776	SEMA3G/NRP1/SEMA3F/SEMA6B	4
GO:0090279	BP	GO:0090279	regulation of calcium ion import	3/185	33/18614	0.00423248	0.0286629	0.0209258	PDGFB/CXCL12/ACE	3
GO:0046718	BP	GO:0046718	viral entry into host cell	6/185	153/18614	0.00429952	0.0290526	0.0212104	EFNB2/SCARB1/FCN3/ITGB5/NRP1/INSR	6
GO:1902414	BP	GO:1902414	protein localization to cell junction	5/185	107/18614	0.00431451	0.0290897	0.0212374	HEG1/JAM3/NETO2/CDH5/CLSTN1	5
GO:0042490	BP	GO:0042490	mechanoreceptor differentiation	4/185	67/18614	0.00444669	0.029915	0.0218399	JAG2/MYO6/NOTCH1/JAG1	4
GO:0003015	BP	GO:0003015	heart process	8/185	259/18614	0.00445682	0.0299174	0.0218417	GJA5/KCNE3/GJA1/ACE/RPS6KA2/MEF2A/EDNRB/EPAS1	8
GO:0032231	BP	GO:0032231	regulation of actin filament bundle assembly	5/185	108/18614	0.00448827	0.0300625	0.0219477	ROCK2/NRP1/ARHGEF15/LIMCH1/DLC1	5
GO:0050770	BP	GO:0050770	regulation of axonogenesis	6/185	155/18614	0.00457924	0.0305338	0.0222917	SEMA3G/CXCL12/NRP1/BMPR2/SEMA3F/SEMA6B	6
GO:0007431	BP	GO:0007431	salivary gland development	3/185	34/18614	0.0046085	0.0305338	0.0222917	NTN4/NRP1/TGM2	3
GO:0030511	BP	GO:0030511	positive regulation of transforming growth factor beta receptor signaling pathway	3/185	34/18614	0.0046085	0.0305338	0.0222917	ITGA8/HIPK2/THBS1	3
GO:0046475	BP	GO:0046475	glycerophospholipid catabolic process	3/185	34/18614	0.0046085	0.0305338	0.0222917	ENPP2/SCARB1/PLCB1	3
GO:1903846	BP	GO:1903846	positive regulation of cellular response to transforming growth factor beta stimulus	3/185	34/18614	0.0046085	0.0305338	0.0222917	ITGA8/HIPK2/THBS1	3
GO:0048645	BP	GO:0048645	animal organ formation	4/185	68/18614	0.00468854	0.030997	0.0226299	SULF1/NOTCH1/SOX17/TGFBR2	4
GO:0048732	BP	GO:0048732	gland development	11/185	441/18614	0.004719	0.0310973	0.0227031	CEACAM1/NTN4/SULF1/NRP1/IGFBP5/NOTCH1/PBX1/TGM2/NOTCH4/INSR/TGFBR2	11
GO:0051961	BP	GO:0051961	negative regulation of nervous system development	6/185	156/18614	0.00472402	0.0310973	0.0227031	SEMA3G/RAPGEF2/NRP1/NOTCH1/SEMA3F/SEMA6B	6
GO:0048592	BP	GO:0048592	eye morphogenesis	6/185	157/18614	0.00487215	0.0320036	0.0233648	KDR/NOTCH1/JAG1/HIPK2/ZEB1/COL8A1	6
GO:0035633	BP	GO:0035633	maintenance of blood-brain barrier	3/185	35/18614	0.00500411	0.0325537	0.0237664	GJA1/JAM3/CDH5	3
GO:0045773	BP	GO:0045773	positive regulation of axon extension	3/185	35/18614	0.00500411	0.0325537	0.0237664	CXCL12/NRP1/BMPR2	3
GO:2000352	BP	GO:2000352	negative regulation of endothelial cell apoptotic process	3/185	35/18614	0.00500411	0.0325537	0.0237664	KDR/TEK/CDH5	3
GO:1902074	BP	GO:1902074	response to salt	10/185	383/18614	0.00508297	0.0325537	0.0237664	PDGFB/CHRM3/ROCK2/GNA11/PLCB1/ADD1/TGM2/THBS1/MEF2A/EDNRB	10
GO:0001867	BP	GO:0001867	complement activation, lectin pathway	2/185	11/18614	0.00509416	0.0325537	0.0237664	FCN3/A2M	2
GO:0003183	BP	GO:0003183	mitral valve morphogenesis	2/185	11/18614	0.00509416	0.0325537	0.0237664	NOTCH1/BMPR2	2
GO:0021559	BP	GO:0021559	trigeminal nerve development	2/185	11/18614	0.00509416	0.0325537	0.0237664	NRP1/SEMA3F	2
GO:0032836	BP	GO:0032836	glomerular basement membrane development	2/185	11/18614	0.00509416	0.0325537	0.0237664	SULF1/LAMB2	2
GO:0048505	BP	GO:0048505	regulation of timing of cell differentiation	2/185	11/18614	0.00509416	0.0325537	0.0237664	NOTCH1/JAG1	2
GO:0072124	BP	GO:0072124	regulation of glomerular mesangial cell proliferation	2/185	11/18614	0.00509416	0.0325537	0.0237664	PDGFB/PDGFD	2
GO:0086100	BP	GO:0086100	endothelin receptor signaling pathway	2/185	11/18614	0.00509416	0.0325537	0.0237664	GNA11/EDNRB	2
GO:1905651	BP	GO:1905651	regulation of artery morphogenesis	2/185	11/18614	0.00509416	0.0325537	0.0237664	EFNB2/NOTCH1	2
GO:1990535	BP	GO:1990535	neuron projection maintenance	2/185	11/18614	0.00509416	0.0325537	0.0237664	INSR/APP	2
GO:0030193	BP	GO:0030193	regulation of blood coagulation	4/185	70/18614	0.00519847	0.0331511	0.0242025	CEACAM1/PDGFB/PROS1/THBS1	4
GO:0044409	BP	GO:0044409	entry into host	6/185	160/18614	0.00533705	0.0339641	0.0247961	EFNB2/SCARB1/FCN3/ITGB5/NRP1/INSR	6
GO:0003161	BP	GO:0003161	cardiac conduction system development	3/185	36/18614	0.00541958	0.0342755	0.0250234	GJA5/NOTCH1/GJA1	3
GO:0090218	BP	GO:0090218	positive regulation of lipid kinase activity	3/185	36/18614	0.00541958	0.0342755	0.0250234	FLT1/PDGFB/TEK	3
GO:1903725	BP	GO:1903725	regulation of phospholipid metabolic process	3/185	36/18614	0.00541958	0.0342755	0.0250234	PDGFB/SCARB1/ADGRF5	3
GO:0006939	BP	GO:0006939	smooth muscle contraction	5/185	113/18614	0.00543244	0.034286	0.0250311	SULF1/CHRM3/ROCK2/PIK3C2A/EDNRB	5
GO:0090596	BP	GO:0090596	sensory organ morphogenesis	8/185	269/18614	0.0055761	0.0351202	0.0256402	KDR/ITGA8/MYO6/NOTCH1/JAG1/HIPK2/ZEB1/COL8A1	8
GO:0007173	BP	GO:0007173	epidermal growth factor receptor signaling pathway	5/185	114/18614	0.00563688	0.0354302	0.0258664	CEACAM1/ITGA1/PIK3C2A/PTPN12/HIP1	5
GO:0014743	BP	GO:0014743	regulation of muscle hypertrophy	4/185	72/18614	0.00574428	0.0358841	0.0261979	ROCK2/IGFBP5/NOTCH1/MEF2A	4
GO:0045665	BP	GO:0045665	negative regulation of neuron differentiation	4/185	72/18614	0.00574428	0.0358841	0.0261979	NOTCH1/PBX1/JAG1/APP	4
GO:1900046	BP	GO:1900046	regulation of hemostasis	4/185	72/18614	0.00574428	0.0358841	0.0261979	CEACAM1/PDGFB/PROS1/THBS1	4
GO:0009612	BP	GO:0009612	response to mechanical stimulus	7/185	215/18614	0.00578804	0.0360839	0.0263437	PIEZO2/MEIS2/TMEM150C/CXCL12/THBS1/TGFBR2/ENG	7
GO:0031076	BP	GO:0031076	embryonic camera-type eye development	3/185	37/18614	0.00585519	0.0364283	0.0265951	NES/HIPK2/ZEB1	3
GO:0060415	BP	GO:0060415	muscle tissue morphogenesis	4/185	73/18614	0.00603097	0.036812	0.0268753	DLL4/NOTCH1/HEG1/ENG	4
GO:0048640	BP	GO:0048640	negative regulation of developmental growth	5/185	116/18614	0.00606195	0.036812	0.0268753	SEMA3G/NRP1/SEMA3F/TGFBR2/SEMA6B	5
GO:0001553	BP	GO:0001553	luteinization	2/185	12/18614	0.0060732	0.036812	0.0268753	A2M/FZD4	2
GO:0002645	BP	GO:0002645	positive regulation of tolerance induction	2/185	12/18614	0.0060732	0.036812	0.0268753	IDO1/TGFBR2	2
GO:0040034	BP	GO:0040034	regulation of development, heterochronic	2/185	12/18614	0.0060732	0.036812	0.0268753	NOTCH1/JAG1	2
GO:0042447	BP	GO:0042447	hormone catabolic process	2/185	12/18614	0.0060732	0.036812	0.0268753	ACE/ECE1	2
GO:0060312	BP	GO:0060312	regulation of blood vessel remodeling	2/185	12/18614	0.0060732	0.036812	0.0268753	CEACAM1/FLT4	2
GO:0072017	BP	GO:0072017	distal tubule development	2/185	12/18614	0.0060732	0.036812	0.0268753	NOTCH1/JAG1	2
GO:0072110	BP	GO:0072110	glomerular mesangial cell proliferation	2/185	12/18614	0.0060732	0.036812	0.0268753	PDGFB/PDGFD	2
GO:0097048	BP	GO:0097048	dendritic cell apoptotic process	2/185	12/18614	0.0060732	0.036812	0.0268753	RAPGEF2/CXCL12	2
GO:0097084	BP	GO:0097084	vascular associated smooth muscle cell development	2/185	12/18614	0.0060732	0.036812	0.0268753	NOTCH1/ENG	2
GO:1902946	BP	GO:1902946	protein localization to early endosome	2/185	12/18614	0.0060732	0.036812	0.0268753	ROCK2/NRP1	2
GO:2000668	BP	GO:2000668	regulation of dendritic cell apoptotic process	2/185	12/18614	0.0060732	0.036812	0.0268753	RAPGEF2/CXCL12	2
GO:0070482	BP	GO:0070482	response to oxygen levels	9/185	333/18614	0.00621243	0.0375815	0.027437	CXCL12/ROCK2/NOTCH1/HIPK2/VEGFC/ACE/THBS1/TGFBR2/EPAS1	9
GO:0040036	BP	GO:0040036	regulation of fibroblast growth factor receptor signaling pathway	3/185	38/18614	0.00631117	0.0381036	0.0278182	SULF1/SPRY4/THBS1	3
GO:0030900	BP	GO:0030900	forebrain development	10/185	397/18614	0.00649488	0.0391355	0.0285715	RAPGEF2/CXCL12/NRP1/NOTCH1/PLCB1/DLC1/BTBD3/APP/SEMA6B/ZEB1	10
GO:0042058	BP	GO:0042058	regulation of epidermal growth factor receptor signaling pathway	4/185	75/18614	0.00663258	0.0397306	0.029006	CEACAM1/ITGA1/PTPN12/HIP1	4
GO:0050818	BP	GO:0050818	regulation of coagulation	4/185	75/18614	0.00663258	0.0397306	0.029006	CEACAM1/PDGFB/PROS1/THBS1	4
GO:0120192	BP	GO:0120192	tight junction assembly	4/185	75/18614	0.00663258	0.0397306	0.029006	ROCK2/MYO1C/MPDZ/CDH5	4
GO:0043583	BP	GO:0043583	ear development	7/185	221/18614	0.00669888	0.0400493	0.0292387	JAG2/ITGA8/MYO6/NOTCH1/JAG1/ECE1/ZEB1	7
GO:0030278	BP	GO:0030278	regulation of ossification	5/185	119/18614	0.00674112	0.0402233	0.0293657	RFLNB/NOTCH1/PBX1/DHRS3/BMPR2	5
GO:0007588	BP	GO:0007588	excretion	3/185	39/18614	0.00678778	0.0403444	0.0294542	ACE/ABCG2/EDNRB	3
GO:0098926	BP	GO:0098926	postsynaptic signal transduction	3/185	39/18614	0.00678778	0.0403444	0.0294542	CHRM3/GNA11/PLCB1	3
GO:0046470	BP	GO:0046470	phosphatidylcholine metabolic process	4/185	76/18614	0.00694776	0.0412153	0.03009	ENPP2/SCARB1/SLC44A2/SLC44A1	4
GO:0002664	BP	GO:0002664	regulation of T cell tolerance induction	2/185	13/18614	0.00713074	0.0421375	0.0307632	IDO1/TGFBR2	2
GO:0048012	BP	GO:0048012	hepatocyte growth factor receptor signaling pathway	2/185	13/18614	0.00713074	0.0421375	0.0307632	ESM1/NRP1	2
GO:0001953	BP	GO:0001953	negative regulation of cell-matrix adhesion	3/185	40/18614	0.00728522	0.0429673	0.0313691	JAG1/DLC1/THBS1	3
GO:1902905	BP	GO:1902905	positive regulation of supramolecular fiber organization	6/185	171/18614	0.0073223	0.043103	0.0314681	ROCK2/NRP1/ARHGEF15/LIMCH1/APP/NCKAP1	6
GO:0046660	BP	GO:0046660	female sex differentiation	5/185	122/18614	0.00747188	0.043815	0.0319879	KDR/A2M/ADAMTS1/INSR/FZD4	5
GO:0071675	BP	GO:0071675	regulation of mononuclear cell migration	5/185	122/18614	0.00747188	0.043815	0.0319879	PDGFD/CXCL12/PLCB1/THBS1/APP	5
GO:0007548	BP	GO:0007548	sex differentiation	8/185	283/18614	0.00748895	0.0438311	0.0319997	KDR/A2M/TNFSF10/PBX1/ACE/ADAMTS1/INSR/FZD4	8
GO:0007163	BP	GO:0007163	establishment or maintenance of cell polarity	7/185	226/18614	0.00753604	0.0440225	0.0321394	ROCK2/GJA1/MAP4/CDC42BPB/JAM3/TEK/CDH5	7
GO:0061045	BP	GO:0061045	negative regulation of wound healing	4/185	78/18614	0.00760749	0.0443553	0.0323824	CEACAM1/PDGFB/PROS1/THBS1	4
GO:0002685	BP	GO:0002685	regulation of leukocyte migration	7/185	227/18614	0.00771236	0.0448812	0.0327663	PDGFD/CXCL12/PLCB1/VEGFC/JAM3/THBS1/APP	7
GO:0043244	BP	GO:0043244	regulation of protein-containing complex disassembly	5/185	123/18614	0.00772727	0.0448827	0.0327674	NES/LIMA1/ADD1/SPTBN1/INSR	5
GO:0008406	BP	GO:0008406	gonad development	7/185	228/18614	0.00789171	0.045751	0.0334013	KDR/A2M/TNFSF10/ACE/ADAMTS1/INSR/FZD4	7
GO:0032486	BP	GO:0032486	Rap protein signal transduction	2/185	14/18614	0.00826514	0.0477351	0.0348499	RAPGEF2/PLK2	2
GO:0050930	BP	GO:0050930	induction of positive chemotaxis	2/185	14/18614	0.00826514	0.0477351	0.0348499	CXCL12/VEGFC	2
GO:0043537	BP	GO:0043537	negative regulation of blood vessel endothelial cell migration	4/185	80/18614	0.00830719	0.0477976	0.0348955	DLL4/NOTCH1/MMRN2/THBS1	4
GO:0048644	BP	GO:0048644	muscle organ morphogenesis	4/185	80/18614	0.00830719	0.0477976	0.0348955	DLL4/NOTCH1/HEG1/ENG	4
GO:0006936	BP	GO:0006936	muscle contraction	9/185	349/18614	0.00833162	0.0478482	0.0349324	GJA5/SULF1/CHRM3/KCNE3/UTRN/ROCK2/GJA1/PIK3C2A/EDNRB	9
GO:0051099	BP	GO:0051099	positive regulation of binding	6/185	176/18614	0.00838182	0.0480463	0.0350771	RAPGEF2/NRP1/HIPK2/ADD1/ACE/APP	6
GO:0008344	BP	GO:0008344	adult locomotory behavior	4/185	81/18614	0.00867232	0.0495261	0.0361574	CXCL12/HIPK2/APP/PREX2	4
GO:0120193	BP	GO:0120193	tight junction organization	4/185	81/18614	0.00867232	0.0495261	0.0361574	ROCK2/MYO1C/MPDZ/CDH5	4
GO:0045121	CC	GO:0045121	membrane raft	21/191	323/19518	8.06943e-12	1.06953e-09	8.01584e-10	CAVIN2/CAVIN1/KDR/UNC5B/PLPP3/ITGA1/SCARB1/SULF1/KCNE3/MYO1C/BMPR2/PODXL/GJA1/ABCG2/DLC1/TEK/INSR/APP/TGFBR2/EDNRB/PLPP1	21
GO:0098857	CC	GO:0098857	membrane microdomain	21/191	324/19518	8.55624e-12	1.06953e-09	8.01584e-10	CAVIN2/CAVIN1/KDR/UNC5B/PLPP3/ITGA1/SCARB1/SULF1/KCNE3/MYO1C/BMPR2/PODXL/GJA1/ABCG2/DLC1/TEK/INSR/APP/TGFBR2/EDNRB/PLPP1	21
GO:0031252	CC	GO:0031252	cell leading edge	21/191	422/19518	1.12443e-09	9.37025e-08	7.02276e-08	JCAD/ITGA8/MYO6/MYO1C/SPRY4/MCC/PODXL/LIMA1/CTTNBP2NL/ARHGAP31/SORBS2/CDC42BPA/DLC1/CDC42BPB/SPTBN1/INSR/APP/ARHGAP18/MYO10/NCKAP1/FGD5	21
GO:0005925	CC	GO:0005925	focal adhesion	20/191	422/19518	6.57156e-09	4.10723e-07	3.07826e-07	FLT1/ITGA8/EFNB2/ITGA1/ITGB5/NRP1/SPRY4/PPFIBP1/GJA1/LIMA1/ADD1/ARHGAP31/SHROOM4/SORBS2/PTPN12/DLC1/TGM2/TEK/ENG/NCKAP1	20
GO:0030055	CC	GO:0030055	cell-substrate junction	20/191	432/19518	9.74867e-09	4.44538e-07	3.33169e-07	FLT1/ITGA8/EFNB2/ITGA1/ITGB5/NRP1/SPRY4/PPFIBP1/GJA1/LIMA1/ADD1/ARHGAP31/SHROOM4/SORBS2/PTPN12/DLC1/TGM2/TEK/ENG/NCKAP1	20
GO:0031253	CC	GO:0031253	cell projection membrane	18/191	349/19518	1.06689e-08	4.44538e-07	3.33169e-07	JCAD/CEACAM1/ITGA8/MYO6/UTRN/DHRS3/MYO1C/SPRY4/PODXL/LIMA1/ACE/ABCG2/DLC1/SPTBN1/INSR/MYO10/NCKAP1/FGD5	18
GO:0015629	CC	GO:0015629	actin cytoskeleton	20/191	489/19518	7.55701e-08	2.69893e-06	2.02278e-06	RFLNB/FLT1/MYO6/DGKH/MYO1C/LIMCH1/LIMA1/ADD1/CTTNBP2NL/SHROOM4/SORBS2/PTPN12/CDC42BPA/DLC1/CDC42BPB/SPTBN1/JAM3/TEK/MYO10/NCKAP1	20
GO:0009897	CC	GO:0009897	external side of plasma membrane	18/191	426/19518	2.17626e-07	6.80082e-06	5.09703e-06	KDR/BTNL9/ITGA8/ITGA1/FCN3/CXCL12/IL3RA/HEG1/ACE/ABCG2/LIFR/THBS1/INSR/ECE1/TGFBR2/ENG/CLEC14A/CDH5	18
GO:0062023	CC	GO:0062023	collagen-containing extracellular matrix	17/191	415/19518	7.37842e-07	2.04956e-05	1.53609e-05	ADAMTS5/PDGFB/NTN4/FCN3/SULF1/CXCL12/A2M/ITIH5/MMRN2/ADAMTS1/MATN2/TGM2/THBS1/COL21A1/LAMB2/CLEC14A/COL8A1	17
GO:0005901	CC	GO:0005901	caveola	8/191	83/19518	1.53035e-06	3.82588e-05	2.8674e-05	CAVIN2/CAVIN1/SCARB1/BMPR2/DLC1/INSR/TGFBR2/PLPP1	8
GO:0001726	CC	GO:0001726	ruffle	11/191	181/19518	1.74927e-06	3.97562e-05	2.97962e-05	JCAD/MYO6/MYO1C/SPRY4/PODXL/LIMA1/DLC1/ARHGAP18/MYO10/NCKAP1/FGD5	11
GO:0005912	CC	GO:0005912	adherens junction	11/191	185/19518	2.16542e-06	4.5113e-05	3.3811e-05	JCAD/CEACAM1/PLPP3/EFNB2/NOTCH1/TMEM47/JAG1/BMPR2/ADD1/SHROOM4/CDH5	11
GO:0031091	CC	GO:0031091	platelet alpha granule	8/191	91/19518	3.08484e-06	5.93238e-05	4.44616e-05	F8/PDGFB/A2M/VEGFC/PROS1/THBS1/APP/PHACTR2	8
GO:0031093	CC	GO:0031093	platelet alpha granule lumen	7/191	67/19518	4.07722e-06	7.28075e-05	5.45673e-05	F8/PDGFB/A2M/VEGFC/PROS1/THBS1/APP	7
GO:0030027	CC	GO:0030027	lamellipodium	11/191	202/19518	5.06187e-06	8.43645e-05	6.3229e-05	MCC/PODXL/CTTNBP2NL/ARHGAP31/SORBS2/CDC42BPA/CDC42BPB/APP/MYO10/NCKAP1/FGD5	11
GO:0045177	CC	GO:0045177	apical part of cell	16/191	446/19518	8.58065e-06	0.000134073	0.000100484	CEACAM1/ITGA8/RAPGEF2/NOTCH1/ADGRF5/JAG1/PODXL/GJA1/SHROOM4/SORBS2/ABCG2/TEK/APP/MPDZ/TMEM30A/PLPP1	16
GO:0031256	CC	GO:0031256	leading edge membrane	10/191	180/19518	1.15226e-05	0.000169449	0.000126998	JCAD/ITGA8/MYO6/MYO1C/SPRY4/DLC1/SPTBN1/INSR/NCKAP1/FGD5	10
GO:0044853	CC	GO:0044853	plasma membrane raft	8/191	114/19518	1.64971e-05	0.000229127	0.000171724	CAVIN2/CAVIN1/SCARB1/BMPR2/DLC1/INSR/TGFBR2/PLPP1	8
GO:0098636	CC	GO:0098636	protein complex involved in cell adhesion	6/191	57/19518	1.94583e-05	0.00025603	0.000191888	ITGA8/ITGA1/ITGB5/MMRN2/JAM3/LAMB2	6
GO:0042641	CC	GO:0042641	actomyosin	6/191	76/19518	0.000100517	0.00120898	0.000906096	LIMCH1/LIMA1/SHROOM4/CDC42BPA/CDC42BPB/TEK	6
GO:0016324	CC	GO:0016324	apical plasma membrane	13/191	381/19518	0.000101554	0.00120898	0.000906096	CEACAM1/RAPGEF2/NOTCH1/JAG1/PODXL/GJA1/SHROOM4/SORBS2/ABCG2/TEK/MPDZ/TMEM30A/PLPP1	13
GO:0031941	CC	GO:0031941	filamentous actin	4/191	27/19518	0.000130751	0.00148581	0.00111357	MYO6/MYO1C/JAM3/NCKAP1	4
GO:0098858	CC	GO:0098858	actin-based cell projection	9/191	225/19518	0.000385302	0.00418807	0.00313885	CEACAM1/MYO6/UTRN/MYO1C/PODXL/JAM3/TEK/APP/MYO10	9
GO:0032587	CC	GO:0032587	ruffle membrane	6/191	101/19518	0.000476277	0.00496122	0.00371831	JCAD/MYO6/MYO1C/SPRY4/DLC1/FGD5	6
GO:0045178	CC	GO:0045178	basal part of cell	10/191	285/19518	0.000519199	0.00519199	0.00389126	CEACAM1/PDGFB/PLPP3/ITGA1/CHRM3/KCNE3/MYO1C/ACE/SHROOM4/TEK	10
GO:0005884	CC	GO:0005884	actin filament	6/191	105/19518	0.000585644	0.00563119	0.00422043	MYO6/MYO1C/SHROOM4/JAM3/TEK/NCKAP1	6
GO:0098978	CC	GO:0098978	glutamatergic synapse	12/191	410/19518	0.000743634	0.0068855	0.0051605	ITGA8/EFNB2/NRP1/ARHGEF15/PLCB1/SPTBN1/SEMA3F/HIP1/NETO2/PCDH17/FZD4/CLSTN1	12
GO:0032432	CC	GO:0032432	actin filament bundle	5/191	78/19518	0.00100867	0.00895103	0.00670856	RFLNB/LIMCH1/LIMA1/SHROOM4/TEK	5
GO:0005788	CC	GO:0005788	endoplasmic reticulum lumen	10/191	312/19518	0.00103832	0.00895103	0.00670856	ADAMTS5/F8/PDGFB/PDGFD/IGFBP5/THBS1/COL21A1/LAMB2/APP/COL8A1	10
GO:0005604	CC	GO:0005604	basement membrane	5/191	84/19518	0.00140714	0.0117261	0.00878844	NTN4/MMRN2/ADAMTS1/LAMB2/COL8A1	5
GO:0045211	CC	GO:0045211	postsynaptic membrane	9/191	277/19518	0.001675	0.013508	0.0101239	ITGA8/EFNB2/CHRM3/UTRN/NRP1/HIP1/NETO2/PCDH17/CLSTN1	9
GO:0005902	CC	GO:0005902	microvillus	5/191	94/19518	0.00231327	0.0180724	0.0135448	CEACAM1/MYO1C/PODXL/JAM3/TEK	5
GO:0032589	CC	GO:0032589	neuron projection membrane	4/191	60/19518	0.00282636	0.0214118	0.0160476	ITGA8/MYO1C/SPTBN1/INSR	4
GO:0008305	CC	GO:0008305	integrin complex	3/191	31/19518	0.00338922	0.0249207	0.0186774	ITGA8/ITGA1/ITGB5	3
GO:0030175	CC	GO:0030175	filopodium	5/191	108/19518	0.00421061	0.0300758	0.022541	MYO6/UTRN/PODXL/APP/MYO10	5
GO:0001725	CC	GO:0001725	stress fiber	4/191	69/19518	0.00468119	0.0314285	0.0235548	LIMCH1/LIMA1/SHROOM4/TEK	4
GO:0097517	CC	GO:0097517	contractile actin filament bundle	4/191	69/19518	0.00468119	0.0314285	0.0235548	LIMCH1/LIMA1/SHROOM4/TEK	4
GO:0009925	CC	GO:0009925	basal plasma membrane	8/191	266/19518	0.00477713	0.0314285	0.0235548	CEACAM1/PDGFB/PLPP3/CHRM3/MYO1C/ACE/SHROOM4/TEK	8
GO:0030139	CC	GO:0030139	endocytic vesicle	9/191	347/19518	0.00732363	0.0469463	0.035185	SCARB1/MYO6/RAPGEF2/ITGB5/RIN2/MYO1C/SCARF1/FZD4/NOSTRIN	9
GO:0019838	MF	GO:0019838	growth factor binding	13/186	132/18369	8.70428e-10	3.30762e-07	2.60212e-07	KDR/FLT1/PDGFB/A2M/NRP1/IGFBP5/LRRC32/LIFR/THBS1/INSR/FLT4/TGFBR2/ENG	13
GO:0005096	MF	GO:0005096	GTPase activator activity	17/186	280/18369	4.0076e-09	7.61445e-07	5.99031e-07	RASGRP3/RAPGEF2/CHRM3/NRP1/SIPA1L2/RIN2/ARHGEF15/RAPGEF4/PLCB1/ARHGAP31/DLC1/ARHGEF12/ASAP2/DOCK1/ARHGAP18/ARHGAP29/PREX2	17
GO:0005112	MF	GO:0005112	Notch binding	6/186	26/18369	1.93425e-07	2.45004e-05	1.92746e-05	TCIM/JAG2/DLL4/NOTCH1/JAG1/NOTCH4	6
GO:0005178	MF	GO:0005178	integrin binding	11/186	151/18369	4.00538e-07	3.80511e-05	2.9935e-05	ADAMTS5/KDR/ITGA8/PLPP3/ITGA1/CXCL12/ESM1/ITGB5/UTRN/JAM3/THBS1	11
GO:0030695	MF	GO:0030695	GTPase regulator activity	19/186	495/18369	7.04609e-07	4.46252e-05	3.51068e-05	RASGRP3/RAPGEF2/CHRM3/NRP1/SIPA1L2/RIN2/ARHGEF15/RAPGEF4/PLCB1/ARHGAP31/RAPGEF5/DLC1/ARHGEF12/ASAP2/DOCK1/ARHGAP18/ARHGAP29/FGD5/PREX2	19
GO:0060589	MF	GO:0060589	nucleoside-triphosphatase regulator activity	19/186	495/18369	7.04609e-07	4.46252e-05	3.51068e-05	RASGRP3/RAPGEF2/CHRM3/NRP1/SIPA1L2/RIN2/ARHGEF15/RAPGEF4/PLCB1/ARHGAP31/RAPGEF5/DLC1/ARHGEF12/ASAP2/DOCK1/ARHGAP18/ARHGAP29/FGD5/PREX2	19
GO:0019955	MF	GO:0019955	cytokine binding	10/186	130/18369	8.28978e-07	4.50017e-05	3.5403e-05	A2M/NRP1/IL3RA/BMPR2/LRRC32/LIFR/THBS1/TGFBR2/ENG/FZD4	10
GO:0019199	MF	GO:0019199	transmembrane receptor protein kinase activity	8/186	77/18369	1.10182e-06	5.23366e-05	4.11734e-05	KDR/FLT1/NRP1/BMPR2/TEK/INSR/FLT4/TGFBR2	8
GO:0004714	MF	GO:0004714	transmembrane receptor protein tyrosine kinase activity	6/186	60/18369	3.16157e-05	0.00133489	0.00105016	KDR/FLT1/NRP1/TEK/INSR/FLT4	6
GO:0051020	MF	GO:0051020	GTPase binding	12/186	304/18369	6.53155e-05	0.00248199	0.00195259	RASGRP3/ROCK2/RIN2/RASIP1/MYO1C/RAPGEF4/CDC42BPB/SPTBN1/DOCK1/TNFAIP1/NCKAP1/FGD5	12
GO:0050431	MF	GO:0050431	transforming growth factor beta binding	4/186	23/18369	7.75237e-05	0.00267809	0.00210686	LRRC32/THBS1/TGFBR2/ENG	4
GO:0005085	MF	GO:0005085	guanyl-nucleotide exchange factor activity	10/186	227/18369	0.000109524	0.00346826	0.0027285	RASGRP3/RAPGEF2/RIN2/ARHGEF15/RAPGEF4/RAPGEF5/ARHGEF12/DOCK1/FGD5/PREX2	10
GO:0003779	MF	GO:0003779	actin binding	14/186	434/18369	0.000140918	0.00411913	0.00324053	CEACAM1/UACA/MYO6/UTRN/MYO1C/LIMCH1/LIMA1/ADD1/SHROOM4/SPTBN1/HIP1/MYO10/PHACTR2/KLHL5	14
GO:0005516	MF	GO:0005516	calmodulin binding	9/186	200/18369	0.000206536	0.00560597	0.00441024	CEACAM1/KCNN3/MYO6/MYO1C/PLCB1/ADD1/ACE/SPTBN1/MYO10	9
GO:0031267	MF	GO:0031267	small GTPase binding	10/186	273/18369	0.000481378	0.011082	0.00871827	RASGRP3/ROCK2/RIN2/MYO1C/RAPGEF4/CDC42BPB/DOCK1/TNFAIP1/NCKAP1/FGD5	10
GO:0004713	MF	GO:0004713	protein tyrosine kinase activity	7/186	137/18369	0.000495775	0.011082	0.00871827	KDR/FLT1/NRP1/HIPK2/TEK/INSR/FLT4	7
GO:0070851	MF	GO:0070851	growth factor receptor binding	7/186	137/18369	0.000495775	0.011082	0.00871827	PDGFB/PDGFD/ESM1/VEGFC/HIP1/APP/CDH5	7
GO:0030169	MF	GO:0030169	low-density lipoprotein particle binding	3/186	17/18369	0.000625685	0.0132089	0.0103915	SCARB1/THBS1/SCARF1	3
GO:0051015	MF	GO:0051015	actin filament binding	8/186	202/18369	0.00107161	0.0214322	0.0168608	MYO6/MYO1C/LIMA1/ADD1/SHROOM4/SPTBN1/HIP1/MYO10	8
GO:0030215	MF	GO:0030215	semaphorin receptor binding	3/186	23/18369	0.00155837	0.029609	0.0232935	SEMA3G/SEMA3F/SEMA6B	3
GO:0050840	MF	GO:0050840	extracellular matrix binding	4/186	55/18369	0.00232059	0.0419916	0.0330349	ADAMTS5/NTN4/THBS1/CLEC14A	4
GO:0005539	MF	GO:0005539	glycosaminoglycan binding	8/186	232/18369	0.00255996	0.0442175	0.0347861	ADAMTS5/SULF1/NRP1/ADAMTS1/THBS1/APP/TGFBR2/ENG	8
GO:0045499	MF	GO:0045499	chemorepellent activity	3/186	28/18369	0.00277764	0.0458914	0.0361029	SEMA3G/SEMA3F/SEMA6B	3

## Sheet: TableS4
Table S4. The mutation status of TCGA-KIRC patients
	TCGA-B0-4815-01A	TCGA-B0-5088-01A	TCGA-B0-4712-01A	TCGA-CJ-4869-01A	TCGA-CJ-6030-01A	TCGA-BP-4986-01A	TCGA-BP-4999-01A	TCGA-AK-3451-01A	TCGA-CJ-4636-01A	TCGA-CZ-4865-01A	TCGA-B8-4621-01A	TCGA-DV-5569-01A	TCGA-BP-4988-01A	TCGA-CZ-4864-01A	TCGA-AK-3427-01A	TCGA-DV-5566-01A	TCGA-A3-3382-01A	TCGA-CJ-5683-01A	TCGA-B0-5108-01A	TCGA-B4-5834-01A	TCGA-AK-3426-01A	TCGA-BP-5180-01A	TCGA-A3-3362-01A	TCGA-B0-5713-01A	TCGA-B8-4146-01B	TCGA-BP-4977-01A	TCGA-CJ-5675-01A	TCGA-A3-A8CQ-01A	TCGA-B8-4151-01A	TCGA-BP-5008-01A	TCGA-BP-5202-01A	TCGA-B4-5377-01A	TCGA-BP-4961-01A	TCGA-CJ-5677-01A	TCGA-AK-3458-01A	TCGA-T7-A92I-01A	TCGA-B0-5117-01A	TCGA-AS-3777-01A	TCGA-B8-5158-01A	TCGA-B0-5084-01A	TCGA-CZ-5457-01A	TCGA-B8-A54G-01A	TCGA-B2-5636-01A	TCGA-CW-5591-01A	TCGA-CZ-5987-01A	TCGA-AK-3453-01A	TCGA-CZ-5988-01A	TCGA-B0-5119-01A	TCGA-B0-5710-01A
EXOSC10	1	0	0	0	0	0	0	0	0	0	0	0	0	0	0	0	0	0	0	0	0	0	0	0	0	0	0	0	0	0	0	0	0	0	0	0	0	0	0	0	0	0	0	0	0	0	0	0	0
MTFR1L	1	0	0	0	0	0	0	0	0	0	0	0	0	0	0	0	0	0	0	0	0	0	0	0	0	0	0	0	0	0	0	0	0	0	0	0	0	0	0	0	0	0	0	0	0	0	0	0	0
TMEM59	1	0	0	0	0	0	0	0	0	0	0	0	0	0	0	0	0	0	0	0	0	0	0	0	0	0	0	0	0	0	0	0	0	0	0	0	0	0	0	0	0	0	0	0	0	0	0	0	0
CCDC18	1	0	0	0	0	0	0	0	0	0	0	0	0	0	0	0	0	0	0	0	0	0	0	0	0	0	0	0	0	0	0	0	0	0	0	0	0	0	0	0	0	0	0	0	0	0	0	0	0
SLC9C2	1	0	0	0	0	0	0	0	0	0	0	0	0	0	0	0	0	0	0	0	0	0	0	0	0	0	0	0	0	0	0	0	0	0	0	0	0	0	0	0	1	0	0	0	0	0	0	0	0
RNASEL	1	0	0	0	0	0	0	0	0	0	0	0	0	0	0	0	0	0	0	0	0	0	0	0	0	0	0	0	0	0	0	0	0	0	0	0	0	0	0	0	0	0	0	0	0	0	0	0	0
CDC73	1	0	0	0	0	0	0	0	0	0	0	0	0	0	0	0	0	0	0	0	0	0	0	0	0	0	0	0	0	0	0	0	0	0	0	0	0	0	0	0	0	0	0	0	0	0	0	0	0
RBBP5	1	0	0	0	0	0	0	0	0	0	0	0	0	0	0	0	0	0	0	0	0	0	0	0	0	0	0	0	0	0	0	0	0	0	0	0	0	0	0	0	0	0	0	0	0	0	0	1	0
C4BPA	1	0	0	0	0	0	0	0	0	0	0	0	0	0	0	0	0	0	0	0	0	0	0	0	0	0	0	0	0	0	0	0	0	0	0	0	0	0	0	0	0	0	0	0	0	0	0	0	0
PAX8	1	0	0	0	0	0	0	0	0	0	0	0	0	0	0	0	0	0	0	0	0	0	0	0	0	0	0	0	0	0	0	0	0	0	0	0	0	0	0	0	0	0	0	0	0	0	0	0	0
POTEF	1	0	0	0	0	0	0	0	0	0	0	0	0	0	0	0	0	0	0	0	0	0	0	0	0	0	0	0	0	0	0	0	0	0	0	0	0	0	0	0	0	0	0	0	0	0	0	0	0
BAZ2B	1	0	0	0	0	0	0	0	0	0	0	0	0	0	0	0	0	0	0	0	0	0	0	0	0	0	0	0	0	0	0	0	0	0	0	0	0	0	0	0	0	0	0	0	1	0	0	0	0
SLC19A3	1	0	0	0	0	0	0	0	0	0	0	0	0	0	0	0	0	0	0	0	0	0	0	0	0	0	0	0	0	0	0	0	0	0	0	0	0	0	0	0	0	0	0	0	0	0	0	0	0
FGD5	1	0	0	0	0	0	0	0	0	0	0	0	0	0	0	0	0	0	0	0	0	0	0	0	0	0	0	0	0	0	0	0	0	0	0	0	0	0	0	0	0	0	0	0	0	0	1	0	0
PBRM1	1	0	1	0	1	0	0	0	0	0	0	0	1	0	0	1	1	1	0	0	0	1	1	1	0	0	1	0	1	0	0	1	0	0	1	0	0	0	1	0	0	0	0	0	1	0	0	0	1
LGI2	1	0	0	0	0	0	0	0	0	0	0	0	0	0	0	0	0	0	0	0	0	0	0	0	0	0	0	0	0	0	0	0	0	0	0	0	0	0	0	0	0	0	0	0	0	0	0	0	0
MED10	1	0	0	0	0	0	0	0	0	0	0	0	0	0	0	0	0	0	0	0	0	0	0	0	0	0	0	0	0	0	0	0	0	0	0	0	0	0	0	0	0	0	0	0	0	0	0	0	0
IQGAP2	1	0	0	0	0	0	0	0	0	0	0	0	0	0	0	0	0	0	0	0	0	0	0	0	0	0	0	0	0	0	0	0	0	0	0	0	0	0	0	0	0	0	0	0	0	0	0	0	0
CMYA5	1	0	0	0	0	0	0	0	0	0	0	0	0	0	0	0	0	0	0	0	0	0	0	0	0	0	0	0	0	0	0	0	0	0	0	0	0	0	0	0	0	0	0	0	0	0	0	0	0
GABRA1	1	0	0	0	0	0	0	0	0	0	0	0	0	0	0	0	0	0	0	0	0	0	0	0	0	0	0	0	0	0	0	0	0	0	0	0	0	0	0	0	0	0	0	0	0	0	0	0	0
GTPBP2	1	0	0	0	0	0	0	0	0	0	0	0	0	0	0	0	0	0	0	0	0	0	0	0	0	0	0	0	0	0	0	0	0	0	0	0	0	0	0	0	0	0	0	0	0	0	0	0	0
PHF3	1	0	0	0	0	0	0	0	0	0	0	0	0	0	0	0	0	0	0	0	0	0	0	0	0	0	0	0	0	0	0	0	0	0	0	0	0	0	0	0	0	0	0	0	0	0	0	0	0
FIG4	1	0	0	0	0	0	0	0	0	0	0	0	0	0	0	0	0	0	0	0	0	0	0	0	0	0	0	0	0	0	0	0	0	0	0	0	0	0	0	0	0	0	0	0	0	0	0	0	0
ROS1	1	0	0	1	0	0	0	0	0	0	0	0	0	0	0	0	0	0	0	0	0	0	0	0	0	0	0	0	0	0	0	0	0	0	0	0	0	0	0	0	0	0	0	0	0	0	0	0	0
TAAR2	1	0	0	0	0	0	0	0	0	0	0	0	0	0	0	0	0	0	0	0	0	0	0	0	0	0	0	0	0	0	0	0	0	0	0	0	0	0	0	0	0	0	0	0	0	0	0	0	0
MAP3K5	1	0	0	0	0	0	0	0	0	0	0	0	0	0	0	0	0	0	0	0	0	0	0	0	0	0	0	0	0	0	0	0	0	0	0	0	0	0	0	0	0	0	0	0	0	0	0	0	0
GTF2IRD1	1	0	0	0	0	0	0	0	0	0	0	0	0	0	0	0	0	0	0	0	0	0	0	0	0	0	0	0	0	0	0	0	0	0	0	0	0	0	0	0	0	0	0	0	0	0	0	0	0
RHBDD2	1	0	0	0	0	0	0	0	0	0	0	0	0	0	0	0	0	0	0	0	0	0	0	0	0	0	0	0	0	0	0	0	0	0	0	0	0	0	0	0	0	0	0	0	0	0	0	0	0
ATAD2	1	0	0	0	0	0	0	0	0	0	0	0	0	0	0	0	0	0	0	0	0	0	0	0	0	0	0	0	0	0	0	0	0	0	0	0	0	0	0	0	0	0	0	0	0	0	0	0	0
NDRG1	1	0	0	0	0	0	0	0	0	0	0	0	0	0	0	0	0	0	0	0	0	0	0	0	0	0	0	0	0	0	0	0	0	0	0	0	0	0	0	0	0	0	0	0	0	0	0	0	0
WAC	1	0	0	0	0	0	0	0	0	0	0	0	0	0	0	0	0	0	0	0	0	0	0	0	0	0	0	0	0	0	0	0	0	0	0	0	0	0	0	0	0	0	0	0	0	0	0	0	0
ARMH3	1	0	0	0	0	0	0	0	0	0	0	0	0	0	0	0	0	0	0	0	0	0	0	0	0	0	0	0	0	0	0	0	0	0	0	0	0	0	0	0	0	0	0	0	0	0	0	0	0
CD3E	1	0	0	0	0	0	0	0	0	0	0	0	0	0	0	0	0	0	0	0	0	0	0	0	0	0	0	0	0	0	0	0	0	0	0	0	0	0	0	0	0	0	0	0	0	0	0	0	0
TMEM117	1	0	0	0	0	0	0	0	0	0	0	0	0	0	0	0	0	0	0	0	0	0	0	0	0	0	0	0	0	0	0	0	0	0	0	0	0	0	0	0	0	0	0	0	0	0	0	0	0
SCAF11	1	0	0	0	0	0	0	0	0	0	0	0	0	0	0	0	0	0	0	0	0	0	0	0	0	0	0	0	0	0	0	0	0	0	0	0	0	0	0	0	0	0	0	0	0	0	0	0	0
KRT79	1	0	0	0	0	0	0	0	0	0	0	0	0	0	0	0	0	0	0	0	0	0	0	0	0	0	0	0	0	0	0	0	0	0	0	0	0	0	0	0	0	0	0	0	0	0	0	0	0
ZNF740	1	0	0	0	0	0	0	0	0	0	0	0	0	0	0	0	0	0	0	0	0	0	0	0	0	0	0	0	0	0	0	0	0	0	0	0	0	0	0	0	0	0	0	0	0	0	0	0	0
PSMB11	1	0	0	0	0	0	0	0	0	0	0	0	0	0	0	0	0	0	0	0	0	0	0	0	0	0	0	0	0	0	0	0	0	0	0	0	0	0	0	0	0	0	0	0	0	0	0	0	0
MAP4K5	1	0	0	0	0	0	0	0	0	0	0	0	0	0	0	0	0	0	0	0	0	0	0	0	0	0	0	0	0	0	0	0	0	0	0	0	0	0	0	0	0	0	0	0	0	0	0	0	0
SPRED1	1	0	0	0	0	0	0	0	0	0	0	0	0	0	0	0	0	0	0	0	0	0	0	0	0	0	0	0	0	0	0	0	0	0	0	0	0	0	0	0	0	0	0	0	0	0	0	0	0
AAGAB	1	0	0	0	0	0	0	0	0	1	0	0	0	0	0	0	0	0	0	0	0	0	0	0	0	0	0	0	0	0	0	0	0	0	0	0	0	0	0	0	0	0	0	0	0	0	0	0	0
PGPEP1L	1	0	0	0	0	0	0	0	0	0	0	0	0	0	0	0	0	0	0	0	0	0	0	0	0	0	0	0	0	0	0	0	0	0	0	0	0	0	0	0	0	0	0	0	0	0	0	0	0
ZNF629	1	0	0	0	0	0	0	0	0	0	0	0	0	0	0	0	0	0	0	0	0	0	0	0	0	0	0	0	0	0	0	0	0	0	0	0	0	0	0	0	0	0	0	0	0	0	0	0	0
PABPN1L	1	0	0	0	0	0	0	0	0	0	0	0	0	0	0	0	0	0	0	0	0	0	0	0	0	0	0	0	0	0	0	0	0	0	0	0	0	0	0	0	0	0	0	0	0	0	0	0	0
FBXO39	1	0	0	0	0	0	0	0	0	0	0	0	0	0	0	0	0	0	0	0	0	0	0	0	0	0	0	0	0	0	0	0	0	0	0	0	0	0	0	0	0	0	0	0	0	0	0	0	0
ACACA	1	0	0	0	0	0	0	0	0	0	0	0	0	0	0	0	0	0	0	0	0	0	0	0	0	0	0	0	0	0	1	0	0	0	0	0	0	0	0	0	0	0	0	0	0	0	0	0	0
SRSF1	1	0	0	0	0	0	0	0	0	0	0	0	0	0	0	0	0	0	0	0	0	0	0	0	0	0	0	0	0	0	0	0	0	0	0	0	0	0	0	0	0	0	0	0	0	0	0	0	0
ATP8B3	1	0	0	0	0	0	0	0	0	0	0	0	0	0	0	0	0	0	0	0	0	0	0	0	0	0	0	0	0	0	0	0	0	0	0	0	0	0	0	0	0	1	0	0	0	0	0	0	0
ZNF846	1	0	0	0	0	0	0	0	0	0	0	0	0	0	0	0	0	0	0	0	0	0	0	0	0	0	0	0	0	0	0	0	0	0	0	0	0	0	0	0	0	0	0	0	0	0	0	0	0
KEAP1	1	0	0	0	0	0	0	0	0	0	0	0	0	0	0	0	0	0	0	0	0	0	0	0	0	0	0	0	0	0	0	0	0	0	0	0	0	0	0	0	0	0	0	0	0	0	0	0	0
PRKACA	1	0	0	0	0	0	0	0	0	0	0	0	0	0	0	0	0	0	0	0	0	0	0	0	0	0	0	0	0	0	0	0	0	0	0	0	0	0	0	0	0	0	0	0	0	0	0	0	0
CHD6	1	0	0	0	0	0	0	0	0	1	0	0	0	0	0	0	0	0	0	0	0	0	0	0	0	0	0	0	0	0	0	0	0	0	0	0	0	0	0	0	0	0	0	0	0	0	0	0	0
TPTE	1	0	0	0	0	0	0	0	0	0	0	0	0	0	0	0	0	0	0	0	0	0	0	0	0	0	0	0	0	0	0	0	0	0	0	0	0	0	0	0	0	0	0	0	0	0	0	0	0
SCARF2	1	0	0	0	0	0	0	0	0	0	0	0	0	0	0	0	0	0	0	0	0	0	0	0	0	0	0	0	0	0	0	0	0	0	0	0	0	0	0	0	0	0	0	0	0	0	0	0	0
TCF20	1	0	0	0	0	0	0	0	0	0	0	0	0	0	0	0	0	0	0	0	0	0	0	0	0	0	0	0	0	0	0	0	0	0	0	0	0	0	0	0	0	0	0	0	0	0	0	0	0
MYOM3	0	1	0	0	0	0	0	0	0	0	0	0	0	0	0	0	0	0	0	0	0	0	0	0	0	0	0	0	0	0	0	0	0	0	0	0	0	0	0	0	0	0	0	0	0	0	0	0	0
AKNAD1	0	1	0	0	0	0	0	0	0	0	0	0	0	0	0	0	0	0	0	0	0	0	0	0	0	0	0	0	0	0	0	0	0	0	0	0	0	0	0	0	0	1	0	0	0	0	0	0	0
RNF115	0	1	0	0	0	0	0	0	0	0	0	0	0	0	0	0	0	0	0	0	0	0	0	0	0	0	0	0	0	0	0	0	0	0	0	0	0	0	0	0	0	0	0	0	0	0	0	0	0
PSMB4	0	1	0	0	0	0	0	0	0	0	0	0	0	0	0	0	0	0	0	0	0	0	0	0	0	0	0	0	0	0	0	0	0	0	0	0	0	0	0	0	0	0	0	0	0	0	0	0	0
EEF1AKNMT	0	1	0	0	0	0	0	0	0	0	0	0	0	0	0	0	0	0	0	0	0	0	0	0	0	0	0	0	0	0	0	0	0	0	0	0	0	0	0	0	0	0	0	0	0	0	0	0	0
LYST	0	1	0	0	0	0	0	0	0	0	0	0	0	0	0	0	0	0	0	0	0	0	0	0	0	0	0	0	0	0	0	0	0	0	0	0	0	0	0	0	0	0	0	0	0	0	0	0	0
KIAA1841	0	1	0	0	0	0	0	0	0	0	0	0	0	0	0	0	0	0	0	0	0	0	0	0	0	0	0	0	0	0	0	0	0	0	0	0	0	0	0	0	0	0	0	0	0	0	0	0	0
NAGK	0	1	0	0	0	0	0	0	0	0	0	0	0	0	0	0	0	0	0	0	0	0	0	0	0	0	0	0	0	0	0	0	0	0	0	0	0	0	0	0	0	0	0	0	0	0	0	0	0
VIL1	0	1	0	0	0	0	0	0	0	0	0	0	0	0	0	0	0	0	0	0	0	0	0	0	0	0	0	0	0	0	0	0	0	0	0	0	0	0	0	0	0	0	0	0	0	0	0	0	0
CHL1	0	1	0	0	0	0	0	0	0	0	0	0	0	0	0	0	0	0	0	0	0	0	0	0	0	0	0	0	0	0	0	0	0	0	0	0	0	0	0	0	0	0	0	0	0	0	0	0	0
VHL	0	1	1	0	1	1	1	0	1	0	0	0	1	0	0	0	1	0	1	0	0	1	1	1	0	1	0	0	0	0	0	0	0	1	1	0	0	0	0	0	0	0	0	1	1	0	0	0	0
BAP1	0	1	0	1	0	0	0	1	1	0	0	0	0	1	0	0	0	0	0	0	0	0	0	0	0	0	0	0	1	0	0	0	0	0	0	0	0	0	0	0	0	1	0	0	0	0	0	0	0
ATXN7	0	1	0	0	0	0	0	0	0	0	0	0	0	0	0	0	0	0	0	0	0	0	0	0	0	0	0	0	0	0	0	0	0	0	0	0	0	0	0	0	0	0	0	0	0	0	0	0	0
EEFSEC	0	1	0	0	0	0	0	0	0	0	0	0	0	0	0	0	0	0	0	0	0	0	0	0	0	0	0	0	0	0	0	0	0	0	0	0	0	0	0	0	0	0	0	0	0	0	0	0	0
SLITRK3	0	1	0	0	0	0	0	0	0	0	0	0	0	0	0	0	0	0	0	0	0	0	0	0	0	0	0	0	0	0	0	0	0	0	0	0	0	0	0	0	0	0	0	0	0	0	0	0	0
IGF2BP2	0	1	0	0	0	0	0	0	0	0	0	0	0	0	0	0	0	0	0	0	0	0	0	0	0	0	0	0	0	0	0	0	0	0	0	0	0	0	0	0	0	0	0	0	0	0	0	0	0
TMEM63B	0	1	0	0	0	0	0	0	0	0	0	0	0	0	0	0	0	0	0	0	0	0	0	0	0	0	0	0	0	0	0	0	0	0	0	0	0	0	0	0	0	0	0	0	0	0	0	0	0
CRISP3	0	1	0	0	0	0	0	0	0	0	0	0	0	0	0	0	0	0	0	0	0	0	0	0	0	0	0	0	0	0	0	0	0	0	0	0	0	0	0	0	0	0	0	0	0	0	0	0	0
MLIP	0	1	0	0	0	0	0	0	0	0	0	0	0	0	0	0	0	0	0	0	0	0	0	0	0	0	0	0	0	0	0	0	0	0	0	0	0	0	0	0	0	0	0	0	0	0	0	0	0
GFRAL	0	1	0	0	0	0	0	0	0	0	0	0	0	0	0	0	0	0	0	0	0	0	0	0	0	0	0	0	0	0	0	0	0	0	0	0	0	0	0	0	0	0	0	0	0	0	0	0	0
SLC22A16	0	1	0	0	0	0	0	0	0	0	0	0	0	0	0	0	0	0	0	0	0	0	0	0	0	0	0	0	0	0	0	0	0	0	0	0	0	0	0	0	0	0	0	0	0	0	0	0	0
REV3L	0	1	0	1	0	0	0	0	0	0	0	0	0	0	0	0	0	0	0	0	0	0	0	0	0	0	0	0	0	0	0	0	0	0	0	0	0	0	0	0	0	0	0	0	0	0	0	0	0
STAG3	0	1	0	0	0	0	0	0	0	0	0	0	0	0	0	0	0	0	0	0	0	0	0	0	0	0	0	0	0	0	0	0	0	0	0	0	0	0	0	0	0	0	0	0	0	0	0	0	0
FLNC	0	1	0	0	0	0	0	0	0	0	0	0	0	0	0	1	0	0	0	0	0	0	0	0	0	0	0	0	0	0	0	0	0	0	0	0	0	0	0	0	0	0	0	0	0	0	0	0	0
PRKAG2	0	1	0	0	0	0	0	0	0	0	0	0	0	0	0	0	0	0	0	0	0	0	0	0	0	0	0	0	0	0	0	0	0	0	0	0	0	0	0	0	0	0	1	0	0	0	0	0	0
SLC52A2	0	1	0	0	0	0	0	0	0	0	0	0	0	0	0	0	0	0	0	0	0	0	0	0	0	0	0	0	0	0	0	0	0	0	0	0	0	0	0	0	0	0	0	0	0	0	0	0	0
KCNV2	0	1	0	0	0	0	0	0	0	0	0	0	0	0	0	0	0	0	0	0	0	0	0	0	0	0	0	0	0	0	0	0	0	0	0	0	0	0	0	0	0	0	0	0	0	0	0	0	0
MEGF9	0	1	0	0	0	0	0	0	0	0	0	0	0	0	0	0	0	0	0	0	0	0	0	0	0	0	0	0	0	0	0	0	0	0	0	0	0	0	0	0	0	0	0	0	0	0	0	0	0
SPOUT1	0	1	0	0	0	0	0	0	0	0	0	0	0	0	0	0	0	0	0	0	0	0	0	0	0	0	0	0	0	0	0	0	0	0	0	0	0	0	0	0	0	0	0	0	0	0	0	0	0
YME1L1	0	1	0	0	0	0	0	0	0	0	0	0	0	0	0	0	0	0	0	0	0	0	0	0	0	0	0	0	0	0	0	0	0	0	0	0	0	0	0	0	0	0	0	0	0	0	0	0	0
PAPSS2	0	1	0	0	0	0	0	0	0	0	0	0	0	0	0	0	0	0	0	0	0	0	0	0	0	0	0	0	0	0	0	0	0	0	0	0	0	0	0	0	0	0	0	0	0	0	0	0	0
TM9SF3	0	1	0	0	0	0	0	0	0	0	0	0	0	0	0	0	0	0	0	0	0	0	0	0	0	0	0	0	0	0	0	0	0	0	0	0	0	0	0	0	0	0	0	0	0	0	0	0	0
NSMCE4A	0	1	0	0	0	0	0	0	0	0	0	0	0	0	0	0	0	0	0	0	0	0	0	0	0	0	0	0	0	0	0	0	0	0	0	0	0	0	0	0	0	0	0	0	0	0	0	0	0
F2	0	1	0	0	0	0	0	0	0	0	0	0	0	0	0	0	0	0	0	0	0	0	0	0	0	0	0	0	0	0	0	0	0	0	0	0	0	0	0	0	0	0	0	0	0	0	0	0	0
EXPH5	0	1	0	0	0	0	0	0	0	0	0	0	0	0	0	0	0	0	0	0	0	0	0	0	0	0	0	0	0	0	0	0	0	0	0	0	0	0	0	0	0	0	0	0	0	0	0	0	0
TBC1D15	0	1	0	0	0	0	0	0	0	0	0	0	0	0	0	0	0	0	0	0	0	0	0	0	0	0	0	0	0	0	0	0	0	0	0	0	0	0	0	0	0	0	0	0	0	0	0	0	0
NAV3	0	1	0	0	0	0	0	0	0	0	0	0	0	0	0	0	0	0	0	0	0	0	0	0	0	0	0	0	0	0	0	0	0	0	0	0	0	0	0	0	0	0	0	0	0	0	0	0	0
NOS1	0	1	0	0	0	0	0	0	0	0	0	0	0	0	0	0	0	0	0	0	0	0	0	0	0	0	0	0	0	0	0	0	0	0	0	0	0	0	0	0	0	0	0	1	0	0	0	1	0
VPS37B	0	1	0	0	0	0	0	0	0	0	0	0	0	0	0	0	0	0	0	0	0	0	0	0	0	0	0	0	0	0	0	0	0	0	0	0	0	0	0	0	0	0	0	0	0	0	0	0	0
VWA8	0	1	0	0	0	0	0	1	0	0	0	0	0	0	0	0	0	0	0	0	0	1	0	0	0	0	0	0	0	0	0	0	0	0	0	0	0	0	0	0	0	0	0	0	0	0	0	0	0
CCNB2	0	1	0	0	0	0	0	0	0	0	0	0	0	0	0	0	0	0	0	0	0	0	0	0	0	0	0	0	0	0	0	0	0	0	0	0	0	0	0	0	0	0	0	0	0	0	0	0	0
SIN3A	0	1	0	0	0	0	0	0	0	0	0	0	0	0	0	0	0	0	0	0	0	0	0	0	0	0	0	0	0	0	0	0	0	0	0	0	0	0	0	0	0	0	0	0	0	0	0	0	0
CNTNAP1	0	1	0	0	0	0	0	0	0	0	0	0	0	0	0	0	0	0	0	0	0	0	0	0	0	0	0	0	0	0	0	0	0	0	0	0	0	0	0	0	0	0	0	0	0	0	0	0	0
COL1A1	0	1	0	0	0	0	0	0	0	0	0	0	0	0	0	0	0	0	0	0	0	0	0	0	0	0	0	0	0	0	0	0	0	0	0	0	0	0	0	0	0	0	0	0	0	0	0	0	0
MAPK4	0	1	0	0	0	0	0	0	0	0	0	0	0	0	0	0	0	0	0	0	0	0	0	0	0	0	0	0	0	0	0	0	0	0	0	0	0	0	0	0	0	0	0	0	0	0	0	0	0
ATP1A3	0	1	0	0	0	0	0	0	0	0	0	0	0	0	0	0	0	0	0	0	0	0	0	0	0	0	0	0	0	0	0	0	0	0	0	0	0	0	0	0	0	0	0	0	0	0	0	0	0
KLK13	0	1	0	0	0	0	0	0	0	0	0	0	0	0	0	0	0	0	0	0	0	0	0	0	0	0	0	0	0	0	0	0	0	0	0	0	0	0	0	0	0	0	0	0	0	0	0	0	0
PANK2	0	1	0	0	1	0	0	0	0	0	0	0	0	0	0	0	0	0	0	0	0	0	0	0	0	0	0	0	0	0	0	0	0	0	0	0	0	0	0	0	0	0	0	0	0	0	0	0	0
FAM83D	0	1	0	0	0	0	0	0	0	0	0	0	0	0	0	0	0	0	0	0	0	0	0	0	0	0	0	0	0	0	0	0	0	0	0	0	0	0	0	0	0	0	0	0	0	0	0	0	0
NRIP1	0	1	0	0	0	0	0	0	0	0	0	0	0	0	0	0	0	0	0	0	0	0	0	0	0	0	0	0	0	0	0	0	0	0	0	0	0	0	0	0	0	0	0	0	0	0	0	0	0
SCML1	0	1	0	0	0	0	0	0	0	0	0	0	0	0	0	0	0	0	0	0	0	0	0	0	0	0	0	0	0	0	0	0	0	0	0	0	0	0	0	0	0	0	0	0	0	0	0	0	0
ZNF711	0	1	0	0	0	0	0	0	0	0	0	0	0	0	0	0	0	0	0	0	0	0	0	0	0	0	0	0	0	0	0	0	0	0	0	0	0	0	0	0	0	0	0	0	0	0	0	0	0
COL24A1	0	0	1	0	0	0	0	0	0	1	0	0	0	0	0	0	0	0	0	0	0	0	0	0	0	0	0	0	0	0	0	0	0	0	0	0	0	0	0	0	0	0	0	0	0	0	0	0	0
DENND2C	0	0	1	0	0	0	0	0	0	0	0	0	0	0	0	0	0	0	0	0	0	0	0	0	0	0	0	0	0	0	0	0	0	0	0	0	0	0	0	0	0	0	0	0	0	0	0	0	0
TADA1	0	0	1	0	0	0	0	0	0	0	0	0	0	0	0	0	0	0	0	0	0	0	0	0	0	0	0	0	0	0	0	0	0	0	0	0	0	0	0	0	0	0	0	0	0	0	0	0	0
DHX57	0	0	1	0	0	0	0	0	0	0	0	0	0	0	0	0	0	0	0	0	0	0	0	0	0	0	0	0	0	0	0	0	0	0	0	0	0	0	0	0	0	0	0	0	0	0	0	0	0
B3GNT2	0	0	1	0	0	0	0	0	0	0	0	0	0	0	0	0	0	0	0	0	0	0	0	0	0	0	0	0	0	0	0	0	0	0	0	0	0	0	0	0	0	0	0	0	0	0	0	0	0
SCN2A	0	0	1	0	0	0	0	0	0	0	0	0	0	0	0	0	0	0	0	0	0	0	0	0	0	0	0	0	0	0	0	0	0	0	0	0	0	0	0	0	0	0	0	0	0	0	0	0	0
HECW2	0	0	1	0	0	0	0	0	0	0	0	0	0	0	0	0	0	0	0	0	0	0	0	0	0	0	0	0	0	0	0	0	0	0	0	0	0	0	0	0	0	0	0	0	0	0	0	0	0
CFLAR	0	0	1	0	0	0	0	0	0	0	0	0	0	0	0	0	0	0	0	0	0	0	0	0	0	0	0	0	0	0	0	0	0	0	0	0	0	0	0	0	0	0	0	0	0	0	0	0	0
NCL	0	0	1	0	0	0	0	0	0	0	0	0	0	0	0	0	0	0	0	0	0	0	0	0	0	0	0	0	1	0	0	0	0	0	0	0	0	0	0	0	0	0	0	0	0	0	0	0	0
ARGFX	0	0	1	0	0	0	0	0	0	0	0	0	0	0	0	0	0	0	0	0	0	0	0	0	0	0	0	0	0	0	0	0	0	0	0	0	0	0	0	0	0	0	0	0	0	0	0	0	0
MYLK	0	0	1	0	0	0	0	0	0	0	0	0	0	0	0	0	0	0	0	0	0	0	0	0	0	0	0	0	0	0	0	0	0	0	0	0	0	0	0	0	0	0	0	0	0	0	0	0	0
COL6A6	0	0	1	0	1	0	0	0	0	0	0	0	0	0	0	0	0	0	0	0	0	0	0	0	0	0	0	0	0	0	1	0	0	0	0	0	0	0	0	0	0	0	0	0	0	0	1	1	0
ATP2C1	0	0	1	0	0	0	0	0	0	0	0	0	0	0	0	0	0	0	0	0	0	0	0	0	0	0	0	0	0	0	0	0	0	0	0	0	0	0	0	0	0	0	0	0	0	0	0	0	0
P2RY12	0	0	1	0	0	0	0	0	0	0	0	0	0	0	0	0	0	0	0	0	0	0	0	0	0	0	0	0	0	0	0	0	0	0	0	0	0	0	0	0	0	0	0	0	0	0	0	0	0
TPRG1	0	0	1	0	0	0	0	0	0	0	0	0	0	0	0	0	0	0	0	0	0	0	0	0	0	0	0	0	0	0	0	0	0	0	0	0	0	0	0	0	0	0	0	0	0	0	0	0	0
HTRA3	0	0	1	0	0	0	0	0	0	0	0	0	0	0	0	0	0	0	0	0	0	0	0	0	0	0	0	0	0	0	0	0	0	0	0	0	0	0	0	0	0	0	0	0	0	0	0	0	0
FRYL	0	0	1	0	0	0	0	0	0	0	0	0	0	0	0	0	0	0	0	0	0	0	0	0	0	0	0	0	0	0	0	0	0	0	0	0	0	0	0	0	0	0	0	0	0	0	0	0	0
KDR	0	0	1	0	0	0	0	0	0	0	0	0	0	0	0	0	0	0	0	0	0	0	0	0	0	0	0	0	0	0	0	0	0	0	0	0	0	0	0	0	1	0	0	0	0	0	0	0	0
REST	0	0	1	0	0	0	0	0	0	0	0	0	0	0	0	0	0	0	0	0	0	0	0	0	0	0	0	0	0	0	0	0	0	0	0	0	0	0	0	0	0	0	0	0	0	0	0	0	0
RAP1GDS1	0	0	1	0	0	0	0	0	0	0	0	0	0	0	0	0	0	0	0	0	0	0	0	0	0	0	0	0	0	0	0	0	0	0	0	0	0	0	0	0	0	0	0	0	0	0	0	0	0
UTP15	0	0	1	0	0	0	0	0	0	0	0	0	0	0	0	0	0	0	0	0	0	0	0	0	0	0	0	0	0	0	0	0	0	0	0	0	0	0	0	0	0	0	0	0	0	0	0	0	0
CHSY3	0	0	1	0	0	0	0	0	0	0	0	0	0	0	0	0	0	0	0	0	0	0	0	0	0	0	0	0	0	0	0	0	0	0	0	0	0	0	0	0	0	0	0	0	0	0	0	0	0
FNIP1	0	0	1	0	0	0	0	0	0	0	0	0	0	0	0	0	0	0	0	0	0	0	0	0	0	0	0	0	0	0	0	0	0	0	0	0	0	0	0	0	0	0	0	0	0	0	0	0	0
CSF1R	0	0	1	0	0	0	0	0	0	0	0	0	0	0	0	0	0	0	0	0	0	0	0	0	0	0	0	0	0	0	0	0	0	0	0	0	0	0	0	0	0	0	0	0	0	0	0	0	0
OSBPL3	0	0	1	0	0	0	0	0	0	0	0	0	0	0	0	0	0	0	0	0	0	0	0	0	0	0	0	0	0	0	0	0	0	0	0	0	0	0	0	0	0	0	0	0	0	0	0	0	0
MRPL32	0	0	1	0	0	0	0	0	0	0	0	0	0	0	0	0	0	0	0	0	0	0	0	0	0	0	0	0	0	0	0	0	0	0	0	0	0	0	0	0	0	0	0	0	0	0	0	0	0
PRKAR2B	0	0	1	0	0	0	0	0	0	0	0	0	0	0	0	0	0	0	0	0	0	0	0	0	0	0	0	0	0	0	0	0	0	0	0	0	0	0	0	0	0	0	0	0	0	0	0	0	0
LRRC4	0	0	1	0	0	0	0	0	0	0	0	0	0	0	0	0	0	0	0	0	0	0	0	0	0	0	0	0	0	0	0	0	0	0	0	0	0	0	0	0	0	0	0	0	0	0	0	0	0
TNPO3	0	0	1	0	0	0	0	0	0	0	0	0	0	0	0	0	0	0	0	0	0	0	0	0	0	0	0	0	0	0	0	0	0	0	0	0	0	0	0	0	0	0	0	0	0	0	0	0	0
CSMD1	0	0	1	0	0	0	0	0	0	0	0	0	0	0	0	0	0	0	0	0	0	0	0	0	0	0	0	0	0	0	0	0	0	0	0	0	0	0	0	0	0	0	0	0	0	0	0	0	0
TAF2	0	0	1	0	0	0	0	0	0	0	0	0	0	0	0	0	0	0	0	0	0	0	0	0	0	0	0	0	0	0	0	0	0	0	0	0	0	0	0	0	0	0	0	0	0	0	0	0	0
COL22A1	0	0	1	0	0	0	0	0	0	0	0	0	0	0	0	0	0	0	0	0	0	0	0	0	0	0	0	0	0	0	0	1	0	0	0	0	0	0	0	0	0	0	0	0	0	0	0	0	0
IL33	0	0	1	0	0	0	0	0	0	0	0	0	0	1	0	0	0	0	0	0	0	0	0	0	0	0	0	0	0	0	0	0	0	0	0	0	0	0	0	0	0	0	0	0	0	0	0	0	0
CCDC171	0	0	1	0	0	0	0	0	0	0	1	0	0	0	0	0	0	0	0	0	0	0	0	0	0	0	0	0	0	0	0	0	0	0	0	0	0	0	0	0	0	0	0	0	0	0	0	0	0
SMC2	0	0	1	0	0	0	0	0	0	0	0	0	0	0	0	0	0	0	0	0	0	0	0	0	0	0	0	0	0	0	0	0	0	0	0	0	0	0	0	0	0	0	0	0	0	0	0	0	0
CDK5RAP2	0	0	1	0	0	0	0	0	0	0	0	0	0	0	0	0	0	0	0	0	0	0	0	0	0	0	0	0	0	0	0	0	0	0	0	0	0	0	0	0	0	0	0	0	0	0	0	0	0
NRBF2	0	0	1	0	0	0	0	0	0	0	0	0	0	0	0	0	0	0	0	0	0	0	0	0	0	0	0	0	0	0	0	0	0	0	0	0	0	0	0	0	0	0	0	0	0	0	0	0	0
ATRNL1	0	0	1	0	0	0	0	0	0	0	0	0	0	0	0	0	0	0	0	0	0	0	0	0	0	0	0	0	0	0	0	0	0	0	0	0	0	0	0	0	0	0	0	0	0	0	0	0	0
SLC17A6	0	0	1	0	0	0	0	0	0	0	0	0	0	0	0	0	0	0	0	0	0	0	0	0	0	0	0	0	0	0	0	0	0	0	0	0	0	0	0	0	0	0	0	0	0	0	0	0	0
GLYAT	0	0	1	0	0	0	0	0	0	0	0	0	0	0	0	0	0	0	0	0	0	0	0	0	0	0	0	0	0	0	0	0	0	0	0	0	0	0	0	0	0	0	0	0	0	0	0	0	0
MS4A6E	0	0	1	0	0	0	0	0	0	0	0	0	0	0	0	0	0	0	0	0	0	0	0	0	0	0	0	0	0	0	0	0	0	0	0	0	0	0	0	0	0	0	0	0	0	0	0	0	0
MTA2	0	0	1	0	0	0	0	0	0	0	0	0	0	0	0	0	0	0	0	0	0	0	0	0	0	0	0	0	0	0	0	0	0	0	0	0	0	0	0	0	0	0	0	0	0	0	0	0	0
SLC6A12	0	0	1	0	0	0	0	0	0	0	0	0	0	0	0	0	0	0	0	0	0	0	0	0	0	0	0	0	0	0	0	0	0	0	0	0	0	0	0	0	0	0	0	0	0	0	0	0	0
SOX5	0	0	1	0	0	0	0	0	0	0	0	0	0	0	0	0	0	0	0	0	0	0	0	0	0	0	0	0	0	0	0	0	0	0	0	0	0	0	0	0	0	0	0	0	0	0	0	0	0
UHRF1BP1L	0	0	1	0	0	0	0	0	0	0	0	0	0	0	0	0	0	0	0	0	0	0	0	0	0	0	0	0	0	0	0	0	0	0	0	0	0	0	0	0	0	0	0	0	0	0	0	0	0
SLC17A8	0	0	1	0	0	0	0	0	0	0	0	0	0	0	0	0	0	0	0	0	0	0	0	0	0	0	0	0	0	0	0	0	0	0	0	0	0	0	0	0	0	0	0	0	0	0	0	0	0
NT5DC3	0	0	1	0	0	0	0	0	0	0	0	0	0	0	0	0	0	0	0	0	0	0	0	0	0	0	0	0	0	0	0	0	0	0	0	0	0	0	0	0	0	0	0	0	0	0	0	0	0
STARD13	0	0	1	0	0	0	0	0	0	0	0	0	0	0	0	0	0	0	0	0	0	0	0	0	0	0	0	0	0	0	0	0	0	0	0	0	0	0	0	0	0	0	0	0	0	0	0	0	0
SUGT1	0	0	1	0	0	0	0	0	0	0	0	0	0	0	0	0	0	0	0	0	0	0	0	0	0	0	0	0	0	0	0	0	0	0	0	0	0	0	0	0	0	0	0	0	0	0	0	0	0
DOCK9	0	0	1	0	0	0	0	0	0	0	0	0	0	0	0	0	0	0	0	0	0	0	0	0	0	0	0	0	0	0	0	0	0	0	0	0	0	0	0	0	0	0	0	0	0	0	0	0	0
OR4N2	0	0	1	0	0	0	0	0	0	0	0	0	0	0	0	0	0	0	0	0	0	0	0	0	0	0	0	0	0	0	0	0	0	0	0	0	0	0	0	0	0	0	0	0	0	0	0	0	0
FBXO34	0	0	1	0	0	0	0	0	0	0	0	0	0	0	0	0	0	0	0	0	0	0	0	0	0	0	0	0	0	0	0	0	0	0	0	0	0	0	0	0	0	0	0	0	0	0	0	0	0
IGHV4-34	0	0	1	0	0	0	0	0	0	0	0	0	0	0	0	0	0	0	0	0	0	0	0	0	0	0	0	0	0	0	0	0	0	0	0	0	0	0	0	0	0	0	0	0	0	0	0	0	0
DLL4	0	0	1	0	0	0	0	0	0	0	0	0	0	0	0	0	0	0	0	0	0	0	0	0	0	0	0	0	0	0	0	0	0	0	0	0	0	0	0	0	0	0	0	0	0	0	0	0	0
TSPAN3	0	0	1	0	0	0	0	0	0	0	0	0	0	0	0	0	0	0	0	0	0	0	0	0	0	0	0	0	0	0	0	0	0	0	0	0	0	0	0	0	0	0	0	0	0	0	0	0	0
TSC2	0	0	1	0	0	0	0	0	0	0	0	0	0	0	0	0	0	0	0	0	0	0	0	0	0	0	0	0	0	0	0	0	0	0	0	1	0	0	0	0	0	0	0	0	0	0	0	0	0
HIRIP3	0	0	1	0	0	0	0	0	0	0	0	0	0	0	0	0	0	0	0	0	0	0	0	0	0	0	0	0	0	0	0	0	0	0	0	0	0	0	0	0	0	0	0	0	0	0	0	0	0
NLRC5	0	0	1	0	0	0	0	0	0	0	0	0	0	0	0	0	0	0	0	0	0	0	0	0	0	0	0	0	0	0	0	0	0	0	0	0	0	0	0	0	0	0	0	0	0	0	0	0	0
TRPV1	0	0	1	0	0	0	0	0	0	0	0	0	0	0	0	0	0	0	0	0	0	0	0	0	0	0	0	0	0	0	0	0	0	0	0	0	0	0	0	0	0	0	0	0	0	0	0	0	0
CHD3	0	0	1	0	0	0	0	1	0	0	0	0	0	0	0	0	0	0	0	0	0	0	0	0	0	0	0	0	0	0	0	0	0	0	0	0	0	0	0	0	0	0	0	0	0	0	0	0	0
MEIOC	0	0	1	0	0	0	0	0	0	0	0	0	0	0	0	0	0	0	0	0	0	0	0	0	0	0	0	0	0	0	0	0	0	1	0	0	0	0	0	0	0	0	0	0	0	0	0	0	0
EMILIN2	0	0	1	0	0	0	0	0	0	0	0	0	0	0	0	0	0	0	0	0	0	0	0	0	0	0	0	0	0	0	0	0	0	0	0	0	0	0	0	0	0	0	0	0	0	0	0	0	0
ADGRE3	0	0	1	0	0	0	0	0	0	0	0	0	0	0	0	0	0	0	0	0	0	0	0	0	0	0	0	0	0	0	0	0	0	0	0	0	0	0	0	0	0	0	0	0	0	0	0	0	0
ZNF208	0	0	1	0	0	0	0	0	0	0	0	0	0	0	0	0	0	0	0	0	0	0	0	0	0	0	0	0	0	0	0	0	0	0	0	0	0	0	0	0	0	0	0	0	0	0	0	0	0
GRWD1	0	0	1	0	0	0	0	0	0	0	0	0	0	0	0	0	0	0	0	0	0	0	0	0	0	0	0	0	0	0	0	0	0	0	0	0	0	0	0	0	0	0	0	0	0	0	0	0	0
LILRB4	0	0	1	0	0	0	0	0	0	0	0	0	0	0	0	0	0	0	0	0	0	0	0	0	0	0	0	0	0	0	0	0	0	0	0	0	0	0	0	0	0	0	0	0	0	0	0	0	0
C20orf194	0	0	1	0	0	0	0	0	0	0	0	0	0	0	0	0	0	0	0	0	0	0	0	0	0	0	1	0	0	0	0	0	0	0	0	0	0	0	0	0	0	0	0	0	0	0	0	0	0
RALGAPB	0	0	1	0	0	0	0	0	0	0	0	0	0	0	0	0	0	0	0	0	0	0	0	0	0	0	0	0	0	0	0	0	0	0	0	0	0	0	0	0	0	0	0	0	0	0	0	0	0
ARFGEF2	0	0	1	0	0	0	0	0	0	0	0	0	0	0	0	0	0	0	0	0	0	0	0	0	0	0	0	0	0	0	0	0	0	0	0	0	0	0	0	0	0	0	0	0	1	0	0	0	0
PI4KA	0	0	1	0	0	0	0	0	0	0	0	0	0	0	0	0	0	0	0	0	0	0	0	0	0	0	0	0	0	0	0	0	0	0	0	0	0	0	0	0	0	0	0	0	0	0	0	1	0
ZC3H12B	0	0	1	0	0	0	0	0	0	0	0	0	0	0	0	0	0	0	0	0	0	0	0	0	0	0	0	0	0	0	0	0	0	0	0	0	0	0	0	0	0	0	0	0	0	0	0	0	0
CDX4	0	0	1	0	0	0	0	0	0	0	0	0	0	0	0	0	0	0	0	0	0	0	0	0	0	0	0	0	0	0	0	0	0	0	0	0	0	0	0	0	0	0	0	0	0	0	0	0	0
RRAGC	0	0	0	1	0	0	0	0	0	0	0	0	0	0	0	0	0	0	0	0	0	0	0	0	0	0	0	0	0	0	0	0	0	0	0	0	0	0	0	0	0	0	0	0	0	0	0	0	0
UROD	0	0	0	1	0	0	0	0	0	0	0	0	0	0	0	0	0	0	0	0	0	0	0	0	0	0	0	0	0	0	0	0	0	0	0	0	0	0	0	0	0	0	0	0	0	0	0	0	0
WDR47	0	0	0	1	0	0	0	0	0	0	0	0	0	0	0	0	0	0	0	0	0	0	0	0	0	0	0	0	0	0	0	0	0	0	0	0	0	0	0	0	0	0	0	0	0	0	0	0	0
GPR89A	0	0	0	1	0	0	0	0	0	0	0	0	0	0	0	0	0	0	0	0	0	0	0	0	0	0	0	0	0	0	0	0	0	0	0	0	0	0	0	0	0	0	0	0	0	0	0	0	0
NTRK1	0	0	0	1	0	0	0	0	0	0	0	0	0	0	0	0	0	0	1	0	0	0	0	0	0	0	0	0	0	0	0	0	0	0	0	0	0	0	0	0	0	0	0	0	0	0	0	0	0
SPATA45	0	0	0	1	0	0	0	0	0	0	0	0	0	0	0	0	0	0	0	0	0	0	0	0	0	0	0	0	0	0	0	0	0	0	0	0	0	0	0	0	0	0	0	0	0	0	0	0	0
PROX1	0	0	0	1	0	0	0	0	0	0	0	0	0	0	0	0	0	0	0	0	0	0	0	0	0	0	0	0	0	0	0	0	0	0	0	0	0	0	0	0	0	0	0	0	0	0	0	0	0
IARS2	0	0	0	1	0	0	0	0	0	0	0	0	0	0	0	0	0	0	0	0	0	0	0	0	0	0	0	0	0	0	0	0	0	0	0	0	0	0	0	0	0	0	0	0	0	0	0	0	0
CLASP1	0	0	0	1	0	0	0	0	0	0	0	0	0	0	0	0	0	0	0	0	0	0	0	0	0	0	0	0	0	0	0	0	0	0	0	0	0	0	0	0	0	0	0	0	0	0	0	0	0
TTN	0	0	0	1	0	0	0	1	0	0	0	0	0	0	0	0	1	0	0	0	0	0	1	0	0	0	0	0	0	0	0	1	0	0	0	0	0	0	0	0	0	0	1	0	0	0	0	0	0
SP140	0	0	0	1	0	0	0	0	0	0	0	0	0	0	0	0	0	0	0	0	0	0	0	0	0	0	0	0	1	0	0	0	0	0	0	0	0	0	0	0	0	0	0	0	0	0	0	0	0
JAGN1	0	0	0	1	0	0	0	0	0	0	0	0	0	0	0	0	0	0	0	0	0	0	0	0	0	0	0	0	0	0	0	0	0	0	0	0	0	0	0	0	0	0	0	0	0	0	0	0	0
ZBTB11	0	0	0	1	0	0	0	0	0	0	0	0	0	0	0	0	0	0	0	0	0	0	0	0	0	0	0	0	0	0	0	0	0	0	0	0	0	0	0	0	0	0	0	0	0	0	0	0	0
KLHL24	0	0	0	1	0	0	0	0	0	0	0	0	0	0	0	0	0	0	0	0	0	0	0	0	0	0	0	0	0	1	0	0	0	0	0	0	0	0	0	0	0	0	0	0	0	0	0	0	0
CXXC4	0	0	0	1	0	0	0	0	0	0	0	0	0	0	0	0	0	0	0	0	0	0	0	0	0	0	0	0	0	0	0	0	0	0	0	0	0	0	0	0	0	0	0	0	0	0	0	0	0
FAT4	0	0	0	1	0	0	0	0	0	1	0	0	0	0	0	0	0	0	0	0	0	0	0	0	0	0	0	0	0	1	0	0	0	0	0	0	0	0	0	0	0	0	0	0	0	0	0	0	0
LRBA	0	0	0	1	0	0	0	0	0	0	0	0	0	0	0	0	0	0	0	0	0	0	0	0	0	0	0	0	0	0	0	0	0	0	0	0	0	0	0	0	0	0	0	0	0	0	0	0	0
SLC6A19	0	0	0	1	0	0	0	0	0	0	0	0	0	0	0	0	0	0	0	0	0	0	0	0	0	0	0	0	0	0	0	0	0	0	0	0	0	0	0	0	0	0	0	0	0	0	0	0	0
MARCHF11	0	0	0	1	0	0	0	0	0	0	0	0	0	0	0	0	0	0	0	0	0	0	0	0	0	0	0	0	0	0	0	0	0	0	0	0	0	0	0	0	0	0	0	0	0	0	0	0	0
HSPA4	0	0	0	1	0	0	0	0	0	0	0	0	0	0	0	0	0	0	0	0	0	0	0	0	0	0	0	0	0	0	0	0	0	0	0	0	0	0	0	0	0	0	0	1	0	0	0	0	0
HERPUD2	0	0	0	1	0	0	0	0	0	0	0	0	0	0	0	0	0	0	0	0	0	0	0	0	0	0	0	0	0	0	0	0	0	0	0	0	0	0	0	0	0	0	0	0	0	0	0	0	0
SAMD9	0	0	0	1	0	0	0	0	0	0	0	0	0	0	0	0	0	0	0	0	0	0	0	0	0	0	0	0	0	0	0	0	0	0	0	0	0	0	0	0	0	0	0	0	0	0	0	0	0
KLHDC10	0	0	0	1	0	0	0	0	0	0	0	0	0	0	0	0	0	0	0	0	0	0	0	0	0	0	0	0	0	0	0	0	0	0	0	0	0	0	0	0	0	0	0	0	0	0	0	0	0
ADGRA2	0	0	0	1	0	0	0	0	0	0	0	0	0	0	0	0	0	0	0	0	0	0	0	0	0	0	0	0	0	0	0	0	0	0	0	0	0	0	0	0	0	0	0	0	0	0	0	0	0
SULF1	0	0	0	1	0	0	0	0	0	0	0	0	0	0	0	0	0	0	0	0	0	1	0	0	0	0	0	0	0	0	0	0	0	0	0	0	0	0	0	0	0	0	0	0	0	0	0	1	0
SLC10A5	0	0	0	1	0	0	0	0	0	0	0	0	0	0	0	0	0	0	0	0	0	0	0	0	0	0	0	0	0	0	0	0	0	0	0	0	0	0	0	0	0	0	0	0	0	0	0	0	0
COL14A1	0	0	0	1	0	0	0	0	0	0	0	0	0	0	0	0	0	0	0	0	0	0	0	0	0	0	0	0	0	0	0	0	0	0	0	0	0	0	0	0	0	0	0	0	0	0	0	0	0
TBC1D2	0	0	0	1	0	0	0	0	0	0	0	0	0	0	0	0	0	0	0	0	0	0	0	0	0	0	0	0	0	0	0	0	0	0	0	0	0	0	0	0	0	0	0	0	0	0	0	0	0
TNC	0	0	0	1	0	0	0	0	0	0	0	0	0	0	0	0	0	0	0	0	0	0	0	0	0	1	0	0	0	0	0	0	0	0	0	0	0	0	0	0	0	0	0	0	0	0	0	0	0
VIM	0	0	0	1	0	0	0	0	0	0	0	0	0	0	0	0	0	0	0	0	0	0	0	0	0	0	0	0	0	0	0	0	0	0	0	0	0	0	0	0	0	0	0	0	0	0	0	0	0
ANK3	0	0	0	1	0	0	0	0	0	0	0	0	0	0	0	0	0	0	0	1	0	0	0	0	0	0	0	0	0	0	0	0	0	0	0	0	0	0	0	0	0	0	0	0	0	0	0	0	0
TDRD1	0	0	0	1	0	0	0	0	0	0	0	0	0	0	0	0	0	0	0	0	0	0	0	0	0	0	0	0	0	0	0	0	0	0	0	0	0	0	0	0	0	0	0	0	0	0	0	0	0
MUC2	0	0	0	1	0	0	0	1	0	0	0	0	0	0	0	0	0	0	0	0	0	0	0	0	0	0	0	0	0	0	0	0	0	0	0	0	0	0	0	0	0	0	0	0	0	0	0	0	0
C11orf16	0	0	0	1	0	0	0	0	0	0	0	0	0	0	0	0	0	0	0	0	0	0	0	0	0	0	0	0	0	0	0	0	0	0	0	0	0	0	0	0	0	0	0	0	0	0	0	0	0
ABCC8	0	0	0	1	0	0	0	0	0	0	0	0	0	0	0	0	0	0	0	0	0	0	0	0	0	0	0	0	0	0	0	0	0	0	0	0	0	0	0	0	0	0	0	0	0	0	0	0	0
PGR	0	0	0	1	0	0	0	0	0	0	0	0	0	0	0	0	0	0	0	0	0	0	0	0	0	0	0	0	1	0	0	0	0	0	0	0	0	0	0	0	0	0	0	0	0	0	0	0	0
BCL9L	0	0	0	1	0	0	0	0	0	0	0	0	0	0	0	0	0	0	0	0	0	0	0	0	0	0	0	0	0	0	0	0	0	0	0	0	0	0	0	0	0	0	0	0	0	0	0	0	0
CACNA1C	0	0	0	1	0	0	0	0	0	0	0	0	0	0	0	0	0	0	0	0	0	0	0	0	0	0	0	0	0	0	0	0	0	0	0	0	0	0	0	0	1	0	0	0	0	0	0	0	0
DIP2B	0	0	0	1	0	0	0	0	0	0	0	0	0	0	0	0	0	0	0	0	0	0	0	0	0	0	0	0	0	0	0	1	0	0	0	0	0	0	0	0	0	0	0	0	0	0	0	0	0
METAP2	0	0	0	1	0	0	0	0	0	0	0	0	0	0	0	0	0	0	0	0	0	0	0	0	0	0	0	0	0	0	0	0	0	0	0	0	0	0	0	0	0	0	0	0	0	0	0	0	0
FZD10	0	0	0	1	0	0	0	0	0	0	0	0	0	0	0	0	0	0	0	0	0	0	0	0	0	0	0	0	0	0	0	0	0	0	0	0	0	0	0	0	0	0	0	0	0	0	0	0	0
EP400	0	0	0	1	0	0	0	0	0	0	0	0	0	0	0	0	0	0	0	0	0	0	0	0	0	0	0	0	0	0	0	0	0	0	0	0	0	0	0	0	0	0	0	0	0	0	0	0	0
MICU2	0	0	0	1	0	0	0	0	0	0	0	0	0	0	0	0	0	0	0	0	0	0	0	0	0	0	0	0	0	0	0	0	0	0	0	0	0	0	0	0	0	0	0	0	0	0	0	0	0
RFXAP	0	0	0	1	0	0	0	0	0	0	0	0	0	0	0	0	0	0	0	0	0	0	0	0	0	0	0	0	0	0	0	0	0	0	0	0	0	0	0	0	0	0	0	0	0	0	0	0	0
MYO16	0	0	0	1	0	0	0	0	0	0	0	0	0	0	0	0	0	0	0	0	0	0	0	0	0	0	0	0	0	0	0	0	0	0	0	0	0	1	0	0	0	0	0	0	0	0	0	0	0
OCA2	0	0	0	1	0	0	0	0	0	0	0	0	0	0	0	0	0	0	0	0	0	0	0	0	0	0	0	0	0	0	0	0	0	0	0	0	0	0	0	0	0	0	0	0	0	0	0	0	0
CCPG1	0	0	0	1	0	0	0	0	0	0	0	0	0	0	0	0	0	0	0	0	0	0	0	0	0	0	0	0	0	0	0	0	0	0	0	0	0	0	0	0	0	0	0	0	0	0	0	0	0
DPEP3	0	0	0	1	0	0	0	0	0	0	0	0	0	0	0	0	0	0	0	0	0	0	0	0	0	0	0	0	0	0	0	0	0	0	0	0	0	0	0	0	0	0	0	0	0	0	0	0	0
HYDIN	0	0	0	1	0	0	0	0	0	0	0	0	0	0	0	0	0	1	0	0	0	0	0	0	0	0	0	0	0	0	0	0	0	0	0	0	0	0	0	0	0	0	0	0	0	0	0	0	0
ANKRD11	0	0	0	1	0	0	0	0	0	0	0	0	0	0	0	0	0	0	0	0	0	0	0	0	0	0	0	0	0	0	0	0	0	0	0	0	0	0	0	0	0	0	0	0	0	0	0	0	0
MAPK7	0	0	0	1	0	0	0	0	0	0	0	0	0	0	0	0	0	0	0	0	0	0	0	0	0	0	0	0	0	0	0	0	0	0	0	0	0	0	0	0	0	0	0	0	0	0	0	0	0
KRT27	0	0	0	1	0	0	0	0	0	0	0	0	0	0	0	0	0	0	0	0	0	0	0	0	0	0	0	0	0	0	0	0	0	0	0	0	0	0	0	0	0	0	0	0	0	0	0	0	0
TBX21	0	0	0	1	0	0	0	0	0	0	0	0	0	1	0	0	0	0	0	0	0	0	0	0	0	0	0	0	0	0	0	0	0	0	0	0	0	0	0	0	0	0	0	0	0	0	0	0	0
GPR142	0	0	0	1	0	0	0	0	0	0	0	0	0	0	0	0	0	0	0	0	0	0	0	0	0	0	0	0	0	0	0	0	0	0	0	0	0	0	0	0	0	0	0	0	0	0	0	0	0
VPS4B	0	0	0	1	0	0	0	0	0	0	0	0	0	0	0	0	0	0	0	0	0	0	0	0	0	0	0	0	0	0	0	0	0	0	0	0	0	0	0	0	0	0	0	0	0	0	0	0	0
MUC16	0	0	0	1	0	0	1	0	0	0	0	1	0	0	0	0	0	0	0	0	0	0	0	0	0	0	0	0	0	0	1	0	0	0	0	0	0	0	0	0	0	0	0	0	0	0	0	0	0
CCDC151	0	0	0	1	0	0	0	0	0	0	0	0	0	0	0	0	0	0	0	0	0	0	0	0	0	0	0	0	0	0	0	0	0	0	0	0	0	0	0	0	0	0	0	0	0	0	0	0	0
R3HDML	0	0	0	1	0	0	0	0	0	0	0	0	0	0	0	0	0	0	0	0	0	0	0	0	0	0	0	0	0	0	0	0	0	0	0	0	0	0	0	0	0	0	0	0	0	0	0	0	0
ADA2	0	0	0	1	0	0	0	0	0	0	0	0	0	0	0	0	0	0	0	0	0	0	0	0	0	0	0	0	0	0	0	0	0	0	0	0	0	0	0	0	0	0	0	0	0	0	0	0	0
TEX11	0	0	0	1	0	0	0	0	0	0	0	0	0	0	0	0	0	0	0	0	0	0	0	0	0	0	0	0	0	0	0	0	0	0	0	0	0	0	0	0	0	0	0	0	0	0	0	0	0
ZYG11B	0	0	0	0	1	0	0	0	0	0	0	0	0	0	0	0	0	0	0	0	0	0	0	0	0	0	0	0	0	0	0	0	0	0	0	0	0	0	0	0	0	0	0	0	0	0	0	0	0
ABCA4	0	0	0	0	1	0	0	0	0	0	0	0	0	0	0	0	0	0	0	0	0	0	0	0	0	0	0	0	0	0	0	0	0	0	0	0	0	0	0	0	0	0	0	0	0	0	0	0	0
COL11A1	0	0	0	0	1	0	0	0	0	0	0	0	0	0	0	0	0	0	0	0	0	0	0	0	0	0	0	0	0	0	0	0	0	0	0	0	0	0	0	0	0	0	0	0	0	0	0	0	0
CD53	0	0	0	0	1	0	0	0	0	0	0	0	0	0	0	0	0	0	0	0	0	0	0	0	0	0	0	0	0	0	0	0	0	0	0	0	0	0	0	0	0	0	0	0	0	0	0	0	0
LRIF1	0	0	0	0	1	0	0	0	0	0	0	0	0	0	0	0	0	0	0	0	0	0	0	0	0	0	0	0	0	0	0	0	0	0	0	0	0	0	0	0	0	0	0	0	0	0	0	0	0
MAGI3	0	0	0	0	1	0	0	0	0	0	0	0	0	0	0	0	0	1	0	0	0	0	0	0	0	0	0	0	0	0	0	0	0	0	0	0	0	0	0	0	0	0	0	0	0	0	0	0	0
SPTA1	0	0	0	0	1	0	0	0	0	0	0	0	0	0	0	0	0	0	0	0	0	0	0	0	0	0	0	0	0	0	0	0	0	0	0	0	0	0	0	0	0	0	0	0	0	0	0	0	0
MPC2	0	0	0	0	1	0	0	0	0	0	0	0	0	0	0	0	0	0	0	0	0	0	0	0	0	0	0	0	0	0	0	0	0	0	0	0	0	0	0	0	0	0	0	0	0	0	0	0	0
TIPRL	0	0	0	0	1	0	0	0	0	0	0	0	0	0	0	0	0	0	0	0	0	0	0	0	0	0	0	0	0	0	0	0	0	0	0	0	0	0	0	0	0	0	0	0	0	0	0	0	0
SEC16B	0	0	0	0	1	0	0	0	0	0	0	0	0	0	0	0	0	0	0	0	0	0	0	0	0	0	0	0	0	0	0	0	0	0	0	0	0	0	0	0	0	0	0	0	0	0	0	0	0
HMCN1	0	0	0	0	1	0	0	0	0	0	0	0	0	0	0	0	0	0	0	0	0	0	0	0	0	0	0	0	0	0	0	0	0	0	0	0	0	0	0	0	0	0	0	0	0	0	0	0	0
PPFIA4	0	0	0	0	1	0	0	0	0	0	0	0	0	0	0	0	0	0	0	0	0	0	0	1	0	0	0	0	0	0	0	0	0	0	0	0	0	0	0	0	0	0	0	0	0	0	0	0	0
TRAF5	0	0	0	0	1	0	0	0	0	0	0	0	0	0	0	0	0	0	0	0	0	0	0	0	0	0	0	0	0	0	0	0	0	0	0	0	0	0	0	0	0	0	0	0	0	0	0	0	0
RAB3GAP2	0	0	0	0	1	0	0	0	0	0	0	0	0	0	0	0	0	0	0	0	0	0	0	0	0	0	0	0	0	0	0	0	0	0	0	0	0	0	0	0	0	0	0	0	0	0	0	0	0
MAP10	0	0	0	0	1	0	0	0	0	0	0	0	0	0	0	0	0	0	0	0	0	0	0	0	0	0	0	0	0	0	0	0	0	0	0	0	0	0	0	0	0	0	0	0	0	0	0	0	0
CHML	0	0	0	0	1	0	0	0	0	0	0	0	0	0	0	0	0	0	0	0	0	0	0	0	0	0	0	0	0	0	0	0	0	0	0	0	0	0	0	0	0	0	0	0	0	0	0	0	0
OR1C1	0	0	0	0	1	0	0	0	0	0	0	0	0	0	0	0	0	0	0	0	0	0	0	0	0	0	0	0	0	0	0	0	0	0	0	0	0	0	0	0	0	0	0	0	0	0	0	0	0
GALNT13	0	0	0	0	1	0	0	0	0	0	0	0	0	0	0	0	0	0	0	0	0	0	0	0	0	0	0	0	0	0	0	0	0	0	0	0	0	0	0	0	0	0	0	0	0	0	0	0	0
COBLL1	0	0	0	0	1	0	0	0	0	0	0	0	0	0	0	0	0	0	0	0	0	0	0	0	0	0	0	0	0	0	0	0	0	0	0	0	0	0	0	0	0	0	0	0	0	0	0	0	0
TRIP12	0	0	0	0	1	0	0	0	0	0	0	0	0	0	0	0	0	0	0	0	0	0	0	0	0	0	0	0	0	0	0	0	0	0	0	0	0	0	0	0	0	0	0	0	0	0	0	0	0
XCR1	0	0	0	0	1	0	0	0	0	0	0	0	0	0	0	0	0	0	0	0	0	0	0	0	0	0	0	0	0	0	0	0	0	0	0	0	0	0	0	0	0	0	0	0	0	0	0	0	0
LSMEM2	0	0	0	0	1	0	0	0	0	0	0	0	0	0	0	0	0	0	0	0	0	0	0	0	0	0	0	0	0	0	0	0	0	0	0	0	0	0	0	0	0	0	0	0	0	0	0	0	0
NIT2	0	0	0	0	1	0	0	0	0	0	0	0	0	0	0	0	0	0	0	0	0	0	0	0	0	0	0	0	0	0	0	0	0	0	0	0	0	0	0	0	0	0	0	0	0	0	0	0	0
TECRL	0	0	0	0	1	0	0	0	0	0	0	0	0	0	0	0	0	0	0	0	0	0	0	0	0	0	0	0	0	0	0	0	0	0	0	0	0	0	0	0	0	0	0	0	0	0	0	0	0
SHROOM3	0	0	0	0	1	0	0	0	0	0	0	0	0	0	0	0	0	0	0	0	0	0	0	0	0	0	0	0	0	0	0	0	0	0	0	0	0	0	0	0	0	0	0	0	0	0	0	0	0
STPG2	0	0	0	0	1	0	0	0	0	0	0	0	0	0	0	0	0	0	0	0	0	0	0	0	0	0	0	0	0	0	0	0	0	0	0	0	0	0	0	0	0	0	0	0	0	0	0	0	0
ICE1	0	0	0	0	1	0	0	0	0	0	0	0	0	0	0	0	0	0	0	0	0	0	0	0	0	0	0	0	0	0	0	0	0	0	0	0	0	0	0	0	0	0	0	0	0	0	0	0	0
SKP2	0	0	0	0	1	0	0	0	0	0	0	0	0	0	0	0	0	0	0	0	0	0	0	0	0	0	0	0	0	0	0	0	0	0	0	0	0	0	0	0	0	0	0	0	0	0	0	0	0
ISL1	0	0	0	0	1	0	0	0	0	0	0	0	0	0	0	0	0	0	0	0	0	0	0	0	0	0	0	0	0	0	0	0	0	0	0	0	0	0	0	0	0	0	0	0	0	0	0	0	0
BDP1	0	0	0	0	1	0	0	0	1	0	0	0	0	0	0	0	0	0	0	0	0	0	0	0	0	0	0	0	0	0	0	0	0	0	0	0	0	0	0	0	0	0	0	0	0	0	0	0	0
POLK	0	0	0	0	1	0	0	0	0	0	0	0	0	0	0	0	1	0	0	0	0	0	0	0	0	0	0	0	0	0	0	0	0	0	0	0	0	0	0	0	0	0	0	0	0	0	0	0	0
ADGRV1	0	0	0	0	1	0	0	0	0	0	0	0	0	0	0	0	0	0	0	0	0	0	0	0	0	0	0	0	0	0	0	0	0	0	0	0	0	0	0	0	0	1	0	0	0	0	0	0	0
PPIP5K2	0	0	0	0	1	0	0	0	0	0	0	0	0	0	0	0	0	0	0	0	0	0	0	0	0	0	0	0	0	0	0	0	0	0	0	0	0	0	0	0	0	0	0	0	0	0	0	0	0
FAM153A	0	0	0	0	1	0	0	0	0	0	0	0	0	0	0	0	0	0	0	0	0	0	0	0	0	0	0	0	0	0	0	0	0	0	0	0	0	0	0	0	0	0	0	0	0	0	0	0	0
RREB1	0	0	0	0	1	0	0	0	0	0	0	0	0	0	0	0	0	0	0	0	0	0	0	0	0	0	0	0	0	0	0	0	0	0	0	0	0	0	0	0	0	0	0	0	0	0	0	0	0
BTN1A1	0	0	0	0	1	0	0	0	0	0	0	0	0	0	0	0	0	0	0	0	0	0	0	0	0	0	0	0	0	0	0	0	0	0	0	0	0	0	0	0	0	0	0	0	0	0	0	0	0
TUBB	0	0	0	0	1	0	0	0	0	0	0	0	0	0	0	0	0	0	0	0	0	0	0	0	0	0	0	0	0	0	0	0	0	0	0	0	0	0	0	0	0	0	0	0	0	0	0	0	0
PRRC2A	0	0	0	0	1	0	0	0	0	0	0	0	0	0	0	0	0	0	0	0	0	0	0	0	0	0	0	0	0	0	0	0	0	0	0	0	0	0	0	0	0	0	0	0	1	0	0	0	0
C6orf47	0	0	0	0	1	0	0	0	0	0	0	0	0	0	0	0	0	0	0	0	0	0	0	0	0	0	0	0	0	0	0	0	0	0	0	0	0	0	0	0	0	0	0	0	0	0	0	0	0
NOTCH4	0	0	0	0	1	0	0	0	0	0	0	0	0	0	0	0	0	0	0	0	0	0	0	0	0	0	0	0	0	0	0	0	0	0	0	0	0	0	0	0	0	0	0	0	0	0	0	0	0
RXRB	0	0	0	0	1	0	0	0	0	0	0	0	0	0	0	0	0	0	0	0	0	0	0	0	0	0	0	0	0	0	0	0	0	0	0	0	0	0	0	0	0	0	0	0	0	0	0	0	0
BICRAL	0	0	0	0	1	0	0	0	0	0	0	0	0	0	0	0	0	0	0	0	0	0	0	0	0	0	0	0	0	0	0	0	0	0	0	0	0	0	0	0	0	0	0	0	0	0	0	0	0
TINAG	0	0	0	0	1	0	0	0	0	0	0	0	0	0	0	0	0	0	0	0	0	0	0	0	0	0	0	0	0	0	0	0	0	0	0	0	0	0	0	0	0	0	0	0	0	0	0	0	0
EYS	0	0	0	0	1	0	0	0	0	0	0	0	0	0	0	0	0	0	0	0	0	0	0	0	0	0	0	0	0	0	0	0	0	0	0	0	0	0	0	0	0	0	0	0	0	0	0	0	0
HTR1E	0	0	0	0	1	0	0	0	0	0	0	0	0	0	0	0	0	1	0	0	0	0	0	0	0	0	0	0	0	0	0	0	0	0	0	0	0	0	0	0	0	0	0	0	0	0	0	0	0
VGLL2	0	0	0	0	1	0	0	0	0	0	0	0	0	0	0	0	0	0	0	0	0	0	0	0	0	0	0	0	0	0	0	0	0	0	0	0	0	0	0	0	0	0	0	0	0	0	0	0	0
HIP1	0	0	0	0	1	0	0	0	0	0	0	0	0	0	0	0	0	0	0	0	0	0	0	0	0	0	0	0	0	0	0	0	0	0	0	0	0	0	0	0	0	0	0	0	0	0	0	0	0
FZD1	0	0	0	0	1	0	0	0	0	0	0	0	0	0	0	0	0	0	0	0	0	0	0	0	0	0	0	0	0	0	0	0	0	0	0	0	0	0	0	0	0	0	0	0	0	0	0	0	0
CALB1	0	0	0	0	1	0	0	0	0	0	0	0	0	0	0	0	0	0	0	0	0	0	0	0	0	0	0	0	0	0	0	0	0	0	0	0	0	0	0	0	0	0	0	0	0	0	0	0	0
SHOC1	0	0	0	0	1	0	0	0	0	0	0	0	0	0	0	0	0	0	0	0	0	0	0	0	0	0	0	0	0	0	0	0	0	0	0	0	0	0	0	0	0	0	0	0	0	0	0	0	0
ASS1	0	0	0	0	1	0	0	0	0	0	0	0	0	0	0	0	0	0	0	0	0	0	0	0	0	0	0	0	0	0	0	0	0	0	0	0	0	0	0	0	0	0	0	0	0	0	0	0	0
ADAMTS13	0	0	0	0	1	0	0	0	0	0	0	0	0	0	0	0	0	0	0	0	0	0	0	0	0	0	0	0	0	0	0	0	0	0	0	0	0	0	0	0	0	0	0	0	0	0	0	0	0
DNA2	0	0	0	0	1	0	0	0	0	0	0	0	0	0	0	0	0	0	0	0	0	0	0	0	0	0	0	0	0	0	0	0	0	0	0	0	0	0	0	0	0	0	0	0	0	0	0	0	0
TACC2	0	0	0	0	1	0	0	0	0	0	0	0	0	0	0	0	0	0	0	0	0	0	0	0	0	0	0	0	0	0	0	0	0	0	0	0	0	0	0	1	0	0	0	0	0	0	0	0	0
INSYN2A	0	0	0	0	1	0	0	0	0	0	0	0	0	0	0	0	0	0	0	0	0	0	0	0	0	0	0	0	0	0	0	0	0	0	0	0	0	0	0	0	0	0	0	0	0	0	0	0	0
JAKMIP3	0	0	0	0	1	0	0	0	0	0	0	0	0	0	0	0	0	0	0	0	0	0	0	0	0	0	0	0	0	0	0	0	0	0	0	0	0	0	0	0	0	0	0	0	0	0	0	0	0
NUP160	0	0	0	0	1	0	0	0	0	0	0	0	0	0	0	0	0	0	0	0	0	0	0	0	0	0	0	0	0	0	0	0	0	0	0	0	0	0	0	0	0	0	0	0	0	0	0	0	0
RIMKLB	0	0	0	0	1	0	0	0	0	0	0	0	0	0	0	0	0	0	0	0	0	0	0	0	0	0	0	0	0	0	0	0	0	0	0	0	0	0	0	0	0	0	0	0	0	0	0	0	0
TSPAN11	0	0	0	0	1	0	0	0	0	0	0	0	0	0	0	0	0	0	0	0	0	0	0	0	0	0	0	0	0	0	0	0	0	0	0	0	0	0	0	0	0	0	0	0	0	0	0	0	0
LRP1	0	0	0	0	1	0	0	0	0	0	0	0	0	0	0	0	0	0	0	0	0	0	0	0	0	0	0	0	0	0	0	0	0	0	0	0	0	0	0	0	0	0	0	0	0	0	0	0	0
SRGAP1	0	0	0	0	1	0	0	0	0	0	0	0	0	0	0	0	0	0	1	0	0	0	0	0	0	0	0	0	0	0	0	0	0	0	0	0	0	0	0	0	0	0	0	0	0	0	0	0	0
XPOT	0	0	0	0	1	0	0	0	0	0	0	0	0	0	0	0	0	0	0	0	0	0	0	0	0	0	0	0	0	0	0	0	0	0	0	0	0	0	0	0	0	0	0	0	0	0	0	0	0
KLHL1	0	0	0	0	1	0	0	0	0	0	0	0	0	0	0	0	0	0	0	0	0	0	0	0	0	0	0	0	0	0	0	0	0	0	0	0	0	0	0	0	0	0	0	0	0	0	0	0	0
DIS3	0	0	0	0	1	0	0	0	0	0	0	0	0	0	0	0	0	0	0	0	0	0	0	0	0	0	1	0	0	0	0	0	0	0	0	0	0	1	0	0	0	0	0	0	0	0	0	0	0
SLITRK6	0	0	0	0	1	0	0	0	0	0	0	0	0	0	0	0	0	0	0	0	0	0	0	0	0	0	0	0	0	0	0	0	0	0	0	0	0	0	0	0	0	0	0	0	0	0	0	0	0
TUBGCP3	0	0	0	0	1	0	0	0	0	1	0	0	0	0	0	0	0	0	0	0	0	0	0	0	0	0	0	0	0	0	0	0	0	0	0	0	0	0	0	0	0	0	0	0	0	0	0	0	0
RPGRIP1	0	0	0	0	1	0	0	0	0	0	0	0	0	0	0	0	0	0	0	0	0	0	0	0	0	0	0	0	0	0	0	0	0	0	0	0	0	0	0	0	0	0	0	0	0	0	0	0	0
KIAA0586	0	0	0	0	1	0	0	0	0	0	0	0	0	0	0	0	0	0	0	0	0	0	0	0	0	0	0	0	0	0	0	0	0	0	0	0	0	0	0	0	0	0	0	0	0	0	0	0	0
VPS39	0	0	0	0	1	0	0	0	0	0	0	0	0	0	0	0	0	0	0	0	0	0	0	0	0	0	0	0	0	0	0	0	0	0	0	0	0	0	0	0	0	0	0	0	0	0	0	0	0
SECISBP2L	0	0	0	0	1	0	0	0	0	0	0	0	0	0	0	0	0	0	0	0	0	0	0	0	0	0	0	0	0	0	0	0	0	0	0	0	0	0	0	0	0	0	0	0	0	0	0	0	0
FAM227B	0	0	0	0	1	0	0	0	0	0	0	0	0	0	0	0	0	0	0	0	0	0	0	0	0	0	0	0	0	0	0	0	0	0	0	0	0	0	0	0	0	0	0	0	0	0	0	0	0
HEXA	0	0	0	0	1	0	0	0	0	0	0	0	0	0	0	0	0	0	0	0	0	0	0	0	0	0	0	0	0	0	0	0	0	0	0	0	0	0	0	0	0	0	0	0	0	0	0	0	0
SYNM	0	0	0	0	1	0	0	0	0	0	0	0	0	0	0	0	0	0	0	0	0	0	0	0	0	0	0	0	0	0	0	0	0	0	0	0	0	0	0	0	0	0	0	0	0	0	0	0	0
ZNF764	0	0	0	0	1	0	0	0	0	0	0	0	0	0	0	0	0	0	0	0	0	0	0	0	0	0	0	0	0	0	0	0	0	0	0	0	0	0	0	0	0	0	0	0	0	0	0	0	0
NFE2L1	0	0	0	0	1	0	0	0	0	0	0	0	0	0	0	0	0	0	0	0	0	0	0	0	0	0	0	0	0	0	0	0	0	0	0	0	0	0	0	0	0	0	0	0	0	0	0	0	0
MED13	0	0	0	0	1	0	0	0	0	0	0	0	0	0	0	0	0	0	0	0	0	0	0	0	1	0	0	0	0	0	0	0	0	0	0	0	0	0	0	0	0	0	0	0	0	0	0	0	0
NPTX1	0	0	0	0	1	0	0	0	0	0	0	0	0	0	0	0	0	0	0	0	0	0	0	0	0	0	0	0	0	0	0	0	0	0	0	0	0	0	0	0	0	0	0	0	0	0	0	0	0
NARF	0	0	0	0	1	0	0	0	0	0	0	0	0	0	0	0	0	0	0	0	0	0	0	0	0	0	0	0	0	0	0	0	0	0	0	0	0	0	0	0	0	0	0	0	0	0	0	0	0
FBN3	0	0	0	0	1	0	0	0	0	0	0	0	0	0	0	0	0	0	0	0	0	0	0	0	0	0	0	0	0	0	0	0	0	0	0	0	0	0	0	0	0	0	0	0	0	0	0	0	0
DMKN	0	0	0	0	1	0	0	0	0	0	0	0	0	0	0	0	0	0	0	0	0	0	0	0	0	0	0	0	0	0	0	0	0	0	0	0	0	0	0	0	0	0	0	0	0	0	0	0	0
YIF1B	0	0	0	0	1	0	0	0	0	0	0	0	0	0	0	0	0	0	0	0	0	0	0	0	0	0	0	0	0	0	0	0	0	0	0	0	0	0	0	0	0	0	0	0	0	0	0	0	0
LYPD3	0	0	0	0	1	0	0	0	0	0	0	0	0	0	0	0	0	0	0	0	0	0	0	0	0	0	0	0	0	0	0	0	0	0	0	0	0	0	0	0	0	0	0	0	0	0	0	0	0
ZNF404	0	0	0	0	1	0	0	0	0	0	0	0	0	0	0	0	0	0	0	0	0	0	0	0	0	0	0	0	0	0	0	0	0	0	0	0	0	0	0	0	0	0	0	0	0	0	0	0	0
RBM39	0	0	0	0	1	0	0	0	0	0	0	0	0	0	0	0	0	0	0	0	0	0	0	0	0	0	0	0	0	0	0	0	0	0	0	0	0	0	0	0	0	0	0	0	0	0	0	0	0
CTCFL	0	0	0	0	1	0	0	0	0	0	0	0	0	0	0	0	0	0	0	0	0	0	0	0	0	0	0	0	0	0	0	0	0	0	0	0	0	0	0	0	0	0	0	0	0	0	0	0	0
MCM5	0	0	0	0	1	0	0	0	0	0	0	0	0	0	0	0	0	0	0	0	0	0	0	0	0	0	0	0	0	0	0	0	0	0	0	0	0	0	0	0	0	0	0	0	0	0	0	0	0
EP300	0	0	0	0	1	0	0	0	0	0	0	0	0	0	0	0	0	0	0	0	0	0	0	1	0	0	0	0	0	0	0	0	0	0	0	0	0	0	1	0	0	0	0	0	0	0	0	0	0
NAA10	0	0	0	0	1	0	0	0	0	0	0	0	0	0	0	0	0	0	0	0	0	0	0	0	0	0	0	0	0	0	0	0	0	0	0	0	0	0	0	0	0	0	0	0	0	0	0	0	0
KDM5D	0	0	0	0	1	0	0	0	0	0	0	0	0	0	0	0	0	0	0	0	0	0	0	0	0	0	0	0	0	0	0	0	0	0	0	0	0	0	0	0	0	0	0	0	0	0	0	0	0
ATAD3A	0	0	0	0	0	1	0	0	0	0	0	0	0	0	0	0	0	0	0	0	0	0	0	0	0	0	0	0	0	0	0	0	0	0	0	0	0	0	0	0	0	0	0	0	0	0	0	0	0
PIGC	0	0	0	0	0	1	0	0	0	0	0	0	0	0	0	0	0	0	0	0	0	0	0	0	0	0	0	0	0	0	0	0	0	0	0	0	0	0	0	0	0	0	0	0	0	0	0	0	0
NCF2	0	0	0	0	0	1	0	0	0	0	0	0	0	0	0	0	0	0	0	0	0	0	0	0	0	0	0	0	0	0	0	0	0	0	0	0	0	0	0	0	0	0	0	0	0	0	0	0	0
DEGS1	0	0	0	0	0	1	0	0	0	0	0	0	0	0	0	0	0	0	0	0	0	0	0	0	0	0	0	0	0	0	0	0	0	0	0	0	0	0	0	0	0	0	0	0	0	0	0	0	0
OR2T10	0	0	0	0	0	1	0	0	0	0	0	0	0	0	0	0	0	0	0	0	0	0	0	0	0	0	0	0	0	0	0	0	0	0	0	0	0	0	0	0	0	0	0	0	0	0	0	0	0
CAD	0	0	0	0	0	1	0	0	0	0	0	0	0	0	0	0	0	0	0	0	0	0	0	0	0	0	0	0	0	0	0	0	0	0	0	0	0	0	0	0	0	0	0	0	0	0	0	0	0
PRKCE	0	0	0	0	0	1	0	0	0	0	0	0	0	0	0	0	0	0	0	0	0	0	0	0	0	0	0	0	0	0	0	0	0	0	0	0	0	0	0	0	0	0	0	0	0	0	0	0	0
VPS54	0	0	0	0	0	1	0	0	0	0	0	0	0	0	0	0	0	0	0	0	0	0	0	0	0	0	0	0	0	0	0	0	0	0	0	0	0	0	0	0	0	0	0	0	0	0	0	0	0
SLIT2	0	0	0	0	0	1	0	0	0	0	0	0	0	0	0	0	0	0	0	0	0	0	0	0	0	0	0	0	0	0	0	0	0	0	0	0	0	0	0	0	0	0	0	0	0	0	0	0	0
EPHA5	0	0	0	0	0	1	0	0	0	0	0	0	0	0	0	0	0	0	0	0	0	0	0	0	0	0	0	0	0	0	0	0	0	0	0	0	0	0	0	0	0	0	0	0	0	0	0	0	0
PAIP1	0	0	0	0	0	1	0	0	0	0	0	0	0	0	0	0	0	0	0	0	0	0	0	0	0	0	0	0	0	0	0	0	0	0	0	0	0	0	0	0	0	0	0	0	0	0	0	0	0
NKAPL	0	0	0	0	0	1	0	0	0	0	0	0	0	0	0	0	0	0	0	0	0	0	0	0	0	0	0	0	0	0	0	0	0	0	0	0	0	0	0	0	0	0	0	0	0	0	0	0	0
BRD2	0	0	0	0	0	1	0	0	0	0	0	0	0	0	0	0	0	0	0	0	0	0	0	0	0	0	0	0	0	0	0	0	0	0	0	0	0	0	0	0	0	0	0	0	0	0	0	0	0
CEP162	0	0	0	0	0	1	0	0	0	0	0	0	0	0	0	0	0	0	0	0	0	0	0	0	0	0	0	0	0	0	0	0	0	0	0	0	0	0	0	0	0	0	0	0	0	0	0	0	0
PNPLA8	0	0	0	0	0	1	0	0	0	0	1	0	0	0	0	0	0	0	0	0	0	0	0	0	0	0	0	0	0	0	0	0	0	0	0	0	0	0	0	0	0	0	0	0	0	0	0	0	0
CALU	0	0	0	0	0	1	0	0	0	0	0	0	0	0	0	0	0	0	0	0	0	0	0	0	0	0	0	0	0	0	0	0	0	0	0	0	0	0	0	0	0	0	0	0	0	0	0	0	0
PLEC	0	0	0	0	0	1	0	0	0	0	0	0	0	0	0	0	0	0	0	0	0	0	0	0	0	0	0	0	0	0	0	0	0	0	0	0	0	0	0	0	0	0	0	0	0	0	0	0	0
CHUK	0	0	0	0	0	1	0	0	0	0	0	0	0	0	0	0	0	0	0	0	0	0	0	0	0	0	0	0	0	0	0	0	0	0	0	0	0	0	0	0	0	0	0	0	0	0	0	0	0
HIF1A	0	0	0	0	0	1	0	0	0	0	0	0	0	0	0	0	0	0	0	0	0	0	0	0	0	0	0	0	0	0	0	0	0	0	0	0	0	0	0	0	0	0	0	0	0	0	0	0	0
MGA	0	0	0	0	0	1	0	0	0	0	0	0	0	0	0	0	0	0	0	0	0	0	0	0	0	0	0	0	0	0	0	0	0	0	0	0	0	0	0	0	0	0	0	0	0	0	0	0	0
MYO1E	0	0	0	0	0	1	0	0	0	0	0	0	0	0	0	0	0	0	0	0	0	0	0	0	0	0	0	0	0	0	0	0	0	0	0	0	0	0	0	0	0	0	0	0	0	0	0	0	0
NGRN	0	0	0	0	0	1	0	0	0	0	0	0	0	0	0	0	0	0	0	0	0	0	0	0	0	0	0	0	0	0	0	0	0	0	0	0	0	0	0	0	0	0	0	0	0	0	0	0	0
TBC1D16	0	0	0	0	0	1	0	0	0	0	0	0	0	0	0	0	0	0	0	0	0	0	0	0	0	0	0	0	0	0	0	0	0	0	0	0	0	0	0	0	0	0	0	0	0	0	0	0	0
EPS15L1	0	0	0	0	0	1	0	0	0	0	0	0	0	0	0	0	0	0	0	0	0	0	0	0	0	0	0	0	0	0	0	0	0	0	0	0	0	0	0	0	0	0	0	0	0	0	0	0	0
ATP4A	0	0	0	0	0	1	0	0	0	0	0	0	0	0	0	0	0	0	0	0	0	0	0	0	0	0	0	0	0	0	0	0	0	0	0	0	0	0	0	0	0	0	0	0	0	0	0	0	0
RYR1	0	0	0	0	0	1	0	0	0	0	0	0	0	0	0	0	0	0	0	0	0	0	0	0	0	0	0	0	0	0	0	0	0	0	0	0	0	0	0	0	1	0	0	0	0	0	0	0	0
ZNF234	0	0	0	0	0	1	0	0	0	0	0	0	0	0	0	0	0	0	0	0	0	0	0	0	0	0	0	0	0	0	0	0	0	0	0	0	0	0	0	0	0	0	0	0	0	0	0	0	0
ZNF473	0	0	0	0	0	1	0	0	0	0	0	0	0	0	0	0	0	0	0	0	0	0	0	0	0	0	0	0	0	0	0	0	0	0	0	0	0	0	0	0	0	0	0	0	0	0	0	0	0
POLD1	0	0	0	0	0	1	0	0	0	0	0	0	0	0	0	0	0	0	0	0	0	0	0	0	0	0	0	0	0	0	0	0	0	0	0	0	0	0	0	0	0	0	0	0	0	0	0	0	0
NF2	0	0	0	0	0	1	0	0	0	0	0	0	0	0	0	0	0	0	0	0	0	0	0	0	0	0	0	0	0	0	0	0	0	0	0	0	0	0	0	1	0	0	0	0	0	0	0	0	0
GTPBP6	0	0	0	0	0	1	0	0	0	0	0	0	0	0	0	0	0	0	0	0	0	0	0	0	0	0	0	0	0	0	0	0	0	0	0	0	0	0	0	0	0	0	0	0	0	0	0	0	0
RCC2	0	0	0	0	0	0	1	0	0	0	0	0	0	0	0	0	0	0	0	0	0	0	0	0	0	0	0	0	0	0	0	0	0	0	0	0	0	0	0	0	0	0	0	0	0	0	0	0	0
TEKT2	0	0	0	0	0	0	1	0	0	0	0	0	0	0	0	0	0	0	0	0	0	0	0	0	0	0	0	0	0	0	0	0	0	0	0	0	0	0	0	0	0	0	0	0	0	0	0	0	0
USP33	0	0	0	0	0	0	1	0	0	0	0	0	0	0	0	0	0	0	0	0	0	0	0	0	0	0	0	0	0	0	0	0	0	0	0	0	0	0	0	0	0	0	0	0	0	0	0	0	0
TPR	0	0	0	0	0	0	1	0	0	0	0	0	0	0	0	0	0	0	0	0	0	0	0	0	0	0	0	0	0	0	0	0	0	0	0	0	0	0	0	0	0	0	0	0	0	0	0	0	0
HHIPL2	0	0	0	0	0	0	1	0	0	0	0	0	0	0	0	0	0	0	0	0	0	0	0	0	0	0	0	0	0	0	0	0	0	1	0	0	0	0	0	0	0	0	0	0	0	0	0	0	0
DNMT3A	0	0	0	0	0	0	1	0	0	0	0	0	0	0	0	0	0	0	0	0	0	0	0	0	0	0	0	0	0	0	0	0	0	0	0	0	0	0	0	0	0	0	0	0	0	0	0	0	0
ALMS1	0	0	0	0	0	0	1	0	0	0	0	0	0	0	0	0	0	0	0	0	0	0	0	0	0	0	0	0	0	0	0	0	0	0	0	0	0	0	0	0	0	0	0	0	0	0	0	0	0
APBB2	0	0	0	0	0	0	1	0	0	0	0	0	0	0	0	0	0	0	0	0	0	0	0	0	0	0	0	0	0	0	0	0	0	0	0	0	0	0	0	0	0	0	0	0	0	0	0	0	0
CLPTM1L	0	0	0	0	0	0	1	0	0	0	0	0	0	0	0	0	0	0	0	0	0	0	0	0	0	0	0	0	0	0	0	0	0	0	0	0	0	0	0	0	0	0	0	0	0	0	0	0	0
NSUN2	0	0	0	0	0	0	1	0	0	0	0	0	0	0	0	0	0	0	0	0	0	0	0	0	0	0	0	0	0	0	0	0	0	0	0	0	0	0	0	0	0	0	0	0	0	0	0	0	0
HLA-DPA1	0	0	0	0	0	0	1	0	0	0	0	0	0	0	0	0	0	0	0	0	0	0	0	0	0	0	0	0	0	0	0	0	0	0	0	0	0	0	0	0	0	0	0	0	0	0	0	0	0
MYO6	0	0	0	0	0	0	1	0	0	0	0	0	0	0	0	0	0	0	0	0	0	0	0	0	0	0	0	0	0	0	0	0	0	0	0	0	0	0	0	0	0	0	0	0	0	0	0	0	0
MICALL2	0	0	0	0	0	0	1	0	0	0	0	0	0	0	0	0	0	0	0	0	0	0	0	0	0	0	0	0	0	0	0	0	0	0	0	0	0	0	0	0	0	0	0	0	0	0	0	0	0
GPNMB	0	0	0	0	0	0	1	0	0	0	0	0	0	0	0	0	0	0	0	0	0	0	0	0	0	0	0	0	0	0	0	0	0	0	0	0	0	0	0	0	0	0	0	0	0	0	0	0	0
ESYT2	0	0	0	0	0	0	1	0	0	0	0	0	0	0	0	0	0	0	0	0	0	0	0	0	0	0	0	0	0	0	0	0	0	0	0	0	0	0	0	0	0	0	0	0	0	0	0	0	0
RP1	0	0	0	0	0	0	1	0	0	0	0	0	0	0	0	0	0	0	0	0	0	0	0	0	0	0	0	0	0	0	0	0	0	0	0	0	0	0	0	0	0	0	0	0	0	0	0	0	0
ZNF658	0	0	0	0	0	0	1	0	0	0	0	0	0	0	0	0	0	0	0	0	0	0	0	0	0	0	0	0	0	0	0	0	0	0	0	0	0	0	0	0	0	0	0	0	0	0	0	0	0
HHEX	0	0	0	0	0	0	1	0	0	0	0	0	0	0	0	0	0	0	0	0	0	0	0	0	0	0	0	0	0	0	0	0	0	0	0	0	0	0	0	0	0	0	0	0	0	0	0	0	0
EIF4G2	0	0	0	0	0	0	1	0	0	0	0	0	0	0	0	0	0	0	0	0	0	0	0	0	0	0	0	0	0	0	0	0	0	0	0	0	0	0	0	0	1	0	0	0	0	0	0	0	0
INPPL1	0	0	0	0	0	0	1	0	0	0	0	0	0	0	0	0	0	0	0	0	0	0	0	0	0	0	0	0	0	0	0	0	0	0	0	0	0	0	0	0	0	0	0	0	0	0	0	0	0
RAB21	0	0	0	0	0	0	1	0	0	0	0	0	0	0	0	0	0	0	0	0	0	0	0	0	0	0	0	0	0	0	0	0	0	0	0	0	0	0	0	0	0	0	0	0	0	0	0	0	0
PDS5B	0	0	0	0	0	0	1	0	0	0	0	0	0	0	0	0	0	0	0	0	0	0	0	0	0	0	0	0	0	0	0	0	0	0	0	0	0	0	0	0	0	0	0	0	0	0	0	0	0
OR10G3	0	0	0	0	0	0	1	0	0	0	0	0	0	0	0	0	0	0	0	0	0	0	0	0	0	0	0	0	0	0	0	0	0	0	0	0	0	0	0	0	0	0	0	0	0	0	0	0	0
RDH11	0	0	0	0	0	0	1	0	0	0	0	0	0	0	0	0	0	0	0	0	0	0	0	0	0	0	0	0	0	0	0	0	0	0	0	0	0	0	0	0	0	0	0	0	0	0	0	0	0
ZFYVE19	0	0	0	0	0	0	1	0	0	0	0	0	0	0	0	0	0	0	0	0	0	0	0	0	0	0	0	0	0	0	0	0	0	0	0	0	0	0	0	0	0	0	0	0	0	0	0	0	0
CCT6B	0	0	0	0	0	0	1	0	0	0	0	0	0	0	0	0	0	0	0	0	0	0	0	0	0	0	0	0	0	0	0	0	0	0	0	0	0	0	0	0	0	0	0	0	0	0	0	0	0
KRT24	0	0	0	0	0	0	1	0	0	0	0	0	0	0	0	0	0	0	0	0	0	0	0	0	0	0	0	0	0	0	0	0	0	0	0	0	0	0	0	0	0	0	0	0	0	0	0	0	0
APOH	0	0	0	0	0	0	1	0	0	0	0	0	0	0	0	0	0	0	0	0	0	0	0	0	0	0	0	0	1	0	0	0	0	0	0	0	0	0	0	0	0	0	0	0	0	0	0	0	0
COG1	0	0	0	0	0	0	1	0	0	0	0	0	0	0	0	0	0	0	0	0	0	0	0	0	0	0	0	0	0	0	0	0	0	0	0	0	0	0	0	0	0	0	0	0	0	0	0	0	0
TMEM59L	0	0	0	0	0	0	1	0	0	0	0	0	0	0	0	0	0	0	0	0	0	0	0	0	0	0	0	0	0	0	0	0	0	0	0	0	0	0	0	0	0	0	0	0	0	0	0	0	0
ZNF607	0	0	0	0	0	0	1	0	0	0	0	0	0	0	0	0	0	0	0	0	0	0	0	0	0	0	0	0	0	0	0	0	0	0	0	0	0	0	0	0	0	0	0	0	0	0	0	0	0
MZF1	0	0	0	0	0	0	1	0	0	0	0	0	0	0	0	0	0	0	0	0	0	0	0	0	0	0	0	0	0	0	0	0	0	0	0	0	0	0	0	0	0	0	0	0	0	0	0	0	0
PYGB	0	0	0	0	0	0	1	0	0	0	0	0	0	0	0	0	0	0	0	0	0	0	0	0	0	0	0	0	0	0	0	0	0	0	0	0	0	0	0	0	0	0	0	0	0	0	0	0	0
MAGEA4	0	0	0	0	0	0	1	0	0	0	0	0	0	0	0	0	0	0	0	0	0	0	0	0	0	0	0	0	0	0	0	0	0	0	0	0	0	0	0	0	0	0	0	0	0	0	0	0	0
CYP4A11	0	0	0	0	0	0	0	1	0	0	0	0	0	0	0	0	0	0	0	0	0	0	0	0	0	0	0	0	0	0	0	0	0	0	0	0	0	0	0	0	0	0	0	0	0	0	0	0	0
SCP2	0	0	0	0	0	0	0	1	0	0	0	0	0	0	0	0	0	0	0	0	0	0	0	0	0	0	0	0	0	0	0	0	0	0	0	0	0	0	0	0	0	0	0	0	0	0	0	0	0
SRSF11	0	0	0	0	0	0	0	1	0	0	0	0	0	0	0	0	0	0	0	0	0	0	0	0	0	0	0	0	0	0	0	0	0	0	0	0	0	0	0	0	0	0	0	0	0	0	0	0	0
LRRC8D	0	0	0	0	0	0	0	1	0	0	0	0	0	0	0	0	0	0	0	0	0	0	0	0	0	0	0	0	0	0	0	0	0	0	0	0	0	0	0	0	0	0	0	0	0	0	0	0	0
EVI5	0	0	0	0	0	0	0	1	0	0	0	0	0	0	0	0	0	0	0	0	0	0	0	0	0	0	0	0	0	0	0	0	0	0	0	0	0	0	0	0	0	0	0	0	0	0	0	0	0
KCNT2	0	0	0	0	0	0	0	1	0	0	0	0	0	0	0	0	0	0	0	0	0	0	0	0	0	0	0	0	0	0	0	0	0	0	0	0	0	0	0	0	0	0	0	0	0	0	0	0	0
URB2	0	0	0	0	0	0	0	1	0	0	0	0	0	0	0	0	0	0	0	0	0	0	0	0	0	0	0	0	0	0	0	0	0	0	0	0	0	0	0	0	0	0	0	0	0	0	0	0	0
TSGA10	0	0	0	0	0	0	0	1	0	0	0	0	0	0	0	0	0	0	0	0	0	0	0	0	0	0	0	0	0	0	0	0	0	0	0	0	0	0	0	0	0	0	0	0	0	0	0	0	0
GALNT5	0	0	0	0	0	0	0	1	0	0	0	0	0	0	0	0	0	0	0	0	0	0	0	0	0	1	0	0	0	0	0	0	0	0	0	0	0	0	0	0	0	0	0	0	0	0	0	0	0
XIRP2	0	0	0	0	0	0	0	1	0	0	0	0	0	0	0	0	0	0	0	0	0	0	0	0	0	0	0	0	0	0	0	0	0	0	0	0	0	0	0	0	0	0	0	0	0	0	0	0	0
SPC25	0	0	0	0	0	0	0	1	0	0	0	0	0	0	0	0	0	0	0	0	0	0	0	0	0	0	0	0	0	0	0	0	0	0	0	0	0	0	0	0	0	0	0	0	0	0	0	0	0
AOX1	0	0	0	0	0	0	0	1	0	0	0	0	0	0	0	0	0	0	0	0	0	0	0	0	0	0	0	0	0	0	0	0	0	0	0	0	0	0	0	0	0	0	0	0	0	0	0	0	0
SPHKAP	0	0	0	0	0	0	0	1	0	0	0	0	0	0	0	0	0	0	0	0	0	0	1	0	0	0	0	0	0	0	0	0	0	0	0	0	0	0	0	0	0	0	0	0	0	0	0	0	0
UGT1A7	0	0	0	0	0	0	0	1	0	0	0	0	0	0	0	0	0	0	0	0	0	0	0	0	0	0	0	0	0	0	0	0	0	0	0	0	0	0	0	0	0	0	0	0	0	0	0	0	0
FBLN2	0	0	0	0	0	0	0	1	0	0	0	0	0	0	0	0	0	0	0	0	0	0	0	0	0	0	0	0	0	0	0	0	0	0	0	0	0	0	0	0	0	0	0	0	0	0	0	0	0
RFTN1	0	0	0	0	0	0	0	1	0	0	0	0	0	0	0	0	0	0	0	0	0	0	0	0	0	0	0	0	0	0	0	0	0	0	0	0	0	0	0	0	0	0	0	0	0	0	0	0	0
NEK10	0	0	0	0	0	0	0	1	0	0	0	0	0	0	0	0	0	0	0	0	0	0	0	0	0	0	0	0	0	0	0	0	0	0	0	0	0	0	0	0	0	0	0	0	0	0	0	0	0
MST1R	0	0	0	0	0	0	0	1	0	0	0	0	0	0	0	0	0	0	0	0	0	0	0	0	0	0	0	0	0	0	0	0	0	0	0	0	0	0	0	0	0	0	0	0	0	0	0	0	0
PTPRG	0	0	0	0	0	0	0	1	0	0	0	0	0	0	0	0	0	0	0	0	0	0	0	0	0	0	0	0	0	0	0	0	0	0	0	0	0	0	0	0	0	0	0	0	0	0	0	0	0
DPPA2	0	0	0	0	0	0	0	1	0	0	0	0	0	0	0	0	0	0	0	0	0	0	0	0	0	0	0	0	0	0	0	0	0	0	0	0	0	0	0	0	0	0	0	0	0	0	0	0	0
MME	0	0	0	0	0	0	0	1	0	0	0	0	0	0	0	0	0	0	0	0	0	0	0	0	0	0	0	0	0	0	0	0	0	0	0	0	0	0	0	0	0	0	0	0	0	0	0	0	0
SHOX2	0	0	0	0	0	0	0	1	0	0	0	0	0	0	0	0	0	0	0	0	0	0	0	0	0	0	0	0	0	0	0	0	0	0	0	0	0	0	0	0	0	0	0	0	0	0	0	0	0
CTNND2	0	0	0	0	0	0	0	1	0	0	0	0	0	0	0	0	0	0	0	0	0	0	0	0	0	0	0	0	0	0	0	0	0	0	0	0	0	0	0	0	0	0	0	0	0	0	0	0	0
MTMR12	0	0	0	0	0	0	0	1	0	0	0	0	0	0	0	0	0	0	0	0	0	0	0	0	0	0	0	0	0	0	0	0	0	0	0	0	0	0	0	0	0	0	0	0	0	0	0	0	0
AFF4	0	0	0	0	0	0	0	1	0	0	0	0	0	0	0	0	0	0	0	0	0	0	0	0	0	0	0	0	0	0	0	0	0	0	0	0	0	0	0	0	0	0	0	0	0	0	0	0	0
GEMIN5	0	0	0	0	0	0	0	1	0	0	0	0	0	0	0	0	0	0	0	0	0	0	0	0	0	0	0	0	0	0	0	0	0	0	0	0	0	0	0	0	0	0	0	0	0	0	0	0	0
GABRG2	0	0	0	0	0	0	0	1	0	0	0	0	0	0	0	0	0	0	0	0	0	0	0	0	0	0	0	0	0	0	0	1	0	0	0	0	0	0	0	0	0	0	0	0	0	0	0	0	0
JARID2	0	0	0	0	0	0	0	1	0	0	0	0	0	0	0	0	0	0	0	0	0	0	0	0	0	0	0	0	0	0	0	0	0	0	0	0	0	0	0	0	0	0	0	0	0	0	0	0	0
IGF2R	0	0	0	0	0	0	0	1	0	0	0	0	0	0	0	0	0	0	0	0	0	0	0	0	0	0	0	0	0	0	0	0	0	0	0	0	0	0	0	0	0	0	0	0	0	0	0	0	0
CARD11	0	0	0	0	0	0	0	1	0	0	0	0	0	0	0	0	0	0	0	0	0	0	0	0	0	0	0	0	0	0	0	1	0	0	0	0	0	0	0	0	0	0	0	0	0	0	0	0	0
DDC	0	0	0	0	0	0	0	1	0	0	0	0	0	0	0	0	0	0	0	0	0	0	0	0	0	0	0	0	0	0	0	0	0	0	0	0	0	0	0	0	0	0	0	0	0	0	0	0	0
TMEM243	0	0	0	0	0	0	0	1	0	0	0	0	0	0	0	0	0	0	0	0	0	0	0	0	0	0	0	0	0	0	0	1	0	0	0	0	0	0	0	0	0	0	0	0	0	0	0	0	0
CAPZA2	0	0	0	0	0	0	0	1	0	0	0	0	0	0	0	0	0	0	0	0	0	0	0	0	0	0	0	0	0	0	0	0	0	0	0	0	0	0	0	0	0	0	0	0	0	0	0	0	0
FAM71F1	0	0	0	0	0	0	0	1	0	0	0	0	0	0	0	0	0	0	0	0	0	0	0	0	0	0	0	0	0	0	0	0	0	0	0	0	0	0	0	0	0	0	0	0	0	0	0	0	0
KMT2C	0	0	0	0	0	0	0	1	0	0	0	0	0	0	0	0	0	1	0	0	0	0	0	0	0	0	0	0	0	0	0	0	1	0	0	0	0	0	0	0	0	0	0	0	0	0	0	0	0
NAT1	0	0	0	0	0	0	0	1	0	0	0	0	0	0	0	0	0	0	0	0	0	0	0	0	0	0	0	0	0	0	0	0	0	0	0	0	0	0	0	0	0	0	0	0	0	0	0	0	0
HOOK3	0	0	0	0	0	0	0	1	0	0	0	0	0	0	0	0	0	0	0	0	0	0	0	0	0	0	0	0	0	0	0	0	0	0	0	0	0	0	0	0	0	0	0	0	0	0	0	0	0
PKHD1L1	0	0	0	0	0	0	0	1	0	0	0	0	0	0	0	0	0	0	0	0	0	0	0	0	0	0	0	0	0	0	0	0	0	0	0	0	0	0	0	0	0	0	0	0	0	0	0	0	0
SLC18A3	0	0	0	0	0	0	0	1	0	0	0	0	0	0	0	0	0	0	0	0	0	0	0	0	0	0	0	0	0	0	0	0	0	0	0	0	0	0	0	0	0	0	0	0	0	0	0	0	0
KIF20B	0	0	0	0	0	0	0	1	0	1	0	0	0	0	0	0	0	0	0	0	0	0	0	0	0	0	0	0	0	0	0	0	1	0	0	0	0	0	0	0	0	0	0	0	0	0	0	0	0
AFAP1L2	0	0	0	0	0	0	0	1	0	0	0	0	0	0	0	0	0	0	0	0	0	0	0	0	0	0	0	0	0	0	0	0	0	0	0	0	0	0	0	0	0	0	0	0	0	0	0	0	0
TSPAN32	0	0	0	0	0	0	0	1	0	0	0	0	0	0	0	0	0	0	0	0	0	0	0	0	0	0	0	0	0	0	0	0	0	0	0	0	0	0	0	0	0	0	0	0	0	0	0	0	0
ZDHHC5	0	0	0	0	0	0	0	1	0	0	0	0	0	0	0	0	0	0	0	0	0	0	0	0	0	0	0	0	0	0	0	0	0	0	0	0	0	0	0	0	0	0	0	0	0	0	0	0	0
PRPF19	0	0	0	0	0	0	0	1	0	0	0	0	0	0	0	0	0	0	0	0	0	0	0	0	0	0	0	0	0	0	0	0	0	0	0	0	0	0	0	0	0	0	0	0	0	0	0	0	0
KDM4D	0	0	0	0	0	0	0	1	0	0	0	0	0	0	0	0	0	0	0	0	0	0	0	0	0	0	0	0	0	0	0	0	0	0	0	0	0	0	0	0	0	0	0	0	0	0	0	0	0
ABCG4	0	0	0	0	0	0	0	1	0	0	0	0	0	0	0	0	0	0	0	0	0	0	0	0	0	0	0	0	0	0	0	0	0	0	0	0	0	0	0	0	0	0	0	0	0	0	0	0	0
OR8B12	0	0	0	0	0	0	0	1	0	0	0	0	0	0	0	0	0	0	0	0	0	0	0	0	0	0	0	0	0	0	0	0	0	0	0	0	0	0	0	0	0	0	0	0	0	0	0	0	0
CLEC9A	0	0	0	0	0	0	0	1	0	0	0	0	0	0	0	0	0	0	0	0	0	0	0	0	0	0	0	0	0	0	0	0	0	0	0	0	0	0	0	0	0	0	0	0	0	0	0	0	0
ZNF641	0	0	0	0	0	0	0	1	0	0	0	0	0	0	0	0	0	0	0	0	0	0	0	0	0	0	0	0	0	0	0	0	0	0	0	0	0	0	0	0	0	0	0	0	0	0	0	0	0
MBD6	0	0	0	0	0	0	0	1	0	0	0	0	0	0	0	0	0	0	0	0	0	0	0	0	0	0	0	0	0	0	0	0	0	0	0	0	0	0	0	0	0	0	0	0	0	0	0	0	0
CAND1	0	0	0	0	0	0	0	1	0	0	0	0	0	0	0	0	0	0	0	0	0	0	0	0	0	0	0	0	0	0	1	0	0	0	0	0	0	0	0	0	0	0	0	0	0	0	0	0	0
DYRK2	0	0	0	0	0	0	0	1	0	0	0	0	0	0	0	0	0	0	0	0	0	0	0	0	0	0	0	0	0	0	0	0	0	0	0	0	0	0	0	0	0	0	0	0	0	0	0	0	0
STX2	0	0	0	0	0	0	0	1	0	0	0	0	0	0	0	0	0	0	0	0	0	0	0	0	0	0	0	0	0	0	0	0	0	0	0	0	0	0	0	0	0	0	0	0	0	0	0	0	0
RBM23	0	0	0	0	0	0	0	1	0	0	0	0	0	0	0	0	0	0	0	0	0	0	0	0	0	0	0	0	0	0	0	0	0	0	0	0	0	0	0	0	0	0	0	0	0	0	0	0	0
PKD1	0	0	0	0	0	0	0	1	0	0	0	0	0	0	0	0	0	0	0	0	0	0	0	0	0	0	0	0	0	0	0	0	0	0	0	0	0	0	0	0	0	0	0	0	0	0	0	0	0
CDH19	0	0	0	0	0	0	0	1	0	0	0	0	0	0	0	0	0	0	0	0	0	0	0	0	0	0	0	0	0	0	0	0	0	0	0	0	0	0	0	0	0	0	0	0	0	0	0	0	0
RINL	0	0	0	0	0	0	0	1	0	0	0	0	0	0	0	0	0	0	0	0	0	0	0	0	0	0	0	0	0	0	0	0	0	0	0	0	0	0	0	0	0	0	0	0	0	0	0	0	0
ZNF224	0	0	0	0	0	0	0	1	0	0	0	0	0	0	0	0	0	0	0	0	0	0	0	0	0	0	0	0	0	0	0	0	0	0	0	0	0	0	0	0	0	0	0	0	0	0	0	0	0
ZNF235	0	0	0	0	0	0	0	1	0	0	0	0	0	0	0	0	0	0	0	0	0	0	0	0	0	0	0	0	0	0	0	0	0	0	0	0	0	0	0	0	0	0	0	0	0	0	0	0	0
RALGAPA2	0	0	0	0	0	0	0	1	0	0	0	0	0	0	0	0	0	0	0	0	0	0	0	0	0	0	0	0	0	0	0	0	0	0	0	0	0	0	0	0	0	0	0	0	0	0	0	0	0
ADAMTS1	0	0	0	0	0	0	0	1	0	0	0	0	0	0	0	0	0	0	0	0	0	0	0	0	0	0	0	0	0	0	0	0	0	0	0	0	0	0	0	0	0	0	0	0	0	0	0	0	0
EWSR1	0	0	0	0	0	0	0	1	0	0	0	0	0	0	0	0	0	0	0	0	0	0	0	0	0	0	0	0	0	0	0	0	0	0	0	0	0	0	0	0	0	0	0	0	0	0	0	0	0
SYTL5	0	0	0	0	0	0	0	1	0	0	0	0	0	0	0	0	0	0	0	0	0	0	0	0	0	0	0	0	0	0	0	0	0	0	0	0	0	0	0	0	0	0	0	0	0	0	0	0	0
MED14	0	0	0	0	0	0	0	1	0	0	0	0	0	0	0	0	0	0	0	0	0	0	0	0	0	0	0	0	0	0	0	0	0	0	0	0	0	0	0	0	0	0	0	0	0	0	0	0	0
CNKSR1	0	0	0	0	0	0	0	0	1	0	0	0	0	0	0	0	0	0	0	0	0	0	0	0	0	0	0	0	0	0	0	0	0	0	0	0	0	0	0	0	0	0	0	0	0	0	0	0	0
DENND2D	0	0	0	0	0	0	0	0	1	0	0	0	0	0	0	0	0	0	0	0	0	0	0	0	0	0	0	0	1	0	0	0	0	0	0	0	0	0	0	0	0	0	0	0	0	0	0	0	0
WDR77	0	0	0	0	0	0	0	0	1	0	0	0	0	0	0	0	0	0	0	0	0	0	0	0	0	0	0	0	0	0	0	0	0	0	0	0	0	1	0	0	0	0	0	0	0	0	0	0	0
KIFAP3	0	0	0	0	0	0	0	0	1	0	0	0	0	0	0	0	0	0	0	0	0	0	0	0	0	0	0	0	0	0	0	0	0	0	0	0	0	0	0	0	0	0	0	0	0	0	0	0	0
CFHR2	0	0	0	0	0	0	0	0	1	0	0	0	0	0	0	0	0	0	0	0	0	0	0	0	0	0	0	0	0	0	0	0	0	0	0	0	0	0	0	0	0	0	0	0	0	0	0	0	0
IL19	0	0	0	0	0	0	0	0	1	0	0	0	0	0	0	0	0	0	0	0	0	0	0	0	0	0	0	0	0	0	0	0	0	0	0	0	0	0	0	0	0	0	0	0	0	0	0	0	0
CAPN9	0	0	0	0	0	0	0	0	1	0	0	0	0	0	0	0	0	0	0	0	0	0	0	0	0	1	0	0	0	0	0	0	0	0	0	0	0	0	0	0	0	0	0	0	0	0	0	0	0
DTNB	0	0	0	0	0	0	0	0	1	0	0	0	0	0	0	0	0	0	0	0	0	0	0	0	0	0	0	0	0	0	0	0	0	0	0	0	0	0	0	0	0	0	0	0	0	0	0	0	0
CIR1	0	0	0	0	0	0	0	0	1	0	0	0	0	0	0	0	0	0	0	0	0	0	0	0	0	0	0	0	0	0	0	0	0	0	0	0	0	0	0	0	0	0	0	0	0	0	0	0	0
CWH43	0	0	0	0	0	0	0	0	1	0	0	0	0	0	0	0	0	0	0	0	0	0	0	0	0	0	0	0	0	0	0	0	0	0	0	0	0	0	0	0	0	0	0	0	0	0	0	0	0
NPFFR2	0	0	0	0	0	0	0	0	1	0	0	0	0	0	0	0	0	0	0	0	0	0	0	0	0	0	0	0	0	0	0	0	0	0	0	0	0	0	0	0	0	0	0	0	0	0	0	0	0
MMRN1	0	0	0	0	0	0	0	0	1	0	0	0	0	0	0	0	0	0	0	0	1	0	0	0	0	0	0	0	0	0	0	0	0	0	0	0	0	0	0	0	0	0	0	1	0	0	0	0	0
MAML3	0	0	0	0	0	0	0	0	1	0	0	0	0	0	0	0	0	0	0	0	0	0	0	0	0	0	0	0	0	0	0	0	0	0	0	0	0	0	0	0	0	0	0	0	0	0	0	0	0
ADAMTS6	0	0	0	0	0	0	0	0	1	0	0	0	0	0	0	0	0	0	0	0	0	0	0	0	0	0	0	0	0	0	0	0	0	0	0	0	0	0	0	0	0	0	0	0	0	0	0	0	0
MAST4	0	0	0	0	0	0	0	0	1	0	0	0	0	0	0	0	0	0	0	0	0	0	0	0	0	0	1	0	0	0	0	0	0	0	0	0	0	0	0	0	0	0	0	0	0	0	1	0	0
GRM6	0	0	0	0	0	0	0	0	1	0	0	0	0	0	0	0	0	0	0	0	0	0	0	0	0	0	0	0	0	0	0	0	0	0	0	0	0	0	0	0	0	0	0	0	0	0	0	0	0
ITPR3	0	0	0	0	0	0	0	0	1	0	0	0	0	0	0	0	0	0	0	0	0	0	0	0	0	0	0	0	0	0	0	0	0	0	0	0	0	0	0	0	0	0	0	0	0	0	0	0	0
COL21A1	0	0	0	0	0	0	0	0	1	0	0	0	0	0	0	0	0	0	0	0	0	0	0	0	0	0	0	0	0	0	0	0	0	0	0	0	0	0	0	0	0	0	0	0	0	0	0	0	0
LAMA2	0	0	0	0	0	0	0	0	1	0	0	0	0	0	0	0	0	0	0	0	0	0	0	0	0	0	0	0	0	0	0	0	0	0	0	0	0	0	0	0	0	0	0	0	0	0	0	1	0
ZFPM2	0	0	0	0	0	0	0	0	1	0	0	0	0	0	0	0	0	0	0	0	0	0	0	0	0	0	0	0	0	0	0	0	0	0	0	0	0	0	0	0	0	0	0	0	0	0	0	0	0
ST3GAL1	0	0	0	0	0	0	0	0	1	0	0	0	0	0	0	0	0	0	0	0	0	0	0	0	0	0	0	0	0	0	0	0	0	0	0	0	0	0	0	0	0	0	0	0	0	0	0	0	0
OGN	0	0	0	0	0	0	0	0	1	0	0	0	0	0	0	0	0	0	0	0	0	0	0	0	0	0	0	0	0	0	0	0	0	0	0	0	0	0	0	0	0	0	0	0	0	0	0	0	0
MBL2	0	0	0	0	0	0	0	0	1	0	0	0	0	0	0	0	0	0	0	0	0	0	0	0	0	0	0	0	0	0	0	0	0	0	0	0	0	0	0	0	0	0	0	0	0	0	0	0	0
PCDH15	0	0	0	0	0	0	0	0	1	0	0	0	0	0	0	0	0	1	1	0	0	0	0	0	0	0	0	0	0	0	0	0	0	0	0	0	0	0	0	0	0	0	0	0	0	0	0	0	0
OR8D4	0	0	0	0	0	0	0	0	1	0	0	0	0	0	0	0	0	0	0	0	0	0	0	0	0	0	0	0	0	0	0	0	0	0	0	0	0	0	0	0	0	0	0	0	0	0	0	0	0
SPX	0	0	0	0	0	0	0	0	1	0	0	0	0	0	0	0	0	0	0	0	0	0	0	0	0	0	0	0	0	0	0	0	0	0	0	0	0	0	0	0	0	0	0	0	0	0	0	0	0
LRRC10	0	0	0	0	0	0	0	0	1	0	0	0	0	0	0	0	0	0	0	0	0	0	0	0	0	0	0	0	0	0	0	0	0	0	0	0	0	0	0	0	0	0	0	0	0	0	0	0	0
SART3	0	0	0	0	0	0	0	0	1	0	0	0	0	0	0	0	0	0	0	0	0	0	0	0	0	0	0	0	0	0	0	0	0	0	0	0	0	0	0	0	0	0	0	0	0	0	0	0	0
PARP4	0	0	0	0	0	0	0	0	1	0	0	0	0	0	0	0	1	0	0	0	0	0	0	0	0	0	0	0	0	0	0	0	0	0	0	0	0	0	0	0	0	0	0	0	0	0	0	0	0
HNRNPC	0	0	0	0	0	0	0	0	1	0	0	0	0	0	0	0	0	0	0	0	0	0	0	0	0	0	0	0	0	0	0	0	0	0	0	0	0	0	0	0	0	0	0	0	0	0	0	0	0
METTL3	0	0	0	0	0	0	0	0	1	0	0	0	0	0	0	0	0	0	0	0	0	0	0	0	0	0	0	0	0	0	0	0	0	0	0	0	0	0	0	0	0	0	0	0	0	0	0	0	0
PAK6	0	0	0	0	0	0	0	0	1	0	0	0	0	0	0	0	0	0	0	0	0	0	0	0	0	0	0	0	0	0	0	0	0	0	0	0	0	0	0	0	0	0	0	0	0	0	0	0	0
CCNF	0	0	0	0	0	0	0	0	1	0	0	0	0	0	0	0	0	0	0	0	0	0	0	0	0	0	0	0	0	0	0	0	0	0	0	0	0	0	0	0	0	0	0	0	0	0	0	0	0
ADCY9	0	0	0	0	0	0	0	0	1	0	0	0	0	0	0	0	0	0	0	0	0	0	0	0	0	1	0	0	0	0	0	0	0	0	0	0	0	0	0	0	0	0	0	0	0	0	0	0	0
SRCAP	0	0	0	0	0	0	0	0	1	0	0	0	0	0	0	0	0	0	0	0	0	0	0	0	0	0	0	0	0	0	0	0	0	0	0	0	0	0	0	0	0	0	0	0	0	0	0	0	0
CA7	0	0	0	0	0	0	0	0	1	0	0	0	0	0	0	0	0	0	0	0	0	0	0	0	0	0	0	0	0	0	0	0	0	0	0	0	0	0	0	0	0	0	0	0	0	0	0	0	0
AP1G1	0	0	0	0	0	0	0	0	1	0	0	0	0	0	0	0	0	0	0	0	0	0	0	0	0	0	0	0	0	0	0	0	0	0	0	0	0	0	0	0	0	0	0	0	0	0	0	0	0
SLC13A2	0	0	0	0	0	0	0	0	1	0	0	0	0	0	0	0	0	0	0	0	0	0	0	0	0	0	0	0	0	0	0	0	0	0	0	0	0	0	0	0	0	0	0	0	0	0	0	0	0
SUZ12	0	0	0	0	0	0	0	0	1	0	0	0	0	0	0	0	0	0	0	0	0	0	0	0	0	0	0	0	0	0	0	0	0	0	0	0	0	0	0	0	0	0	0	0	0	0	0	0	0
TMC8	0	0	0	0	0	0	0	0	1	0	0	0	0	0	0	0	0	0	0	0	0	0	0	0	0	0	0	0	0	0	0	0	0	0	0	0	0	0	0	0	0	0	0	0	0	0	0	0	0
RPTOR	0	0	0	0	0	0	0	0	1	0	0	0	0	0	0	0	0	0	0	0	0	0	0	0	0	0	0	0	0	0	0	0	0	0	0	0	0	0	0	0	0	0	0	0	0	0	0	0	0
MKKS	0	0	0	0	0	0	0	0	1	0	0	0	0	1	0	0	0	0	0	0	0	0	0	0	0	0	0	0	0	0	0	0	0	0	0	0	0	0	0	0	0	0	0	0	0	0	0	0	0
KIAA1210	0	0	0	0	0	0	0	0	1	0	0	0	0	0	0	0	0	0	0	0	0	0	0	0	0	0	0	0	0	0	0	0	0	0	0	0	0	0	0	0	0	0	0	0	0	0	0	0	0
SPEN	0	0	0	0	0	0	0	0	0	1	0	0	0	0	0	0	0	0	0	0	0	0	0	0	0	0	0	0	0	0	0	0	0	0	0	0	0	0	1	0	0	0	0	0	0	0	0	0	0
SNRNP40	0	0	0	0	0	0	0	0	0	1	0	0	0	0	0	0	0	0	0	0	0	0	0	0	0	0	0	0	0	0	0	0	0	0	0	0	0	0	0	0	0	0	0	0	0	0	0	0	0
PSMD4	0	0	0	0	0	0	0	0	0	1	0	0	0	0	0	0	0	0	0	0	0	0	0	0	0	0	0	0	0	0	0	0	0	0	0	0	0	0	0	0	0	0	0	0	0	0	0	0	0
FCRL4	0	0	0	0	0	0	0	0	0	1	0	0	0	0	0	0	0	0	0	0	0	0	0	0	0	0	0	0	0	0	0	0	0	0	0	0	0	0	0	0	0	0	0	0	0	0	0	0	0
UCK2	0	0	0	0	0	0	0	0	0	1	0	0	0	0	0	0	0	0	0	0	0	0	0	0	0	0	0	0	0	0	0	0	0	0	0	0	0	0	0	0	0	0	0	0	0	0	0	0	0
ILDR2	0	0	0	0	0	0	0	0	0	1	0	0	0	0	0	0	0	0	0	0	0	0	0	0	0	0	0	0	0	0	0	0	0	0	0	0	0	0	0	1	0	0	0	0	0	0	0	0	0
DHX9	0	0	0	0	0	0	0	0	0	1	0	0	0	0	0	0	0	0	0	0	0	0	0	0	0	0	0	0	0	0	0	0	0	0	0	0	0	0	0	0	0	0	0	0	0	0	0	0	0
PAPOLG	0	0	0	0	0	0	0	0	0	1	0	0	0	0	0	0	0	0	0	0	0	0	0	0	0	0	0	0	0	0	0	0	0	0	0	0	0	0	0	0	0	0	0	0	0	0	0	1	0
TMEM17	0	0	0	0	0	0	0	0	0	1	0	0	0	0	0	0	0	0	0	0	0	0	0	0	0	0	0	0	0	0	0	0	0	0	0	0	0	0	0	0	0	0	0	0	0	0	0	0	0
KCTD18	0	0	0	0	0	0	0	0	0	1	0	0	0	0	0	0	0	0	0	0	0	0	0	0	0	0	0	0	0	0	0	0	0	0	0	0	0	0	0	0	0	0	0	0	0	0	0	0	0
MED12L	0	0	0	0	0	0	0	0	0	1	0	0	0	0	0	0	0	0	0	0	0	0	0	0	0	0	0	0	0	0	0	1	0	0	0	0	0	0	0	0	0	0	0	0	0	0	0	0	0
AHSG	0	0	0	0	0	0	0	0	0	1	0	0	0	0	0	0	0	0	0	0	0	0	0	0	0	0	0	0	0	0	0	0	0	0	0	0	0	0	0	0	0	0	0	0	0	0	0	0	0
G3BP2	0	0	0	0	0	0	0	0	0	1	0	0	0	0	0	0	0	0	0	0	0	0	0	0	0	0	0	0	0	0	0	0	0	0	0	0	0	0	0	0	0	0	0	0	0	0	0	0	0
GZMK	0	0	0	0	0	0	0	0	0	1	0	0	0	0	0	0	0	0	0	0	0	0	0	0	0	0	0	0	0	0	0	0	0	0	0	0	0	0	0	0	0	0	0	0	0	0	0	0	0
RIPOR2	0	0	0	0	0	0	0	0	0	1	0	0	0	0	0	0	0	0	0	0	0	0	0	0	0	0	0	0	0	0	0	0	0	0	0	0	0	0	0	0	0	0	0	0	0	0	0	0	0
PKHD1	0	0	0	0	0	0	0	0	0	1	1	0	0	0	0	0	0	0	0	0	0	0	0	0	0	0	0	0	0	0	0	0	0	0	0	0	1	0	0	0	0	0	0	0	0	0	0	0	0
TTK	0	0	0	0	0	0	0	0	0	1	0	0	0	0	0	0	0	0	0	0	0	0	0	0	0	0	0	0	0	0	0	0	0	0	0	0	0	0	0	0	0	0	0	0	0	0	0	0	0
FAM162B	0	0	0	0	0	0	0	0	0	1	0	0	0	0	0	0	0	0	0	0	0	0	0	0	0	0	0	0	0	0	0	0	0	0	0	0	0	0	0	0	0	0	0	0	0	0	0	0	0
AKAP12	0	0	0	0	0	0	0	0	0	1	0	0	0	0	0	0	0	0	0	0	0	0	0	0	0	0	0	0	0	0	0	0	0	0	0	0	0	0	0	0	0	0	0	0	0	0	0	0	0
ARMT1	0	0	0	0	0	0	0	0	0	1	0	0	0	0	0	0	0	0	0	0	0	0	0	0	0	0	0	0	0	0	0	0	0	0	0	0	0	0	0	0	0	0	0	0	0	0	0	0	0
PLG	0	0	0	0	0	0	0	0	0	1	0	0	0	0	0	1	0	0	0	0	0	0	0	0	0	0	0	0	0	0	0	0	0	0	0	0	0	0	0	0	0	0	0	0	0	0	0	0	0
STK31	0	0	0	0	0	0	0	0	0	1	0	0	0	0	0	0	0	0	0	0	0	0	0	0	0	0	0	0	0	0	0	0	0	0	0	0	0	0	0	0	0	0	0	0	0	0	0	0	0
SFRP4	0	0	0	0	0	0	0	0	0	1	0	0	0	0	0	0	0	0	0	0	0	0	0	0	0	0	0	0	0	0	0	0	0	0	0	0	0	0	0	0	0	0	0	0	0	0	0	0	0
HECW1	0	0	0	0	0	0	0	0	0	1	0	0	0	0	0	0	0	0	0	0	0	0	0	0	0	0	0	0	0	1	0	0	0	0	0	0	0	0	0	0	0	0	0	0	0	0	0	0	0
NCAPG2	0	0	0	0	0	0	0	0	0	1	0	0	0	0	0	0	0	0	0	0	0	0	0	0	0	0	0	0	0	0	0	0	0	0	0	0	0	0	0	0	0	0	0	0	0	0	0	0	0
ELOC	0	0	0	0	0	0	0	0	0	1	0	0	0	0	0	0	0	0	0	0	1	0	0	0	0	0	0	0	0	0	0	0	0	0	0	0	0	0	0	0	0	0	0	0	0	0	0	0	0
ITIH5	0	0	0	0	0	0	0	0	0	1	0	0	0	0	0	0	0	0	0	0	0	0	0	0	0	0	0	0	0	0	0	0	0	0	0	0	0	0	0	0	0	0	0	0	0	0	0	0	0
PLCE1	0	0	0	0	0	0	0	0	0	1	0	0	0	0	0	0	0	0	0	0	0	0	0	0	0	0	0	0	0	0	0	0	0	0	0	0	0	0	0	0	0	0	0	0	1	0	0	0	0
OR5B12	0	0	0	0	0	0	0	0	0	1	0	0	0	0	0	0	0	0	0	0	0	0	0	0	0	0	0	0	0	0	0	0	0	0	0	0	0	0	0	0	0	0	0	0	0	0	0	0	0
AASDHPPT	0	0	0	0	0	0	0	0	0	1	0	0	0	0	0	0	0	0	0	0	0	0	0	0	0	0	0	0	0	0	0	0	0	0	0	0	0	0	0	0	0	0	0	0	0	0	0	0	0
KMT2A	0	0	0	0	0	0	0	0	0	1	0	0	0	0	0	0	0	0	0	0	0	0	0	0	0	0	0	0	0	0	0	0	0	0	0	0	0	0	0	0	0	0	0	0	0	0	0	0	0
PHLDB1	0	0	0	0	0	0	0	0	0	1	0	0	0	0	0	0	0	0	0	0	0	0	0	0	0	0	0	0	0	0	0	0	0	0	0	0	0	0	0	0	0	0	0	0	0	0	0	0	0
CDK2	0	0	0	0	0	0	0	0	0	1	0	0	0	0	0	0	1	0	0	0	0	0	0	0	0	0	0	0	0	0	0	0	0	0	0	0	0	0	0	0	0	0	0	0	0	0	0	0	0
YEATS4	0	0	0	0	0	0	0	0	0	1	0	0	0	0	0	0	0	0	0	0	0	0	0	0	0	0	0	0	0	0	0	0	0	0	0	0	0	0	0	0	0	0	0	0	0	0	0	0	0
ACAD10	0	0	0	0	0	0	0	0	0	1	0	0	0	0	0	0	0	0	0	0	0	0	0	0	0	0	0	0	0	0	0	0	0	0	0	0	0	0	0	0	0	0	0	0	0	0	0	0	0
HECTD4	0	0	0	0	0	0	0	0	0	1	0	0	0	0	0	0	0	0	0	0	0	0	0	0	0	0	0	0	0	0	0	0	0	0	0	0	0	0	0	0	0	0	0	0	0	0	0	0	0
HTR2A	0	0	0	0	0	0	0	0	0	1	0	0	0	0	0	0	0	0	0	0	0	0	0	0	0	0	0	0	0	0	0	0	0	0	0	0	0	0	0	0	0	0	0	0	0	0	0	0	0
MPP5	0	0	0	0	0	0	0	0	0	1	0	0	0	0	0	0	0	0	0	0	0	0	0	0	0	0	0	0	0	0	0	0	0	0	0	0	0	0	0	0	0	0	0	0	0	0	0	0	0
CCNK	0	0	0	0	0	0	0	0	0	1	0	0	0	0	0	0	0	0	0	0	0	0	0	0	0	0	0	0	0	0	0	0	0	0	0	0	0	0	0	0	0	0	0	0	0	0	0	0	0
ULK3	0	0	0	0	0	0	0	0	0	1	0	0	0	0	0	0	0	0	0	0	0	0	0	0	0	0	0	0	0	0	0	0	0	0	0	0	0	0	0	0	0	0	0	0	0	0	0	0	0
NR2F2	0	0	0	0	0	0	0	0	0	1	0	0	0	0	0	0	0	0	0	0	0	0	0	0	0	0	0	0	0	0	0	0	0	0	0	0	0	0	0	0	0	0	0	0	0	0	0	0	0
LINS1	0	0	0	0	0	0	0	0	0	1	0	0	0	0	0	0	0	0	0	0	0	0	0	0	0	0	0	0	0	0	0	0	0	0	0	0	0	0	0	0	1	0	0	0	0	0	0	0	0
ANKS4B	0	0	0	0	0	0	0	0	0	1	0	0	1	0	0	0	0	0	0	0	0	0	0	0	0	0	0	0	0	0	0	0	0	0	0	0	0	0	0	0	0	0	0	0	0	0	0	0	0
GAN	0	0	0	0	0	0	0	0	0	1	0	0	0	0	0	0	0	0	0	0	0	0	0	0	0	0	0	0	0	0	0	0	0	0	0	0	0	0	0	0	0	0	0	0	0	0	0	0	0
TP53	0	0	0	0	0	0	0	0	0	1	0	0	0	0	0	0	0	0	0	0	0	0	0	0	0	0	0	0	0	0	0	0	0	1	0	0	1	0	0	0	0	0	0	0	0	0	0	0	0
PIK3R6	0	0	0	0	0	0	0	0	0	1	0	0	0	0	0	0	0	0	0	0	0	0	0	0	0	0	0	0	0	0	0	0	0	0	0	0	0	0	0	0	0	0	0	0	0	0	0	0	0
MYH2	0	0	0	0	0	0	0	0	0	1	0	0	0	0	0	0	0	0	0	0	0	0	0	0	0	0	0	0	0	0	0	0	0	0	0	0	0	1	1	0	0	0	0	0	0	0	0	0	0
NT5M	0	0	0	0	0	0	0	0	0	1	0	0	0	0	0	0	0	0	0	0	0	0	0	0	0	0	0	0	0	0	0	0	0	0	0	0	0	0	0	0	0	0	0	0	0	0	0	0	0
TMEM106A	0	0	0	0	0	0	0	0	0	1	0	0	0	0	0	0	0	0	0	0	0	0	0	0	0	0	0	0	0	0	0	0	0	0	0	0	0	0	0	0	0	0	0	0	0	0	0	0	0
ABCC3	0	0	0	0	0	0	0	0	0	1	0	0	0	0	0	0	0	0	0	0	0	0	0	0	0	0	0	0	0	0	0	0	0	0	0	0	0	0	0	0	0	0	0	0	0	0	0	0	0
EIF4A3	0	0	0	0	0	0	0	0	0	1	0	0	0	0	0	0	0	0	0	0	0	0	0	0	0	0	0	0	0	0	0	0	0	0	0	0	0	0	0	0	0	0	0	0	0	0	0	0	0
NDC80	0	0	0	0	0	0	0	0	0	1	0	0	0	0	0	0	0	0	0	0	0	0	0	0	0	0	0	0	0	0	0	0	0	0	0	0	0	0	0	0	0	0	0	0	0	0	0	0	0
GRIK5	0	0	0	0	0	0	0	0	0	1	0	0	0	0	0	0	0	0	0	0	0	0	0	0	0	0	0	0	0	0	0	0	0	0	0	0	0	0	0	0	0	0	0	0	0	0	0	0	0
NAA20	0	0	0	0	0	0	0	0	0	1	0	0	0	0	0	0	0	0	0	0	0	0	0	0	0	0	0	0	0	0	0	0	0	0	0	0	0	0	0	0	0	0	0	0	0	0	0	0	0
CEP250	0	0	0	0	0	0	0	0	0	1	0	0	0	0	0	0	0	0	0	0	0	0	0	0	0	0	0	0	0	0	0	0	0	0	0	0	0	0	0	0	0	0	0	0	0	0	0	0	0
LSM14B	0	0	0	0	0	0	0	0	0	1	0	0	0	0	0	0	0	0	0	0	0	0	0	0	0	0	0	0	0	0	0	0	0	0	0	0	0	0	0	0	0	0	0	0	0	0	0	0	0
CFAP298-TCP10L	0	0	0	0	0	0	0	0	0	1	0	0	0	0	0	0	0	0	0	0	0	0	0	0	0	0	0	0	0	0	0	0	0	0	0	0	0	0	0	0	0	0	0	0	0	0	0	0	0
GGT1	0	0	0	0	0	0	0	0	0	1	0	0	0	0	0	0	0	0	0	0	0	0	0	0	0	0	0	0	0	0	0	0	0	0	0	0	0	0	0	0	0	0	0	0	0	0	0	0	0
REPS2	0	0	0	0	0	0	0	0	0	1	0	0	0	0	0	0	0	0	0	0	0	0	0	0	0	0	0	0	0	0	0	0	0	0	0	0	0	0	0	0	0	0	0	0	0	0	0	0	0
DIPK2B	0	0	0	0	0	0	0	0	0	1	0	0	0	0	0	0	0	0	0	0	0	0	0	0	0	0	0	0	0	0	0	0	0	0	0	0	0	0	0	0	0	0	0	0	0	0	0	0	0
NAP1L2	0	0	0	0	0	0	0	0	0	1	0	0	0	0	0	0	0	0	0	0	0	0	0	0	0	0	0	0	0	0	0	0	0	0	0	0	0	0	0	0	0	0	0	0	0	0	0	0	0
RLIM	0	0	0	0	0	0	0	0	0	1	0	0	0	0	0	0	0	0	0	0	0	0	0	0	0	0	0	0	0	0	0	0	0	0	0	0	0	0	0	0	0	0	0	0	0	0	0	0	0
ADGRG4	0	0	0	0	0	0	0	0	0	1	0	0	0	0	0	0	0	0	0	0	0	0	0	0	0	0	0	0	0	0	0	0	0	0	0	0	0	0	0	0	0	0	0	0	0	0	0	0	0
CLCNKB	0	0	0	0	0	0	0	0	0	0	1	0	0	0	0	0	0	0	0	0	0	0	0	0	0	0	0	0	0	0	0	0	0	0	0	0	0	0	0	0	0	0	0	0	0	0	0	0	0
ATP13A2	0	0	0	0	0	0	0	0	0	0	1	0	0	0	0	0	0	0	0	0	0	0	0	0	0	0	0	0	0	0	0	0	0	0	0	0	0	0	0	0	0	0	0	0	0	0	0	0	0
TRIM63	0	0	0	0	0	0	0	0	0	0	1	0	0	0	0	0	0	0	0	0	0	0	0	0	0	0	0	0	0	0	0	0	0	0	0	0	0	0	0	0	0	0	0	0	0	0	0	0	0
ATP2B4	0	0	0	0	0	0	0	0	0	0	1	0	0	0	0	0	0	0	0	0	0	0	0	0	0	0	0	0	0	0	0	0	0	0	0	0	0	0	0	0	0	0	0	0	0	0	0	0	0
XDH	0	0	0	0	0	0	0	0	0	0	1	0	0	0	0	0	0	0	0	0	0	0	0	0	0	0	0	0	0	0	0	0	0	0	0	0	0	0	0	0	0	0	0	0	0	0	0	0	0
VRK2	0	0	0	0	0	0	0	0	0	0	1	0	0	0	0	0	0	0	0	0	0	0	0	0	0	0	0	0	0	0	0	0	0	0	0	0	0	0	0	0	0	0	0	0	0	0	0	0	0
THSD7B	0	0	0	0	0	0	0	0	0	0	1	0	0	0	0	0	0	0	0	0	0	0	0	0	0	0	0	0	0	0	0	0	0	0	0	0	0	0	0	0	0	0	0	0	0	0	0	0	0
SLC25A36	0	0	0	0	0	0	0	0	0	0	1	0	0	0	0	0	0	0	0	0	0	0	0	0	0	0	0	0	0	0	0	0	0	0	0	0	0	0	0	0	0	0	0	0	0	0	0	0	0
HSD17B11	0	0	0	0	0	0	0	0	0	0	1	0	0	0	0	0	0	0	0	0	0	0	0	0	0	0	0	0	0	0	0	0	0	0	0	0	0	0	0	0	0	0	0	0	0	0	0	0	0
FAT1	0	0	0	0	0	0	0	0	0	0	1	0	0	0	0	0	0	0	0	0	0	0	0	1	0	0	0	0	0	0	0	0	0	0	0	0	0	0	0	0	0	0	0	0	0	0	0	0	0
ZNF608	0	0	0	0	0	0	0	0	0	0	1	0	0	0	0	0	0	0	0	0	0	0	0	0	0	0	0	0	0	0	0	0	0	1	0	0	0	0	0	0	0	0	0	0	0	0	0	0	0
PCDHB8	0	0	0	0	0	0	0	0	0	0	1	0	0	0	0	0	0	0	0	0	0	0	0	0	0	0	0	0	0	0	0	0	0	0	0	0	0	0	0	0	0	0	0	0	0	0	0	0	0
CDX1	0	0	0	0	0	0	0	0	0	0	1	0	0	0	0	0	0	0	0	0	0	0	0	0	0	0	0	0	0	0	0	0	0	0	0	0	0	0	0	0	0	0	0	0	0	0	0	0	0
ZNF184	0	0	0	0	0	0	0	0	0	0	1	0	0	0	0	0	0	0	0	0	0	0	0	0	0	0	0	0	0	0	0	0	0	0	0	0	0	0	0	0	0	0	0	0	0	0	0	0	0
CNR1	0	0	0	0	0	0	0	0	0	0	1	0	0	0	0	0	0	0	0	0	0	0	0	0	0	0	0	0	0	0	0	0	0	0	0	0	0	0	0	0	0	0	0	0	0	0	0	0	0
NKAIN2	0	0	0	0	0	0	0	0	0	0	1	0	0	0	0	0	0	0	0	0	0	0	0	0	0	0	0	0	0	0	0	0	0	0	0	0	0	0	0	0	0	0	0	0	0	0	0	0	0
AMPH	0	0	0	0	0	0	0	0	0	0	1	0	0	0	0	0	0	0	0	0	0	0	0	0	0	0	0	0	0	0	0	0	0	0	0	0	0	0	0	0	0	0	0	0	0	0	0	0	0
ADAM22	0	0	0	0	0	0	0	0	0	0	1	0	0	0	0	0	0	0	0	0	0	0	0	0	0	0	0	0	0	0	0	0	0	0	0	0	0	0	0	0	0	0	0	0	0	0	0	0	0
MTERF1	0	0	0	0	0	0	0	0	0	0	1	0	0	0	0	0	0	0	0	0	0	0	0	0	0	0	0	0	0	0	0	0	0	0	0	0	0	0	0	0	0	0	0	0	0	0	0	0	0
TAF1L	0	0	0	0	0	0	0	0	0	0	1	0	0	0	0	0	1	0	0	0	0	0	0	0	0	0	0	0	0	0	0	0	0	0	0	0	0	0	0	0	0	0	0	0	0	0	0	0	0
HNRNPK	0	0	0	0	0	0	0	0	0	0	1	0	0	0	0	0	0	0	0	0	0	0	0	0	0	0	0	0	0	0	0	0	0	0	0	0	0	0	0	0	0	0	0	0	0	0	0	0	0
PTPDC1	0	0	0	0	0	0	0	0	0	0	1	0	0	0	0	0	0	0	0	0	0	0	0	0	0	0	0	0	0	0	0	0	0	0	0	0	0	0	0	0	0	0	0	0	0	0	0	0	0
TSC1	0	0	0	0	0	0	0	0	0	0	1	0	0	0	0	0	0	0	0	0	0	0	0	0	0	0	0	0	0	0	0	0	0	0	0	0	0	0	0	0	0	0	0	0	0	0	0	0	0
KCNT1	0	0	0	0	0	0	0	0	0	0	1	0	0	1	0	0	0	0	0	0	0	0	0	0	0	0	0	0	0	0	0	0	0	0	0	0	0	0	0	0	0	0	0	0	0	0	0	0	0
FAM166A	0	0	0	0	0	0	0	0	0	0	1	0	0	0	0	0	0	0	0	0	0	0	0	0	0	0	0	0	0	0	0	0	0	0	0	0	0	0	0	0	0	0	0	0	0	0	0	0	0
ADARB2	0	0	0	0	0	0	0	0	0	0	1	0	0	0	0	0	0	0	0	0	0	0	0	0	0	0	0	0	0	0	0	0	0	0	0	0	0	0	0	0	0	0	0	0	0	0	0	0	0
PTEN	0	0	0	0	0	0	0	0	0	0	1	0	0	0	1	0	0	0	0	0	0	0	0	0	0	0	0	0	0	0	0	0	0	0	0	0	0	0	1	0	0	0	0	0	0	0	0	0	0
PPRC1	0	0	0	0	0	0	0	0	0	0	1	0	0	0	0	0	0	0	0	0	0	0	0	0	0	0	0	0	0	0	0	0	0	0	0	0	0	0	0	0	0	0	0	0	0	0	0	0	0
ZNF195	0	0	0	0	0	0	0	0	0	0	1	0	0	0	0	0	0	0	0	0	0	0	0	0	0	0	0	0	0	0	0	0	0	0	0	0	0	0	0	0	0	0	0	0	0	0	0	0	0
CAT	0	0	0	0	0	0	0	0	0	0	1	0	0	0	0	0	0	0	0	0	0	0	0	0	0	0	0	0	0	0	0	0	0	0	0	0	0	0	0	0	0	0	0	0	0	0	0	0	0
MAPK8IP1	0	0	0	0	0	0	0	0	0	0	1	0	0	0	0	0	0	0	0	0	0	0	0	0	0	0	0	0	0	0	0	0	0	0	0	0	0	0	0	0	0	0	0	0	0	0	0	0	0
CLCF1	0	0	0	0	0	0	0	0	0	0	1	0	0	0	0	0	0	0	0	0	0	0	0	0	0	0	0	0	0	0	0	0	0	0	0	0	0	0	0	0	0	0	0	0	0	0	0	0	0
DHCR7	0	0	0	0	0	0	0	0	0	0	1	0	0	0	0	0	0	0	0	0	0	0	0	0	0	0	0	0	0	0	0	0	0	0	0	0	0	0	0	0	0	0	0	0	0	0	0	0	0
PRDM10	0	0	0	0	0	0	0	0	0	0	1	0	0	0	0	0	1	0	0	0	0	0	0	0	0	0	0	0	0	0	0	0	0	0	0	0	0	0	0	0	0	0	0	0	0	0	0	0	0
ADAMTS8	0	0	0	0	0	0	0	0	0	0	1	0	0	0	0	0	0	0	0	0	0	0	0	0	0	0	0	0	0	0	0	0	0	0	0	0	0	0	0	0	0	0	0	0	0	0	0	0	0
RAD52	0	0	0	0	0	0	0	0	0	0	1	0	0	0	0	0	0	0	0	0	0	0	0	0	0	0	0	0	0	0	0	0	0	0	0	0	0	0	0	0	0	0	0	0	0	0	0	0	0
SLCO1B3	0	0	0	0	0	0	0	0	0	0	1	0	0	0	0	1	0	0	0	0	0	0	0	0	0	0	0	0	0	0	0	0	0	0	0	0	0	0	0	0	0	0	0	0	0	0	0	0	1
HSP90B1	0	0	0	0	0	0	0	0	0	0	1	0	0	0	0	0	0	0	0	0	0	0	0	1	0	0	0	0	0	0	0	0	0	0	0	0	0	0	0	0	0	0	0	0	0	0	0	0	0
USP12	0	0	0	0	0	0	0	0	0	0	1	0	0	0	0	0	0	0	0	0	0	0	0	0	0	0	0	0	0	0	0	0	0	0	0	0	0	0	0	0	0	0	0	0	0	0	0	0	0
CNMD	0	0	0	0	0	0	0	0	0	0	1	0	0	0	0	0	0	0	0	0	0	0	0	0	0	0	0	0	0	0	0	0	0	0	0	0	0	0	0	0	0	0	0	0	0	0	0	0	0
SCEL	0	0	0	0	0	0	0	0	0	0	1	0	0	0	0	0	0	0	0	0	0	0	0	0	0	0	0	0	0	0	0	0	0	0	0	0	0	0	0	0	0	0	0	0	0	0	0	0	0
SLITRK1	0	0	0	0	0	0	0	0	0	0	1	0	0	0	0	0	0	0	0	0	0	0	0	0	0	0	0	0	0	0	0	0	0	0	0	0	0	0	0	0	0	0	0	0	0	0	0	0	0
TINF2	0	0	0	0	0	0	0	0	0	0	1	0	0	0	0	0	0	0	0	0	0	0	0	0	0	0	0	0	0	0	0	0	0	0	0	0	0	0	0	0	0	0	0	0	0	0	0	0	0
MIS18BP1	0	0	0	0	0	0	0	0	0	0	1	0	0	0	0	0	0	0	0	0	0	0	0	0	0	0	0	0	0	0	0	0	0	0	0	0	0	0	0	0	0	0	0	0	0	0	0	0	0
PACS2	0	0	0	0	0	0	0	0	0	0	1	0	0	0	0	0	0	0	0	0	0	0	0	0	0	0	0	0	0	0	0	0	0	0	0	0	0	0	0	0	0	0	0	0	0	0	0	0	0
UBR1	0	0	0	0	0	0	0	0	0	0	1	0	0	0	0	0	0	0	0	0	0	0	0	0	0	0	0	0	0	0	0	0	0	0	0	0	0	0	0	0	0	0	0	0	0	0	0	0	0
PAQR5	0	0	0	0	0	0	0	0	0	0	1	0	0	0	0	0	0	0	0	0	0	0	0	0	0	0	0	0	0	0	0	0	0	0	0	0	0	0	0	0	0	0	0	0	0	0	0	0	0
THSD4	0	0	0	0	0	0	0	0	0	0	1	0	0	0	0	0	0	0	0	0	0	0	0	0	0	0	0	0	0	0	0	0	0	0	0	0	0	0	0	0	0	0	0	0	0	0	0	0	0
SLC28A1	0	0	0	0	0	0	0	0	0	0	1	0	0	0	0	0	0	0	0	0	0	0	0	0	0	0	0	0	0	0	0	0	0	0	0	0	0	0	0	0	0	0	0	0	0	0	0	0	0
PGAP6	0	0	0	0	0	0	0	0	0	0	1	0	0	0	0	0	0	0	0	0	0	0	0	0	0	0	0	0	0	0	0	0	0	0	0	0	0	0	0	0	0	0	0	0	0	0	0	0	0
CRAMP1	0	0	0	0	0	0	0	0	0	0	1	0	0	0	0	0	0	0	0	0	0	0	0	0	0	0	0	0	0	0	0	0	0	0	0	0	0	0	0	0	0	0	0	0	0	0	0	0	0
TRAF7	0	0	0	0	0	0	0	0	0	0	1	0	0	0	0	0	0	0	0	0	0	0	0	0	0	0	0	0	0	0	0	0	0	0	0	0	0	0	0	0	0	0	0	0	0	0	0	0	0
SLX4	0	0	0	0	0	0	0	0	0	0	1	0	0	0	0	0	0	0	0	0	0	0	0	0	0	0	0	0	0	0	0	0	0	0	0	0	0	0	0	0	0	0	0	0	0	0	0	0	0
CREBBP	0	0	0	0	0	0	0	0	0	0	1	0	0	0	0	0	0	0	0	0	0	0	0	0	0	0	0	0	0	0	0	0	0	0	0	0	0	0	0	0	0	0	0	0	0	0	0	0	0
ZDHHC1	0	0	0	0	0	0	0	0	0	0	1	0	0	0	0	0	0	0	0	0	0	0	0	0	0	0	0	0	0	0	0	0	0	0	0	0	0	0	0	0	0	0	0	0	0	0	0	0	0
CLEC18B	0	0	0	0	0	0	0	0	0	0	1	0	0	0	0	0	0	0	0	0	0	0	0	0	0	0	0	0	0	0	0	0	0	0	0	0	0	0	0	0	0	0	0	0	0	0	0	0	0
DNAH9	0	0	0	0	0	0	0	0	0	0	1	0	0	0	0	0	0	0	0	0	0	0	0	0	0	0	0	0	0	0	0	0	0	0	0	0	0	0	0	0	0	0	0	0	0	0	0	0	0
C17orf75	0	0	0	0	0	0	0	0	0	0	1	0	0	0	0	0	0	0	0	0	0	0	0	0	0	0	0	0	0	0	0	0	0	0	0	0	0	0	0	0	0	0	0	0	0	0	0	0	0
BRIP1	0	0	0	0	0	0	0	0	0	0	1	0	0	0	0	0	0	0	0	0	0	0	0	0	0	0	0	0	0	0	0	0	0	0	0	0	0	0	0	0	0	0	0	0	0	0	0	0	0
BPTF	0	0	0	0	0	0	0	0	0	0	1	0	0	0	0	0	0	0	0	0	0	0	0	0	0	0	0	0	0	0	0	0	0	0	0	0	0	0	0	0	0	0	0	0	0	0	0	0	0
ABCA5	0	0	0	0	0	0	0	0	0	0	1	0	0	0	0	0	0	0	0	0	0	0	0	0	0	0	0	0	0	0	0	0	0	0	0	0	0	0	0	0	0	0	0	0	0	0	0	0	0
GALK1	0	0	0	0	0	0	0	0	0	0	1	0	0	0	0	0	0	0	0	0	0	0	0	0	0	0	0	0	0	0	0	0	0	0	0	0	0	0	0	0	0	0	0	0	0	0	0	0	0
XAB2	0	0	0	0	0	0	0	0	0	0	1	0	0	0	0	0	0	0	0	0	0	0	0	0	0	0	0	0	0	0	0	0	0	0	0	0	0	0	0	0	0	0	0	0	0	0	0	0	0
ZNF816	0	0	0	0	0	0	0	0	0	0	1	0	0	0	0	0	0	0	0	0	0	0	0	0	0	0	0	0	0	0	0	0	0	0	0	0	0	0	0	0	0	0	0	0	0	0	0	1	0
LILRA6	0	0	0	0	0	0	0	0	0	0	1	0	0	0	0	0	0	0	0	0	0	0	0	0	0	0	0	0	0	0	0	0	0	0	0	0	0	0	0	0	0	0	0	0	0	0	0	0	0
ACSS2	0	0	0	0	0	0	0	0	0	0	1	0	0	0	0	0	0	0	0	0	0	0	0	0	0	0	0	0	0	0	0	0	0	0	0	0	0	0	0	0	0	0	0	0	0	0	0	0	0
ACTR5	0	0	0	0	0	0	0	0	0	0	1	0	0	0	0	0	0	0	0	0	0	0	0	0	0	0	0	0	0	0	0	0	0	0	0	0	0	0	0	0	0	0	0	0	0	0	0	0	0
DHX35	0	0	0	0	0	0	0	0	0	0	1	0	0	0	0	0	0	0	0	0	0	0	0	0	0	0	0	0	0	0	0	0	0	0	0	0	0	0	0	0	0	0	0	0	0	0	0	0	0
SYNJ1	0	0	0	0	0	0	0	0	0	0	1	0	0	0	0	0	0	0	0	0	0	0	0	0	0	0	0	0	0	0	0	0	0	0	0	0	0	0	0	0	0	0	0	0	0	0	0	0	0
PCNT	0	0	0	0	0	0	0	0	0	0	1	0	0	0	0	0	0	0	0	0	0	0	0	0	0	0	0	0	0	0	0	0	0	0	0	0	0	0	0	0	0	0	0	0	0	0	0	0	0
HUWE1	0	0	0	0	0	0	0	0	0	0	1	0	0	0	0	0	0	0	0	0	0	0	0	0	0	0	0	0	0	0	0	0	0	0	0	0	0	0	0	0	0	0	0	0	0	0	0	0	0
MAGEA10	0	0	0	0	0	0	0	0	0	0	1	0	0	0	0	0	0	0	0	0	0	0	0	0	0	0	0	0	0	0	0	0	0	0	0	0	0	0	0	0	0	0	0	0	0	0	0	0	0
SNRNP200	0	0	0	0	0	0	0	0	0	0	0	1	0	0	0	0	0	0	0	0	0	0	0	0	0	0	0	0	0	0	0	0	0	0	0	0	0	0	0	0	0	0	0	0	0	0	0	0	0
CAMK2D	0	0	0	0	0	0	0	0	0	0	0	1	0	0	0	0	0	0	0	0	0	0	0	0	0	0	0	0	0	0	0	0	0	0	0	0	0	0	0	0	0	0	0	0	0	0	0	0	0
SMPD2	0	0	0	0	0	0	0	0	0	0	0	1	0	0	0	0	0	0	0	0	0	0	0	0	0	0	0	0	0	0	0	0	0	0	0	0	0	0	0	0	0	0	0	0	0	0	0	0	0
CTNNAL1	0	0	0	0	0	0	0	0	0	0	0	1	0	0	0	0	0	0	0	0	0	0	0	0	0	0	0	0	0	0	0	0	0	0	0	0	0	0	0	0	0	0	0	0	0	0	0	0	0
NOTCH1	0	0	0	0	0	0	0	0	0	0	0	1	0	0	0	0	0	0	0	0	0	0	0	0	0	0	0	0	0	0	0	0	0	0	0	0	0	0	0	1	0	0	0	0	0	0	0	0	0
MYOF	0	0	0	0	0	0	0	0	0	0	0	1	0	0	0	0	0	0	0	0	0	0	0	0	0	0	0	0	0	0	0	0	0	0	0	0	0	0	0	0	0	0	0	0	0	0	0	0	0
SLC22A25	0	0	0	0	0	0	0	0	0	0	0	1	0	0	0	0	0	0	0	0	0	0	0	0	0	0	0	0	0	0	0	0	0	0	0	0	0	0	0	0	0	0	0	0	0	0	0	0	1
DYNC2H1	0	0	0	0	0	0	0	0	0	0	0	1	0	1	0	0	0	0	0	0	0	0	0	0	0	0	0	0	0	0	0	0	0	0	0	0	0	0	0	0	0	0	0	0	0	0	0	0	0
SYNE3	0	0	0	0	0	0	0	0	0	0	0	1	0	0	0	0	0	0	0	0	0	0	0	0	0	0	0	0	0	0	0	0	0	0	0	0	0	0	0	0	0	0	0	0	0	0	0	0	0
TRIOBP	0	0	0	0	0	0	0	0	0	0	0	1	0	0	0	0	0	0	0	0	0	0	0	0	0	0	0	0	0	0	0	0	0	0	0	0	0	0	0	0	0	0	0	0	0	0	0	0	0
DNTTIP2	0	0	0	0	0	0	0	0	0	0	0	0	1	0	0	0	0	0	0	0	0	0	0	0	0	0	0	0	0	0	0	0	1	0	0	0	0	0	0	0	0	0	0	0	0	0	0	0	0
RALGPS2	0	0	0	0	0	0	0	0	0	0	0	0	1	0	0	0	0	0	0	0	0	0	0	0	0	0	0	0	0	0	0	0	0	0	0	0	0	0	0	0	0	0	0	0	0	0	0	0	0
SCCPDH	0	0	0	0	0	0	0	0	0	0	0	0	1	0	0	0	0	0	0	0	0	0	0	0	0	0	0	0	0	0	0	0	0	0	0	0	0	0	0	0	0	0	0	0	0	0	0	0	0
USP34	0	0	0	0	0	0	0	0	0	0	0	0	1	0	0	0	0	0	0	0	0	0	0	0	0	0	0	0	0	0	0	0	0	0	0	0	0	0	0	0	0	0	0	0	0	0	0	0	0
LCT	0	0	0	0	0	0	0	0	0	0	0	0	1	0	0	0	0	0	0	0	0	0	0	0	0	0	0	0	0	0	0	0	0	0	0	0	0	0	0	0	0	0	0	0	0	0	0	0	0
LRP2	0	0	0	0	0	0	0	0	0	0	0	0	1	0	0	0	0	0	0	0	0	0	0	0	0	0	0	0	0	0	0	0	0	0	0	0	0	0	0	0	0	0	0	0	0	0	0	0	0
CNTN6	0	0	0	0	0	0	0	0	0	0	0	0	1	0	0	0	0	0	0	0	0	0	0	0	0	0	0	0	0	0	0	0	0	0	0	0	0	0	0	0	0	0	0	0	0	0	0	0	0
CRELD1	0	0	0	0	0	0	0	0	0	0	0	0	1	0	0	0	0	0	0	0	0	0	0	0	0	0	0	0	0	0	0	0	0	0	0	0	0	0	0	0	0	0	0	0	0	0	0	0	0
ATP13A4	0	0	0	0	0	0	0	0	0	0	0	0	1	0	0	0	0	0	0	0	0	0	0	0	0	0	0	0	0	0	0	0	0	0	0	0	0	0	0	0	0	0	0	0	0	0	0	0	0
BOD1L1	0	0	0	0	0	0	0	0	0	0	0	0	1	0	0	0	0	0	0	0	0	0	0	0	0	0	0	0	0	0	0	0	0	0	0	0	0	0	0	0	0	0	0	0	0	0	0	0	0
GABRB1	0	0	0	0	0	0	0	0	0	0	0	0	1	0	0	0	0	0	0	0	0	0	0	0	0	0	0	0	0	0	0	0	0	0	0	0	0	0	0	0	0	0	0	0	0	0	0	0	0
MFSD8	0	0	0	0	0	0	0	0	0	0	0	0	1	0	0	0	0	0	0	0	0	0	0	0	0	0	0	0	0	0	0	0	0	0	0	0	0	0	0	0	0	0	0	0	0	0	0	0	0
PCDH10	0	0	0	0	0	0	0	0	0	0	0	0	1	0	0	0	0	0	0	0	0	0	0	0	0	0	0	0	0	0	0	0	0	0	0	0	0	0	0	0	0	0	0	0	0	0	0	0	0
TKTL2	0	0	0	0	0	0	0	0	0	0	0	0	1	0	0	0	0	0	0	0	0	0	0	0	0	0	0	0	0	0	0	0	0	1	0	0	0	0	0	0	1	0	0	0	0	0	0	0	0
ST8SIA4	0	0	0	0	0	0	0	0	0	0	0	0	1	0	0	0	0	0	0	0	0	0	0	0	0	0	0	0	0	0	0	0	0	0	0	0	0	0	0	0	0	0	0	0	0	0	0	0	0
UBTD2	0	0	0	0	0	0	0	0	0	0	0	0	1	0	0	0	0	0	0	0	0	0	0	0	0	0	0	0	0	0	0	0	0	0	0	0	0	0	0	0	0	0	0	0	0	0	0	0	0
ATXN1	0	0	0	0	0	0	0	0	0	0	0	0	1	0	0	0	0	0	0	0	0	0	0	0	0	0	0	0	0	0	0	0	0	0	0	0	0	0	0	0	0	0	0	0	0	0	0	0	0
MANEA	0	0	0	0	0	0	0	0	0	0	0	0	1	0	0	0	0	0	0	0	0	0	0	0	0	0	0	0	0	0	0	0	0	0	0	0	0	0	0	0	0	0	0	0	0	0	0	0	0
SPATA31D1	0	0	0	0	0	0	0	0	0	0	0	0	1	0	0	0	0	0	0	0	0	0	0	0	0	0	0	0	0	0	0	0	0	0	0	0	0	0	0	0	0	0	0	0	0	0	0	0	0
RGS3	0	0	0	0	0	0	0	0	0	0	0	0	1	1	0	0	0	0	0	0	0	0	0	0	0	0	0	0	0	0	0	0	0	0	0	0	0	0	0	0	0	0	0	0	0	0	0	0	0
NUP214	0	0	0	0	0	0	0	0	0	0	0	0	1	0	0	0	0	0	0	0	0	0	0	0	0	0	0	0	0	0	0	0	0	0	0	0	0	0	0	0	1	0	0	0	0	0	0	0	0
SLK	0	0	0	0	0	0	0	0	0	0	0	0	1	0	0	0	0	0	0	0	0	0	0	0	0	0	0	0	0	0	0	0	0	0	0	0	0	0	0	0	0	0	0	0	0	0	0	0	0
TRIM6	0	0	0	0	0	0	0	0	0	0	0	0	1	0	0	0	0	0	0	0	0	0	0	0	0	0	0	0	0	0	0	0	0	0	0	0	0	0	0	0	0	0	0	0	0	0	0	0	0
ATM	0	0	0	0	0	0	0	0	0	0	0	0	1	0	0	0	0	0	0	0	0	0	0	0	0	0	0	0	0	0	0	0	0	0	0	0	0	0	0	0	0	0	0	0	0	0	0	0	0
GPRC5D	0	0	0	0	0	0	0	0	0	0	0	0	1	0	0	0	0	0	0	0	0	0	0	0	0	0	0	0	0	0	0	0	0	0	0	0	0	0	0	0	0	0	0	0	0	0	0	0	0
GLS2	0	0	0	0	0	0	0	0	0	0	0	0	1	0	0	0	0	0	0	0	0	0	0	0	0	0	0	0	0	0	0	0	0	0	0	0	0	0	0	0	0	0	0	0	0	0	0	0	0
GCN1	0	0	0	0	0	0	0	0	0	0	0	0	1	0	0	0	0	0	0	0	0	0	0	0	0	0	0	0	0	0	0	0	0	0	0	0	0	0	0	0	0	0	0	0	0	0	0	0	0
OBI1	0	0	0	0	0	0	0	0	0	0	0	0	1	0	0	0	0	0	0	0	0	0	0	0	0	0	0	0	0	0	0	0	0	0	0	0	0	0	0	0	0	0	0	0	0	0	0	0	0
ACIN1	0	0	0	0	0	0	0	0	0	0	0	0	1	0	0	0	0	0	0	0	0	0	0	0	0	0	0	0	0	0	0	0	0	0	0	0	0	0	0	0	0	0	0	0	0	0	0	0	0
EIF5	0	0	0	0	0	0	0	0	0	0	0	0	1	0	0	0	0	0	0	0	0	0	0	0	0	0	0	0	0	0	0	0	0	0	0	0	0	0	0	0	0	0	0	0	0	0	0	0	0
AHNAK2	0	0	0	0	0	0	0	0	0	0	0	0	1	0	0	0	0	0	0	0	0	0	0	0	0	0	0	0	0	0	0	0	0	0	0	0	0	0	0	0	0	0	0	0	0	0	0	0	0
XYLT2	0	0	0	0	0	0	0	0	0	0	0	0	1	0	0	0	0	0	0	0	0	0	0	0	0	0	0	0	0	0	0	0	0	0	0	0	0	0	0	0	0	0	0	0	0	0	0	0	0
CTDP1	0	0	0	0	0	0	0	0	0	0	0	0	1	0	0	0	0	0	0	1	0	0	0	0	0	0	0	0	0	0	0	0	0	0	0	0	0	0	0	0	0	0	0	0	0	0	0	0	0
ZNF136	0	0	0	0	0	0	0	0	0	0	0	0	1	0	0	0	0	0	0	0	0	0	0	0	0	0	0	0	0	0	0	0	0	0	0	0	0	0	0	0	0	0	0	0	0	0	0	0	0
ZNF44	0	0	0	0	0	0	0	0	0	0	0	0	1	0	0	0	0	0	0	0	0	0	0	0	0	0	0	0	0	0	0	0	0	0	0	0	0	0	0	0	0	0	0	0	0	0	0	0	0
APMAP	0	0	0	0	0	0	0	0	0	0	0	0	1	0	0	0	0	0	0	0	0	0	0	0	0	0	0	0	0	0	0	0	0	0	0	0	0	0	0	0	0	0	0	0	0	0	0	0	0
MAB21L3	0	0	0	0	0	0	0	0	0	0	0	0	0	1	0	0	0	0	0	0	0	0	0	0	0	0	0	0	0	0	0	0	0	0	0	0	0	0	0	0	0	0	0	0	0	0	0	0	0
UBQLN4	0	0	0	0	0	0	0	0	0	0	0	0	0	1	0	0	0	0	0	0	0	0	0	0	0	0	0	0	0	0	0	0	0	0	0	0	0	0	0	0	0	0	0	0	0	0	0	0	0
OR6N1	0	0	0	0	0	0	0	0	0	0	0	0	0	1	0	0	0	0	0	0	0	0	0	0	0	0	0	0	0	0	0	0	0	0	0	0	0	0	0	0	0	0	0	0	0	0	1	0	0
AHCTF1	0	0	0	0	0	0	0	0	0	0	0	0	0	1	0	0	0	0	0	0	0	0	0	0	0	0	0	0	0	0	0	0	0	0	0	0	0	0	0	0	0	0	0	0	0	0	0	0	0
ARHGAP25	0	0	0	0	0	0	0	0	0	0	0	0	0	1	0	0	0	0	0	0	0	0	0	0	0	0	0	0	0	0	0	0	0	0	0	0	0	0	0	0	0	0	0	0	0	1	0	0	0
COL3A1	0	0	0	0	0	0	0	0	0	0	0	0	0	1	0	0	0	0	0	0	0	0	0	0	0	0	0	0	0	0	0	0	0	0	0	0	0	0	0	0	0	0	0	0	0	0	0	0	0
SNED1	0	0	0	0	0	0	0	0	0	0	0	0	0	1	0	0	1	0	0	0	0	0	0	0	0	0	0	0	0	0	0	0	0	0	0	0	0	0	0	0	0	0	0	0	0	0	0	0	0
GLYCTK	0	0	0	0	0	0	0	0	0	0	0	0	0	1	0	0	0	0	0	0	0	0	0	0	0	0	0	0	0	0	0	0	0	0	0	0	0	0	0	0	0	0	0	0	0	0	0	0	0
IFT57	0	0	0	0	0	0	0	0	0	0	0	0	0	1	0	0	0	0	0	0	0	0	0	0	0	0	0	0	0	0	0	0	0	0	0	0	0	0	0	0	0	0	0	0	0	0	0	0	0
ADGRL3	0	0	0	0	0	0	0	0	0	0	0	0	0	1	0	0	0	0	0	0	0	0	0	0	0	0	0	0	0	0	0	0	0	0	0	0	0	0	0	0	0	0	0	0	0	0	0	0	0
ETFDH	0	0	0	0	0	0	0	0	0	0	0	0	0	1	0	0	0	0	0	0	0	0	0	0	0	0	0	0	0	0	0	0	0	0	0	0	0	0	0	0	0	0	0	0	0	0	0	0	0
TARS1	0	0	0	0	0	0	0	0	0	0	0	0	0	1	0	0	0	0	0	0	0	0	0	0	0	0	0	0	0	0	0	0	0	0	0	0	0	0	0	0	0	0	0	0	0	0	0	0	0
HMGCS1	0	0	0	0	0	0	0	0	0	0	0	0	0	1	0	0	0	0	0	0	0	0	0	0	0	0	0	0	0	0	0	0	0	0	0	0	0	0	0	0	0	0	0	0	0	0	0	0	0
SH3TC2	0	0	0	0	0	0	0	0	0	0	0	0	0	1	0	0	0	0	0	0	0	0	0	0	0	0	0	0	0	0	0	0	0	0	0	0	0	0	0	0	0	0	0	0	0	0	0	0	0
HK3	0	0	0	0	0	0	0	0	0	0	0	0	0	1	0	0	0	0	0	0	0	0	0	0	0	0	0	0	0	0	0	0	0	0	0	0	0	0	0	0	0	0	0	0	0	0	0	0	0
DST	0	0	0	0	0	0	0	0	0	0	0	0	0	1	0	0	0	0	0	0	0	0	0	0	0	0	0	0	0	0	0	0	0	0	0	0	0	0	0	0	0	0	0	1	0	0	0	0	0
TMEM130	0	0	0	0	0	0	0	0	0	0	0	0	0	1	0	0	0	0	0	0	0	0	0	0	0	0	0	0	0	0	0	0	0	0	0	0	0	0	0	0	0	0	0	0	0	0	0	0	0
PRSS55	0	0	0	0	0	0	0	0	0	0	0	0	0	1	0	0	0	0	0	0	0	0	0	0	0	0	0	0	0	0	0	0	0	0	0	0	0	0	0	0	0	0	0	0	0	0	0	0	0
STK3	0	0	0	0	0	0	0	0	0	0	0	0	0	1	0	0	0	0	0	0	0	0	0	0	0	0	0	0	0	0	0	0	0	0	0	0	0	0	0	0	0	0	0	0	0	0	0	0	0
GPT	0	0	0	0	0	0	0	0	0	0	0	0	0	1	0	0	0	0	0	0	0	0	0	0	0	0	0	0	0	0	0	0	0	0	0	0	0	0	0	0	0	0	0	0	0	0	0	0	0
CCAR1	0	0	0	0	0	0	0	0	0	0	0	0	0	1	0	0	0	0	0	0	0	0	0	0	0	0	0	0	0	0	0	0	0	0	0	0	0	0	0	0	0	0	0	0	0	0	0	0	0
SBF2	0	0	0	0	0	0	0	0	0	0	0	0	0	1	0	0	0	0	0	0	1	0	0	0	0	0	0	0	0	0	0	0	0	0	0	0	0	0	0	0	0	0	0	0	0	0	0	0	0
OR4C11	0	0	0	0	0	0	0	0	0	0	0	0	0	1	0	0	0	0	0	0	0	0	0	0	0	0	0	0	0	0	0	0	0	0	0	0	0	0	0	0	0	0	0	0	0	0	0	0	0
RTN3	0	0	0	0	0	0	0	0	0	0	0	0	0	1	0	0	0	0	0	0	0	0	0	0	0	0	0	0	0	0	0	0	0	0	0	0	0	0	0	0	0	0	0	0	0	0	0	0	0
SNX19	0	0	0	0	0	0	0	0	0	0	0	0	0	1	0	0	0	0	0	0	0	0	0	0	0	0	0	0	0	0	0	0	0	0	0	0	0	0	0	0	0	0	0	0	0	0	0	0	0
USP5	0	0	0	0	0	0	0	0	0	0	0	0	0	1	0	0	0	0	0	0	0	0	0	0	0	0	0	0	0	0	0	0	0	0	0	0	0	0	0	0	0	0	0	0	0	0	0	0	0
TAOK3	0	0	0	0	0	0	0	0	0	0	0	0	0	1	0	0	0	0	0	0	0	0	0	0	0	0	0	0	0	0	0	0	0	0	0	0	0	0	0	0	0	0	0	0	0	0	0	0	0
MTUS2	0	0	0	0	0	0	0	0	0	0	0	0	0	1	0	0	0	0	0	0	0	0	0	0	0	0	0	0	0	0	0	0	0	0	0	0	0	0	0	0	0	0	0	0	0	0	0	0	0
UBAC2	0	0	0	0	0	0	0	0	0	0	0	0	0	1	0	0	0	0	0	0	0	0	0	0	0	0	0	0	0	0	0	0	0	0	0	0	0	0	0	0	0	0	0	0	0	0	0	0	0
THBS1	0	0	0	0	0	0	0	0	0	0	0	0	0	1	0	0	0	0	0	0	0	0	0	0	0	1	0	0	0	0	0	0	0	0	0	0	0	0	0	0	1	0	0	0	0	0	0	0	0
NUSAP1	0	0	0	0	0	0	0	0	0	0	0	0	0	1	0	0	0	0	0	0	0	0	0	0	0	0	0	0	0	0	0	0	0	0	0	0	0	0	0	0	0	0	0	0	0	0	0	0	0
MAP1A	0	0	0	0	0	0	0	0	0	0	0	0	0	1	0	0	0	0	0	0	0	0	0	0	0	0	0	0	1	0	0	0	0	0	0	0	0	0	0	0	0	0	0	0	0	0	0	0	0
UNC13C	0	0	0	0	0	0	0	0	0	0	0	0	0	1	0	0	0	0	0	0	0	0	0	0	0	0	0	0	0	0	0	0	0	0	0	0	0	0	0	0	0	0	0	0	0	0	0	0	0
IDH3A	0	0	0	0	0	0	0	0	0	0	0	0	0	1	0	0	0	0	0	0	0	0	0	0	0	0	0	0	0	0	0	0	0	0	0	0	0	0	0	0	0	0	0	0	0	0	0	0	0
SCNN1B	0	0	0	0	0	0	0	0	0	0	0	0	0	1	0	0	0	0	0	0	0	0	0	0	0	0	0	0	0	0	0	0	0	0	0	0	0	0	0	0	0	0	0	0	0	0	0	0	0
PRMT7	0	0	0	0	0	0	0	0	0	0	0	0	0	1	0	0	0	0	0	0	0	0	0	0	0	0	0	0	0	0	0	0	0	0	0	0	0	0	0	0	0	0	0	0	0	0	0	0	0
SF3B3	0	0	0	0	0	0	0	0	0	0	0	0	0	1	0	0	0	0	0	0	0	0	0	0	0	0	0	0	0	0	0	0	0	0	0	0	0	0	0	0	0	0	0	0	0	0	0	0	1
MINK1	0	0	0	0	0	0	0	0	0	0	0	0	0	1	0	0	0	0	0	0	0	0	0	0	0	0	0	0	0	0	0	0	0	0	0	0	0	0	0	0	0	0	0	0	0	0	0	0	0
BCAS3	0	0	0	0	0	0	0	0	0	0	0	0	0	1	0	0	0	0	0	0	0	0	0	0	0	0	0	0	0	0	0	0	0	0	0	0	0	0	0	0	0	0	0	0	0	0	0	0	0
CBX2	0	0	0	0	0	0	0	0	0	0	0	0	0	1	0	0	0	0	0	0	0	0	0	0	0	0	0	0	0	0	0	0	0	0	0	0	0	0	0	0	0	0	0	0	0	0	0	0	0
STAP2	0	0	0	0	0	0	0	0	0	0	0	0	0	1	0	0	0	0	0	0	0	0	0	0	0	0	0	0	0	0	0	0	0	0	0	0	0	0	0	0	0	0	0	0	0	0	0	0	0
CATSPERD	0	0	0	0	0	0	0	0	0	0	0	0	0	1	0	0	0	0	0	0	0	0	0	0	0	0	0	0	0	0	0	0	0	0	0	0	0	0	0	0	0	0	0	0	0	0	0	0	0
DDX39A	0	0	0	0	0	0	0	0	0	0	0	0	0	1	0	0	0	0	0	0	0	0	0	0	0	0	0	0	0	0	0	0	0	0	0	0	0	0	0	0	0	0	0	0	0	0	0	0	0
PDCD5	0	0	0	0	0	0	0	0	0	0	0	0	0	1	0	0	0	0	0	0	0	0	0	0	0	0	0	0	0	0	0	0	0	0	0	0	0	0	0	0	0	0	0	0	0	0	0	0	0
SUN5	0	0	0	0	0	0	0	0	0	0	0	0	0	1	0	0	0	0	0	0	0	0	0	0	0	0	0	0	0	0	0	0	0	0	0	0	0	0	0	0	0	0	0	0	0	0	0	0	0
TPD52L2	0	0	0	0	0	0	0	0	0	0	0	0	0	1	0	0	0	0	0	0	0	0	0	0	0	0	0	0	0	0	0	0	0	0	0	0	0	0	0	0	0	0	0	0	0	0	0	0	0
COL6A2	0	0	0	0	0	0	0	0	0	0	0	0	0	1	0	0	0	0	0	0	0	0	0	0	0	0	0	0	0	0	0	1	0	0	0	0	0	0	0	0	0	0	0	0	0	0	0	0	0
CSF2RB	0	0	0	0	0	0	0	0	0	0	0	0	0	1	0	0	0	0	0	0	0	0	0	0	0	0	0	0	0	0	0	0	0	0	0	0	0	0	0	0	0	0	0	0	0	0	0	0	0
SMC1B	0	0	0	0	0	0	0	0	0	0	0	0	0	1	0	0	0	0	0	0	0	0	0	0	0	0	0	0	0	0	0	0	0	0	0	0	0	0	0	0	0	0	0	0	0	0	0	0	0
CUL4B	0	0	0	0	0	0	0	0	0	0	0	0	0	1	0	0	0	0	0	0	0	0	0	0	0	0	0	0	0	0	0	0	0	0	0	0	0	0	0	0	0	0	0	0	0	0	0	0	0
MAPRE3	0	0	0	0	0	0	0	0	0	0	0	0	0	0	1	0	0	0	0	0	0	0	0	0	0	0	0	0	0	0	0	0	0	0	0	0	0	1	0	0	0	0	0	0	0	0	0	0	0
IL1RL2	0	0	0	0	0	0	0	0	0	0	0	0	0	0	1	0	0	0	0	0	0	0	0	0	0	0	0	0	0	0	0	0	0	0	0	0	0	0	0	0	0	0	0	0	0	0	0	0	0
CKAP2L	0	0	0	0	0	0	0	0	0	0	0	0	0	0	1	0	0	0	0	0	0	0	0	0	0	0	0	0	0	0	0	0	0	0	0	0	0	0	0	0	0	0	0	0	0	0	0	0	0
RUBCN	0	0	0	0	0	0	0	0	0	0	0	0	0	0	1	0	0	0	0	0	0	0	0	0	0	0	0	0	0	0	0	0	0	0	0	0	0	0	0	0	0	0	0	0	0	0	0	0	0
SFRP2	0	0	0	0	0	0	0	0	0	0	0	0	0	0	1	0	0	0	0	0	0	0	0	0	0	0	0	0	0	0	0	0	0	0	0	0	0	0	0	0	0	0	0	0	0	0	0	0	0
ZNF12	0	0	0	0	0	0	0	0	0	0	0	0	0	0	1	0	0	0	0	0	0	0	0	0	0	0	0	0	1	0	0	0	0	0	0	0	0	0	0	0	0	0	0	0	0	0	0	0	0
AUTS2	0	0	0	0	0	0	0	0	0	0	0	0	0	0	1	0	0	0	0	0	0	0	0	0	0	0	0	0	0	0	0	0	0	0	0	0	0	0	0	0	0	0	0	0	0	0	0	0	0
MUC17	0	0	0	0	0	0	0	0	0	0	0	0	0	0	1	0	0	0	0	0	0	0	0	0	0	0	0	0	0	0	0	0	0	0	0	0	1	0	0	0	0	0	0	0	0	0	0	0	0
LAMB1	0	0	0	0	0	0	0	0	0	0	0	0	0	0	1	0	0	0	0	0	0	0	0	0	0	0	0	0	0	0	1	0	0	0	0	0	0	0	0	0	0	0	0	0	0	0	0	0	0
HPSE2	0	0	0	0	0	0	0	0	0	0	0	0	0	0	1	0	0	0	0	0	0	0	0	0	0	0	0	0	0	0	0	0	0	0	0	0	0	0	0	0	0	0	0	0	0	0	0	0	0
SLC22A6	0	0	0	0	0	0	0	0	0	0	0	0	0	0	1	0	0	0	1	0	0	0	0	0	0	0	0	0	0	0	0	0	0	0	0	0	0	0	0	0	0	0	0	0	0	0	0	0	0
FGD6	0	0	0	0	0	0	0	0	0	0	0	0	0	0	1	0	0	0	0	0	0	0	0	1	0	0	0	0	0	0	0	0	0	0	0	0	0	0	0	0	0	0	0	0	0	0	0	0	0
FBXL3	0	0	0	0	0	0	0	0	0	0	0	0	0	0	1	0	0	0	0	0	0	0	0	0	0	0	0	0	0	0	0	0	0	0	0	0	0	0	0	0	0	0	0	0	0	0	0	0	0
CYLD	0	0	0	0	0	0	0	0	0	0	0	0	0	0	1	0	0	0	0	0	0	0	0	0	0	0	0	0	0	0	0	0	0	0	0	0	0	0	0	0	0	0	0	0	0	0	0	0	0
CD300LG	0	0	0	0	0	0	0	0	0	0	0	0	0	0	1	0	0	0	0	0	0	0	0	0	0	0	0	0	0	0	0	0	0	0	0	0	0	0	0	0	0	0	0	0	0	0	0	0	0
NBPF20	0	0	0	0	0	0	0	0	0	0	0	0	0	0	0	1	0	0	0	0	0	0	0	0	0	0	0	0	0	0	0	0	0	0	0	0	0	0	0	0	0	0	0	0	0	0	0	0	0
EMX1	0	0	0	0	0	0	0	0	0	0	0	0	0	0	0	1	0	0	0	0	0	0	0	0	0	0	0	0	0	0	0	0	0	0	0	0	0	0	0	0	0	0	0	0	0	0	0	0	0
MYL1	0	0	0	0	0	0	0	0	0	0	0	0	0	0	0	1	0	0	0	0	0	0	0	0	0	0	0	0	0	0	0	0	0	0	0	0	0	0	0	0	0	0	0	0	0	0	0	0	0
DAW1	0	0	0	0	0	0	0	0	0	0	0	0	0	0	0	1	0	0	0	0	0	0	0	0	0	0	0	0	0	0	0	0	0	0	0	0	0	0	0	0	0	0	0	0	0	0	0	0	0
IGSF11	0	0	0	0	0	0	0	0	0	0	0	0	0	0	0	1	0	0	0	0	0	0	0	0	0	0	0	0	0	0	0	0	0	0	0	0	0	0	0	0	0	0	0	0	0	0	0	0	0
RPL34	0	0	0	0	0	0	0	0	0	0	0	0	0	0	0	1	0	0	0	0	0	0	0	0	0	0	0	0	0	0	0	0	0	0	1	0	0	0	0	0	0	0	0	0	0	0	0	0	0
GYPE	0	0	0	0	0	0	0	0	0	0	0	0	0	0	0	1	0	0	0	0	0	0	0	0	0	0	0	0	0	0	0	0	0	0	0	0	0	0	0	0	0	0	0	0	0	0	0	0	0
CLK4	0	0	0	0	0	0	0	0	0	0	0	0	0	0	0	1	0	0	0	0	0	0	0	0	0	0	0	0	0	0	0	0	0	0	0	0	0	0	0	0	0	0	0	0	0	0	0	0	0
ELOVL4	0	0	0	0	0	0	0	0	0	0	0	0	0	0	0	1	0	0	0	0	0	0	0	0	0	0	0	0	0	0	0	0	0	0	0	0	0	0	0	0	0	0	0	0	0	0	0	0	0
ANKRD6	0	0	0	0	0	0	0	0	0	0	0	0	0	0	0	1	0	0	0	0	0	0	0	0	0	0	0	0	0	0	0	0	0	0	0	0	0	0	0	0	0	0	0	0	0	0	0	0	0
MAN1A1	0	0	0	0	0	0	0	0	0	0	0	0	0	0	0	1	0	0	0	0	0	0	0	0	0	0	0	0	0	0	0	0	0	1	0	0	0	0	0	0	0	0	0	0	0	0	0	0	0
HECA	0	0	0	0	0	0	0	0	0	0	0	0	0	0	0	1	0	0	0	0	0	0	0	0	0	0	0	0	0	0	0	0	0	0	0	0	0	0	0	0	0	0	0	0	0	0	0	0	0
ABCB5	0	0	0	0	0	0	0	0	0	0	0	0	0	0	0	1	0	0	0	0	0	0	0	0	0	0	0	0	0	0	0	0	0	0	0	0	0	0	0	0	0	0	0	0	0	0	0	0	0
CREB3L2	0	0	0	0	0	0	0	0	0	0	0	0	0	0	0	1	0	0	0	0	0	0	0	0	0	0	0	0	0	0	0	0	0	0	0	0	0	0	0	0	0	0	0	0	0	0	0	0	0
TM2D2	0	0	0	0	0	0	0	0	0	0	0	0	0	0	0	1	0	0	0	0	0	0	0	0	0	0	0	0	0	0	0	0	0	0	0	0	0	0	0	0	0	0	0	0	0	0	0	0	0
ERICH5	0	0	0	0	0	0	0	0	0	0	0	0	0	0	0	1	0	0	0	0	0	0	0	0	0	0	0	0	0	0	0	0	0	0	0	0	0	0	0	0	0	0	0	0	0	0	0	0	0
ENPP2	0	0	0	0	0	0	0	0	0	0	0	0	0	0	0	1	0	0	0	0	0	0	0	0	0	0	0	0	0	0	0	0	0	0	0	0	0	0	0	0	0	0	0	0	0	0	0	0	0
VPS13A	0	0	0	0	0	0	0	0	0	0	0	0	0	0	0	1	0	0	0	0	0	0	0	0	0	0	0	0	0	1	0	0	0	0	0	0	0	0	0	0	0	0	0	0	0	0	0	0	0
MMP8	0	0	0	0	0	0	0	0	0	0	0	0	0	0	0	1	0	0	0	0	0	0	0	0	0	0	0	0	0	0	0	0	0	0	0	0	0	0	0	0	0	0	0	0	0	0	0	0	0
CACNA2D4	0	0	0	0	0	0	0	0	0	0	0	0	0	0	0	1	0	0	0	0	0	0	0	1	0	0	0	0	0	0	0	0	0	0	0	0	0	0	0	0	0	0	0	0	0	0	0	0	0
KRT6A	0	0	0	0	0	0	0	0	0	0	0	0	0	0	0	1	0	0	0	0	0	0	0	0	0	0	0	0	0	0	0	0	0	0	0	0	0	0	0	0	0	0	0	0	0	0	0	0	0
PSMA6	0	0	0	0	0	0	0	0	0	0	0	0	0	0	0	1	0	0	0	0	0	0	0	0	0	0	0	0	0	0	0	0	0	0	0	0	0	0	0	0	0	0	0	0	0	0	0	0	0
LMAN1L	0	0	0	0	0	0	0	0	0	0	0	0	0	0	0	1	0	0	0	0	0	0	0	0	0	0	0	0	0	0	0	0	0	0	0	0	0	0	0	0	0	0	0	0	0	0	0	0	0
PSKH1	0	0	0	0	0	0	0	0	0	0	0	0	0	0	0	1	0	0	0	0	0	0	0	0	0	0	0	0	0	0	0	0	0	0	0	0	0	0	0	0	0	0	0	0	0	0	0	0	0
NCOR1	0	0	0	0	0	0	0	0	0	0	0	0	0	0	0	1	0	0	0	0	0	0	0	0	0	0	0	0	0	0	0	0	0	0	0	0	0	0	0	0	0	0	0	0	0	0	0	0	0
TNFRSF13B	0	0	0	0	0	0	0	0	0	0	0	0	0	0	0	1	0	0	0	0	0	0	0	0	0	0	0	0	0	0	0	0	0	0	0	0	0	0	0	0	0	0	0	0	0	0	0	0	0
IKZF3	0	0	0	0	0	0	0	0	0	0	0	0	0	0	0	1	0	0	0	0	0	0	0	0	0	0	0	0	0	0	0	0	0	0	0	0	0	0	0	0	0	0	0	0	0	0	0	0	0
KRT12	0	0	0	0	0	0	0	0	0	0	0	0	0	0	0	1	0	0	0	0	0	0	0	0	0	0	0	0	0	0	0	0	0	0	0	0	0	0	0	0	0	0	0	0	0	0	0	0	0
CD300LF	0	0	0	0	0	0	0	0	0	0	0	0	0	0	0	1	0	0	0	0	0	0	0	0	0	0	0	0	0	0	0	0	0	0	0	0	0	0	0	0	0	0	0	0	0	0	0	0	0
QTRT1	0	0	0	0	0	0	0	0	0	0	0	0	0	0	0	1	0	0	0	0	0	0	0	0	0	0	0	0	0	0	0	0	0	0	0	0	0	0	0	0	0	0	0	0	0	0	0	0	0
ZNF606	0	0	0	0	0	0	0	0	0	0	0	0	0	0	0	1	0	0	0	0	0	0	0	0	0	0	0	0	0	0	0	0	0	0	0	0	0	0	0	0	0	0	0	0	0	0	0	0	0
CELSR1	0	0	0	0	0	0	0	0	0	0	0	0	0	0	0	1	0	0	0	0	0	0	0	0	0	0	0	0	0	1	0	0	0	0	0	0	0	0	0	0	0	0	0	0	0	0	0	0	0
MAP3K15	0	0	0	0	0	0	0	0	0	0	0	0	0	0	0	1	0	0	0	0	0	0	0	0	0	0	0	0	0	0	0	0	0	0	0	0	0	0	0	0	0	0	0	0	0	0	0	0	0
CHD5	0	0	0	0	0	0	0	0	0	0	0	0	0	0	0	0	1	0	0	0	0	0	0	0	0	0	0	0	0	0	0	0	0	0	0	0	0	0	0	0	0	0	0	0	0	0	0	0	0
ENO1	0	0	0	0	0	0	0	0	0	0	0	0	0	0	0	0	1	0	0	0	0	0	0	0	0	0	0	0	0	0	0	0	0	0	0	0	0	0	0	0	0	0	0	0	0	0	0	0	0
ANGPTL7	0	0	0	0	0	0	0	0	0	0	0	0	0	0	0	0	1	0	0	0	0	0	0	0	0	0	0	0	0	0	0	0	0	0	0	0	0	0	0	0	0	0	0	0	0	0	0	0	0
AADACL3	0	0	0	0	0	0	0	0	0	0	0	0	0	0	0	0	1	0	0	0	0	0	0	0	0	0	0	0	0	0	0	0	0	0	0	0	0	0	0	0	0	0	0	0	0	0	0	0	0
RSRP1	0	0	0	0	0	0	0	0	0	0	0	0	0	0	0	0	1	0	0	0	0	0	0	0	0	0	0	0	0	0	0	0	0	0	0	0	0	0	0	0	0	0	0	0	0	0	0	0	0
WDTC1	0	0	0	0	0	0	0	0	0	0	0	0	0	0	0	0	1	0	0	0	0	0	0	0	0	0	0	0	0	0	0	0	0	0	0	0	0	0	0	0	0	0	0	0	0	0	0	0	0
C1orf94	0	0	0	0	0	0	0	0	0	0	0	0	0	0	0	0	1	0	0	0	0	0	0	0	0	0	0	0	0	0	0	0	0	0	0	0	0	0	0	0	0	0	0	0	0	0	0	0	0
IPP	0	0	0	0	0	0	0	0	0	0	0	0	0	0	0	0	1	0	0	0	0	1	0	0	0	0	0	0	0	0	0	0	0	0	0	0	0	0	0	0	0	0	0	0	0	0	0	0	0
DNAJB4	0	0	0	0	0	0	0	0	0	0	0	0	0	0	0	0	1	0	0	0	0	0	0	0	0	0	0	0	0	0	0	0	0	0	0	0	0	0	0	0	0	0	0	0	0	0	0	0	0
HFM1	0	0	0	0	0	0	0	0	0	0	0	0	0	0	0	0	1	0	0	0	0	0	0	0	0	0	0	0	0	0	0	0	0	0	0	0	0	0	0	0	0	0	0	0	0	0	0	0	0
PHTF1	0	0	0	0	0	0	0	0	0	0	0	0	0	0	0	0	1	0	0	0	0	0	0	0	0	0	0	0	0	0	0	0	0	0	0	0	0	0	0	0	0	0	0	0	0	0	0	0	0
ATP1A1	0	0	0	0	0	0	0	0	0	0	0	0	0	0	0	0	1	0	0	0	0	0	0	0	0	0	0	0	0	0	0	0	0	0	0	0	0	0	0	0	0	0	0	0	0	0	0	0	0
TARS2	0	0	0	0	0	0	0	0	0	0	0	0	0	0	0	0	1	0	0	0	0	0	0	0	0	0	0	0	0	0	0	0	0	0	0	0	0	0	0	0	0	0	0	0	0	0	0	0	0
ANGPTL1	0	0	0	0	0	0	0	0	0	0	0	0	0	0	0	0	1	0	0	0	0	0	0	0	0	0	0	0	0	0	0	0	0	0	0	0	0	0	0	0	0	0	0	0	0	0	0	0	0
CTSE	0	0	0	0	0	0	0	0	0	0	0	0	0	0	0	0	1	0	0	0	0	0	0	0	0	0	0	0	0	0	0	0	0	0	0	0	0	0	0	0	0	0	0	0	0	0	0	0	0
USH2A	0	0	0	0	0	0	0	0	0	0	0	0	0	0	0	0	1	0	1	0	0	0	0	0	0	0	0	0	1	0	0	0	0	0	0	0	0	0	0	0	0	0	0	0	0	0	0	0	0
OR2L8	0	0	0	0	0	0	0	0	0	0	0	0	0	0	0	0	1	0	0	0	0	0	0	0	0	0	0	0	0	0	0	0	0	1	0	0	0	0	0	0	0	0	0	0	0	0	0	0	0
OR2T12	0	0	0	0	0	0	0	0	0	0	0	0	0	0	0	0	1	0	0	0	0	0	0	0	0	0	0	0	0	0	0	0	0	0	0	0	0	0	0	0	0	0	0	0	0	0	0	0	0
OTOF	0	0	0	0	0	0	0	0	0	0	0	0	0	0	0	0	1	0	0	0	0	0	0	0	0	0	0	0	0	0	0	0	0	0	0	0	0	0	0	0	0	0	0	0	0	0	0	0	0
RIF1	0	0	0	0	0	0	0	0	0	0	0	0	0	0	0	0	1	0	0	0	0	0	0	0	0	0	0	0	0	0	0	0	0	0	0	0	0	0	1	0	0	0	0	0	0	0	0	0	0
GULP1	0	0	0	0	0	0	0	0	0	0	0	0	0	0	0	0	1	0	0	0	0	0	0	0	0	0	0	0	0	0	0	0	0	0	0	0	0	0	0	0	0	0	0	0	0	0	0	0	0
MFSD6	0	0	0	0	0	0	0	0	0	0	0	0	0	0	0	0	1	0	0	0	0	0	0	0	0	0	0	0	0	0	0	0	0	0	0	0	0	0	0	0	0	0	0	0	0	0	0	0	0
ANKRD44	0	0	0	0	0	0	0	0	0	0	0	0	0	0	0	0	1	0	0	0	0	0	0	0	0	0	0	0	0	0	0	0	0	0	0	0	0	0	0	0	0	0	0	0	0	0	0	0	0
CASP10	0	0	0	0	0	0	0	0	0	0	0	0	0	0	0	0	1	0	0	0	0	1	0	0	0	0	0	0	0	0	0	0	0	0	0	0	0	0	0	0	0	0	0	0	0	0	0	0	0
ABCA12	0	0	0	0	0	0	0	0	0	0	0	0	0	0	0	0	1	0	0	0	0	0	0	0	0	0	0	0	0	0	0	0	0	0	0	0	0	0	0	0	0	0	0	0	0	0	0	0	0
SCN10A	0	0	0	0	0	0	0	0	0	0	0	0	0	0	0	0	1	0	0	0	0	0	0	0	0	0	0	0	0	0	0	0	0	0	0	0	0	0	0	0	0	0	0	0	0	0	0	0	0
MAP4	0	0	0	0	0	0	0	0	0	0	0	0	0	0	0	0	1	0	0	0	0	0	0	0	0	0	0	0	0	0	0	0	0	0	0	0	0	0	0	0	0	0	0	0	0	0	0	0	0
UBA7	0	0	0	0	0	0	0	0	0	0	0	0	0	0	0	0	1	0	0	0	0	0	0	0	0	0	0	0	0	0	0	0	0	0	0	0	0	0	0	0	0	0	0	0	0	0	0	0	0
AMOTL2	0	0	0	0	0	0	0	0	0	0	0	0	0	0	0	0	1	0	0	0	0	0	0	0	0	0	0	0	0	0	0	0	0	0	0	0	0	0	0	0	0	0	0	0	0	0	0	0	0
CEP63	0	0	0	0	0	0	0	0	0	0	0	0	0	0	0	0	1	0	0	0	0	0	0	0	0	0	0	0	0	0	0	0	0	0	0	0	0	0	0	0	0	0	0	0	0	0	0	0	0
GOLIM4	0	0	0	0	0	0	0	0	0	0	0	0	0	0	0	0	1	0	0	0	0	0	0	0	0	0	0	0	0	0	0	0	0	0	0	0	0	0	0	0	0	0	0	0	0	0	0	0	0
SLC7A14	0	0	0	0	0	0	0	0	0	0	0	0	0	0	0	0	1	0	0	0	0	0	0	0	0	0	0	0	0	0	0	0	0	0	0	0	0	0	0	0	0	0	0	0	0	0	0	0	0
ATP13A5	0	0	0	0	0	0	0	0	0	0	0	0	0	0	0	0	1	0	0	0	0	0	0	0	0	0	0	0	0	0	0	0	0	0	0	0	0	0	0	0	0	0	0	0	0	0	0	0	0
PIGG	0	0	0	0	0	0	0	0	0	0	0	0	0	0	0	0	1	0	0	0	0	0	0	0	0	0	0	0	0	0	0	0	0	0	0	0	0	0	0	0	0	0	0	0	0	0	0	0	0
HTT	0	0	0	0	0	0	0	0	0	0	0	0	0	0	0	0	1	0	0	0	0	0	0	0	0	0	0	0	0	0	0	0	0	0	0	0	0	0	0	0	0	0	0	0	0	0	0	0	0
SPEF2	0	0	0	0	0	0	0	0	0	0	0	0	0	0	0	0	1	0	0	0	0	0	0	0	0	0	0	0	0	0	0	0	0	0	0	0	0	0	0	0	0	0	0	0	0	0	0	0	0
PDLIM4	0	0	0	0	0	0	0	0	0	0	0	0	0	0	0	0	1	0	0	0	0	0	0	0	0	0	0	0	0	0	0	0	0	0	0	0	0	0	0	0	0	0	0	0	0	0	0	0	0
TRPC7	0	0	0	0	0	0	0	0	0	0	0	0	0	0	0	0	1	0	0	0	0	0	0	0	0	0	0	0	0	0	0	0	0	0	0	0	0	0	0	0	0	0	0	0	0	0	0	0	0
TCOF1	0	0	0	0	0	0	0	0	0	0	0	0	0	0	0	0	1	0	0	0	0	0	0	1	0	0	0	0	0	0	0	0	0	0	0	0	0	0	0	0	0	0	0	0	0	0	0	0	0
ADAM19	0	0	0	0	0	0	0	0	0	0	0	0	0	0	0	0	1	0	0	0	0	0	0	0	0	0	0	0	0	0	0	0	0	0	0	0	0	0	0	0	0	0	0	0	0	0	0	0	0
CPLX2	0	0	0	0	0	0	0	0	0	0	0	0	0	0	0	0	1	0	0	0	0	0	0	0	0	0	0	0	0	0	0	0	0	0	0	0	0	0	0	0	0	0	0	0	0	0	0	0	0
FAM217A	0	0	0	0	0	0	0	0	0	0	0	0	0	0	0	0	1	0	0	0	0	0	0	0	0	0	0	0	0	0	0	0	0	0	0	0	0	0	0	0	0	0	0	0	0	0	0	0	0
HSP90AB1	0	0	0	0	0	0	0	0	0	0	0	0	0	0	0	0	1	0	0	0	0	0	0	0	0	0	0	0	0	0	0	0	0	0	0	0	0	0	0	0	0	0	0	0	0	0	0	0	0
ZNF451	0	0	0	0	0	0	0	0	0	0	0	0	0	0	0	0	1	0	0	0	0	0	0	0	0	0	0	0	0	0	0	0	0	0	0	0	0	0	0	1	0	0	0	0	0	0	0	0	0
ZNF292	0	0	0	0	0	0	0	0	0	0	0	0	0	0	0	0	1	0	0	0	0	0	0	0	0	0	0	0	0	0	0	0	0	0	0	0	0	0	0	0	0	0	0	0	0	0	0	0	0
UTRN	0	0	0	0	0	0	0	0	0	0	0	0	0	0	0	0	1	0	0	1	0	0	0	0	0	0	0	0	0	0	0	0	0	0	0	0	0	0	0	0	0	0	0	0	0	0	0	0	0
TIAM2	0	0	0	0	0	0	0	0	0	0	0	0	0	0	0	0	1	0	0	0	0	0	0	0	0	0	0	0	0	0	0	0	0	0	0	0	0	0	0	0	0	0	0	0	0	0	0	0	0
WIPI2	0	0	0	0	0	0	0	0	0	0	0	0	0	0	0	0	1	0	0	0	0	0	0	0	0	0	0	0	0	0	0	0	0	0	0	0	0	0	0	0	0	0	0	0	0	0	0	0	0
ADCYAP1R1	0	0	0	0	0	0	0	0	0	0	0	0	0	0	0	0	1	0	0	0	0	0	0	0	0	0	0	0	0	0	0	0	0	0	0	0	0	0	0	0	0	0	0	0	0	0	0	0	0
KCNU1	0	0	0	0	0	0	0	0	0	0	0	0	0	0	0	0	1	0	0	0	0	0	0	0	0	0	0	0	0	0	0	0	0	0	0	0	0	0	0	0	0	0	0	0	0	0	0	0	0
MSC	0	0	0	0	0	0	0	0	0	0	0	0	0	0	0	0	1	0	0	0	0	0	0	0	0	0	0	0	0	0	0	0	0	0	0	0	0	0	0	0	0	0	0	0	0	0	0	0	0
GLDC	0	0	0	0	0	0	0	0	0	0	0	0	0	0	0	0	1	0	0	0	0	0	0	0	0	0	0	0	0	0	0	0	0	0	0	0	0	0	0	0	0	0	0	0	0	0	0	0	0
ENHO	0	0	0	0	0	0	0	0	0	0	0	0	0	0	0	0	1	0	0	0	0	0	0	0	0	0	0	0	0	0	0	0	0	0	0	0	0	0	0	0	0	0	0	0	0	0	0	0	0
STRBP	0	0	0	0	0	0	0	0	0	0	0	0	0	0	0	0	1	0	0	0	0	0	0	0	0	0	0	0	0	0	0	0	0	0	0	0	0	0	0	0	0	0	0	0	0	0	0	0	0
PITRM1	0	0	0	0	0	0	0	0	0	0	0	0	0	0	0	0	1	0	0	0	0	0	0	0	0	0	0	0	0	0	0	0	0	0	0	0	0	0	0	0	0	0	0	0	0	0	0	0	0
FRMD4A	0	0	0	0	0	0	0	0	0	0	0	0	0	0	0	0	1	0	0	0	0	0	0	0	0	0	0	0	0	0	0	0	0	0	0	0	0	0	0	0	0	0	0	0	0	0	0	0	0
A1CF	0	0	0	0	0	0	0	0	0	0	0	0	0	0	0	0	1	0	0	0	0	0	0	0	0	0	0	0	0	0	0	0	0	0	0	0	0	0	0	0	0	0	0	0	0	0	0	0	0
KAT6B	0	0	0	0	0	0	0	0	0	0	0	0	0	0	0	0	1	0	0	0	0	0	0	0	0	0	0	0	0	0	0	0	0	0	0	0	0	0	0	0	0	0	0	0	0	0	0	0	0
HSPA12A	0	0	0	0	0	0	0	0	0	0	0	0	0	0	0	0	1	0	0	0	0	0	0	0	0	0	0	0	0	0	0	0	1	0	0	0	0	0	0	0	0	0	0	0	0	0	0	0	0
DENND5A	0	0	0	0	0	0	0	0	0	0	0	0	0	0	0	0	1	0	0	0	0	0	0	0	0	0	0	0	0	0	0	0	0	0	0	0	0	0	0	0	0	0	0	0	0	0	0	0	0
ARNTL	0	0	0	0	0	0	0	0	0	0	0	0	0	0	0	0	1	0	0	0	0	0	0	0	0	0	0	0	0	0	0	0	0	0	0	0	0	0	0	0	0	0	0	0	0	0	0	0	0
E2F8	0	0	0	0	0	0	0	0	0	0	0	0	0	0	0	0	1	0	0	0	0	0	0	0	0	0	0	0	0	0	0	0	0	0	0	0	0	0	0	0	0	0	0	0	0	0	0	0	0
DCDC1	0	0	0	0	0	0	0	0	0	0	0	0	0	0	0	0	1	0	0	0	1	0	0	0	0	0	0	0	0	0	0	0	0	0	0	0	0	0	0	0	0	0	0	0	0	0	0	0	0
LRRC32	0	0	0	0	0	0	0	0	0	0	0	0	0	0	0	0	1	0	0	0	0	0	0	0	0	0	0	0	0	0	0	0	0	0	0	0	0	0	0	0	0	0	0	0	0	0	0	0	0
OR10S1	0	0	0	0	0	0	0	0	0	0	0	0	0	0	0	0	1	0	0	0	0	0	0	0	0	0	0	0	0	0	0	0	0	0	0	0	0	0	0	0	0	0	0	0	0	0	0	0	0
SCNN1A	0	0	0	0	0	0	0	0	0	0	0	0	0	0	0	0	1	0	0	0	0	0	0	0	0	0	0	0	0	0	0	0	0	0	0	0	0	0	0	0	0	0	0	0	0	0	0	0	0
AICDA	0	0	0	0	0	0	0	0	0	0	0	0	0	0	0	0	1	0	0	0	0	0	0	0	0	0	0	0	0	0	0	0	0	0	0	0	0	0	0	0	0	0	0	0	0	0	0	0	0
FRS2	0	0	0	0	0	0	0	0	0	0	0	0	0	0	0	0	1	0	0	0	0	0	0	0	0	0	0	0	0	0	0	0	0	0	0	0	0	0	0	0	0	0	0	0	0	0	0	0	0
EPYC	0	0	0	0	0	0	0	0	0	0	0	0	0	0	0	0	1	0	0	0	0	0	0	0	0	0	0	0	0	0	0	0	0	0	0	0	0	0	0	0	0	0	0	0	0	0	0	0	0
CEP83	0	0	0	0	0	0	0	0	0	0	0	0	0	0	0	0	1	0	0	0	0	0	0	0	0	0	0	0	0	0	0	0	0	0	0	0	0	0	0	0	0	0	0	0	0	0	0	0	0
GPR65	0	0	0	0	0	0	0	0	0	0	0	0	0	0	0	0	1	0	0	0	0	0	0	0	0	0	0	0	0	0	0	0	0	0	0	0	0	0	0	0	0	0	0	0	0	0	0	0	0
FBN1	0	0	0	0	0	0	0	0	0	0	0	0	0	0	0	0	1	0	0	0	0	0	0	0	0	0	0	0	0	0	0	0	0	0	0	0	0	0	0	0	0	0	0	0	0	0	0	0	0
DMXL2	0	0	0	0	0	0	0	0	0	0	0	0	0	0	0	0	1	0	0	0	0	0	0	0	0	0	0	0	0	0	0	0	0	0	0	0	0	0	0	0	0	0	0	0	0	0	0	0	0
SCG3	0	0	0	0	0	0	0	0	0	0	0	0	0	0	0	0	1	0	0	0	0	0	0	0	0	0	0	0	0	0	0	0	0	0	0	0	0	0	0	0	0	0	0	0	0	0	0	0	0
LDHAL6B	0	0	0	0	0	0	0	0	0	0	0	0	0	0	0	0	1	0	0	0	0	0	0	0	0	0	0	0	0	0	0	0	0	0	0	0	0	0	0	0	0	0	0	0	0	0	0	0	0
IFT140	0	0	0	0	0	0	0	0	0	0	0	0	0	0	0	0	1	0	0	0	0	0	0	0	0	0	0	0	0	0	0	0	0	0	0	0	0	0	0	0	1	0	0	0	0	0	0	0	0
C16orf71	0	0	0	0	0	0	0	0	0	0	0	0	0	0	0	0	1	0	0	0	0	0	0	0	0	0	0	0	0	0	0	0	0	0	0	0	0	0	0	0	0	0	0	0	0	0	0	0	0
DNAH3	0	0	0	0	0	0	0	0	0	0	0	0	0	0	0	0	1	0	0	0	0	0	0	0	0	0	0	0	0	0	0	1	0	0	0	0	0	0	0	0	0	0	0	0	0	0	0	0	0
TNK1	0	0	0	0	0	0	0	0	0	0	0	0	0	0	0	0	1	0	0	0	0	0	0	0	0	0	0	0	0	0	0	0	0	0	0	0	0	0	0	0	0	0	0	0	0	0	0	0	0
ATPAF2	0	0	0	0	0	0	0	0	0	0	0	0	0	0	0	0	1	0	0	0	0	0	0	0	0	0	0	0	0	0	0	0	0	0	0	0	0	0	0	0	0	0	0	0	0	0	0	0	0
B9D1	0	0	0	0	0	0	0	0	0	0	0	0	0	0	0	0	1	0	0	0	0	0	0	0	0	0	0	0	0	0	0	0	0	0	0	0	0	0	0	0	0	0	0	0	0	0	0	0	0
PHF12	0	0	0	0	0	0	0	0	0	0	0	0	0	0	0	0	1	0	0	0	0	0	0	0	0	0	0	0	0	0	0	0	0	0	0	0	0	0	0	0	0	0	0	0	0	0	0	0	0
NF1	0	0	0	0	0	0	0	0	0	0	0	0	0	0	0	0	1	0	0	0	0	0	0	0	0	0	0	0	0	0	0	0	0	0	0	0	0	0	0	0	0	0	0	0	0	0	0	0	1
UNC45B	0	0	0	0	0	0	0	0	0	0	0	0	0	0	0	0	1	0	0	0	0	0	0	0	0	0	0	0	0	0	0	0	0	0	0	0	0	0	0	0	0	0	0	0	0	0	0	0	0
MAP2K7	0	0	0	0	0	0	0	0	0	0	0	0	0	0	0	0	1	0	0	0	0	0	0	0	0	0	0	0	0	0	0	0	0	0	0	0	0	0	0	0	0	0	0	0	0	0	0	0	0
ZNF781	0	0	0	0	0	0	0	0	0	0	0	0	0	0	0	0	1	0	0	0	0	0	0	0	0	0	0	0	0	0	0	0	0	0	0	0	0	0	0	0	0	0	0	0	0	0	0	0	0
FAM83E	0	0	0	0	0	0	0	0	0	0	0	0	0	0	0	0	1	0	0	0	0	0	0	0	0	0	0	0	0	0	0	0	0	0	0	0	0	0	0	0	0	0	0	0	0	0	0	0	0
ZNF347	0	0	0	0	0	0	0	0	0	0	0	0	0	0	0	0	1	0	0	0	0	0	0	0	0	0	0	0	0	0	0	0	0	0	0	0	0	0	0	0	0	0	0	0	0	0	0	0	0
KIF16B	0	0	0	0	0	0	0	0	0	0	0	0	0	0	0	0	1	0	0	0	0	0	0	0	0	0	0	0	0	0	0	0	0	0	0	0	0	0	0	0	0	0	0	0	0	0	0	0	0
TUBB1	0	0	0	0	0	0	0	0	0	0	0	0	0	0	0	0	1	0	0	0	0	0	0	0	0	0	0	0	0	0	0	0	0	0	0	0	0	0	0	0	0	0	0	0	0	0	0	0	0
EIF3L	0	0	0	0	0	0	0	0	0	0	0	0	0	0	0	0	1	0	0	0	0	0	0	0	0	0	0	0	0	0	0	0	0	0	0	0	0	0	0	0	0	0	0	0	0	0	0	0	0
DMD	0	0	0	0	0	0	0	0	0	0	0	0	0	0	0	0	1	0	0	0	0	0	0	0	0	0	0	0	0	0	0	0	0	0	0	0	0	0	0	0	0	0	0	0	0	0	0	0	0
SMARCA1	0	0	0	0	0	0	0	0	0	0	0	0	0	0	0	0	1	0	0	0	0	0	0	0	0	0	0	0	0	0	0	0	0	0	0	0	0	0	0	0	0	0	0	0	0	0	0	0	0
MFSD14A	0	0	0	0	0	0	0	0	0	0	0	0	0	0	0	0	0	1	0	0	0	0	0	0	0	0	0	0	0	0	0	0	0	0	0	0	0	0	0	0	0	0	0	0	0	0	0	0	0
GPSM2	0	0	0	0	0	0	0	0	0	0	0	0	0	0	0	0	0	1	0	0	0	0	0	0	0	0	0	0	0	0	0	0	0	0	0	0	0	0	0	0	0	0	0	0	0	0	0	0	0
SDE2	0	0	0	0	0	0	0	0	0	0	0	0	0	0	0	0	0	1	0	0	0	0	0	0	0	0	0	0	0	0	0	0	0	0	0	0	0	0	0	0	0	0	0	0	0	0	0	0	0
CNST	0	0	0	0	0	0	0	0	0	0	0	0	0	0	0	0	0	1	0	0	0	0	0	0	0	0	0	0	0	0	0	0	0	0	0	0	0	0	0	0	0	0	0	0	0	0	0	0	0
TNFAIP6	0	0	0	0	0	0	0	0	0	0	0	0	0	0	0	0	0	1	0	0	0	0	0	0	0	0	0	0	0	0	0	0	0	0	0	0	0	0	0	0	0	0	0	0	0	0	0	0	0
UGT1A4	0	0	0	0	0	0	0	0	0	0	0	0	0	0	0	0	0	1	0	0	0	0	0	0	0	0	0	0	0	0	0	0	0	0	0	0	0	0	0	0	0	0	0	0	0	0	0	0	0
GPR156	0	0	0	0	0	0	0	0	0	0	0	0	0	0	0	0	0	1	0	0	0	0	0	0	0	0	0	0	0	0	0	0	0	0	0	0	0	0	0	0	0	0	0	0	0	0	0	0	0
PAPSS1	0	0	0	0	0	0	0	0	0	0	0	0	0	0	0	0	0	1	0	0	0	0	0	0	0	0	0	0	0	0	0	0	0	0	0	0	0	0	0	0	0	0	0	0	0	0	0	0	0
TCP11	0	0	0	0	0	0	0	0	0	0	0	0	0	0	0	0	0	1	0	0	0	0	0	0	0	0	0	0	0	0	0	0	0	0	0	0	0	0	0	0	0	0	0	0	0	0	0	0	0
FBXO30	0	0	0	0	0	0	0	0	0	0	0	0	0	0	0	0	0	1	0	0	0	0	0	0	0	0	0	0	0	0	0	0	0	0	0	0	0	0	0	0	0	0	0	0	0	0	0	0	0
SDK1	0	0	0	0	0	0	0	0	0	0	0	0	0	0	0	0	0	1	0	0	0	0	0	0	0	0	0	0	0	0	0	0	0	0	0	0	0	0	0	0	0	0	0	0	0	0	0	0	0
RBAK	0	0	0	0	0	0	0	0	0	0	0	0	0	0	0	0	0	1	0	0	0	0	0	0	0	0	0	0	0	0	0	0	0	0	0	0	0	0	0	0	0	0	0	0	0	0	0	0	0
CCDC126	0	0	0	0	0	0	0	0	0	0	0	0	0	0	0	0	0	1	0	0	0	0	0	0	0	0	0	0	0	0	0	0	0	0	0	0	0	0	0	0	0	0	0	0	0	0	0	0	0
AKAP9	0	0	0	0	0	0	0	0	0	0	0	0	0	0	0	0	0	1	0	0	0	0	0	0	0	0	0	0	0	0	0	0	0	0	0	0	0	0	0	0	0	0	0	0	0	0	0	0	0
CTAGE6	0	0	0	0	0	0	0	0	0	0	0	0	0	0	0	0	0	1	0	0	0	0	0	0	0	0	0	0	0	0	0	0	0	0	0	0	0	0	0	0	0	0	0	0	0	0	0	0	0
NOM1	0	0	0	0	0	0	0	0	0	0	0	0	0	0	0	0	0	1	0	0	0	0	0	0	0	0	0	0	0	0	0	0	0	0	0	0	0	0	0	0	0	0	0	0	0	0	1	0	0
DENND4C	0	0	0	0	0	0	0	0	0	0	0	0	0	0	0	0	0	1	0	0	0	0	0	0	0	0	0	0	0	0	0	0	0	0	0	0	0	0	0	0	0	0	0	0	0	0	0	0	0
TPH1	0	0	0	0	0	0	0	0	0	0	0	0	0	0	0	0	0	1	0	0	0	0	0	0	0	0	0	0	0	0	0	0	0	0	0	0	0	0	0	0	0	0	0	0	0	0	0	0	0
FBXO3	0	0	0	0	0	0	0	0	0	0	0	0	0	0	0	0	0	1	0	0	0	0	0	0	0	0	0	0	0	0	0	0	0	0	0	0	0	0	0	0	0	0	0	0	0	0	0	0	0
LRP5	0	0	0	0	0	0	0	0	0	0	0	0	0	0	0	0	0	1	0	0	0	0	0	0	0	0	0	0	0	0	0	0	0	0	0	0	0	0	0	0	0	0	0	0	0	0	0	0	0
CLPB	0	0	0	0	0	0	0	0	0	0	0	0	0	0	0	0	0	1	0	0	0	0	0	0	0	0	0	0	0	0	0	0	0	0	0	0	0	0	0	0	0	0	0	0	0	0	0	0	0
DPAGT1	0	0	0	0	0	0	0	0	0	0	0	0	0	0	0	0	0	1	0	0	0	0	0	0	0	0	0	0	0	0	0	0	0	0	0	0	0	0	0	0	0	0	0	0	0	0	0	0	0
USP2	0	0	0	0	0	0	0	0	0	0	0	0	0	0	0	0	0	1	0	0	0	0	0	0	0	0	0	0	0	0	0	0	0	0	0	0	0	0	0	0	0	0	0	0	0	0	0	0	0
GRIN2B	0	0	0	0	0	0	0	0	0	0	0	0	0	0	0	0	0	1	0	0	0	0	0	0	0	0	0	0	0	0	0	0	0	0	0	0	0	0	0	0	0	0	0	0	0	0	0	0	0
KRT82	0	0	0	0	0	0	0	0	0	0	0	0	0	0	0	0	0	1	0	0	0	0	0	0	0	0	0	0	0	0	0	0	0	0	0	0	0	0	0	0	0	0	0	0	0	0	0	0	0
EEA1	0	0	0	0	0	0	0	0	0	0	0	0	0	0	0	0	0	1	0	0	0	0	0	0	0	0	0	0	0	0	0	0	0	0	0	0	0	0	0	0	0	0	0	0	0	0	0	0	0
NAA16	0	0	0	0	0	0	0	0	0	0	0	0	0	0	0	0	0	1	0	0	0	0	0	0	0	0	0	0	0	0	0	0	0	0	0	0	0	0	0	0	0	0	0	0	0	0	0	0	0
METTL17	0	0	0	0	0	0	0	0	0	0	0	0	0	0	0	0	0	1	0	0	0	0	0	0	0	0	0	0	0	0	0	0	0	0	0	0	0	0	0	0	0	0	0	0	0	0	0	0	0
PRPF39	0	0	0	0	0	0	0	0	0	0	0	0	0	0	0	0	0	1	0	0	0	0	0	0	0	0	0	0	0	0	0	0	0	0	0	0	0	0	0	0	0	0	0	0	0	0	0	0	0
MAX	0	0	0	0	0	0	0	0	0	0	0	0	0	0	0	0	0	1	0	0	0	0	0	0	0	0	0	0	0	0	0	0	0	0	0	0	0	1	0	0	0	0	0	0	0	0	0	0	0
TDP1	0	0	0	0	0	0	0	0	0	0	0	0	0	0	0	0	0	1	0	0	0	0	0	0	0	0	0	0	0	0	0	0	0	0	0	0	0	0	0	0	0	0	0	0	0	0	0	0	0
RYR3	0	0	0	0	0	0	0	0	0	0	0	0	0	0	0	0	0	1	0	0	0	0	0	0	0	0	0	0	0	0	0	0	0	0	0	0	0	0	0	0	0	0	0	0	1	0	0	0	0
ABAT	0	0	0	0	0	0	0	0	0	0	0	0	0	0	0	0	0	1	0	0	0	0	0	0	0	0	0	0	0	0	0	0	0	0	0	0	0	0	0	0	0	0	0	0	0	0	0	0	0
ACSM2B	0	0	0	0	0	0	0	0	0	0	0	0	0	0	0	0	0	1	0	0	0	0	0	0	0	0	0	0	0	0	0	0	0	0	0	0	0	0	0	0	0	0	0	0	0	0	0	0	0
RPGRIP1L	0	0	0	0	0	0	0	0	0	0	0	0	0	0	0	0	0	1	0	0	0	0	0	0	0	0	0	0	0	0	0	0	0	0	0	0	0	0	0	0	0	0	0	0	0	0	0	0	0
PDPR	0	0	0	0	0	0	0	0	0	0	0	0	0	0	0	0	0	1	0	0	0	0	0	0	0	0	0	0	0	0	0	0	0	0	0	0	0	0	0	0	0	0	0	0	0	0	0	0	0
MYH1	0	0	0	0	0	0	0	0	0	0	0	0	0	0	0	0	0	1	0	0	0	0	0	0	0	0	0	0	0	0	0	0	0	0	0	0	0	0	0	0	0	0	0	0	0	0	0	0	0
SLC47A2	0	0	0	0	0	0	0	0	0	0	0	0	0	0	0	0	0	1	0	0	0	0	0	0	0	0	0	0	0	0	0	0	0	0	0	0	0	0	0	0	0	0	0	0	0	0	0	0	0
KRT13	0	0	0	0	0	0	0	0	0	0	0	0	0	0	0	0	0	1	0	0	0	0	0	0	0	0	0	0	0	0	0	0	0	0	0	0	0	0	0	0	0	0	0	0	0	0	0	0	0
PDK2	0	0	0	0	0	0	0	0	0	0	0	0	0	0	0	0	0	1	0	0	0	0	0	0	0	0	0	0	0	0	0	0	0	0	0	0	0	0	0	0	0	0	0	0	0	0	0	0	0
CDK3	0	0	0	0	0	0	0	0	0	0	0	0	0	0	0	0	0	1	0	0	0	0	0	0	0	0	0	0	0	0	0	0	0	0	0	0	0	0	0	0	0	0	0	0	0	0	0	0	0
DCC	0	0	0	0	0	0	0	0	0	0	0	0	0	0	0	0	0	1	0	0	0	0	0	0	0	0	0	0	0	0	0	0	0	0	0	0	0	0	0	0	0	0	0	0	0	0	0	0	0
CACNA1A	0	0	0	0	0	0	0	0	0	0	0	0	0	0	0	0	0	1	0	0	0	0	0	0	0	0	0	0	0	0	0	0	0	0	0	0	0	0	0	0	0	0	0	0	0	0	0	0	0
EIF2B3	0	0	0	0	0	0	0	0	0	0	0	0	0	0	0	0	0	0	1	0	0	0	0	0	0	0	0	0	0	0	0	0	0	0	0	0	0	0	0	0	0	0	0	0	0	0	0	0	0
AMY2A	0	0	0	0	0	0	0	0	0	0	0	0	0	0	0	0	0	0	1	0	0	0	0	0	0	0	0	0	0	0	0	0	0	0	0	0	0	0	0	0	0	0	0	0	0	0	0	0	0
S100A12	0	0	0	0	0	0	0	0	0	0	0	0	0	0	0	0	0	0	1	0	0	0	0	0	0	0	0	0	0	0	0	0	0	0	0	0	0	0	0	0	0	0	0	0	0	0	0	0	0
PTPN7	0	0	0	0	0	0	0	0	0	0	0	0	0	0	0	0	0	0	1	0	0	0	0	0	0	0	0	0	0	0	0	0	0	0	0	0	0	0	0	0	0	0	0	0	0	0	0	0	0
CFAP36	0	0	0	0	0	0	0	0	0	0	0	0	0	0	0	0	0	0	1	0	0	0	0	0	0	0	0	0	0	0	0	0	0	0	0	0	0	0	0	0	0	0	0	0	0	0	0	0	0
CWC22	0	0	0	0	0	0	0	0	0	0	0	0	0	0	0	0	0	0	1	0	0	0	0	0	0	0	0	0	0	0	0	0	0	0	0	0	0	0	0	0	0	0	0	0	0	0	0	0	0
MELTF	0	0	0	0	0	0	0	0	0	0	0	0	0	0	0	0	0	0	1	0	0	0	0	0	0	0	0	0	0	0	0	0	0	0	0	0	0	0	0	0	0	0	0	0	0	0	0	0	0
GRID2	0	0	0	0	0	0	0	0	0	0	0	0	0	0	0	0	0	0	1	0	0	0	0	0	0	0	0	0	0	0	0	0	0	0	0	0	0	0	0	0	0	0	0	0	0	0	0	0	0
CENPE	0	0	0	0	0	0	0	0	0	0	0	0	0	0	0	0	0	0	1	0	0	0	0	0	0	0	0	0	0	0	0	0	0	0	0	0	0	0	0	0	0	0	0	0	0	0	0	0	0
LAMA4	0	0	0	0	0	0	0	0	0	0	0	0	0	0	0	0	0	0	1	0	0	0	0	0	0	0	0	0	0	0	0	0	0	0	0	0	0	0	0	0	0	0	0	0	0	0	0	0	0
SCAF8	0	0	0	0	0	0	0	0	0	0	0	0	0	0	0	0	0	0	1	0	0	0	0	0	0	0	0	0	0	0	0	0	0	0	0	0	0	0	0	0	0	0	0	0	0	0	0	0	0
ELN	0	0	0	0	0	0	0	0	0	0	0	0	0	0	0	0	0	0	1	0	0	0	0	0	0	0	0	0	0	0	0	0	0	0	0	0	0	0	0	0	0	0	0	0	0	0	0	0	0
UHRF2	0	0	0	0	0	0	0	0	0	0	0	0	0	0	0	0	0	0	1	0	0	0	1	0	0	0	0	0	0	0	0	0	0	0	0	0	0	0	0	0	0	0	0	0	0	0	0	0	0
EGR2	0	0	0	0	0	0	0	0	0	0	0	0	0	0	0	0	0	0	1	0	0	0	0	0	0	0	0	0	0	0	0	0	0	0	0	0	0	0	0	0	0	0	0	0	0	0	0	0	0
CD44	0	0	0	0	0	0	0	0	0	0	0	0	0	0	0	0	0	0	1	0	0	0	0	0	0	0	0	0	0	0	0	0	0	0	0	0	0	0	0	0	0	0	0	0	0	0	0	0	0
SIK2	0	0	0	0	0	0	0	0	0	0	0	0	0	0	0	0	0	0	1	0	0	0	0	0	0	0	0	0	0	0	0	0	0	0	0	0	0	0	0	0	0	0	0	0	0	0	0	0	0
GUCY2C	0	0	0	0	0	0	0	0	0	0	0	0	0	0	0	0	0	0	1	0	0	0	0	0	0	0	0	0	0	0	0	0	0	0	0	0	0	0	0	0	0	0	0	0	0	0	0	0	0
FREM2	0	0	0	0	0	0	0	0	0	0	0	0	0	0	0	0	0	0	1	0	0	0	0	0	0	0	0	0	0	0	0	0	0	0	0	0	0	0	0	0	0	0	0	0	0	0	0	0	0
SOS2	0	0	0	0	0	0	0	0	0	0	0	0	0	0	0	0	0	0	1	0	0	0	0	0	0	0	0	0	0	0	0	0	0	0	0	0	0	0	0	0	0	0	0	0	0	0	0	0	0
KRT16	0	0	0	0	0	0	0	0	0	0	0	0	0	0	0	0	0	0	1	0	0	0	0	0	0	0	0	0	0	0	0	0	0	0	0	0	0	0	0	0	0	0	0	0	0	0	0	0	0
ASXL3	0	0	0	0	0	0	0	0	0	0	0	0	0	0	0	0	0	0	1	0	0	0	0	0	0	0	0	0	0	0	0	0	0	0	0	0	0	0	0	0	0	0	0	0	0	0	0	0	0
ZNF528	0	0	0	0	0	0	0	0	0	0	0	0	0	0	0	0	0	0	1	0	0	0	0	0	0	0	0	0	0	0	0	0	0	0	0	1	0	0	0	0	0	0	0	0	0	0	0	0	0
PEG3	0	0	0	0	0	0	0	0	0	0	0	0	0	0	0	0	0	0	1	0	0	0	0	0	0	0	0	0	0	0	0	0	0	0	0	0	0	0	0	0	1	0	0	0	0	0	0	0	0
NINL	0	0	0	0	0	0	0	0	0	0	0	0	0	0	0	0	0	0	1	0	0	0	0	0	0	0	0	0	0	0	0	0	0	0	0	0	0	0	0	0	0	0	0	0	0	0	0	0	0
ASXL1	0	0	0	0	0	0	0	0	0	0	0	0	0	0	0	0	0	0	1	0	0	0	0	0	0	0	0	0	0	0	0	0	0	0	0	0	0	0	0	0	0	0	0	0	0	0	0	0	0
MIOX	0	0	0	0	0	0	0	0	0	0	0	0	0	0	0	0	0	0	1	0	0	0	0	0	0	0	0	0	0	0	0	0	0	0	0	0	0	0	0	0	0	0	0	0	0	0	0	0	0
KDM5C	0	0	0	0	0	0	0	0	0	0	0	0	0	0	0	0	0	0	1	0	0	0	0	0	0	0	0	0	0	0	1	0	0	0	1	0	0	0	0	0	0	0	0	0	0	0	0	0	0
ARMCX5-GPRASP2	0	0	0	0	0	0	0	0	0	0	0	0	0	0	0	0	0	0	1	0	0	0	0	0	0	0	0	0	0	0	0	0	0	0	0	0	0	0	0	0	0	0	0	0	0	0	0	0	0
DMAP1	0	0	0	0	0	0	0	0	0	0	0	0	0	0	0	0	0	0	0	1	0	0	0	0	0	0	0	0	0	0	0	0	0	0	0	0	0	0	0	0	0	0	0	0	0	0	0	0	0
DDR2	0	0	0	0	0	0	0	0	0	0	0	0	0	0	0	0	0	0	0	1	0	0	0	0	0	0	0	0	0	0	0	0	0	0	0	0	0	0	0	0	0	0	0	0	0	0	0	0	0
CEP170	0	0	0	0	0	0	0	0	0	0	0	0	0	0	0	0	0	0	0	1	0	0	0	0	0	0	0	0	0	0	0	0	0	1	0	0	0	0	0	0	0	0	0	0	0	0	0	0	0
LNPK	0	0	0	0	0	0	0	0	0	0	0	0	0	0	0	0	0	0	0	1	0	0	0	0	0	0	0	0	0	0	0	0	0	0	0	0	0	0	0	0	0	0	0	0	0	0	0	0	0
LRRC2	0	0	0	0	0	0	0	0	0	0	0	0	0	0	0	0	0	0	0	1	0	0	0	0	0	0	0	0	0	0	0	0	0	0	0	0	0	0	0	0	0	0	0	0	0	0	0	0	0
IGSF10	0	0	0	0	0	0	0	0	0	0	0	0	0	0	0	0	0	0	0	1	0	0	0	0	0	0	0	0	0	0	0	0	0	0	0	0	0	0	0	0	0	0	0	0	0	0	0	0	0
ITPRID1	0	0	0	0	0	0	0	0	0	0	0	0	0	0	0	0	0	0	0	1	0	0	0	0	0	0	0	0	0	0	0	0	0	0	0	0	0	0	1	0	0	0	0	0	0	0	0	0	0
NDOR1	0	0	0	0	0	0	0	0	0	0	0	0	0	0	0	0	0	0	0	1	0	0	0	0	0	0	0	0	0	0	0	0	0	0	0	0	0	0	0	0	0	0	0	0	0	0	0	0	0
OR8B3	0	0	0	0	0	0	0	0	0	0	0	0	0	0	0	0	0	0	0	1	0	0	0	0	0	0	0	0	0	0	0	0	0	0	0	0	0	0	0	0	0	0	0	0	0	0	0	0	0
KCNJ1	0	0	0	0	0	0	0	0	0	0	0	0	0	0	0	0	0	0	0	1	0	0	0	0	0	0	0	0	0	0	0	0	0	0	0	0	0	0	0	0	0	0	0	0	0	0	0	0	0
NFRKB	0	0	0	0	0	0	0	0	0	0	0	0	0	0	0	0	0	0	0	1	0	0	0	0	0	0	0	0	0	0	0	0	0	0	0	0	0	0	0	0	0	0	0	0	0	0	0	0	0
DDX55	0	0	0	0	0	0	0	0	0	0	0	0	0	0	0	0	0	0	0	1	0	0	0	0	0	0	0	0	0	0	0	0	0	0	0	0	0	0	0	0	0	0	0	0	0	0	0	0	0
MOAP1	0	0	0	0	0	0	0	0	0	0	0	0	0	0	0	0	0	0	0	1	0	0	0	0	0	0	0	0	0	0	0	0	0	0	0	0	0	0	0	0	0	0	0	0	0	0	0	0	0
KNSTRN	0	0	0	0	0	0	0	0	0	0	0	0	0	0	0	0	0	0	0	1	0	0	0	0	0	0	0	0	0	0	0	0	0	0	0	0	0	0	0	0	0	0	0	0	0	0	0	0	0
SNX29	0	0	0	0	0	0	0	0	0	0	0	0	0	0	0	0	0	0	0	1	0	0	0	0	0	0	0	0	0	0	0	0	0	0	0	0	0	0	0	0	0	0	0	0	0	0	0	0	0
DHRS7C	0	0	0	0	0	0	0	0	0	0	0	0	0	0	0	0	0	0	0	1	0	0	0	0	0	0	0	0	0	0	0	0	0	0	0	0	0	0	0	0	0	0	0	0	0	0	0	0	0
MYH8	0	0	0	0	0	0	0	0	0	0	0	0	0	0	0	0	0	0	0	1	0	0	0	0	0	0	0	0	0	0	0	0	0	0	0	0	0	0	0	0	0	0	0	0	0	0	0	0	0
EFCAB3	0	0	0	0	0	0	0	0	0	0	0	0	0	0	0	0	0	0	0	1	0	0	0	0	0	0	0	0	0	0	0	0	0	0	0	0	0	0	0	0	0	0	0	0	0	0	0	0	0
RFX1	0	0	0	0	0	0	0	0	0	0	0	0	0	0	0	0	0	0	0	1	0	0	0	0	0	0	0	0	0	0	0	0	0	0	0	0	0	0	0	0	0	0	0	0	0	0	0	0	0
SLC1A5	0	0	0	0	0	0	0	0	0	0	0	0	0	0	0	0	0	0	0	1	0	0	0	0	0	0	0	0	0	0	0	0	0	0	0	0	0	0	0	0	0	0	0	0	0	0	0	0	0
ITSN1	0	0	0	0	0	0	0	0	0	0	0	0	0	0	0	0	0	0	0	1	0	0	0	0	0	0	0	0	0	0	0	0	0	0	0	0	0	0	0	0	0	0	0	0	0	0	0	0	0
CLCA4	0	0	0	0	0	0	0	0	0	0	0	0	0	0	0	0	0	0	0	0	1	0	0	0	0	0	0	0	0	0	0	0	0	0	0	0	0	0	0	0	0	0	0	0	0	0	0	0	0
SCAMP3	0	0	0	0	0	0	0	0	0	0	0	0	0	0	0	0	0	0	0	0	1	0	0	0	0	0	0	0	0	0	0	0	0	0	0	0	0	0	0	0	0	0	0	0	0	0	0	0	0
CNGA3	0	0	0	0	0	0	0	0	0	0	0	0	0	0	0	0	0	0	0	0	1	0	0	0	0	0	0	0	0	0	0	0	0	0	0	0	0	0	0	0	0	0	0	0	0	0	0	0	0
STAT4	0	0	0	0	0	0	0	0	0	0	0	0	0	0	0	0	0	0	0	0	1	0	0	0	0	0	0	0	0	0	0	0	0	0	0	0	0	0	0	0	0	0	0	0	0	0	0	0	0
LRRC66	0	0	0	0	0	0	0	0	0	0	0	0	0	0	0	0	0	0	0	0	1	0	0	0	0	0	0	0	0	0	0	0	0	0	0	0	0	0	0	0	0	0	0	0	0	0	0	0	0
C9	0	0	0	0	0	0	0	0	0	0	0	0	0	0	0	0	0	0	0	0	1	0	0	0	0	0	0	0	0	0	0	0	0	0	0	0	0	0	0	0	0	0	0	0	0	0	0	0	0
ZBED8	0	0	0	0	0	0	0	0	0	0	0	0	0	0	0	0	0	0	0	0	1	0	0	0	0	0	0	0	0	0	0	0	0	0	0	0	0	0	0	0	0	0	0	0	0	0	0	0	0
GTPBP4	0	0	0	0	0	0	0	0	0	0	0	0	0	0	0	0	0	0	0	0	1	0	0	0	0	0	0	0	0	0	0	0	0	0	0	0	0	0	0	0	0	0	0	0	0	0	0	0	0
NXF1	0	0	0	0	0	0	0	0	0	0	0	0	0	0	0	0	0	0	0	0	1	0	0	0	0	0	0	0	0	0	0	0	0	0	0	0	0	0	0	0	0	0	0	0	0	0	0	0	0
GRIK4	0	0	0	0	0	0	0	0	0	0	0	0	0	0	0	0	0	0	0	0	1	0	0	0	0	0	0	0	0	0	0	0	0	0	0	0	0	0	0	0	0	0	0	0	0	0	0	0	0
C1S	0	0	0	0	0	0	0	0	0	0	0	0	0	0	0	0	0	0	0	0	1	0	0	0	0	0	0	0	0	0	0	0	0	0	0	0	0	0	0	0	0	0	0	0	0	0	0	0	0
YARS2	0	0	0	0	0	0	0	0	0	0	0	0	0	0	0	0	0	0	0	0	1	0	0	0	0	0	0	0	0	0	0	0	0	0	0	0	0	0	0	0	0	0	0	0	0	0	0	0	0
PNP	0	0	0	0	0	0	0	0	0	0	0	0	0	0	0	0	0	0	0	0	1	0	0	0	0	0	0	0	0	0	0	0	0	0	0	0	0	0	0	0	0	0	0	0	0	0	0	0	0
TRIP11	0	0	0	0	0	0	0	0	0	0	0	0	0	0	0	0	0	0	0	0	1	0	0	0	0	0	0	0	0	0	0	0	0	0	0	0	0	0	0	0	0	0	0	0	0	0	0	0	0
ACLY	0	0	0	0	0	0	0	0	0	0	0	0	0	0	0	0	0	0	0	0	1	0	0	0	0	0	0	0	0	0	0	0	0	0	0	0	0	0	0	0	0	0	0	0	0	0	0	0	0
NIPAL3	0	0	0	0	0	0	0	0	0	0	0	0	0	0	0	0	0	0	0	0	0	1	0	0	0	0	0	0	0	0	0	0	0	0	0	0	0	0	0	0	0	0	0	0	0	0	0	0	0
SCN1A	0	0	0	0	0	0	0	0	0	0	0	0	0	0	0	0	0	0	0	0	0	1	0	0	0	0	0	0	0	0	0	0	0	0	0	0	0	1	0	0	0	0	0	0	0	0	0	0	0
DOCK10	0	0	0	0	0	0	0	0	0	0	0	0	0	0	0	0	0	0	0	0	0	1	0	0	0	0	0	0	0	0	0	0	0	0	0	0	0	0	0	0	0	0	0	0	0	0	0	0	0
ROBO2	0	0	0	0	0	0	0	0	0	0	0	0	0	0	0	0	0	0	0	0	0	1	0	0	0	0	0	0	0	0	0	0	0	0	0	0	0	0	0	0	0	0	0	0	0	0	0	0	0
DNAJC21	0	0	0	0	0	0	0	0	0	0	0	0	0	0	0	0	0	0	0	0	0	1	0	0	0	0	0	0	0	0	0	0	0	0	0	0	0	0	0	0	0	0	0	0	0	0	0	0	0
KIF2A	0	0	0	0	0	0	0	0	0	0	0	0	0	0	0	0	0	0	0	0	0	1	0	0	0	0	0	0	0	0	0	0	0	0	0	0	0	0	0	0	0	0	0	0	0	0	0	0	0
PCDHA12	0	0	0	0	0	0	0	0	0	0	0	0	0	0	0	0	0	0	0	0	0	1	0	0	0	0	0	0	0	0	0	0	0	0	0	0	0	0	0	0	0	0	0	0	0	0	0	0	0
RAB32	0	0	0	0	0	0	0	0	0	0	0	0	0	0	0	0	0	0	0	0	0	1	0	0	0	0	0	0	0	0	0	0	0	0	0	0	0	0	0	0	0	0	0	0	0	0	0	0	0
PRKDC	0	0	0	0	0	0	0	0	0	0	0	0	0	0	0	0	0	0	0	0	0	1	0	0	0	0	0	0	0	0	0	0	0	0	0	0	0	0	0	0	0	0	0	0	0	0	0	0	0
NCOA4	0	0	0	0	0	0	0	0	0	0	0	0	0	0	0	0	0	0	0	0	0	1	0	0	0	0	0	0	0	0	0	0	0	0	0	0	0	0	0	0	0	0	0	0	0	0	0	0	0
TRIM8	0	0	0	0	0	0	0	0	0	0	0	0	0	0	0	0	0	0	0	0	0	1	0	0	0	0	0	0	0	0	0	0	0	0	0	0	0	0	0	0	0	0	0	0	0	0	0	0	0
ADGRA1	0	0	0	0	0	0	0	0	0	0	0	0	0	0	0	0	0	0	0	0	0	1	0	0	0	0	0	0	0	0	0	0	0	0	0	0	0	0	0	0	0	0	0	0	0	0	0	0	0
ARID2	0	0	0	0	0	0	0	0	0	0	0	0	0	0	0	0	0	0	0	0	0	1	0	0	0	0	0	0	0	0	0	0	0	0	0	0	0	0	0	0	0	0	0	0	0	0	0	0	0
NALCN	0	0	0	0	0	0	0	0	0	0	0	0	0	0	0	0	0	0	0	0	0	1	0	0	0	0	0	0	0	0	0	0	0	0	0	0	0	0	0	0	0	0	0	0	0	0	0	0	0
IPO4	0	0	0	0	0	0	0	0	0	0	0	0	0	0	0	0	0	0	0	0	0	1	0	0	0	0	0	0	0	0	0	0	0	0	0	0	0	0	0	0	0	0	0	0	0	0	0	0	0
RASGRF1	0	0	0	0	0	0	0	0	0	0	0	0	0	0	0	0	0	0	0	0	0	1	0	0	0	0	0	0	0	0	0	0	0	0	0	0	0	0	0	0	0	0	0	0	0	0	0	0	0
AP3S2	0	0	0	0	0	0	0	0	0	0	0	0	0	0	0	0	0	0	0	0	0	1	0	0	0	0	0	0	0	0	0	0	0	0	0	0	0	0	0	0	0	0	0	0	0	0	0	0	0
NATD1	0	0	0	0	0	0	0	0	0	0	0	0	0	0	0	0	0	0	0	0	0	1	0	0	0	0	0	0	0	0	0	0	0	0	0	0	0	0	0	0	0	0	0	0	0	0	0	0	0
ADAMTSL5	0	0	0	0	0	0	0	0	0	0	0	0	0	0	0	0	0	0	0	0	0	1	0	0	0	0	1	0	0	0	0	0	0	0	0	0	0	0	0	0	0	0	0	0	0	0	0	0	0
ZNF77	0	0	0	0	0	0	0	0	0	0	0	0	0	0	0	0	0	0	0	0	0	1	0	0	0	0	0	0	0	0	0	0	0	0	0	0	0	0	0	0	0	0	0	0	0	0	0	0	0
TLE6	0	0	0	0	0	0	0	0	0	0	0	0	0	0	0	0	0	0	0	0	0	1	0	0	0	0	0	0	0	0	0	0	0	0	0	0	0	0	0	0	0	0	0	0	0	0	0	0	0
ANO8	0	0	0	0	0	0	0	0	0	0	0	0	0	0	0	0	0	0	0	0	0	1	0	0	0	0	0	0	0	0	0	0	0	0	0	0	0	0	0	0	0	0	0	0	0	0	0	0	0
SYT3	0	0	0	0	0	0	0	0	0	0	0	0	0	0	0	0	0	0	0	0	0	1	0	0	0	0	0	0	0	0	0	0	0	0	0	0	0	0	0	0	0	0	0	0	0	0	0	0	0
EIF2S2	0	0	0	0	0	0	0	0	0	0	0	0	0	0	0	0	0	0	0	0	0	1	0	0	0	0	0	0	0	0	0	0	0	0	0	0	0	0	0	0	0	0	0	0	0	0	0	0	0
LIPI	0	0	0	0	0	0	0	0	0	0	0	0	0	0	0	0	0	0	0	0	0	1	0	0	0	0	0	0	0	0	0	0	0	0	0	0	0	0	0	0	0	0	0	0	0	0	0	0	0
CLIC6	0	0	0	0	0	0	0	0	0	0	0	0	0	0	0	0	0	0	0	0	0	1	0	0	0	0	0	0	0	0	0	0	0	0	0	0	0	0	0	0	0	0	0	0	0	0	0	0	0
IGLC2	0	0	0	0	0	0	0	0	0	0	0	0	0	0	0	0	0	0	0	0	0	1	0	0	0	0	0	0	0	0	0	0	0	0	0	0	0	0	0	1	0	0	0	0	0	0	0	0	0
OSBP2	0	0	0	0	0	0	0	0	0	0	0	0	0	0	0	0	0	0	0	0	0	1	0	0	0	0	0	0	0	0	0	0	0	0	0	0	0	0	0	0	0	0	0	0	0	0	0	0	0
LUZP1	0	0	0	0	0	0	0	0	0	0	0	0	0	0	0	0	0	0	0	0	0	0	1	0	0	0	0	0	0	0	0	0	0	0	0	0	0	0	0	0	0	0	0	0	0	0	0	0	0
SZT2	0	0	0	0	0	0	0	0	0	0	0	0	0	0	0	0	0	0	0	0	0	0	1	0	0	0	0	0	0	0	0	0	0	0	0	0	0	0	0	0	0	0	0	0	0	0	0	0	0
CYP2J2	0	0	0	0	0	0	0	0	0	0	0	0	0	0	0	0	0	0	0	0	0	0	1	0	0	0	0	0	0	0	0	0	0	0	0	0	0	0	0	0	0	0	0	0	0	0	0	0	0
NUP210L	0	0	0	0	0	0	0	0	0	0	0	0	0	0	0	0	0	0	0	0	0	0	1	0	0	0	0	0	0	0	0	0	0	0	0	0	0	0	0	0	0	0	0	0	0	0	0	0	1
EFNA1	0	0	0	0	0	0	0	0	0	0	0	0	0	0	0	0	0	0	0	0	0	0	1	0	0	0	0	0	0	0	0	0	0	0	0	0	0	0	0	0	0	0	0	0	0	0	0	0	0
TAF5L	0	0	0	0	0	0	0	0	0	0	0	0	0	0	0	0	0	0	0	0	0	0	1	0	0	0	0	0	0	0	0	0	0	0	0	0	0	0	0	0	0	0	0	0	0	0	0	0	0
POTEE	0	0	0	0	0	0	0	0	0	0	0	0	0	0	0	0	0	0	0	0	0	0	1	0	0	0	0	0	0	0	0	0	0	0	0	0	0	0	0	0	0	0	0	0	0	0	0	0	0
SCN9A	0	0	0	0	0	0	0	0	0	0	0	0	0	0	0	0	0	0	0	0	0	0	1	0	0	0	0	0	0	0	0	0	0	0	0	0	0	0	0	0	0	0	0	0	0	0	0	0	0
NHEJ1	0	0	0	0	0	0	0	0	0	0	0	0	0	0	0	0	0	0	0	0	0	0	1	0	0	0	0	0	0	0	0	0	0	0	0	0	0	0	0	0	0	0	0	0	0	0	0	0	0
LAMB2	0	0	0	0	0	0	0	0	0	0	0	0	0	0	0	0	0	0	0	0	0	0	1	0	0	0	0	0	0	0	0	0	0	0	0	0	0	0	0	0	0	0	0	0	0	0	0	0	0
HSPA4L	0	0	0	0	0	0	0	0	0	0	0	0	0	0	0	0	0	0	0	0	0	0	1	0	0	0	0	0	0	0	0	0	0	0	0	0	0	0	0	0	0	0	0	0	0	0	0	0	0
MCC	0	0	0	0	0	0	0	0	0	0	0	0	0	0	0	0	0	0	0	0	0	0	1	0	0	0	0	0	0	0	0	0	0	0	0	0	0	0	0	0	0	0	0	0	0	0	0	0	0
YTHDC2	0	0	0	0	0	0	0	0	0	0	0	0	0	0	0	0	0	0	0	0	0	0	1	0	0	0	0	0	0	0	0	0	0	0	0	0	0	0	0	0	0	0	0	0	0	0	0	0	0
DOCK2	0	0	0	0	0	0	0	0	0	0	0	0	0	0	0	0	0	0	0	0	0	0	1	0	0	0	0	0	0	0	0	0	0	0	0	0	0	0	0	0	1	0	0	0	0	0	0	0	0
SKIV2L	0	0	0	0	0	0	0	0	0	0	0	0	0	0	0	0	0	0	0	0	0	0	1	0	0	0	0	0	0	0	0	0	0	0	0	0	0	0	0	0	0	0	0	0	0	0	0	0	0
FAM184A	0	0	0	0	0	0	0	0	0	0	0	0	0	0	0	0	0	0	0	0	0	0	1	0	0	0	0	0	0	0	0	0	0	0	0	0	0	0	0	0	0	0	0	0	0	0	0	0	0
POT1	0	0	0	0	0	0	0	0	0	0	0	0	0	0	0	0	0	0	0	0	0	0	1	0	0	0	0	0	0	0	0	0	0	0	0	0	0	0	0	0	0	0	0	0	0	0	0	0	0
CNTNAP3	0	0	0	0	0	0	0	0	0	0	0	0	0	0	0	0	0	0	0	0	0	0	1	0	0	0	0	0	0	0	0	0	0	0	0	0	0	0	1	0	0	0	0	0	0	0	0	0	0
ZNF483	0	0	0	0	0	0	0	0	0	0	0	0	0	0	0	0	0	0	0	0	0	0	1	0	0	0	0	0	0	0	0	0	0	0	0	0	0	0	0	0	0	0	0	0	0	0	0	0	0
DDX50	0	0	0	0	0	0	0	0	0	0	0	0	0	0	0	0	0	0	0	0	0	0	1	0	0	0	0	0	0	0	0	0	0	0	0	0	0	0	0	0	0	0	0	0	0	0	0	0	0
NKX2-3	0	0	0	0	0	0	0	0	0	0	0	0	0	0	0	0	0	0	0	0	0	0	1	0	0	0	0	0	0	0	0	0	0	0	0	0	0	0	0	0	0	0	0	0	0	0	0	0	0
CAPRIN2	0	0	0	0	0	0	0	0	0	0	0	0	0	0	0	0	0	0	0	0	0	0	1	0	0	0	0	0	0	0	0	0	0	0	0	0	0	0	0	0	0	0	0	0	0	0	0	0	0
ACVR1B	0	0	0	0	0	0	0	0	0	0	0	0	0	0	0	0	0	0	0	0	0	0	1	0	0	0	0	0	0	0	0	0	0	0	0	0	0	0	0	0	0	0	0	0	0	0	0	0	0
OR10A7	0	0	0	0	0	0	0	0	0	0	0	0	0	0	0	0	0	0	0	0	0	0	1	0	0	0	0	0	0	0	0	0	0	0	0	0	0	0	0	0	0	0	0	0	0	0	0	0	0
SLC5A8	0	0	0	0	0	0	0	0	0	0	0	0	0	0	0	0	0	0	0	0	0	0	1	0	0	0	0	0	0	0	0	0	0	0	0	0	0	0	0	0	0	0	0	0	0	0	0	0	0
GTF2A2	0	0	0	0	0	0	0	0	0	0	0	0	0	0	0	0	0	0	0	0	0	0	1	0	0	0	0	0	0	0	0	0	0	0	0	0	0	0	0	0	0	0	0	0	0	0	0	0	0
AKAP13	0	0	0	0	0	0	0	0	0	0	0	0	0	0	0	0	0	0	0	0	0	0	1	0	0	0	0	0	0	0	0	0	0	0	0	0	0	0	0	0	0	0	0	0	0	0	0	0	0
HROB	0	0	0	0	0	0	0	0	0	0	0	0	0	0	0	0	0	0	0	0	0	0	1	0	0	0	0	0	0	0	0	0	0	0	0	0	0	0	0	0	0	0	0	0	0	0	0	0	0
C17orf80	0	0	0	0	0	0	0	0	0	0	0	0	0	0	0	0	0	0	0	0	0	0	1	0	0	0	0	0	0	0	0	0	0	0	0	0	0	0	0	0	0	0	0	0	0	0	0	0	0
OR10H4	0	0	0	0	0	0	0	0	0	0	0	0	0	0	0	0	0	0	0	0	0	0	1	0	0	0	0	0	0	0	0	0	0	0	0	0	0	0	0	0	0	0	0	0	0	0	0	0	0
CPAMD8	0	0	0	0	0	0	0	0	0	0	0	0	0	0	0	0	0	0	0	0	0	0	1	0	0	0	0	0	0	0	0	0	0	0	0	0	0	0	0	0	0	0	0	0	0	0	0	0	0
ZNF91	0	0	0	0	0	0	0	0	0	0	0	0	0	0	0	0	0	0	0	0	0	0	1	0	0	0	0	0	0	0	0	0	0	0	0	0	0	0	0	0	0	0	0	0	0	0	0	0	0
FAM47B	0	0	0	0	0	0	0	0	0	0	0	0	0	0	0	0	0	0	0	0	0	0	1	0	0	0	0	0	0	0	0	0	0	0	0	0	0	0	0	0	0	0	0	0	0	0	0	0	0
COL4A6	0	0	0	0	0	0	0	0	0	0	0	0	0	0	0	0	0	0	0	0	0	0	1	0	0	0	0	0	0	0	0	0	0	0	0	0	0	0	0	0	0	0	0	0	0	0	0	0	0
RER1	0	0	0	0	0	0	0	0	0	0	0	0	0	0	0	0	0	0	0	0	0	0	0	1	0	0	0	0	0	0	0	0	0	0	0	0	0	0	0	0	0	0	0	0	0	0	0	0	0
ARID1A	0	0	0	0	0	0	0	0	0	0	0	0	0	0	0	0	0	0	0	0	0	0	0	1	0	0	0	0	0	0	0	0	0	0	0	0	0	0	0	0	0	0	0	0	0	0	0	0	0
GON4L	0	0	0	0	0	0	0	0	0	0	0	0	0	0	0	0	0	0	0	0	0	0	0	1	0	0	0	0	0	0	0	0	0	0	0	0	0	0	0	0	0	0	0	0	0	0	0	0	0
FMOD	0	0	0	0	0	0	0	0	0	0	0	0	0	0	0	0	0	0	0	0	0	0	0	1	0	0	0	0	0	0	0	0	0	0	0	0	0	0	0	0	0	0	0	0	0	0	0	0	0
TMEM169	0	0	0	0	0	0	0	0	0	0	0	0	0	0	0	0	0	0	0	0	0	0	0	1	0	0	0	0	0	0	0	0	0	0	0	0	0	0	0	0	0	0	0	0	0	0	0	0	0
GPR62	0	0	0	0	0	0	0	0	0	0	0	0	0	0	0	0	0	0	0	0	0	0	0	1	0	0	0	0	0	0	0	0	0	0	0	0	0	0	0	0	0	0	0	0	0	0	0	0	0
KBTBD8	0	0	0	0	0	0	0	0	0	0	0	0	0	0	0	0	0	0	0	0	0	0	0	1	0	0	0	0	0	0	0	0	0	0	0	0	0	0	0	0	0	0	0	0	0	0	0	0	0
C3orf38	0	0	0	0	0	0	0	0	0	0	0	0	0	0	0	0	0	0	0	0	0	0	0	1	0	0	0	0	0	0	0	0	0	0	0	0	0	0	0	0	0	0	0	0	0	0	0	0	0
HGD	0	0	0	0	0	0	0	0	0	0	0	0	0	0	0	0	0	0	0	0	0	0	0	1	0	0	0	0	0	0	0	0	0	0	0	0	0	0	0	0	0	0	0	0	0	0	0	0	0
ADCY5	0	0	0	0	0	0	0	0	0	0	0	0	0	0	0	0	0	0	0	0	0	0	0	1	0	0	0	0	0	0	0	0	0	0	0	0	0	0	0	0	0	0	0	0	0	0	0	0	0
TOPBP1	0	0	0	0	0	0	0	0	0	0	0	0	0	0	0	0	0	0	0	0	0	0	0	1	0	0	0	0	0	0	0	0	0	0	0	0	0	0	0	0	0	0	0	0	0	0	0	0	0
PLD1	0	0	0	0	0	0	0	0	0	0	0	0	0	0	0	0	0	0	0	0	0	0	0	1	0	0	0	0	0	0	0	0	0	0	0	0	0	0	0	0	0	0	0	0	0	0	0	0	0
KNG1	0	0	0	0	0	0	0	0	0	0	0	0	0	0	0	0	0	0	0	0	0	0	0	1	0	0	0	0	0	0	0	1	0	0	0	0	0	0	0	0	0	0	0	0	0	0	0	0	0
BCL6	0	0	0	0	0	0	0	0	0	0	0	0	0	0	0	0	0	0	0	0	0	0	0	1	0	0	0	0	0	0	0	0	0	0	0	0	0	0	0	0	0	0	0	0	0	0	0	0	0
THAP9	0	0	0	0	0	0	0	0	0	0	0	0	0	0	0	0	0	0	0	0	0	0	0	1	0	0	0	0	0	0	0	0	0	0	0	0	0	0	0	0	0	0	0	0	0	0	0	0	0
MAPK10	0	0	0	0	0	0	0	0	0	0	0	0	0	0	0	0	0	0	0	0	0	0	0	1	0	0	0	0	0	0	0	0	0	0	0	0	0	0	0	0	0	0	0	0	0	0	0	0	0
TLL1	0	0	0	0	0	0	0	0	0	0	0	0	0	0	0	0	0	0	0	0	0	0	0	1	0	0	0	0	0	0	0	0	0	0	0	0	0	0	0	0	0	0	0	0	0	0	0	0	0
PDZD2	0	0	0	0	0	0	0	0	0	0	0	0	0	0	0	0	0	0	0	0	0	0	0	1	0	0	0	0	0	0	0	0	0	0	0	0	0	0	0	0	0	0	0	0	0	0	0	0	0
SLCO4C1	0	0	0	0	0	0	0	0	0	0	0	0	0	0	0	0	0	0	0	0	0	0	0	1	0	0	0	0	0	0	0	0	0	0	0	0	0	0	0	0	0	0	0	0	0	0	0	0	0
RNF145	0	0	0	0	0	0	0	0	0	0	0	0	0	0	0	0	0	0	0	0	0	0	0	1	0	0	0	0	0	0	0	0	0	0	0	0	0	0	0	0	0	0	0	0	0	0	0	0	0
RAB24	0	0	0	0	0	0	0	0	0	0	0	0	0	0	0	0	0	0	0	0	0	0	0	1	0	0	0	0	0	0	0	0	0	0	0	0	0	0	0	0	0	0	0	0	0	0	0	0	0
HNRNPH1	0	0	0	0	0	0	0	0	0	0	0	0	0	0	0	0	0	0	0	0	0	0	0	1	0	0	0	0	0	0	0	0	0	0	0	0	0	0	0	0	0	0	0	0	0	0	0	0	0
CUL7	0	0	0	0	0	0	0	0	0	0	0	0	0	0	0	0	0	0	0	0	0	0	0	1	0	0	0	0	0	0	0	0	0	0	0	0	0	0	0	0	0	0	0	0	0	0	0	0	0
CRIP3	0	0	0	0	0	0	0	0	0	0	0	0	0	0	0	0	0	0	0	0	0	0	0	1	0	0	0	0	0	0	0	0	0	0	0	0	0	0	0	0	0	0	0	0	0	0	0	0	0
PAQR8	0	0	0	0	0	0	0	0	0	0	0	0	0	0	0	0	0	0	0	0	0	0	0	1	0	0	0	0	0	0	0	0	0	0	0	0	0	0	0	0	0	0	0	0	0	0	0	0	0
FAM83B	0	0	0	0	0	0	0	0	0	0	0	0	0	0	0	0	0	0	0	0	0	0	0	1	0	0	1	0	0	0	0	0	0	0	0	0	0	0	0	0	0	0	0	0	0	0	0	0	0
UBE2J1	0	0	0	0	0	0	0	0	0	0	0	0	0	0	0	0	0	0	0	0	0	0	0	1	0	0	0	0	0	0	0	0	0	0	0	0	0	0	0	0	0	0	0	0	0	0	0	0	0
MARCKS	0	0	0	0	0	0	0	0	0	0	0	0	0	0	0	0	0	0	0	0	0	0	0	1	0	0	0	0	0	0	0	0	0	0	0	0	0	0	0	0	0	0	0	0	0	0	0	0	0
CHST12	0	0	0	0	0	0	0	0	0	0	0	0	0	0	0	0	0	0	0	0	0	0	0	1	0	0	0	0	0	0	0	0	0	0	0	0	0	0	0	0	0	0	0	0	0	0	0	0	0
EGFR	0	0	0	0	0	0	0	0	0	0	0	0	0	0	0	0	0	0	0	0	0	0	0	1	0	0	0	0	0	0	0	0	0	0	0	0	0	0	0	0	0	0	0	0	0	0	0	0	0
LIMK1	0	0	0	0	0	0	0	0	0	0	0	0	0	0	0	0	0	0	0	0	0	0	0	1	0	0	0	0	0	0	0	0	0	0	0	0	0	0	0	0	0	0	0	0	0	0	0	0	0
SDHAF3	0	0	0	0	0	0	0	0	0	0	0	0	0	0	0	0	0	0	0	0	0	0	0	1	0	0	0	0	0	0	0	0	0	0	0	0	0	0	0	0	0	0	0	0	0	0	0	0	0
TNKS	0	0	0	0	0	0	0	0	0	0	0	0	0	0	0	0	0	0	0	0	0	0	0	1	0	0	0	0	0	0	0	0	0	0	0	0	0	0	1	0	0	0	0	0	0	0	0	0	0
PXDNL	0	0	0	0	0	0	0	0	0	0	0	0	0	0	0	0	0	0	0	0	0	0	0	1	0	0	0	0	0	0	0	0	0	0	0	0	0	0	0	0	0	0	0	0	0	0	0	0	0
LRRCC1	0	0	0	0	0	0	0	0	0	0	0	0	0	0	0	0	0	0	0	0	0	0	0	1	0	0	0	0	0	0	0	0	0	0	0	0	0	0	0	0	0	0	0	0	1	0	0	0	0
LRP12	0	0	0	0	0	0	0	0	0	0	0	0	0	0	0	0	0	0	0	0	0	0	0	1	0	0	0	0	0	0	0	0	0	0	0	0	0	0	0	0	0	0	0	0	0	0	0	0	0
NOL6	0	0	0	0	0	0	0	0	0	0	0	0	0	0	0	0	0	0	0	0	0	0	0	1	0	0	0	0	0	0	0	0	0	0	0	0	0	0	0	0	0	0	0	0	0	0	0	0	0
TPM2	0	0	0	0	0	0	0	0	0	0	0	0	0	0	0	0	0	0	0	0	0	0	0	1	0	0	0	0	0	0	0	0	0	0	0	0	0	0	0	0	0	0	0	0	0	0	0	0	0
SVEP1	0	0	0	0	0	0	0	0	0	0	0	0	0	0	0	0	0	0	0	0	0	0	0	1	0	0	0	0	0	0	0	0	0	0	0	0	0	0	0	0	0	0	0	0	0	0	0	0	0
MCU	0	0	0	0	0	0	0	0	0	0	0	0	0	0	0	0	0	0	0	0	0	0	0	1	0	0	0	0	0	0	0	0	0	0	0	0	0	0	0	0	0	0	0	0	0	0	0	0	0
CFAP43	0	0	0	0	0	0	0	0	0	0	0	0	0	0	0	0	0	0	0	0	0	0	0	1	0	0	0	0	0	0	0	0	0	0	0	0	0	0	0	0	0	0	0	0	0	0	0	0	0
PLEKHA1	0	0	0	0	0	0	0	0	0	0	0	0	0	0	0	0	0	0	0	0	0	0	0	1	0	0	0	0	0	0	0	0	0	0	0	0	0	0	0	0	0	0	0	0	0	0	0	0	0
CDHR5	0	0	0	0	0	0	0	0	0	0	0	0	0	0	0	0	0	0	0	0	0	0	0	1	0	0	0	0	0	0	0	0	0	0	0	0	0	0	0	0	0	0	0	0	0	0	0	0	0
API5	0	0	0	0	0	0	0	0	0	0	0	0	0	0	0	0	0	0	0	0	0	0	0	1	0	0	0	0	0	0	0	0	0	0	0	0	0	0	0	0	0	0	0	0	0	0	0	0	0
ATG13	0	0	0	0	0	0	0	0	0	0	0	0	0	0	0	0	0	0	0	0	0	0	0	1	0	0	0	0	0	0	0	0	0	0	0	0	0	0	0	0	0	0	0	0	0	0	0	0	0
FGF3	0	0	0	0	0	0	0	0	0	0	0	0	0	0	0	0	0	0	0	0	0	0	0	1	0	0	0	0	0	0	0	0	0	0	0	0	0	0	0	0	0	0	0	0	0	0	0	0	0
TAS2R42	0	0	0	0	0	0	0	0	0	0	0	0	0	0	0	0	0	0	0	0	0	0	0	1	0	0	0	0	0	0	0	0	0	0	0	0	0	0	0	0	0	0	0	0	0	0	0	0	0
STAB2	0	0	0	0	0	0	0	0	0	0	0	0	0	0	0	0	0	0	0	0	0	0	0	1	0	0	0	0	0	0	0	0	0	0	0	0	0	0	0	0	0	0	0	0	0	0	0	0	0
RPLP0	0	0	0	0	0	0	0	0	0	0	0	0	0	0	0	0	0	0	0	0	0	0	0	1	0	0	0	0	0	0	0	0	0	0	0	0	0	0	0	0	0	0	0	0	0	0	0	0	0
GPC5	0	0	0	0	0	0	0	0	0	0	0	0	0	0	0	0	0	0	0	0	0	0	0	1	0	0	0	0	0	0	0	0	0	0	0	0	0	0	0	0	0	0	0	0	0	0	0	0	0
TM9SF2	0	0	0	0	0	0	0	0	0	0	0	0	0	0	0	0	0	0	0	0	0	0	0	1	0	0	0	0	0	0	0	0	0	0	0	0	0	0	0	0	0	0	0	0	0	0	0	0	0
OXA1L	0	0	0	0	0	0	0	0	0	0	0	0	0	0	0	0	0	0	0	0	0	0	0	1	0	0	0	0	0	0	0	0	0	0	0	0	0	0	0	0	0	0	0	0	0	0	0	0	0
IRF9	0	0	0	0	0	0	0	0	0	0	0	0	0	0	0	0	0	0	0	0	0	0	0	1	0	0	0	0	0	0	0	0	0	0	0	0	0	0	0	0	0	0	0	0	0	0	0	0	0
SIPA1L1	0	0	0	0	0	0	0	0	0	0	0	0	0	0	0	0	0	0	0	0	0	0	0	1	0	0	0	0	0	0	0	0	0	0	0	0	0	0	0	0	0	0	0	0	0	0	0	0	0
MIDEAS	0	0	0	0	0	0	0	0	0	0	0	0	0	0	0	0	0	0	0	0	0	0	0	1	0	0	0	0	0	0	0	0	0	0	0	0	0	0	0	0	0	0	0	0	0	0	0	0	0
OTUB2	0	0	0	0	0	0	0	0	0	0	0	0	0	0	0	0	0	0	0	0	0	0	0	1	0	0	0	0	0	0	0	0	0	0	0	0	0	0	0	0	0	0	0	0	0	0	0	0	0
SERPINA12	0	0	0	0	0	0	0	0	0	0	0	0	0	0	0	0	0	0	0	0	0	0	0	1	0	0	0	0	0	0	0	0	0	0	0	0	0	0	0	0	0	0	0	0	0	0	0	0	0
SPG21	0	0	0	0	0	0	0	0	0	0	0	0	0	0	0	0	0	0	0	0	0	0	0	1	0	0	0	0	0	0	0	0	0	0	0	0	0	0	0	1	0	0	0	0	0	0	0	0	0
SPESP1	0	0	0	0	0	0	0	0	0	0	0	0	0	0	0	0	0	0	0	0	0	0	0	1	0	0	0	0	0	0	0	0	0	0	0	0	0	0	0	0	0	0	0	0	0	0	0	0	0
HCN4	0	0	0	0	0	0	0	0	0	0	0	0	0	0	0	0	0	0	0	0	0	0	0	1	0	0	0	0	0	0	0	0	0	0	0	0	0	0	0	0	0	0	0	0	0	0	0	0	0
RAB11FIP3	0	0	0	0	0	0	0	0	0	0	0	0	0	0	0	0	0	0	0	0	0	0	0	1	0	0	0	0	0	0	0	0	0	0	0	0	0	0	0	0	0	0	0	0	0	0	0	0	0
TMC5	0	0	0	0	0	0	0	0	0	0	0	0	0	0	0	0	0	0	0	0	0	0	0	1	0	0	0	0	0	0	0	0	0	0	0	0	0	0	0	0	0	0	0	0	0	0	0	0	0
ITGAL	0	0	0	0	0	0	0	0	0	0	0	0	0	0	0	0	0	0	0	0	0	0	0	1	0	0	0	0	0	0	0	0	0	0	0	0	0	0	0	0	0	0	0	0	0	0	0	0	0
ACD	0	0	0	0	0	0	0	0	0	0	0	0	0	0	0	0	0	0	0	0	0	0	0	1	0	0	0	0	0	0	0	0	0	0	0	0	0	0	0	0	0	0	0	0	0	0	0	0	0
MLYCD	0	0	0	0	0	0	0	0	0	0	0	0	0	0	0	0	0	0	0	0	0	0	0	1	0	0	0	0	0	0	0	0	0	0	0	0	0	0	0	0	0	0	0	0	0	0	0	0	0
RPH3AL	0	0	0	0	0	0	0	0	0	0	0	0	0	0	0	0	0	0	0	0	0	0	0	1	0	0	0	0	0	0	0	0	0	0	0	0	0	0	0	0	0	0	0	0	0	0	0	0	0
EFTUD2	0	0	0	0	0	0	0	0	0	0	0	0	0	0	0	0	0	0	0	0	0	0	0	1	0	0	0	0	0	0	0	0	0	0	0	0	0	0	0	0	0	0	0	0	0	0	0	0	0
SPATA32	0	0	0	0	0	0	0	0	0	0	0	0	0	0	0	0	0	0	0	0	0	0	0	1	0	0	0	0	0	0	0	0	0	0	0	0	0	0	0	0	0	0	0	0	0	0	0	0	0
CEP95	0	0	0	0	0	0	0	0	0	0	0	0	0	0	0	0	0	0	0	0	0	0	0	1	0	0	0	0	0	0	0	0	0	0	0	0	0	0	0	0	0	0	0	0	0	0	0	0	0
DNAH17	0	0	0	0	0	0	0	0	0	0	0	0	0	0	0	0	0	0	0	0	0	0	0	1	0	0	0	0	0	0	0	0	0	0	0	0	0	0	0	0	0	0	0	0	0	0	0	0	0
SLC26A11	0	0	0	0	0	0	0	0	0	0	0	0	0	0	0	0	0	0	0	0	0	0	0	1	0	0	0	0	0	0	0	0	0	0	0	0	0	0	0	0	0	0	0	0	0	0	0	0	0
TRAPPC8	0	0	0	0	0	0	0	0	0	0	0	0	0	0	0	0	0	0	0	0	0	0	0	1	0	0	0	0	0	0	0	0	0	0	0	0	0	0	0	0	0	0	0	0	0	0	0	1	0
TCF3	0	0	0	0	0	0	0	0	0	0	0	0	0	0	0	0	0	0	0	0	0	0	0	1	0	0	0	0	0	0	0	0	0	0	0	0	0	0	0	0	0	0	0	0	0	0	0	0	0
ZNF226	0	0	0	0	0	0	0	0	0	0	0	0	0	0	0	0	0	0	0	0	0	0	0	1	0	0	0	0	0	0	0	0	0	0	0	0	0	0	0	0	0	0	0	0	0	0	0	0	0
KLK6	0	0	0	0	0	0	0	0	0	0	0	0	0	0	0	0	0	0	0	0	0	0	0	1	0	0	0	0	0	0	0	0	0	0	0	0	0	0	0	0	0	0	0	0	0	0	0	0	0
ZNF761	0	0	0	0	0	0	0	0	0	0	0	0	0	0	0	0	0	0	0	0	0	0	0	1	0	0	0	0	0	0	0	0	0	0	0	0	0	0	0	0	0	0	0	0	0	0	0	0	0
SNRPB	0	0	0	0	0	0	0	0	0	0	0	0	0	0	0	0	0	0	0	0	0	0	0	1	0	0	0	0	0	0	0	0	0	0	0	0	0	0	0	0	0	0	0	0	0	0	0	0	0
PRNP	0	0	0	0	0	0	0	0	0	0	0	0	0	0	0	0	0	0	0	0	0	0	0	1	0	0	0	0	0	0	0	0	0	0	0	0	0	0	0	0	0	0	0	0	0	0	0	0	0
MAGEB10	0	0	0	0	0	0	0	0	0	0	0	0	0	0	0	0	0	0	0	0	0	0	0	1	0	0	0	0	0	0	0	0	0	0	0	0	0	0	0	0	0	0	0	0	0	0	0	0	0
ATRX	0	0	0	0	0	0	0	0	0	0	0	0	0	0	0	0	0	0	0	0	0	0	0	1	0	0	0	0	1	0	0	0	0	0	0	0	0	0	0	0	1	0	0	0	0	0	0	0	0
ZNF185	0	0	0	0	0	0	0	0	0	0	0	0	0	0	0	0	0	0	0	0	0	0	0	1	0	0	0	0	0	0	0	0	0	0	0	0	0	0	0	0	0	0	0	0	0	0	0	0	0
CACNA1S	0	0	0	0	0	0	0	0	0	0	0	0	0	0	0	0	0	0	0	0	0	0	0	0	1	0	0	0	0	0	0	0	0	0	0	0	0	0	0	0	0	0	0	0	0	0	0	0	0
ZNF669	0	0	0	0	0	0	0	0	0	0	0	0	0	0	0	0	0	0	0	0	0	0	0	0	1	0	0	0	0	0	0	0	0	0	0	0	0	0	0	0	0	0	0	0	0	0	0	0	0
NLRC4	0	0	0	0	0	0	0	0	0	0	0	0	0	0	0	0	0	0	0	0	0	0	0	0	1	0	0	0	0	0	0	0	0	0	0	0	0	0	0	0	0	0	0	0	0	0	0	0	0
PHC3	0	0	0	0	0	0	0	0	0	0	0	0	0	0	0	0	0	0	0	0	0	0	0	0	1	0	0	0	0	0	0	0	0	0	0	0	0	0	0	0	0	0	0	0	0	0	0	0	0
PEX5L	0	0	0	0	0	0	0	0	0	0	0	0	0	0	0	0	0	0	0	0	0	0	0	0	1	0	0	0	0	0	0	0	0	0	0	0	0	0	0	0	0	0	0	0	0	0	0	0	0
ZNF721	0	0	0	0	0	0	0	0	0	0	0	0	0	0	0	0	0	0	0	0	0	0	0	0	1	0	0	0	0	0	0	0	0	0	0	0	0	0	0	0	0	0	0	0	0	0	0	0	0
KIAA0232	0	0	0	0	0	0	0	0	0	0	0	0	0	0	0	0	0	0	0	0	0	0	0	0	1	0	0	0	0	0	0	0	0	0	0	0	0	0	0	0	0	0	0	0	0	0	0	0	0
ZNF518B	0	0	0	0	0	0	0	0	0	0	0	0	0	0	0	0	0	0	0	0	0	0	0	0	1	0	0	0	0	0	0	0	0	0	0	0	0	0	0	0	0	0	0	0	0	0	0	0	0
HSPA9	0	0	0	0	0	0	0	0	0	0	0	0	0	0	0	0	0	0	0	0	0	0	0	0	1	0	0	0	0	0	0	0	0	0	0	0	0	0	0	0	0	0	0	0	0	0	0	0	0
HIPK2	0	0	0	0	0	0	0	0	0	0	0	0	0	0	0	0	0	0	0	0	0	0	0	0	1	0	0	0	0	0	0	0	0	0	0	0	0	0	0	0	0	0	0	0	0	0	0	0	0
CLN8	0	0	0	0	0	0	0	0	0	0	0	0	0	0	0	0	0	0	0	0	0	0	0	0	1	0	0	0	0	0	0	0	0	0	0	0	0	0	0	0	0	0	0	0	0	0	0	0	0
ASTN2	0	0	0	0	0	0	0	0	0	0	0	0	0	0	0	0	0	0	0	0	0	0	0	0	1	0	0	0	0	0	1	0	0	0	0	0	0	0	0	0	0	0	0	0	0	0	0	0	0
SLC22A9	0	0	0	0	0	0	0	0	0	0	0	0	0	0	0	0	0	0	0	0	0	0	0	0	1	0	0	0	0	0	0	0	0	0	0	0	0	0	0	0	0	0	0	0	0	0	0	0	0
OVCH1	0	0	0	0	0	0	0	0	0	0	0	0	0	0	0	0	0	0	0	0	0	0	0	0	1	0	0	0	0	0	0	0	0	0	0	0	0	0	0	0	0	0	0	0	0	0	0	0	0
HOXC8	0	0	0	0	0	0	0	0	0	0	0	0	0	0	0	0	0	0	0	0	0	0	0	0	1	0	0	0	0	0	0	0	0	0	0	0	0	0	0	0	0	0	0	0	0	0	0	0	0
CHD8	0	0	0	0	0	0	0	0	0	0	0	0	0	0	0	0	0	0	0	0	0	0	0	0	1	0	0	0	0	0	0	0	0	0	0	0	0	0	0	0	0	0	0	0	0	0	0	0	0
ARF6	0	0	0	0	0	0	0	0	0	0	0	0	0	0	0	0	0	0	0	0	0	0	0	0	1	0	0	0	0	0	0	0	0	0	0	0	0	0	0	0	0	0	0	0	0	0	0	0	0
CDAN1	0	0	0	0	0	0	0	0	0	0	0	0	0	0	0	0	0	0	0	0	0	0	0	0	1	0	0	0	0	0	0	0	0	0	0	0	0	0	0	0	0	0	0	0	0	0	0	0	0
LIPC	0	0	0	0	0	0	0	0	0	0	0	0	0	0	0	0	0	0	0	0	0	0	0	0	1	0	0	0	0	0	0	0	0	0	0	0	0	0	0	0	0	0	0	0	0	0	0	0	0
SH2D7	0	0	0	0	0	0	0	0	0	0	0	0	0	0	0	0	0	0	0	0	0	0	0	0	1	0	0	0	0	0	0	0	0	0	0	0	0	0	0	0	0	0	0	0	0	0	0	0	0
SREBF1	0	0	0	0	0	0	0	0	0	0	0	0	0	0	0	0	0	0	0	0	0	0	0	0	1	0	0	0	0	0	0	0	0	0	0	0	0	0	0	0	0	0	0	0	0	0	0	0	0
EVPL	0	0	0	0	0	0	0	0	0	0	0	0	0	0	0	0	0	0	0	0	0	0	0	0	1	0	0	0	0	0	0	0	0	0	0	0	0	0	0	0	0	0	0	0	0	0	0	0	0
OR7C1	0	0	0	0	0	0	0	0	0	0	0	0	0	0	0	0	0	0	0	0	0	0	0	0	1	0	0	0	0	0	0	0	0	0	0	0	0	0	0	0	0	0	0	0	0	0	0	0	0
ZBED4	0	0	0	0	0	0	0	0	0	0	0	0	0	0	0	0	0	0	0	0	0	0	0	0	1	0	0	0	0	0	0	0	0	0	0	0	0	0	0	0	0	0	0	0	0	0	0	0	0
TBC1D8B	0	0	0	0	0	0	0	0	0	0	0	0	0	0	0	0	0	0	0	0	0	0	0	0	1	0	0	0	0	0	0	0	0	0	0	0	0	0	0	0	0	0	0	0	0	0	0	0	0
KLHL13	0	0	0	0	0	0	0	0	0	0	0	0	0	0	0	0	0	0	0	0	0	0	0	0	1	0	0	0	0	0	0	0	0	0	0	0	0	0	0	0	0	0	0	0	0	0	0	0	0
TAS1R2	0	0	0	0	0	0	0	0	0	0	0	0	0	0	0	0	0	0	0	0	0	0	0	0	0	1	0	0	0	0	0	0	0	0	0	0	0	0	0	0	0	0	0	0	0	0	0	0	0
PNRC2	0	0	0	0	0	0	0	0	0	0	0	0	0	0	0	0	0	0	0	0	0	0	0	0	0	1	0	0	0	0	0	0	0	0	0	0	0	0	0	0	0	0	0	0	0	0	0	0	0
ZBTB41	0	0	0	0	0	0	0	0	0	0	0	0	0	0	0	0	0	0	0	0	0	0	0	0	0	1	0	0	0	0	0	0	1	0	0	0	0	0	0	0	0	0	0	0	0	0	0	0	0
BIRC6	0	0	0	0	0	0	0	0	0	0	0	0	0	0	0	0	0	0	0	0	0	0	0	0	0	1	0	0	0	0	0	0	0	0	0	0	0	0	0	0	0	0	0	0	0	0	0	0	0
RANBP2	0	0	0	0	0	0	0	0	0	0	0	0	0	0	0	0	0	0	0	0	0	0	0	0	0	1	0	0	0	0	0	0	0	0	0	0	0	0	0	0	0	0	0	0	0	0	0	0	0
WIPF1	0	0	0	0	0	0	0	0	0	0	0	0	0	0	0	0	0	0	0	0	0	0	0	0	0	1	0	0	0	0	0	0	0	0	0	0	0	0	0	0	0	0	0	0	0	0	0	0	0
COL5A2	0	0	0	0	0	0	0	0	0	0	0	0	0	0	0	0	0	0	0	0	0	0	0	0	0	1	0	0	0	0	0	0	0	0	0	0	0	0	0	0	0	0	0	0	0	0	0	0	0
MBD4	0	0	0	0	0	0	0	0	0	0	0	0	0	0	0	0	0	0	0	0	0	0	0	0	0	1	0	0	0	0	0	0	0	0	0	0	0	0	0	0	0	0	0	0	0	0	0	0	0
TMEM165	0	0	0	0	0	0	0	0	0	0	0	0	0	0	0	0	0	0	0	0	0	0	0	0	0	1	0	0	0	0	0	0	0	0	0	0	0	0	0	0	0	0	0	0	0	0	0	0	0
FBN2	0	0	0	0	0	0	0	0	0	0	0	0	0	0	0	0	0	0	0	0	0	0	0	0	0	1	0	0	0	0	0	0	0	0	0	0	0	0	0	0	1	0	0	0	0	0	0	0	0
SLC22A4	0	0	0	0	0	0	0	0	0	0	0	0	0	0	0	0	0	0	0	0	0	0	0	0	0	1	0	0	0	0	0	0	0	0	0	0	0	0	0	0	0	0	0	0	0	0	0	0	0
SEC63	0	0	0	0	0	0	0	0	0	0	0	0	0	0	0	0	0	0	0	0	0	0	0	0	0	1	0	0	0	0	0	0	0	0	0	0	0	0	0	0	0	0	0	0	0	0	0	0	0
COBL	0	0	0	0	0	0	0	0	0	0	0	0	0	0	0	0	0	0	0	0	0	0	0	0	0	1	0	0	0	0	0	0	0	0	0	0	0	0	0	0	0	0	0	0	0	0	0	0	0
AKR1B10	0	0	0	0	0	0	0	0	0	0	0	0	0	0	0	0	0	0	0	0	0	0	0	0	0	1	0	0	0	0	0	0	0	0	0	0	0	0	0	0	0	0	0	0	0	0	0	0	0
ZNF782	0	0	0	0	0	0	0	0	0	0	0	0	0	0	0	0	0	0	0	0	0	0	0	0	0	1	0	0	0	0	0	0	0	0	0	0	0	0	0	0	0	0	0	0	0	0	0	0	0
LHX6	0	0	0	0	0	0	0	0	0	0	0	0	0	0	0	0	0	0	0	0	0	0	0	0	0	1	0	0	0	0	0	0	0	0	0	0	0	0	0	0	0	0	0	0	0	0	0	0	0
CUBN	0	0	0	0	0	0	0	0	0	0	0	0	0	0	0	0	0	0	0	0	0	0	0	0	0	1	0	0	0	0	0	0	0	0	0	0	0	0	0	0	0	0	0	0	0	0	0	0	0
CABCOCO1	0	0	0	0	0	0	0	0	0	0	0	0	0	0	0	0	0	0	0	0	0	0	0	0	0	1	0	0	0	0	0	0	0	0	0	0	0	0	0	0	0	0	0	0	0	0	0	0	0
MOB2	0	0	0	0	0	0	0	0	0	0	0	0	0	0	0	0	0	0	0	0	0	0	0	0	0	1	0	0	0	0	0	0	0	0	0	0	0	0	0	0	0	0	0	0	0	0	0	0	0
HIKESHI	0	0	0	0	0	0	0	0	0	0	0	0	0	0	0	0	0	0	0	0	0	0	0	0	0	1	0	0	0	0	0	0	0	0	0	0	0	0	0	0	0	0	0	0	0	0	0	0	0
PARP11	0	0	0	0	0	0	0	0	0	0	0	0	0	0	0	0	0	0	0	0	0	0	0	0	0	1	0	0	0	0	0	0	0	0	0	0	0	0	0	0	0	0	0	0	0	0	0	0	0
MON2	0	0	0	0	0	0	0	0	0	0	0	0	0	0	0	0	0	0	0	0	0	0	0	0	0	1	0	0	0	0	0	0	0	0	0	0	0	0	0	0	0	0	0	0	0	0	0	0	0
PLEKHG7	0	0	0	0	0	0	0	0	0	0	0	0	0	0	0	0	0	0	0	0	0	0	0	0	0	1	0	0	0	0	0	0	0	0	0	0	0	0	0	0	0	0	0	0	0	0	0	0	0
LACC1	0	0	0	0	0	0	0	0	0	0	0	0	0	0	0	0	0	0	0	0	0	0	0	0	0	1	0	0	0	0	0	0	0	0	0	0	0	0	0	0	0	0	0	0	0	0	0	0	0
ATP7B	0	0	0	0	0	0	0	0	0	0	0	0	0	0	0	0	0	0	0	0	0	0	0	0	0	1	0	0	0	0	0	0	0	0	0	0	0	0	0	0	0	0	0	0	0	0	0	0	0
OR3A1	0	0	0	0	0	0	0	0	0	0	0	0	0	0	0	0	0	0	0	0	0	0	0	0	0	1	0	0	0	0	0	0	0	0	0	0	0	0	0	0	0	0	0	0	0	0	0	0	0
SSH2	0	0	0	0	0	0	0	0	0	0	0	0	0	0	0	0	0	0	0	0	0	0	0	0	0	1	0	0	0	0	0	0	0	0	0	0	0	0	0	0	0	0	0	0	1	0	0	0	0
FXYD5	0	0	0	0	0	0	0	0	0	0	0	0	0	0	0	0	0	0	0	0	0	0	0	0	0	1	0	0	0	0	0	0	0	0	0	0	0	0	0	0	0	0	0	0	0	0	0	0	0
P2RX6	0	0	0	0	0	0	0	0	0	0	0	0	0	0	0	0	0	0	0	0	0	0	0	0	0	1	0	0	0	0	0	0	0	0	0	0	0	0	0	0	0	0	0	0	0	0	0	0	0
FBXO42	0	0	0	0	0	0	0	0	0	0	0	0	0	0	0	0	0	0	0	0	0	0	0	0	0	0	1	0	0	0	0	0	0	0	0	0	0	0	0	0	0	0	0	0	0	0	0	0	0
SDC3	0	0	0	0	0	0	0	0	0	0	0	0	0	0	0	0	0	0	0	0	0	0	0	0	0	0	1	0	0	0	0	0	0	0	0	0	0	0	0	0	0	0	0	0	0	0	0	0	0
PCSK9	0	0	0	0	0	0	0	0	0	0	0	0	0	0	0	0	0	0	0	0	0	0	0	0	0	0	1	0	0	0	0	0	0	0	0	0	0	0	0	0	0	0	0	0	0	0	0	0	0
CREB3L4	0	0	0	0	0	0	0	0	0	0	0	0	0	0	0	0	0	0	0	0	0	0	0	0	0	0	1	0	0	0	0	0	0	0	0	0	0	0	0	0	0	0	0	0	0	0	0	0	0
OLFML2B	0	0	0	0	0	0	0	0	0	0	0	0	0	0	0	0	0	0	0	0	0	0	0	0	0	0	1	0	0	0	0	0	0	0	0	0	0	0	0	0	0	0	0	0	0	0	0	0	0
MARK1	0	0	0	0	0	0	0	0	0	0	0	0	0	0	0	0	0	0	0	0	0	0	0	0	0	0	1	0	0	0	0	0	0	0	0	0	0	0	0	0	0	0	0	0	0	0	0	0	0
OR2AK2	0	0	0	0	0	0	0	0	0	0	0	0	0	0	0	0	0	0	0	0	0	0	0	0	0	0	1	0	0	0	0	0	0	0	0	0	0	0	0	0	0	0	0	0	0	0	0	0	0
SCN3A	0	0	0	0	0	0	0	0	0	0	0	0	0	0	0	0	0	0	0	0	0	0	0	0	0	0	1	0	0	0	0	0	0	0	0	0	0	0	0	0	0	0	0	0	0	0	0	0	0
ARL8B	0	0	0	0	0	0	0	0	0	0	0	0	0	0	0	0	0	0	0	0	0	0	0	0	0	0	1	0	0	0	0	0	0	0	0	0	0	0	0	0	0	0	0	0	0	0	0	0	0
NKTR	0	0	0	0	0	0	0	0	0	0	0	0	0	0	0	0	0	0	0	0	0	0	0	0	0	0	1	0	0	0	0	0	0	0	0	0	0	0	0	0	0	0	0	0	0	0	0	0	0
PLXNA1	0	0	0	0	0	0	0	0	0	0	0	0	0	0	0	0	0	0	0	0	0	0	0	0	0	0	1	0	0	0	0	0	0	0	0	0	0	0	0	0	0	0	0	0	0	0	0	0	0
NPHP3	0	0	0	0	0	0	0	0	0	0	0	0	0	0	0	0	0	0	0	0	0	0	0	0	0	0	1	0	0	0	0	0	0	0	0	1	0	0	0	0	0	0	0	0	0	0	0	0	0
TSPAN5	0	0	0	0	0	0	0	0	0	0	0	0	0	0	0	0	0	0	0	0	0	0	0	0	0	0	1	0	0	0	0	0	0	0	0	0	0	0	0	0	0	0	0	0	0	0	0	0	0
LEF1	0	0	0	0	0	0	0	0	0	0	0	0	0	0	0	0	0	0	0	0	0	0	0	0	0	0	1	0	0	0	0	0	0	0	0	0	0	0	0	0	0	0	0	0	0	0	0	0	0
TMEM267	0	0	0	0	0	0	0	0	0	0	0	0	0	0	0	0	0	0	0	0	0	0	0	0	0	0	1	0	0	0	0	0	0	0	0	0	0	0	0	0	0	0	0	0	0	0	0	0	0
DHX29	0	0	0	0	0	0	0	0	0	0	0	0	0	0	0	0	0	0	0	0	0	0	0	0	0	0	1	1	0	0	0	0	0	0	0	0	0	0	0	0	0	0	0	0	0	0	0	0	0
ADAMTS2	0	0	0	0	0	0	0	0	0	0	0	0	0	0	0	0	0	0	0	0	0	0	0	0	0	0	1	0	0	1	0	0	0	0	0	0	0	0	0	0	0	0	0	0	0	0	0	0	0
ALDH8A1	0	0	0	0	0	0	0	0	0	0	0	0	0	0	0	0	0	0	0	0	0	0	0	0	0	0	1	0	0	0	0	0	0	0	0	0	0	0	0	0	0	0	0	0	0	0	0	0	0
KCTD7	0	0	0	0	0	0	0	0	0	0	0	0	0	0	0	0	0	0	0	0	0	0	0	0	0	0	1	0	0	0	0	0	0	0	0	0	0	0	0	0	0	0	0	0	0	0	0	0	0
PPP1R9A	0	0	0	0	0	0	0	0	0	0	0	0	0	0	0	0	0	0	0	0	0	0	0	0	0	0	1	0	0	0	0	0	0	0	0	0	0	0	0	0	0	0	0	0	0	0	0	0	0
MOSPD3	0	0	0	0	0	0	0	0	0	0	0	0	0	0	0	0	0	0	0	0	0	0	0	0	0	0	1	0	0	0	0	0	0	0	0	0	0	0	0	0	0	0	0	0	0	0	0	0	0
NCOA2	0	0	0	0	0	0	0	0	0	0	0	0	0	0	0	0	0	0	0	0	0	0	0	0	0	0	1	0	0	0	0	0	0	0	0	0	0	0	0	0	0	0	0	0	0	0	0	0	0
ADCY8	0	0	0	0	0	0	0	0	0	0	0	0	0	0	0	0	0	0	0	0	0	0	0	0	0	0	1	0	0	0	0	0	0	0	0	0	0	0	0	0	0	0	0	0	0	0	0	0	0
SARDH	0	0	0	0	0	0	0	0	0	0	0	0	0	0	0	0	0	0	0	0	0	0	0	0	0	0	1	0	0	0	0	0	0	0	0	0	0	0	0	0	0	0	0	0	0	0	0	0	0
NDST2	0	0	0	0	0	0	0	0	0	0	0	0	0	0	0	0	0	0	0	0	0	0	0	0	0	0	1	0	0	0	0	0	0	0	0	0	0	0	0	0	0	0	0	0	0	0	0	0	0
RNLS	0	0	0	0	0	0	0	0	0	0	0	0	0	0	0	0	0	0	0	0	0	0	0	0	0	0	1	0	0	0	0	0	0	0	0	0	0	0	0	0	0	0	0	0	0	0	0	0	0
ABTB2	0	0	0	0	0	0	0	0	0	0	0	0	0	0	0	0	0	0	0	0	0	0	0	0	0	0	1	0	0	0	0	0	0	0	0	0	0	0	0	0	0	0	0	0	0	0	0	0	0
MADD	0	0	0	0	0	0	0	0	0	0	0	0	0	0	0	0	0	0	0	0	0	0	0	0	0	0	1	0	0	0	0	0	0	0	0	0	0	0	0	0	0	0	0	0	0	0	0	0	0
CARNS1	0	0	0	0	0	0	0	0	0	0	0	0	0	0	0	0	0	0	0	0	0	0	0	0	0	0	1	0	0	0	0	0	0	0	0	0	0	0	0	0	0	0	0	0	0	0	0	0	0
CCDC81	0	0	0	0	0	0	0	0	0	0	0	0	0	0	0	0	0	0	0	0	0	0	0	0	0	0	1	0	0	0	0	0	0	0	0	1	0	0	0	0	0	0	0	0	0	0	0	0	0
ABCC9	0	0	0	0	0	0	0	0	0	0	0	0	0	0	0	0	0	0	0	0	0	0	0	0	0	0	1	0	0	0	0	0	0	0	0	0	0	0	0	0	0	0	0	0	0	0	0	0	0
POC1B-GALNT4	0	0	0	0	0	0	0	0	0	0	0	0	0	0	0	0	0	0	0	0	0	0	0	0	0	0	1	0	0	0	0	0	0	0	0	0	0	0	0	0	0	0	0	0	0	0	0	0	0
KBTBD6	0	0	0	0	0	0	0	0	0	0	0	0	0	0	0	0	0	0	0	0	0	0	0	0	0	0	1	0	0	0	0	0	0	0	0	0	0	0	0	0	0	0	0	0	0	0	0	0	0
TJP1	0	0	0	0	0	0	0	0	0	0	0	0	0	0	0	0	0	0	0	0	0	0	0	0	0	0	1	0	0	0	0	0	0	0	0	0	0	0	0	0	0	0	0	0	0	0	0	1	0
SRRM2	0	0	0	0	0	0	0	0	0	0	0	0	0	0	0	0	0	0	0	0	0	0	0	0	0	0	1	0	0	0	0	0	0	0	0	0	0	0	0	0	0	0	0	0	0	0	0	0	0
CDH11	0	0	0	0	0	0	0	0	0	0	0	0	0	0	0	0	0	0	0	0	0	0	0	0	0	0	1	0	0	0	0	0	0	0	0	0	0	0	0	0	0	0	0	0	0	0	0	0	0
ZFHX3	0	0	0	0	0	0	0	0	0	0	0	0	0	0	0	0	0	0	0	0	0	0	0	0	0	0	1	0	0	0	0	0	0	0	0	0	0	0	0	0	0	0	0	0	0	0	0	0	0
LHX1	0	0	0	0	0	0	0	0	0	0	0	0	0	0	0	0	0	0	0	0	0	0	0	0	0	0	1	0	1	0	0	0	0	0	0	0	0	0	0	0	0	0	0	0	0	0	0	0	0
FBF1	0	0	0	0	0	0	0	0	0	0	0	0	0	0	0	0	1	0	0	0	0	0	0	0	0	0	1	0	0	0	0	0	0	0	0	0	0	0	0	0	0	0	0	0	0	0	0	0	0
CABLES1	0	0	0	0	0	0	0	0	0	0	0	0	0	0	0	0	0	0	0	0	0	0	0	0	0	0	1	0	0	0	0	0	0	0	0	0	0	0	0	0	0	0	0	0	0	0	0	0	0
ZNF763	0	0	0	0	0	0	0	0	0	0	0	0	0	0	0	0	0	0	0	0	0	0	0	0	0	0	1	0	0	0	0	0	0	0	0	0	0	0	0	0	0	0	0	0	0	0	0	0	0
CC2D1A	0	0	0	0	0	0	0	0	0	0	0	0	0	0	0	0	0	0	0	0	0	0	0	0	0	0	1	0	0	0	0	0	0	0	0	0	0	0	0	0	0	0	0	0	0	0	0	0	0
GGTLC1	0	0	0	0	0	0	0	0	0	0	0	0	0	0	0	0	0	0	0	0	0	0	0	0	0	0	1	0	0	0	0	0	0	0	0	0	0	0	0	0	0	0	0	0	0	0	0	0	0
ADAMTS5	0	0	0	0	0	0	0	0	0	0	0	0	0	0	0	0	0	0	0	0	0	0	0	0	0	0	1	0	0	0	0	0	0	0	0	0	0	0	0	0	0	0	0	0	0	0	0	0	0
PPP2R3B	0	0	0	0	0	0	0	0	0	0	0	0	0	0	0	0	0	0	0	0	0	0	0	0	0	0	1	0	0	0	0	0	0	0	0	0	0	0	0	0	0	0	0	0	0	0	0	0	0
RAI2	0	0	0	0	0	0	0	0	0	0	0	0	0	0	0	0	0	0	0	0	0	0	0	0	0	0	1	0	0	0	0	0	0	0	0	0	0	0	0	0	0	0	0	0	0	0	0	0	0
SELE	0	0	0	0	0	0	0	0	0	0	0	0	0	0	0	0	0	0	0	0	0	0	0	0	0	0	0	1	0	0	0	0	0	0	0	0	0	0	0	0	0	0	0	0	0	0	0	0	0
GREM2	0	0	0	0	0	0	0	0	0	0	0	0	0	0	0	0	0	0	0	0	0	0	0	0	0	0	0	1	0	0	0	0	0	0	0	0	0	0	0	0	0	0	0	0	0	0	0	0	0
MYT1L	0	0	0	0	0	0	0	0	0	0	0	0	0	0	0	0	0	0	0	0	0	0	0	0	0	0	0	1	0	0	0	0	0	0	0	0	0	0	0	0	0	0	0	0	0	0	0	0	0
DNAH7	0	0	0	0	0	0	0	0	0	0	0	0	0	0	0	0	0	0	0	0	0	0	0	0	0	0	0	1	0	1	0	0	0	0	0	0	0	0	0	0	0	0	0	0	0	0	0	0	0
SPSB4	0	0	0	0	0	0	0	0	0	0	0	0	0	0	0	0	0	0	0	0	0	0	0	0	0	0	0	1	0	0	0	0	0	0	0	0	0	0	0	0	0	0	0	0	0	0	0	0	0
CCDC39	0	0	0	0	0	0	0	0	0	0	0	0	0	0	0	0	0	0	0	0	0	0	0	0	0	0	0	1	0	0	0	0	0	0	0	0	0	0	0	0	0	0	0	0	0	0	0	0	0
SLC2A9	0	0	0	0	0	0	0	0	0	0	0	0	0	0	0	0	0	0	0	0	0	0	0	0	0	0	0	1	0	0	0	0	0	0	0	0	0	0	0	0	0	0	0	0	0	0	0	0	0
ANKRD17	0	0	0	0	0	0	0	0	0	0	0	0	0	0	0	0	0	0	0	0	0	0	0	0	0	0	0	1	0	0	0	0	0	0	0	0	0	0	0	0	0	0	0	0	0	0	0	0	0
GATB	0	0	0	0	0	0	0	0	0	0	0	0	0	0	0	0	0	0	0	0	0	0	0	0	0	0	0	1	0	0	0	0	0	0	0	0	0	0	0	0	0	0	0	0	0	0	0	0	0
PAM	0	0	0	0	0	0	0	0	0	0	0	0	0	0	0	0	0	0	0	0	0	0	0	0	0	0	0	1	0	0	0	0	0	0	0	0	0	0	0	0	0	0	0	0	0	0	0	0	0
BRPF3	0	0	0	0	0	0	0	0	0	0	0	0	0	0	0	0	0	0	0	0	0	0	0	0	0	0	0	1	0	0	0	0	0	0	0	0	0	0	0	0	0	0	0	0	0	0	0	0	0
ZHX2	0	0	0	0	0	0	0	0	0	0	0	0	0	0	0	0	0	0	0	0	0	0	0	0	0	0	0	1	0	0	0	0	0	0	0	0	0	0	0	0	0	0	0	0	0	0	0	0	0
RHPN1	0	0	0	0	0	0	0	0	0	0	0	0	0	0	0	0	0	0	0	0	0	0	0	0	0	0	0	1	0	0	0	0	0	0	0	0	0	0	0	0	0	0	0	0	0	0	0	0	0
ATG2A	0	0	0	0	0	0	0	0	0	0	0	0	0	0	0	0	0	0	0	0	0	0	0	0	0	0	0	1	0	0	0	0	0	0	0	0	0	0	0	0	0	0	0	0	0	0	1	0	0
CCDC87	0	0	0	0	0	0	0	0	0	0	0	0	0	0	0	0	0	0	0	0	0	0	0	0	0	0	0	1	0	0	1	0	0	0	0	0	0	0	0	0	0	0	0	0	0	0	0	0	0
BRCA2	0	0	0	0	0	0	0	0	0	0	0	0	0	0	0	0	0	0	0	0	0	0	0	0	0	0	0	1	0	0	0	0	0	0	0	0	0	0	0	0	0	0	0	0	0	0	0	0	0
EMP2	0	0	0	0	0	0	0	0	0	0	0	0	0	0	0	0	0	0	0	0	0	0	0	0	0	0	0	1	0	0	0	0	0	0	0	0	0	0	0	0	0	0	0	0	0	0	0	0	0
MYH11	0	0	0	0	0	0	0	0	0	0	0	0	0	0	0	0	0	0	0	0	0	0	0	0	0	0	0	1	0	0	0	0	0	0	0	0	0	0	0	0	0	0	0	0	0	0	0	0	0
WDR81	0	0	0	0	0	0	0	0	0	0	0	0	0	0	0	0	0	0	0	0	0	0	0	0	0	0	0	1	0	0	0	0	0	0	0	0	0	0	0	0	0	0	0	0	0	0	0	0	0
DDX42	0	0	0	0	0	0	0	0	0	0	0	0	0	0	0	0	0	0	0	0	0	0	0	0	0	0	0	1	0	0	0	0	0	0	0	0	0	0	0	0	0	0	0	0	0	0	0	0	0
SBNO2	0	0	0	0	0	0	0	0	0	0	0	0	0	0	0	0	0	0	0	0	0	0	0	0	0	0	0	1	0	0	0	0	0	0	0	0	0	0	0	0	0	0	0	0	0	0	0	0	0
HSPB6	0	0	0	0	0	0	0	0	0	0	0	0	0	0	0	0	0	0	0	0	0	0	0	0	0	0	0	1	0	0	0	0	0	0	0	0	0	0	0	0	0	0	0	0	0	0	0	0	0
NLRP2	0	0	0	0	0	0	0	0	0	0	0	0	0	0	0	0	0	0	0	0	0	0	0	0	0	0	0	1	0	0	0	0	0	0	0	0	0	0	0	0	0	0	0	0	0	0	0	0	0
WNK3	0	0	0	0	0	0	0	0	0	0	0	0	0	0	0	0	0	0	0	0	0	0	0	0	0	0	0	1	0	0	0	0	0	0	0	0	0	0	0	0	0	0	0	0	0	0	0	0	0
TRIM62	0	0	0	0	0	0	0	0	0	0	0	0	0	0	0	0	0	0	0	0	0	0	0	0	0	0	0	0	1	0	0	0	0	1	0	0	0	0	0	0	0	0	0	0	0	0	0	0	0
SLC44A3	0	0	0	0	0	0	0	0	0	0	0	0	0	0	0	0	0	0	0	0	0	0	0	0	0	0	0	0	1	0	0	0	0	0	0	0	0	0	0	0	0	0	0	0	0	0	0	0	0
CNOT11	0	0	0	0	0	0	0	0	0	0	0	0	0	0	0	0	0	0	0	0	0	0	0	0	0	0	0	0	1	0	0	0	0	0	0	0	0	0	0	0	0	0	0	0	1	0	0	0	0
ACVR2A	0	0	0	0	0	0	0	0	0	0	0	0	0	0	0	0	0	0	0	0	0	0	0	0	0	0	0	0	1	0	0	0	0	0	0	0	0	0	0	0	0	0	0	0	0	0	0	0	0
RAPGEF2	0	0	0	0	0	0	0	0	0	0	0	0	0	0	0	0	0	0	0	0	0	0	0	0	0	0	0	0	1	0	0	0	0	0	0	0	0	0	0	0	0	0	0	0	0	0	0	0	0
TBC1D9B	0	0	0	0	0	0	0	0	0	0	0	0	0	0	0	0	0	0	0	0	0	0	0	0	0	0	0	0	1	0	0	0	0	0	0	0	0	0	0	0	0	0	0	0	0	0	0	0	0
C6orf62	0	0	0	0	0	0	0	0	0	0	0	0	0	0	0	0	0	0	0	0	0	0	0	0	0	0	0	0	1	0	0	0	0	0	0	0	0	0	0	0	0	0	0	0	0	0	0	0	0
COL26A1	0	0	0	0	0	0	0	0	0	0	0	0	0	0	0	0	0	0	0	0	0	0	0	0	0	0	0	0	1	0	0	0	0	0	0	0	0	0	0	0	0	0	0	0	0	0	0	0	0
REXO4	0	0	0	0	0	0	0	0	0	0	0	0	0	0	0	0	0	0	0	0	0	0	0	0	0	0	0	0	1	0	0	0	0	0	0	0	0	0	0	0	0	0	0	0	0	0	0	0	0
C11orf94	0	0	0	0	0	0	0	0	0	0	0	0	0	0	0	0	0	0	0	0	0	0	0	0	0	0	0	0	1	0	0	0	0	0	0	0	0	0	0	0	0	0	0	0	0	0	0	0	0
ZNRD2	0	0	0	0	0	0	0	0	0	0	0	0	0	0	0	0	0	0	0	0	0	0	0	0	0	0	0	0	1	0	0	0	0	0	0	0	0	0	0	0	0	0	0	0	0	0	0	0	0
RAD51AP1	0	0	0	0	0	0	0	0	0	0	0	0	0	0	0	0	0	0	0	0	0	0	0	0	0	0	0	0	1	0	0	0	0	0	0	0	0	0	0	0	0	0	0	0	0	0	0	0	0
GDF3	0	0	0	0	0	0	0	0	0	0	0	0	0	0	0	0	0	0	0	0	0	0	0	0	0	0	0	0	1	0	0	0	0	0	0	0	0	0	0	0	0	0	0	0	0	0	0	0	0
KLRC1	0	0	0	0	0	0	0	0	0	0	0	0	0	0	0	0	0	0	0	0	0	0	0	0	0	0	0	0	1	0	0	0	0	0	0	0	0	0	0	0	0	0	0	0	0	0	0	0	0
KMT2D	0	0	0	0	0	0	0	0	0	0	0	0	0	0	0	0	0	0	0	0	0	0	0	0	0	0	0	0	1	0	0	0	0	0	0	0	0	0	0	0	1	0	0	0	0	0	0	0	0
ATP5MC2	0	0	0	0	0	0	0	0	0	0	0	0	0	0	0	0	0	0	0	0	0	0	0	0	0	0	0	0	1	0	0	0	0	0	0	0	0	0	0	0	0	0	0	0	0	0	0	0	0
SFSWAP	0	0	0	0	0	0	0	0	0	0	0	0	0	0	0	0	0	0	0	0	0	0	0	0	0	0	0	0	1	0	0	0	0	0	0	0	0	0	0	0	0	0	0	0	0	0	0	0	0
FGF9	0	0	0	0	0	0	0	0	0	0	0	0	0	0	0	0	0	0	0	0	0	0	0	0	0	0	0	0	1	0	0	0	0	0	0	0	0	0	0	0	0	0	0	0	0	0	0	0	0
PLEKHG3	0	0	0	0	0	0	0	0	0	0	0	0	0	0	0	0	0	0	0	0	0	0	0	0	0	0	0	0	1	0	1	0	0	0	0	0	0	0	0	0	0	0	0	0	0	0	0	0	0
CYP46A1	0	0	0	0	0	0	0	0	0	0	0	0	0	0	0	0	0	0	0	0	0	0	0	0	0	0	0	0	1	0	0	0	0	0	0	0	0	0	0	0	0	0	0	0	0	0	0	0	0
SALL1	0	0	0	0	0	0	0	0	0	0	0	0	0	0	0	0	0	0	0	0	0	0	0	0	0	0	0	0	1	0	0	0	0	0	0	0	0	0	0	0	0	0	0	0	0	0	0	0	0
CTCF	0	0	0	0	0	0	0	0	0	0	0	0	0	0	0	0	0	0	0	0	0	0	0	0	0	0	0	0	1	0	0	0	0	0	0	0	0	0	0	0	0	0	0	0	0	0	0	0	0
CWC25	0	0	0	0	0	0	0	0	0	0	0	0	0	0	0	0	0	0	0	0	0	0	0	0	0	0	0	0	1	0	0	0	0	0	0	1	0	0	0	0	0	0	0	0	0	0	0	0	0
PCTP	0	0	0	0	0	0	0	0	0	0	0	0	0	0	0	0	0	0	0	0	0	0	0	0	0	0	0	0	1	0	0	0	0	0	0	0	0	0	0	0	0	0	0	0	0	0	0	0	0
PAK4	0	0	0	0	0	0	0	0	0	0	0	0	0	0	0	0	0	0	0	0	0	0	0	0	0	0	0	0	1	0	0	0	0	0	0	0	0	0	0	0	0	0	0	0	0	0	0	1	0
LIME1	0	0	0	0	0	0	0	0	0	0	0	0	0	0	0	0	0	0	0	0	0	0	0	0	0	0	0	0	1	0	0	0	0	0	0	0	0	0	0	0	0	0	0	0	0	0	0	0	0
TUBGCP6	0	0	0	0	0	0	0	0	0	0	0	0	0	0	0	0	0	0	0	0	0	0	0	0	0	0	0	0	1	0	0	0	0	0	0	0	0	0	0	0	0	0	0	0	0	0	0	0	0
SLC6A8	0	0	0	0	0	0	0	0	0	0	0	0	0	0	0	0	0	0	0	0	0	0	0	0	0	0	0	0	1	0	0	0	0	0	0	0	0	0	0	0	0	0	0	0	0	0	0	0	0
RWDD3	0	0	0	0	0	0	0	0	0	0	0	0	0	0	0	0	0	0	0	0	0	0	0	0	0	0	0	0	0	1	0	0	0	0	0	0	0	0	0	0	0	0	0	0	0	0	0	0	0
PLEKHH2	0	0	0	0	0	0	0	0	0	0	0	0	0	0	0	0	0	0	0	0	0	0	0	0	0	0	0	0	0	1	0	0	0	0	0	0	0	0	0	0	0	0	0	0	0	0	0	0	0
FBXO48	0	0	0	0	0	0	0	0	0	0	0	0	0	0	0	0	0	0	0	0	0	0	0	0	0	0	0	0	0	1	0	0	0	0	0	0	0	0	0	0	0	0	0	0	0	0	0	0	0
DBI	0	0	0	0	0	0	0	0	0	0	0	0	0	0	0	0	0	0	0	0	0	0	0	0	0	0	0	0	0	1	0	0	0	0	0	0	0	0	0	0	0	0	0	0	0	0	0	0	0
RASSF6	0	0	0	0	0	0	0	0	0	0	0	0	0	0	0	0	0	0	0	0	0	0	0	0	0	0	0	0	0	1	0	0	0	0	0	0	0	0	0	0	0	0	0	0	0	0	0	0	0
ZBED9	0	0	0	0	0	0	0	0	0	0	0	0	0	0	0	0	0	0	0	0	0	0	0	0	0	0	0	0	0	1	0	0	0	0	0	0	0	0	0	0	0	0	0	0	0	0	0	0	0
PLEKHG1	0	0	0	0	0	0	0	0	0	0	0	0	0	0	0	0	0	0	0	0	0	0	0	0	0	0	0	0	0	1	0	0	0	0	0	0	0	0	0	0	0	0	0	0	0	0	0	0	0
RPL30	0	0	0	0	0	0	0	0	0	0	0	0	0	0	0	0	0	0	0	0	0	0	0	0	0	0	0	0	0	1	0	0	0	0	0	0	0	0	0	0	0	0	0	0	0	0	0	0	0
IFNA5	0	0	0	0	0	0	0	0	0	0	0	0	0	0	0	0	0	0	0	0	0	0	0	0	0	0	0	0	0	1	0	0	0	0	0	0	0	0	0	0	0	0	0	0	0	0	0	0	0
ABCA1	0	0	0	0	0	0	0	0	0	0	0	0	0	0	0	0	0	0	0	0	0	0	0	0	0	0	0	0	0	1	0	0	0	0	0	0	0	0	0	0	0	0	0	0	0	0	0	0	0
SLC29A3	0	0	0	0	0	0	0	0	0	0	0	0	0	0	0	0	0	0	0	0	0	0	0	0	0	0	0	0	0	1	0	0	0	0	0	0	0	0	0	0	0	0	0	0	0	0	0	0	0
BTAF1	0	0	0	0	0	0	0	0	0	0	0	0	0	0	0	0	0	0	0	0	0	0	0	0	0	0	0	0	0	1	0	0	0	0	0	0	0	0	0	0	0	0	0	0	0	0	0	0	0
LOXL4	0	0	0	0	0	0	0	0	0	0	0	0	0	0	0	0	0	0	0	0	0	0	0	0	0	0	0	0	0	1	0	0	0	0	0	0	0	0	0	0	0	0	0	0	0	0	0	0	0
SLCO1B1	0	0	0	0	0	0	0	0	0	0	0	0	0	0	0	0	0	0	0	0	0	0	0	0	0	0	0	0	0	1	0	0	0	0	0	0	0	0	0	0	0	0	0	0	0	0	0	0	0
MYG1	0	0	0	0	0	0	0	0	0	0	0	0	0	0	0	0	0	0	0	0	0	0	0	0	0	0	0	0	0	1	0	0	0	0	0	0	0	0	0	0	0	0	0	0	0	0	0	0	0
BTBD11	0	0	0	0	0	0	0	0	0	0	0	0	0	0	0	0	0	0	0	0	0	0	0	0	0	0	0	0	0	1	0	0	0	0	0	0	0	0	0	0	0	0	0	0	0	0	0	0	0
DIAPH3	0	0	0	0	0	0	0	0	0	0	0	0	0	0	0	0	0	0	0	0	0	0	0	0	0	0	0	0	0	1	0	0	0	0	0	0	0	0	0	0	0	0	0	0	0	0	0	0	0
RALGAPA1	0	0	0	0	0	0	0	0	0	0	0	0	0	0	0	0	0	0	0	0	0	0	0	0	0	0	0	0	0	1	0	0	0	0	1	0	0	0	0	0	0	0	0	0	0	0	0	0	0
CDKL1	0	0	0	0	0	0	0	0	0	0	0	0	0	0	0	0	0	0	0	0	0	0	0	0	0	0	0	0	0	1	0	0	0	0	0	0	0	0	0	0	0	0	0	0	0	0	0	0	0
MYO9A	0	0	0	0	0	0	0	0	0	0	0	0	0	0	0	0	0	0	0	0	0	0	0	0	0	0	0	0	0	1	0	0	1	0	0	0	0	0	0	0	0	0	0	0	0	0	0	0	0
HAGH	0	0	0	0	0	0	0	0	0	0	0	0	0	0	0	0	0	0	0	0	0	0	0	0	0	0	0	0	0	1	0	0	0	0	0	0	0	0	0	0	0	0	0	0	0	0	0	0	0
TEKT5	0	0	0	0	0	0	0	0	0	0	0	0	0	0	0	0	0	0	0	0	0	0	0	0	0	0	0	0	0	1	0	0	0	0	0	0	0	0	0	0	0	0	0	0	0	0	0	0	0
ACSM3	0	0	0	0	0	0	0	0	0	0	0	0	0	0	0	0	0	0	0	0	0	0	0	0	0	0	0	0	0	1	0	0	0	0	0	0	0	0	0	0	0	0	0	0	0	0	0	0	0
ABHD17A	0	0	0	0	0	0	0	0	0	0	0	0	0	0	0	0	0	0	0	0	0	0	0	0	0	0	0	0	0	1	0	0	0	0	0	0	0	0	0	0	0	0	0	0	0	0	0	0	0
CLCN5	0	0	0	0	0	0	0	0	0	0	0	0	0	0	0	0	0	0	0	0	0	0	0	0	0	0	0	0	0	1	0	0	0	0	0	0	0	0	0	0	0	0	0	0	0	0	0	0	0
ACTRT2	0	0	0	0	0	0	0	0	0	0	0	0	0	0	0	0	0	0	0	0	0	0	0	0	0	0	0	0	0	0	1	0	0	0	0	0	0	0	0	0	0	0	0	0	0	0	0	0	0
FBXO2	0	0	0	0	0	0	0	0	0	0	0	0	0	0	0	0	0	0	0	0	0	0	0	0	0	0	0	0	0	0	1	0	0	0	0	0	0	0	0	0	0	0	0	0	0	0	0	0	0
CATSPER4	0	0	0	0	0	0	0	0	0	0	0	0	0	0	0	0	0	0	0	0	0	0	0	0	0	0	0	0	0	0	1	0	0	0	0	0	0	0	0	0	0	0	0	0	0	0	0	0	0
HRNR	0	0	0	0	0	0	0	0	0	0	0	0	0	0	0	0	0	0	0	0	0	0	0	0	0	0	0	0	0	0	1	0	0	0	0	0	0	0	0	0	0	0	0	0	0	0	0	0	0
NIT1	0	0	0	0	0	0	0	0	0	0	0	0	0	0	0	0	0	0	0	0	0	0	0	0	0	0	0	0	0	0	1	0	0	0	0	0	0	0	0	0	0	0	0	0	0	0	0	0	0
BTG2	0	0	0	0	0	0	0	0	0	0	0	0	0	0	0	0	0	0	0	0	0	0	0	0	0	0	0	0	0	0	1	0	0	0	0	0	0	0	0	0	0	0	0	0	0	0	0	0	0
STIMATE	0	0	0	0	0	0	0	0	0	0	0	0	0	0	0	0	0	0	0	0	0	0	0	0	0	0	0	0	0	0	1	0	0	0	0	0	0	0	0	0	0	0	0	0	0	0	0	0	0
TRMT44	0	0	0	0	0	0	0	0	0	0	0	0	0	0	0	0	0	0	0	0	0	0	0	0	0	0	0	0	0	0	1	0	0	0	0	0	0	0	0	0	0	0	0	0	0	0	0	0	0
GABRG1	0	0	0	0	0	0	0	0	0	0	0	0	0	0	0	0	0	0	0	0	0	0	0	0	0	0	0	0	0	0	1	0	0	0	0	0	0	0	0	0	0	0	0	0	0	0	0	0	0
NPNT	0	0	0	0	0	0	0	0	0	0	0	0	0	0	0	0	0	0	0	0	0	0	0	0	0	0	0	0	0	0	1	0	0	0	0	0	0	0	0	0	0	0	0	0	0	0	0	0	0
RP1L1	0	0	0	0	0	0	0	0	0	0	0	0	0	0	0	0	0	0	0	0	0	0	0	0	0	0	0	0	0	0	1	0	0	0	0	0	0	0	0	0	0	0	0	0	0	0	0	0	0
CSPP1	0	0	0	0	0	0	0	0	0	0	0	0	0	0	0	0	0	0	0	0	0	0	0	0	0	0	0	0	0	0	1	0	0	0	0	0	0	0	0	0	0	0	0	0	0	0	0	0	0
OR13C5	0	0	0	0	0	0	0	0	0	0	0	0	0	0	0	0	0	0	0	0	0	0	0	0	0	0	0	0	0	0	1	0	0	0	0	0	0	0	0	0	0	0	0	0	0	0	0	0	0
SCGB2A1	0	0	0	0	0	0	0	0	0	0	0	0	0	0	0	0	0	0	0	0	0	0	0	0	0	0	0	0	0	0	1	0	0	0	0	0	0	0	0	0	0	0	0	0	0	0	0	0	0
MARS1	0	0	0	0	0	0	0	0	0	0	0	0	0	0	0	0	0	0	0	0	0	0	0	0	0	0	0	0	0	0	1	0	0	0	0	0	0	0	0	0	0	0	0	0	0	0	0	0	0
CYP19A1	0	0	0	0	0	0	0	0	0	0	0	0	0	0	0	0	0	0	0	0	0	0	0	0	0	0	0	0	0	0	1	0	0	0	0	0	0	0	0	0	0	0	0	0	0	0	0	0	0
SRL	0	0	0	0	0	0	0	0	0	0	0	0	0	0	0	0	0	0	0	0	0	0	0	0	0	0	0	0	0	0	1	0	0	0	0	0	0	1	0	0	0	0	0	0	0	0	0	0	0
ZNF276	0	0	0	0	0	0	0	0	0	0	0	0	0	0	0	0	0	0	0	0	0	0	0	0	0	0	0	0	0	0	1	0	0	0	0	0	0	0	0	0	0	0	0	0	0	0	0	0	0
ACAP1	0	0	0	0	0	0	0	0	0	0	0	0	0	0	0	0	0	0	0	0	0	0	0	0	0	0	0	0	0	0	1	0	0	0	0	0	0	0	0	0	0	0	0	0	0	0	0	0	0
KRI1	0	0	0	0	0	0	0	0	0	0	0	0	0	0	0	0	0	0	0	0	0	0	0	0	0	0	0	0	0	0	1	0	0	0	0	0	0	0	0	0	0	0	0	0	0	0	0	0	0
USP16	0	0	0	0	0	0	0	0	0	0	0	0	0	0	0	0	0	0	0	0	0	0	0	0	0	0	0	0	0	0	1	0	0	0	0	0	0	0	0	0	0	0	0	0	0	0	0	0	0
FOXRED2	0	0	0	0	0	0	0	0	0	0	0	0	0	0	0	0	0	0	0	0	0	0	0	0	0	0	0	0	0	0	1	0	0	0	0	0	0	0	0	0	0	0	0	0	0	0	0	0	0
HDAC10	0	0	0	0	0	0	0	0	0	0	0	0	0	0	0	0	0	0	0	0	0	0	0	0	0	0	0	0	0	0	1	0	0	0	0	0	0	0	0	0	0	0	0	0	0	0	0	0	0
AGMAT	0	0	0	0	0	0	0	0	0	0	0	0	0	0	0	0	0	0	0	0	0	0	0	0	0	0	0	0	0	0	0	1	0	0	0	0	0	0	0	0	0	0	0	0	0	0	0	0	0
TDRD5	0	0	0	0	0	0	0	0	0	0	0	0	0	0	0	0	0	0	0	0	0	0	0	0	0	0	0	0	0	0	0	1	0	0	0	0	0	0	0	0	0	0	0	0	0	0	0	0	0
EGLN1	0	0	0	0	0	0	0	0	0	0	0	0	0	0	0	0	0	0	0	0	0	0	0	0	0	0	0	0	0	0	0	1	0	0	0	0	0	0	0	0	0	0	0	0	0	0	0	0	0
CLK1	0	0	0	0	0	0	0	0	0	0	0	0	0	0	0	0	0	0	0	0	0	0	0	0	0	0	0	0	0	0	0	1	0	0	0	0	0	0	0	0	0	0	0	0	0	0	0	0	0
DNER	0	0	0	0	0	0	0	0	0	0	0	0	0	0	0	0	0	0	0	0	0	0	0	0	0	0	0	0	0	0	0	1	0	0	0	0	0	0	0	0	0	0	0	0	0	0	0	0	0
ASTE1	0	0	0	0	0	0	0	0	0	0	0	0	0	0	0	0	0	0	0	0	0	0	0	0	0	0	0	0	0	0	0	1	0	0	0	0	0	0	0	0	0	0	0	0	0	0	0	0	0
SSR3	0	0	0	0	0	0	0	0	0	0	0	0	0	0	0	0	0	0	0	0	0	0	0	0	0	0	0	0	0	0	0	1	0	0	0	0	0	0	0	0	0	0	0	0	0	0	0	0	0
IFT80	0	0	0	0	0	0	0	0	0	0	0	0	0	0	0	0	0	0	0	0	0	0	0	0	0	0	0	0	0	0	0	1	0	0	0	0	0	0	0	0	0	0	0	0	0	0	0	0	0
TP63	0	0	0	0	0	0	0	0	0	0	0	0	0	0	0	0	0	0	0	0	0	0	0	0	0	0	0	0	0	0	0	1	0	0	0	0	0	0	0	0	0	0	0	0	0	0	0	0	0
CLDN16	0	0	0	0	0	0	0	0	0	0	0	0	0	0	0	0	0	0	0	0	0	0	0	0	0	0	0	0	0	0	0	1	0	0	0	0	0	0	0	0	0	0	0	0	0	0	0	0	0
WDFY3	0	0	0	0	0	0	0	0	0	0	0	0	0	0	0	0	0	0	0	0	0	0	0	0	0	0	0	0	0	0	0	1	0	0	0	0	0	0	0	0	0	0	0	0	0	0	0	0	0
WDR17	0	0	0	0	0	0	0	0	0	0	0	0	0	0	0	0	0	0	0	0	0	0	0	0	0	0	0	0	0	0	0	1	0	0	0	0	0	0	0	0	0	0	0	0	0	0	0	0	0
ZCCHC9	0	0	0	0	0	0	0	0	0	0	0	0	0	0	0	0	0	0	0	0	0	0	0	0	0	0	0	0	0	0	0	1	0	0	0	0	0	0	0	0	0	0	0	0	0	0	0	0	0
PJA2	0	0	0	0	0	0	0	0	0	0	0	0	0	0	0	0	0	0	0	0	0	0	0	0	0	0	0	0	0	0	0	1	0	0	0	0	0	0	0	0	0	0	0	0	0	0	0	0	0
SEMA3D	0	0	0	0	0	0	0	0	0	0	0	0	0	0	0	0	0	0	0	0	0	0	0	0	0	0	0	0	0	0	0	1	0	0	0	0	0	0	0	0	0	0	0	0	0	0	0	0	0
PCM1	0	0	0	0	0	0	0	0	0	0	0	0	0	0	0	0	0	0	0	0	0	0	0	0	0	0	0	0	0	0	0	1	0	0	0	0	0	0	0	0	0	0	0	0	0	0	0	0	0
KCNB2	0	0	0	0	0	0	0	0	0	0	0	0	0	0	0	0	0	0	0	0	0	0	0	0	0	0	0	0	0	0	0	1	0	0	0	0	0	0	0	0	0	0	0	0	0	0	0	0	0
MROH1	0	0	0	0	0	0	0	0	0	0	0	0	0	0	0	0	0	0	0	0	0	0	0	0	0	0	0	0	0	0	0	1	0	0	0	0	0	0	0	0	0	0	0	0	0	0	0	0	0
MCM10	0	0	0	0	0	0	0	0	0	0	0	0	0	0	0	0	0	0	0	0	0	0	0	0	0	0	0	0	0	0	0	1	0	0	0	0	0	0	0	0	0	0	0	0	0	0	0	0	0
CDH23	0	0	0	0	0	0	0	0	0	0	0	0	0	0	0	0	0	0	0	0	0	0	0	0	0	0	0	0	0	0	0	1	0	0	0	0	0	0	0	0	0	0	0	0	0	0	0	0	0
MUC5B	0	0	0	0	0	0	0	0	0	0	0	0	0	0	0	0	0	0	0	0	0	0	0	0	0	0	0	0	0	0	0	1	0	0	0	0	0	0	0	0	0	0	0	0	0	0	0	0	0
CTSW	0	0	0	0	0	0	0	0	0	0	0	0	0	0	0	0	0	0	0	0	0	0	0	0	0	0	0	0	0	0	0	1	0	0	0	0	0	0	0	0	0	0	0	0	0	0	0	0	0
MYL2	0	0	0	0	0	0	0	0	0	0	0	0	0	0	0	0	0	0	0	0	0	0	0	0	0	0	0	0	0	0	0	1	0	0	0	0	0	0	0	0	0	0	0	0	0	0	0	0	0
PPP4R4	0	0	0	0	0	0	0	0	0	0	0	0	0	0	0	0	0	0	0	0	0	0	0	0	0	0	0	0	0	0	0	1	0	0	0	0	0	0	0	0	0	0	0	0	0	0	0	0	0
XYLT1	0	0	0	0	0	0	0	0	0	0	0	0	0	0	0	0	0	0	0	0	0	0	0	0	0	0	0	0	0	0	0	1	0	0	0	0	0	0	0	0	0	0	0	0	0	0	0	0	0
SMARCA4	0	0	0	0	0	0	0	0	0	0	0	0	0	0	0	0	0	0	0	0	0	0	0	0	0	0	0	0	0	0	0	1	0	0	0	0	0	0	0	0	0	0	0	0	0	0	0	0	0
FBXO27	0	0	0	0	0	0	0	0	0	0	0	0	0	0	0	0	0	0	0	0	0	0	0	0	0	0	0	0	0	0	0	1	0	0	0	0	0	0	0	0	0	0	0	0	0	0	0	0	0
PSG2	0	0	0	0	0	0	0	0	0	0	0	0	0	0	0	0	0	0	0	0	0	0	0	0	0	0	0	0	0	0	0	1	0	0	0	0	0	0	0	0	0	0	0	0	0	0	0	0	0
BCL2L12	0	0	0	0	0	0	0	0	0	0	0	0	0	0	0	0	0	0	0	0	0	0	0	0	0	0	0	0	0	0	0	1	0	0	0	0	0	0	0	0	0	0	0	0	0	0	0	0	0
ZNF175	0	0	0	0	0	0	0	0	0	0	0	0	0	0	0	0	0	0	0	0	0	0	0	0	0	0	0	0	0	0	0	1	0	0	0	0	0	0	0	0	0	0	0	0	0	0	0	0	0
PRPS2	0	0	0	0	0	0	0	0	0	0	0	0	0	0	0	0	0	0	0	0	0	0	0	0	0	0	0	0	0	0	0	1	0	0	0	0	0	0	0	0	0	0	0	0	0	0	0	0	0
PATJ	0	0	0	0	0	0	0	0	0	0	0	0	0	0	0	0	0	0	0	0	0	0	0	0	0	0	0	0	0	0	0	0	1	0	0	0	0	0	0	0	0	0	0	0	0	0	0	0	0
ERICH3	0	0	0	0	0	0	0	0	0	0	0	0	0	0	0	0	0	0	0	0	0	0	0	0	0	0	0	0	0	0	0	0	1	0	0	0	0	0	0	0	0	0	0	0	0	0	0	0	0
KCND3	0	0	0	0	0	0	0	0	0	0	0	0	0	0	0	0	0	0	0	0	0	0	0	0	0	0	0	0	0	0	0	0	1	0	0	0	0	0	0	0	0	0	0	0	0	0	0	0	0
PTPN4	0	0	0	0	0	0	0	0	0	0	0	0	0	0	0	0	0	0	0	0	0	0	0	0	0	0	0	0	0	0	0	0	1	0	0	0	0	0	0	0	0	0	0	0	0	0	0	0	0
SAP130	0	0	0	0	0	0	0	0	0	0	0	0	0	0	0	0	0	0	0	0	0	0	0	0	0	0	0	0	0	0	0	0	1	0	0	0	0	0	0	0	0	0	0	0	0	0	0	0	0
RASA1	0	0	0	0	0	0	0	0	0	0	0	0	0	0	0	0	0	0	0	0	0	0	0	0	0	0	0	0	0	0	0	0	1	0	0	0	0	0	0	0	0	0	0	0	0	0	0	0	0
SLC12A2	0	0	0	0	0	0	0	0	0	0	0	0	0	0	0	0	0	0	0	0	0	0	0	0	0	0	0	0	0	0	0	0	1	0	0	0	0	1	0	0	0	0	0	0	0	0	0	0	0
FSTL4	0	0	0	0	0	0	0	0	0	0	0	0	0	0	0	0	0	0	0	0	0	0	0	0	0	0	0	0	0	0	0	0	1	0	0	0	0	0	0	0	0	0	0	0	0	0	0	0	0
PCDHGA1	0	0	0	0	0	0	0	0	0	0	0	0	0	0	0	0	0	0	0	0	0	0	0	0	0	0	0	0	0	0	0	0	1	0	0	1	0	0	0	0	0	0	0	0	0	0	0	0	0
MAGI2	0	0	0	0	0	0	0	0	0	0	0	0	0	0	0	0	0	0	0	0	0	0	0	0	0	0	0	0	0	0	0	0	1	0	0	0	0	0	0	0	0	0	0	0	0	0	0	0	0
GPAA1	0	0	0	0	0	0	0	0	0	0	0	0	0	0	0	0	0	0	0	0	0	0	0	0	0	0	0	0	0	0	0	0	1	0	0	0	0	0	0	0	0	0	0	0	0	0	0	0	0
RRP12	0	0	0	0	0	0	0	0	0	0	0	0	0	0	0	0	0	0	0	0	0	0	0	0	0	0	0	0	0	0	0	0	1	0	0	0	0	0	0	0	0	0	0	0	0	0	0	0	0
MARK2	0	0	0	0	0	0	0	0	0	0	0	0	0	0	0	0	0	0	0	0	0	0	0	0	0	0	0	0	0	0	0	0	1	0	0	0	0	0	0	0	0	0	0	0	0	0	0	0	0
ZNF770	0	0	0	0	0	0	0	0	0	0	0	0	0	0	0	0	0	0	0	0	0	0	0	0	0	0	0	0	0	0	0	0	1	0	0	0	0	0	0	0	0	0	0	0	0	0	0	0	0
ANPEP	0	0	0	0	0	0	0	0	0	0	0	0	0	0	0	0	0	0	0	0	0	0	0	0	0	0	0	0	0	0	0	0	1	0	0	0	0	0	0	0	0	0	0	0	0	0	0	0	0
VWA3A	0	0	0	0	0	0	0	0	0	0	0	0	0	0	0	0	0	0	0	0	0	0	0	0	0	0	0	0	0	0	0	0	1	0	0	0	0	0	0	0	0	0	0	0	0	0	0	0	0
FLCN	0	0	0	0	0	0	0	0	0	0	0	0	0	0	0	0	0	0	0	0	0	0	0	0	0	0	0	0	0	0	0	0	1	0	0	0	0	0	0	0	0	0	0	0	0	0	0	0	0
SPPL2C	0	0	0	0	0	0	0	0	0	0	0	0	0	0	0	0	0	0	0	0	0	0	0	0	0	0	0	0	0	0	0	0	1	0	0	0	0	0	0	0	0	0	0	0	0	0	0	0	0
MC5R	0	0	0	0	0	0	0	0	0	0	0	0	0	0	0	0	0	0	0	0	0	0	0	0	0	0	0	0	0	0	0	0	1	0	0	0	0	0	0	0	0	0	0	0	0	0	0	0	0
DTNA	0	0	0	0	0	0	0	0	0	0	0	0	0	0	0	0	0	0	0	0	0	0	0	0	0	0	0	0	0	0	0	0	1	0	0	0	0	0	0	0	0	0	0	0	0	0	0	0	0
SERPINB5	0	0	0	0	0	0	0	0	0	0	0	0	0	0	0	0	0	0	0	0	0	0	0	0	0	0	0	0	0	0	0	0	1	0	0	0	0	0	0	0	0	0	0	0	0	0	0	0	0
SUPT5H	0	0	0	0	0	0	0	0	0	0	0	0	0	0	0	0	0	0	0	0	0	0	0	0	0	0	0	0	0	0	0	0	1	0	0	0	0	0	0	0	0	0	0	0	0	0	0	0	0
DENND6B	0	0	0	0	0	0	0	0	0	0	0	0	0	0	0	0	0	0	0	0	0	0	0	0	0	0	0	0	0	0	0	0	1	0	0	0	0	0	0	0	0	0	0	0	0	0	0	0	0
C1orf159	0	0	0	0	0	0	0	0	0	0	0	0	0	0	0	0	0	0	0	0	0	0	0	0	0	0	0	0	0	0	0	0	0	1	0	0	0	0	0	0	0	0	0	0	0	0	0	0	0
CROCC	0	0	0	0	0	0	0	0	0	0	0	0	0	0	0	0	0	0	0	0	0	0	0	0	0	0	0	0	0	0	0	0	0	1	0	0	0	0	0	0	0	0	0	0	0	0	0	0	0
RPL11	0	0	0	0	0	0	0	0	0	0	0	0	0	0	0	0	0	0	0	0	0	0	0	0	0	0	0	0	0	0	0	0	0	1	0	0	0	0	0	0	0	0	0	0	0	0	0	0	0
MCOLN3	0	0	0	0	0	0	0	0	0	0	0	0	0	0	0	0	0	0	0	0	0	0	0	0	0	0	0	0	0	0	0	0	0	1	0	0	0	0	0	0	0	0	0	0	0	0	0	0	0
KCNA2	0	0	0	0	0	0	0	0	0	0	0	0	0	0	0	0	0	0	0	0	0	0	0	0	0	0	0	0	0	0	0	0	0	1	0	0	0	0	0	0	0	0	0	0	0	0	0	0	0
ATP8B2	0	0	0	0	0	0	0	0	0	0	0	0	0	0	0	0	0	0	0	0	0	0	0	0	0	0	0	0	0	0	0	0	0	1	0	0	0	0	0	0	0	0	0	0	0	0	0	0	0
PBXIP1	0	0	0	0	0	0	0	0	0	0	0	0	0	0	0	0	0	0	0	0	0	0	0	0	0	0	0	0	0	0	0	0	0	1	0	0	0	0	0	0	0	0	0	0	0	0	0	0	0
CHRM3	0	0	0	0	0	0	0	0	0	0	0	0	0	0	0	0	0	0	0	0	0	0	0	0	0	0	0	0	0	0	0	0	0	1	0	0	0	0	0	0	0	0	0	0	0	0	0	0	0
AFF3	0	0	0	0	0	0	0	0	0	0	0	0	0	0	0	0	0	0	0	0	0	0	0	0	0	0	0	0	0	0	0	0	0	1	0	0	0	0	0	0	0	0	0	0	0	0	0	0	0
WDR33	0	0	0	0	0	0	0	0	0	0	0	0	0	0	0	0	0	0	0	0	0	0	0	0	0	0	0	0	0	0	0	0	0	1	0	0	0	0	0	0	0	0	0	0	0	0	0	1	0
CARF	0	0	0	0	0	0	0	0	0	0	0	0	0	0	0	0	0	0	0	0	0	0	0	0	0	0	0	0	0	0	0	0	0	1	0	0	0	0	0	0	0	0	0	0	0	0	0	0	0
ZFAND2B	0	0	0	0	0	0	0	0	0	0	0	0	0	0	0	0	0	0	0	0	0	0	0	0	0	0	0	0	0	0	0	0	0	1	0	0	0	0	0	0	0	0	0	0	0	0	0	0	0
COL7A1	0	0	0	0	0	0	0	0	0	0	0	0	0	0	0	0	0	0	0	0	0	0	0	0	0	0	0	0	0	0	0	0	0	1	0	1	0	0	0	0	0	0	0	0	0	0	0	0	0
CIP2A	0	0	0	0	0	0	0	0	0	0	0	0	0	0	0	0	0	0	0	0	0	0	0	0	0	0	0	0	0	0	0	0	0	1	0	0	0	0	0	0	0	0	0	0	0	0	0	0	0
RFC1	0	0	0	0	0	0	0	0	0	0	0	0	0	0	0	0	0	0	0	0	0	0	0	0	0	0	0	0	0	0	0	0	0	1	0	0	0	0	0	0	0	0	0	0	0	0	0	0	0
TENT2	0	0	0	0	0	0	0	0	0	0	0	0	0	0	0	0	0	0	0	0	0	0	0	0	0	0	0	0	0	0	0	0	0	1	0	0	0	0	0	0	0	0	0	0	0	0	0	0	0
PHAX	0	0	0	0	0	0	0	0	0	0	0	0	0	0	0	0	0	0	0	0	0	0	0	0	0	0	0	0	0	0	0	0	0	1	0	0	0	0	0	0	0	0	0	0	0	0	0	0	0
ADAMTS19	0	0	0	0	0	0	0	0	0	0	0	0	0	0	0	0	0	0	0	0	0	0	0	0	0	0	0	0	0	0	0	0	0	1	0	0	0	0	0	0	0	0	0	0	0	0	0	0	0
RGL2	0	0	0	0	0	0	0	0	0	0	0	0	0	0	0	0	0	0	0	0	0	0	0	0	0	0	0	0	0	0	0	0	0	1	0	0	0	0	0	0	0	0	0	0	0	0	0	0	0
ZNF318	0	0	0	0	0	0	0	0	0	0	0	0	0	0	0	0	0	0	0	0	0	0	0	0	0	0	0	0	0	0	0	0	0	1	0	0	0	0	0	0	0	0	0	0	0	0	0	0	0
CLIC5	0	0	0	0	0	0	0	0	0	0	0	0	0	0	0	0	0	0	0	0	0	0	0	0	0	0	0	0	0	0	0	0	0	1	0	0	0	0	0	0	0	0	0	0	0	0	0	0	0
THEMIS	0	0	0	0	0	0	0	0	0	0	0	0	0	0	0	0	0	0	0	0	0	0	0	0	0	0	0	0	0	0	0	0	0	1	0	0	0	0	0	0	0	0	0	0	0	0	0	1	0
FIGNL1	0	0	0	0	0	0	0	0	0	0	0	0	0	0	0	0	0	0	0	0	0	0	0	0	0	0	0	0	0	0	0	0	0	1	0	0	0	0	0	0	0	0	0	0	0	0	0	0	0
ZNF479	0	0	0	0	0	0	0	0	0	0	0	0	0	0	0	0	0	0	0	0	0	0	0	0	0	0	0	0	0	0	0	0	0	1	0	0	0	0	0	0	0	0	0	0	0	0	0	0	0
ZNF92	0	0	0	0	0	0	0	0	0	0	0	0	0	0	0	0	0	0	0	0	0	0	0	0	0	0	0	0	0	0	0	0	0	1	0	0	0	0	0	0	0	0	0	0	0	0	0	0	0
GALNT17	0	0	0	0	0	0	0	0	0	0	0	0	0	0	0	0	0	0	0	0	0	0	0	0	0	0	0	0	0	0	0	0	0	1	0	0	0	0	0	0	0	0	0	0	0	0	0	0	0
ANKIB1	0	0	0	0	0	0	0	0	0	0	0	0	0	0	0	0	0	0	0	0	0	0	0	0	0	0	0	0	0	0	0	0	0	1	0	0	0	0	0	0	0	0	0	0	0	0	0	0	0
RELN	0	0	0	0	0	0	0	0	0	0	0	0	0	0	0	0	0	0	0	0	0	0	0	0	0	0	0	0	0	0	0	0	0	1	0	0	0	0	0	0	0	0	0	0	0	0	0	0	0
FAM160B2	0	0	0	0	0	0	0	0	0	0	0	0	0	0	0	0	0	0	0	0	0	0	0	0	0	0	0	0	0	0	0	0	0	1	0	0	0	0	0	0	0	0	0	0	0	0	0	0	0
TEX15	0	0	0	0	0	0	0	0	0	0	0	0	0	0	0	0	0	0	0	0	0	0	0	0	0	0	0	0	0	0	0	0	0	1	0	0	0	0	0	0	0	0	0	0	0	0	1	0	0
PMP2	0	0	0	0	0	0	0	0	0	0	0	0	0	0	0	0	0	0	0	0	0	0	0	0	0	0	0	0	0	0	0	0	0	1	0	0	0	0	0	0	0	0	0	0	0	0	0	0	0
CNBD1	0	0	0	0	0	0	0	0	0	0	0	0	0	0	0	0	0	0	0	0	0	0	0	0	0	0	0	0	0	0	0	0	0	1	0	0	0	0	0	0	0	0	0	0	0	0	0	0	0
TRPS1	0	0	0	0	0	0	0	0	0	0	0	0	0	0	0	0	0	0	0	0	0	0	0	0	0	0	0	0	0	0	0	0	0	1	0	0	0	0	0	0	0	0	0	0	0	0	0	0	0
TLE1	0	0	0	0	0	0	0	0	0	0	0	0	0	0	0	0	0	0	0	0	0	0	0	0	0	0	0	0	0	0	0	0	0	1	0	0	0	0	0	0	0	0	0	0	0	0	0	0	0
NRG3	0	0	0	0	0	0	0	0	0	0	0	0	0	0	0	0	0	0	0	0	0	0	0	0	0	0	0	0	0	0	0	0	0	1	0	0	0	0	0	0	0	0	0	0	0	0	0	0	0
SLF2	0	0	0	0	0	0	0	0	0	0	0	0	0	0	0	0	0	0	0	0	0	0	0	0	0	0	0	0	0	0	0	0	0	1	0	0	0	0	0	0	0	0	0	0	0	0	0	0	0
PTPN5	0	0	0	0	0	0	0	0	0	0	0	0	0	0	0	0	0	0	0	0	0	0	0	0	0	0	0	0	0	0	0	0	0	1	0	0	0	0	0	0	0	0	0	0	0	0	0	0	0
SPA17	0	0	0	0	0	0	0	0	0	0	0	0	0	0	0	0	0	0	0	0	0	0	0	0	0	0	0	0	0	0	0	0	0	1	0	0	0	0	0	0	0	0	0	0	0	0	0	0	0
NELL2	0	0	0	0	0	0	0	0	0	0	0	0	0	0	0	0	0	0	0	0	0	0	0	0	0	0	0	0	0	0	0	0	0	1	0	0	0	0	0	0	0	0	0	0	0	0	0	0	0
SUOX	0	0	0	0	0	0	0	0	0	0	0	0	0	0	0	0	0	0	0	0	0	0	0	0	0	0	0	0	0	0	0	0	0	1	0	0	0	0	0	0	0	0	0	0	0	0	0	0	0
INTS6	0	0	0	0	0	0	0	0	0	0	0	0	0	0	0	0	0	0	0	0	0	0	0	0	0	0	0	0	0	0	0	0	0	1	0	0	0	0	0	0	0	0	0	0	0	0	0	0	0
ATXN2L	0	0	0	0	0	0	0	0	0	0	0	0	0	0	0	0	0	0	0	0	0	0	0	0	0	0	0	0	0	0	0	0	0	1	0	0	0	0	0	0	0	0	0	0	0	0	0	0	0
WFIKKN2	0	0	0	0	0	0	0	0	0	0	0	0	0	0	0	0	0	0	0	0	0	0	0	0	0	0	0	0	0	0	0	0	0	1	0	0	0	0	0	0	0	0	0	0	0	0	0	0	0
TBCD	0	0	0	0	0	0	0	0	0	0	0	0	0	0	0	0	0	0	0	0	0	0	0	0	0	0	0	0	0	0	0	0	0	1	0	0	0	0	0	0	0	0	0	0	0	0	0	0	0
ARHGEF18	0	0	0	0	0	0	0	0	0	0	0	0	0	0	0	0	0	0	0	0	0	0	0	0	0	0	0	0	0	0	0	0	0	1	0	0	0	0	0	0	0	0	0	0	0	0	0	0	0
MCOLN1	0	0	0	0	0	0	0	0	0	0	0	0	0	0	0	0	0	0	0	0	0	0	0	0	0	0	0	0	0	0	0	0	0	1	0	0	0	0	0	0	0	0	0	0	0	0	0	0	0
COPE	0	0	0	0	0	0	0	0	0	0	0	0	0	0	0	0	0	0	0	0	0	0	0	0	0	0	0	0	0	0	0	0	0	1	0	0	0	0	0	0	0	0	0	0	0	0	0	0	0
C19orf47	0	0	0	0	0	0	0	0	0	0	0	0	0	0	0	0	0	0	0	0	0	0	0	0	0	0	0	0	0	0	0	0	0	1	0	0	0	0	0	0	0	0	0	0	0	0	0	0	0
CERK	0	0	0	0	0	0	0	0	0	0	0	0	0	0	0	0	0	0	0	0	0	0	0	0	0	0	0	0	0	0	0	0	0	1	0	0	0	0	0	0	0	0	0	0	0	0	0	0	0
ADGRG2	0	0	0	0	0	0	0	0	0	0	0	0	0	0	0	0	0	0	0	0	0	0	0	0	0	0	0	0	0	0	0	0	0	1	0	0	0	0	0	0	0	0	0	0	0	0	0	0	0
AKAP4	0	0	0	0	0	0	0	0	0	0	0	0	0	0	0	0	0	0	0	0	0	0	0	0	0	0	0	0	0	0	0	0	0	1	0	0	0	0	0	0	0	0	0	0	0	0	0	0	0
USP51	0	0	0	0	0	0	0	0	0	0	0	0	0	0	0	0	0	0	0	0	0	0	0	0	0	0	0	0	0	0	0	0	0	1	0	0	0	0	0	0	0	0	0	0	0	0	0	0	0
CYB5R1	0	0	0	0	0	0	0	0	0	0	0	0	0	0	0	0	0	0	0	0	0	0	0	0	0	0	0	0	0	0	0	0	0	0	1	0	0	0	0	0	0	0	0	0	0	0	0	0	0
PLXNA2	0	0	0	0	0	0	0	0	0	0	0	0	0	0	0	0	0	0	0	0	0	0	0	0	0	0	0	0	0	0	0	0	0	0	1	0	0	0	0	0	0	0	0	0	0	0	0	0	0
EPHX1	0	0	0	0	0	0	0	0	0	0	0	0	0	0	0	0	0	0	0	0	0	0	0	0	0	0	0	0	0	0	0	0	0	0	1	0	0	0	0	0	0	0	0	0	0	0	0	0	0
HEATR1	0	0	0	0	0	0	0	0	0	0	0	0	0	0	0	0	0	0	0	0	0	0	0	0	0	0	0	0	0	0	0	0	0	0	1	0	0	0	0	0	0	0	0	0	0	0	0	0	0
DRC1	0	0	0	0	0	0	0	0	0	0	0	0	0	0	0	0	0	0	0	0	0	0	0	0	0	0	0	0	0	0	0	0	0	0	1	0	0	0	0	0	0	0	0	0	0	0	0	0	0
PRSS45P	0	0	0	0	0	0	0	0	0	0	0	0	0	0	0	0	0	0	0	0	0	0	0	0	0	0	0	0	0	0	0	0	0	0	1	0	0	0	0	0	0	0	0	0	0	0	0	0	0
ELL2	0	0	0	0	0	0	0	0	0	0	0	0	0	0	0	0	0	0	0	0	0	0	0	0	0	0	0	0	0	0	0	0	0	0	1	0	0	0	0	0	0	0	0	0	0	0	0	0	0
TIGD6	0	0	0	0	0	0	0	0	0	0	0	0	0	0	0	0	0	0	0	0	0	0	0	0	0	0	0	0	0	0	0	0	0	0	1	0	0	0	0	0	0	0	0	0	0	0	0	0	0
BTNL8	0	0	0	0	0	0	0	0	0	0	0	0	0	0	0	0	0	0	0	0	0	0	0	0	0	0	0	0	0	0	0	0	0	0	1	0	0	0	0	0	0	0	0	0	0	0	0	0	0
PLIN2	0	0	0	0	0	0	0	0	0	0	0	0	0	0	0	0	0	0	0	0	0	0	0	0	0	0	0	0	0	0	0	0	0	0	1	0	0	0	0	0	0	0	0	0	0	0	0	0	0
UBE2R2	0	0	0	0	0	0	0	0	0	0	0	0	0	0	0	0	0	0	0	0	0	0	0	0	0	0	0	0	0	0	0	0	0	0	1	0	0	0	0	0	0	0	0	0	0	0	0	0	0
TNFSF15	0	0	0	0	0	0	0	0	0	0	0	0	0	0	0	0	0	0	0	0	0	0	0	0	0	0	0	0	0	0	0	0	0	0	1	0	0	0	0	0	0	0	0	0	0	0	0	0	0
FRMPD2	0	0	0	0	0	0	0	0	0	0	0	0	0	0	0	0	0	0	0	0	0	0	0	0	0	0	0	0	0	0	0	0	0	0	1	0	0	0	0	0	0	0	0	0	0	0	0	0	0
BTG4	0	0	0	0	0	0	0	0	0	0	0	0	0	0	0	0	0	0	0	0	0	0	0	0	0	0	0	0	0	0	0	0	0	0	1	0	0	0	0	0	0	0	0	0	0	0	0	0	0
TECTA	0	0	0	0	0	0	0	0	0	0	0	0	0	0	0	0	0	0	0	0	0	0	0	0	0	0	0	0	0	0	0	0	0	0	1	0	0	0	0	0	0	0	0	0	0	0	0	0	0
PLXNC1	0	0	0	0	0	0	0	0	0	0	0	0	0	0	0	0	0	0	0	0	0	0	0	0	0	0	0	0	0	0	0	0	0	0	1	0	0	0	0	0	0	0	0	0	0	0	0	0	0
HAUS4	0	0	0	0	0	0	0	0	0	0	0	0	0	0	0	0	0	0	0	0	0	0	0	0	0	0	0	0	0	0	0	0	0	0	1	0	0	0	0	0	0	0	0	0	0	0	0	0	0
ADCK1	0	0	0	0	0	0	0	0	0	0	0	0	0	0	0	0	0	0	0	0	0	0	0	0	0	0	0	0	0	0	0	0	0	0	1	0	0	0	0	0	0	0	0	0	0	0	0	0	0
HERC2	0	0	0	0	0	0	0	0	0	0	0	0	0	0	0	0	0	0	0	0	0	0	0	0	0	0	0	0	0	0	0	0	0	0	1	0	0	0	0	0	0	0	0	0	0	0	0	0	0
CCDC144A	0	0	0	0	0	0	0	0	0	0	0	0	0	0	0	0	0	0	0	0	0	0	0	0	0	0	0	0	0	0	0	0	0	0	1	0	0	0	0	0	0	0	0	0	0	0	0	0	0
AMOT	0	0	0	0	0	0	0	0	0	0	0	0	0	0	0	0	0	0	0	0	0	0	0	0	0	0	0	0	0	0	0	0	0	0	1	0	0	0	0	0	0	0	0	0	0	0	0	0	0
LAMTOR2	0	0	0	0	0	0	0	0	0	0	0	0	0	0	0	0	0	0	0	0	0	0	0	0	0	0	0	0	0	0	0	0	0	0	0	1	0	0	0	0	0	0	0	0	0	0	0	0	0
CNTN3	0	0	0	0	0	0	0	0	0	0	0	0	0	0	0	0	0	0	0	0	0	0	0	0	0	0	0	0	0	0	0	0	0	0	0	1	0	0	0	0	0	0	0	0	0	0	0	0	0
SEC62	0	0	0	0	0	0	0	0	0	0	0	0	0	0	0	0	0	0	0	0	0	0	0	0	0	0	0	0	0	0	0	0	0	0	0	1	0	0	0	0	0	0	0	0	0	0	0	0	0
ANK2	0	0	0	0	0	0	0	0	0	0	0	0	0	0	0	0	0	0	0	0	0	0	0	0	0	0	0	0	0	0	0	0	0	0	0	1	0	0	0	0	0	0	0	0	0	0	0	0	0
SEMA6A	0	0	0	0	0	0	0	0	0	0	0	0	0	0	0	0	0	0	0	0	0	0	0	0	0	0	0	0	0	0	0	0	0	0	0	1	0	0	0	0	0	0	0	0	0	0	0	0	0
NPC1L1	0	0	0	0	0	0	0	0	0	0	0	0	0	0	0	0	0	0	0	0	0	0	0	0	0	0	0	0	0	0	0	0	0	0	0	1	0	0	0	0	0	0	0	0	0	0	0	0	0
PTPRZ1	0	0	0	0	0	0	0	0	0	0	0	0	0	0	0	0	0	0	0	0	0	0	0	0	0	0	0	0	0	0	0	0	0	0	0	1	0	0	0	0	0	0	0	0	0	0	0	0	0
EXOC4	0	0	0	0	0	0	0	0	0	0	0	0	0	0	0	0	0	0	0	0	0	0	0	0	0	0	0	0	0	0	0	0	0	0	0	1	0	0	0	0	0	0	0	0	0	0	0	0	0
PTPRJ	0	0	0	0	0	0	0	0	0	0	0	0	0	0	0	0	0	0	0	0	0	0	0	0	0	0	0	0	0	0	0	0	0	0	0	1	0	0	0	0	0	0	0	0	0	0	0	0	0
OR4K1	0	0	0	0	0	0	0	0	0	0	0	0	0	0	0	0	0	0	0	0	0	0	0	0	0	0	0	0	0	0	0	0	0	0	0	1	0	0	0	0	0	0	0	0	0	0	0	0	0
BUB1B	0	0	0	0	0	0	0	0	0	0	0	0	0	0	0	0	0	0	0	0	0	0	0	0	0	0	0	0	0	0	0	0	0	0	0	1	0	0	0	0	0	0	0	0	0	0	0	0	0
MFAP1	0	0	0	0	0	0	0	0	0	0	0	0	0	0	0	0	0	0	0	0	0	0	0	0	0	0	0	0	0	0	0	0	0	0	0	1	0	0	0	0	0	0	0	0	0	0	0	0	0
FAM214A	0	0	0	0	0	0	0	0	0	0	0	0	0	0	0	0	0	0	0	0	0	0	0	0	0	0	0	0	0	0	0	0	0	0	0	1	0	0	0	0	0	0	0	0	0	0	0	0	0
ZC3H7A	0	0	0	0	0	0	0	0	0	0	0	0	0	0	0	0	0	0	0	0	0	0	0	0	0	0	0	0	0	0	0	0	0	0	0	1	0	0	0	0	0	0	0	0	0	0	0	0	0
ZNF791	0	0	0	0	0	0	0	0	0	0	0	0	0	0	0	0	0	0	0	0	0	0	0	0	0	0	0	0	0	0	0	0	0	0	0	1	0	0	0	0	0	0	0	0	0	0	0	0	0
KIR2DL1	0	0	0	0	0	0	0	0	0	0	0	0	0	0	0	0	0	0	0	0	0	0	0	0	0	0	0	0	0	0	0	0	0	0	0	1	0	0	0	0	0	0	0	0	0	0	0	0	0
UBOX5	0	0	0	0	0	0	0	0	0	0	0	0	0	0	0	0	0	0	0	0	0	0	0	0	0	0	0	0	0	0	0	0	0	0	0	1	0	0	0	0	0	0	0	0	0	0	0	0	0
CRNKL1	0	0	0	0	0	0	0	0	0	0	0	0	0	0	0	0	0	0	0	0	0	0	0	0	0	0	0	0	0	0	0	0	0	0	0	1	0	0	0	0	0	0	0	0	0	0	0	0	0
DGCR2	0	0	0	0	0	0	0	0	0	0	0	0	0	0	0	0	0	0	0	0	0	0	0	0	0	0	0	0	0	0	0	0	0	0	0	1	0	0	0	0	0	0	0	0	0	0	0	0	0
ARHGEF9	0	0	0	0	0	0	0	0	0	0	0	0	0	0	0	0	0	0	0	0	0	0	0	0	0	0	0	0	0	0	0	0	0	0	0	1	0	0	0	0	0	0	0	0	0	0	0	0	0
ACTR8	0	0	0	0	0	0	0	0	0	0	0	0	0	0	0	0	0	0	0	0	0	0	0	0	0	0	0	0	0	0	0	0	0	0	0	0	1	0	0	0	0	0	0	0	0	0	0	0	0
PKN3	0	0	0	0	0	0	0	0	0	0	0	0	0	0	0	0	0	0	0	0	0	0	0	0	0	0	0	0	0	0	0	0	0	0	0	0	1	0	0	0	0	0	0	0	0	0	0	0	0
SMC3	0	0	0	0	0	0	0	0	0	0	0	0	0	0	0	0	0	0	0	0	0	0	0	0	0	0	0	0	0	0	0	0	0	0	0	0	1	0	0	0	0	0	0	0	0	0	0	0	0
LARP4	0	0	0	0	0	0	0	0	0	0	0	0	0	0	0	0	0	0	0	0	0	0	0	0	0	0	0	0	0	0	0	0	0	0	0	0	1	0	0	0	0	0	0	0	0	0	0	0	0
NCOR2	0	0	0	0	0	0	0	0	0	0	0	0	0	0	0	0	0	0	0	0	0	0	0	0	0	0	0	0	0	0	0	0	0	0	0	0	1	0	0	0	0	0	0	0	0	0	0	0	0
PLP2	0	0	0	0	0	0	0	0	0	0	0	0	0	0	0	0	0	0	0	0	0	0	0	0	0	0	0	0	0	0	0	0	0	0	0	0	1	0	0	0	0	0	0	0	0	0	0	0	0
QPCT	0	0	0	0	0	0	0	0	0	0	0	0	0	0	0	0	0	0	0	0	0	0	0	0	0	0	0	0	0	0	0	0	0	0	0	0	0	1	0	0	0	0	0	0	0	0	0	0	0
TFRC	0	0	0	0	0	0	0	0	0	0	0	0	0	0	0	0	0	0	0	0	0	0	0	0	0	0	0	0	0	0	0	0	0	0	0	0	0	1	0	0	0	0	0	0	0	0	0	0	0
DEPDC7	0	0	0	0	0	0	0	0	0	0	0	0	0	0	0	0	0	0	0	0	0	0	0	0	0	0	0	0	0	0	0	0	0	0	0	0	0	1	0	0	0	0	0	0	0	0	0	0	0
AHNAK	0	0	0	0	0	0	0	0	0	0	0	0	0	0	0	0	0	0	0	0	0	0	0	0	0	0	0	0	0	0	0	0	0	0	0	0	0	1	0	0	0	0	0	0	0	0	0	0	0
DSCAML1	0	0	0	0	0	0	0	0	0	0	0	0	0	0	0	0	0	0	0	0	0	0	0	0	0	0	0	0	0	0	0	0	0	0	0	0	0	1	0	0	0	0	0	0	0	0	0	0	0
KRT85	0	0	0	0	0	0	0	0	0	0	0	0	0	0	0	0	0	0	0	0	0	0	0	0	0	0	0	0	0	0	0	0	0	0	0	0	0	1	0	0	0	0	0	0	0	0	0	0	0
ITGA5	0	0	0	0	0	0	0	0	0	0	0	0	0	0	0	0	0	0	0	0	0	0	0	0	0	0	0	0	0	0	0	0	0	0	0	0	0	1	0	0	0	0	0	0	0	0	0	0	0
TRIM37	0	0	0	0	0	0	0	0	0	0	0	0	0	0	0	0	0	0	0	0	0	0	0	0	0	0	0	0	0	0	0	0	0	0	0	0	0	1	0	0	0	0	0	0	0	0	0	0	0
ATP9A	0	0	0	0	0	0	0	0	0	0	0	0	0	0	0	0	0	0	0	0	0	0	0	0	0	0	0	0	0	0	0	0	0	0	0	0	0	1	0	0	0	0	0	0	0	0	0	0	0
CFAP47	0	0	0	0	0	0	0	0	0	0	0	0	0	0	0	0	0	0	0	0	0	0	0	0	0	0	0	0	0	0	0	0	0	0	0	0	0	1	0	0	0	0	0	0	0	0	0	0	0
BSDC1	0	0	0	0	0	0	0	0	0	0	0	0	0	0	0	0	0	0	0	0	0	0	0	0	0	0	0	0	0	0	0	0	0	0	0	0	0	0	1	0	0	0	0	0	0	0	0	0	0
MIGA1	0	0	0	0	0	0	0	0	0	0	0	0	0	0	0	0	0	0	0	0	0	0	0	0	0	0	0	0	0	0	0	0	0	0	0	0	0	0	1	0	0	0	0	0	0	0	0	0	0
S100A10	0	0	0	0	0	0	0	0	0	0	0	0	0	0	0	0	0	0	0	0	0	0	0	0	0	0	0	0	0	0	0	0	0	0	0	0	0	0	1	0	0	0	0	0	0	0	0	0	0
FLG	0	0	0	0	0	0	0	0	0	0	0	0	0	0	0	0	0	0	0	0	0	0	0	0	0	0	0	0	0	0	0	0	0	0	0	0	0	0	1	0	0	0	0	0	0	0	0	0	0
COPA	0	0	0	0	0	0	0	0	0	0	0	0	0	0	0	0	0	0	0	0	0	0	0	0	0	0	0	0	0	0	0	0	0	0	0	0	0	0	1	0	0	0	0	0	0	0	0	0	0
COP1	0	0	0	0	0	0	0	0	0	0	0	0	0	0	0	0	0	0	0	0	0	0	0	0	0	0	0	0	0	0	0	0	0	0	0	0	0	0	1	0	0	0	0	0	0	0	0	0	0
BRINP2	0	0	0	0	0	0	0	0	0	0	0	0	0	0	0	0	0	0	0	0	0	0	0	0	0	0	0	0	0	0	0	0	0	0	0	0	0	0	1	0	0	0	0	0	0	0	0	0	0
LAMC2	0	0	0	0	0	0	0	0	0	0	0	0	0	0	0	0	0	0	0	0	0	0	0	0	0	0	0	0	0	0	0	0	0	0	0	0	0	0	1	0	0	0	0	0	0	0	0	0	0
PRKD3	0	0	0	0	0	0	0	0	0	0	0	0	0	0	0	0	0	0	0	0	0	0	0	0	0	0	0	0	0	0	0	0	0	0	0	0	0	0	1	0	0	0	0	0	0	0	0	0	0
CATIP	0	0	0	0	0	0	0	0	0	0	0	0	0	0	0	0	0	0	0	0	0	0	0	0	0	0	0	0	0	0	0	0	0	0	0	0	0	0	1	0	0	0	0	0	0	0	0	0	0
LRIG1	0	0	0	0	0	0	0	0	0	0	0	0	0	0	0	0	0	0	0	0	0	0	0	0	0	0	0	0	0	0	0	0	0	0	0	0	0	0	1	0	0	0	0	0	0	0	0	0	0
DROSHA	0	0	0	0	0	0	0	0	0	0	0	0	0	0	0	0	0	0	0	0	0	0	0	0	0	0	0	0	0	0	0	0	0	0	0	0	0	0	1	0	0	0	0	0	0	0	0	0	0
TRIM23	0	0	0	0	0	0	0	0	0	0	0	0	0	0	0	0	0	0	0	0	0	0	0	0	0	0	0	0	0	0	0	0	0	0	0	0	0	0	1	0	0	0	0	0	0	0	0	0	0
PCDHB13	0	0	0	0	0	0	0	0	0	0	0	0	0	0	0	0	0	0	0	0	0	0	0	0	0	0	0	0	0	0	0	0	0	0	0	0	0	0	1	0	0	0	0	0	0	0	0	0	0
OR2H2	0	0	0	0	0	0	0	0	0	0	0	0	0	0	0	0	0	0	0	0	0	0	0	0	0	0	0	0	0	0	0	0	0	0	0	0	0	0	1	0	0	0	0	0	0	0	0	0	0
VARS2	0	0	0	0	0	0	0	0	0	0	0	0	0	0	0	0	0	0	0	0	0	0	0	0	0	0	0	0	0	0	0	0	0	0	0	0	0	0	1	0	0	0	0	0	0	0	0	0	0
CRYBG1	0	0	0	0	0	0	0	0	0	0	0	0	0	0	0	0	0	0	0	0	0	0	0	0	0	0	0	0	0	0	0	0	0	0	0	0	0	0	1	0	0	0	0	0	0	0	0	0	0
ZMIZ2	0	0	0	0	0	0	0	0	0	0	0	0	0	0	0	0	0	0	0	0	0	0	0	0	0	0	0	0	0	0	0	0	0	0	0	0	0	0	1	0	0	0	0	0	0	0	0	0	0
ZNF398	0	0	0	0	0	0	0	0	0	0	0	0	0	0	0	0	0	0	0	0	0	0	0	0	0	0	0	0	0	0	0	0	0	0	0	0	0	0	1	0	0	0	0	0	0	0	0	0	0
AGAP3	0	0	0	0	0	0	0	0	0	0	0	0	0	0	0	0	0	0	0	0	0	0	0	0	0	0	0	0	0	0	0	0	0	0	0	0	0	0	1	0	0	0	0	0	0	0	0	0	0
GRIN1	0	0	0	0	0	0	0	0	0	0	0	0	0	0	0	0	0	0	0	0	0	0	0	0	0	0	0	0	0	0	0	0	0	0	0	0	0	0	1	0	0	0	0	0	0	0	0	0	0
NMT2	0	0	0	0	0	0	0	0	0	0	0	0	0	0	0	0	0	0	0	0	0	0	0	0	0	0	0	0	0	0	0	0	0	0	0	0	0	0	1	0	0	0	0	0	0	0	0	0	0
B4GALNT4	0	0	0	0	0	0	0	0	0	0	0	0	0	0	0	0	0	0	0	0	0	0	0	0	0	0	0	0	0	0	0	0	0	0	0	0	0	0	1	0	0	0	0	0	0	0	0	0	0
CDK8	0	0	0	0	0	0	0	0	0	0	0	0	0	0	0	0	0	0	0	0	0	0	0	0	0	0	0	0	0	0	0	0	0	0	0	0	0	0	1	0	0	0	0	0	0	0	0	0	0
BIVM-ERCC5	0	0	0	0	0	0	0	0	0	0	0	0	0	0	0	0	0	0	0	0	0	0	0	0	0	0	0	0	0	0	0	0	0	0	0	0	0	0	1	0	0	0	0	0	0	0	0	0	0
FSCB	0	0	0	0	0	0	0	0	0	0	0	0	0	0	0	0	0	0	0	0	0	0	0	0	0	0	0	0	0	0	0	0	0	0	0	0	0	0	1	0	0	0	0	0	0	0	0	0	0
BCL2A1	0	0	0	0	0	0	0	0	0	0	0	0	0	0	0	0	0	0	0	0	0	0	0	0	0	0	0	0	0	0	0	0	0	0	0	0	0	0	1	0	1	0	0	0	0	0	0	0	0
PRPF8	0	0	0	0	0	0	0	0	0	0	0	0	0	0	0	0	0	0	0	0	0	0	0	0	0	0	0	0	0	0	0	0	0	0	0	0	0	0	1	0	0	0	0	0	0	0	0	0	0
NLE1	0	0	0	0	0	0	0	0	0	0	0	0	0	0	0	0	0	0	0	0	0	0	0	0	0	0	0	0	0	0	0	0	0	0	0	0	0	0	1	0	0	0	0	0	0	0	0	0	0
THRA	0	0	0	0	0	0	0	0	0	0	0	0	0	0	0	0	0	0	0	0	0	0	0	0	0	0	0	0	0	0	0	0	0	0	0	0	0	0	1	0	0	0	0	0	0	0	0	0	0
MYO5B	0	0	0	0	0	0	0	0	0	0	0	0	0	0	0	0	0	0	0	0	0	0	0	0	0	0	0	0	0	0	0	0	0	0	0	0	0	0	1	0	0	0	0	0	0	0	0	0	0
ZNF407	0	0	0	0	0	0	0	0	0	0	0	0	0	0	0	0	0	0	0	0	0	0	0	0	0	0	0	0	0	0	0	0	0	0	0	0	0	0	1	0	0	0	0	0	0	0	0	0	0
ZNF491	0	0	0	0	0	0	0	0	0	0	0	0	0	0	0	0	0	0	0	0	0	0	0	0	0	0	0	0	0	0	0	0	0	0	0	0	0	0	1	0	0	0	0	0	0	0	0	0	0
MACROD2	0	0	0	0	0	0	0	0	0	0	0	0	0	0	0	0	0	0	0	0	0	0	0	0	0	0	0	0	0	0	0	0	0	0	0	0	0	0	1	0	0	0	0	0	0	0	0	0	0
MYBL2	0	0	0	0	0	0	0	0	0	0	0	0	0	0	0	0	0	0	0	0	0	0	0	0	0	0	0	0	0	0	0	0	0	0	0	0	0	0	1	0	0	0	0	0	0	0	0	0	0
ZFP64	0	0	0	0	0	0	0	0	0	0	0	0	0	0	0	0	0	0	0	0	0	0	0	0	0	0	0	0	0	0	0	0	0	0	0	0	0	0	1	0	0	0	0	0	0	0	0	0	0
SREBF2	0	0	0	0	0	0	0	0	0	0	0	0	0	0	0	0	0	0	0	0	0	0	0	0	0	0	0	0	0	0	0	0	0	0	0	0	0	0	1	0	0	0	0	0	0	0	0	0	0
FBLN1	0	0	0	0	0	0	0	0	0	0	0	0	0	0	0	0	0	0	0	0	0	0	0	0	0	0	0	0	0	0	0	0	0	0	0	0	0	0	1	0	0	0	0	0	0	0	0	0	0
ANKRD34A	0	0	0	0	0	0	0	0	0	0	0	0	0	0	0	0	0	0	0	0	0	0	0	0	0	0	0	0	0	0	0	0	0	0	0	0	0	0	0	1	0	0	0	0	0	0	0	0	0
SLC30A1	0	0	0	0	0	0	0	0	0	0	0	0	0	0	0	0	0	0	0	0	0	0	0	0	0	0	0	0	0	0	0	0	0	0	0	0	0	0	0	1	0	0	0	0	0	0	0	0	0
CAPN2	0	0	0	0	0	0	0	0	0	0	0	0	0	0	0	0	0	0	0	0	0	0	0	0	0	0	0	0	0	0	0	0	0	0	0	0	0	0	0	1	0	0	0	0	0	0	0	0	0
USP37	0	0	0	0	0	0	0	0	0	0	0	0	0	0	0	0	0	0	0	0	0	0	0	0	0	0	0	0	0	0	0	0	0	0	0	0	0	0	0	1	0	0	0	0	0	0	0	0	0
CAPN10	0	0	0	0	0	0	0	0	0	0	0	0	0	0	0	0	0	0	0	0	0	0	0	0	0	0	0	0	0	0	0	0	0	0	0	0	0	0	0	1	0	0	0	0	0	0	0	0	0
TBC1D5	0	0	0	0	0	0	0	0	0	0	0	0	0	0	0	0	0	0	0	0	0	0	0	0	0	0	0	0	0	0	0	0	0	0	0	0	0	0	0	1	0	0	0	0	0	0	0	0	0
KCNH8	0	0	0	0	0	0	0	0	0	0	0	0	0	0	0	0	0	0	0	0	0	0	0	0	0	0	0	0	0	0	0	0	0	0	0	0	0	0	0	1	0	0	0	0	0	0	0	0	0
OTOL1	0	0	0	0	0	0	0	0	0	0	0	0	0	0	0	0	0	0	0	0	0	0	0	0	0	0	0	0	0	0	0	0	0	0	0	0	0	0	0	1	0	0	0	0	0	0	0	0	0
IRX1	0	0	0	0	0	0	0	0	0	0	0	0	0	0	0	0	0	0	0	0	0	0	0	0	0	0	0	0	0	0	0	0	0	0	0	0	0	0	0	1	0	0	0	0	0	0	0	0	0
C7	0	0	0	0	0	0	0	0	0	0	0	0	0	0	0	0	0	0	0	0	0	0	0	0	0	0	0	0	0	0	0	0	0	0	0	0	0	0	0	1	0	0	0	0	0	0	0	0	0
FER	0	0	0	0	0	0	0	0	0	0	0	0	0	0	0	0	0	0	0	0	0	0	0	0	0	0	0	0	0	0	0	0	0	0	0	0	0	0	0	1	0	0	0	0	0	0	0	0	0
NSD1	0	0	0	0	0	0	0	0	0	0	0	0	0	0	0	0	0	0	0	0	0	0	0	0	0	0	0	0	0	0	0	0	0	0	0	0	0	0	0	1	0	0	0	0	0	0	0	0	0
OCM	0	0	0	0	0	0	0	0	0	0	0	0	0	0	0	0	0	0	0	0	0	0	0	0	0	0	0	0	0	0	0	0	0	0	0	0	0	0	0	1	0	0	0	0	0	0	0	0	0
LMTK2	0	0	0	0	0	0	0	0	0	0	0	0	0	0	0	0	0	0	0	0	0	0	0	0	0	0	0	0	0	0	0	0	0	0	0	0	0	0	0	1	0	0	0	0	0	0	0	0	0
EIF3E	0	0	0	0	0	0	0	0	0	0	0	0	0	0	0	0	0	0	0	0	0	0	0	0	0	0	0	0	0	0	0	0	0	0	0	0	0	0	0	1	0	0	0	0	0	0	0	0	0
MFSD14B	0	0	0	0	0	0	0	0	0	0	0	0	0	0	0	0	0	0	0	0	0	0	0	0	0	0	0	0	0	0	0	0	0	0	0	0	0	0	0	1	0	0	0	0	0	0	0	0	0
BIN2	0	0	0	0	0	0	0	0	0	0	0	0	0	0	0	0	0	0	0	0	0	0	0	0	0	0	0	0	0	0	0	0	0	0	0	0	0	0	0	1	0	0	0	0	0	0	0	0	0
OAS2	0	0	0	0	0	0	0	0	0	0	0	0	0	0	0	0	0	0	0	0	0	0	0	0	0	0	0	0	0	0	0	0	0	0	0	0	0	0	0	1	0	0	0	0	0	0	0	0	0
AKAP11	0	0	0	0	0	0	0	0	0	0	0	0	0	0	0	0	0	0	0	0	0	0	0	0	0	0	0	0	0	0	0	0	0	0	0	0	0	0	0	1	0	0	0	0	0	0	0	0	0
COG3	0	0	0	0	0	0	0	0	0	0	0	0	0	0	0	0	0	0	0	0	0	0	0	0	0	0	0	0	0	0	0	0	0	0	0	0	0	0	0	1	0	0	0	0	0	0	0	0	0
TMCO3	0	0	0	0	0	0	0	0	0	0	0	0	0	0	0	0	0	0	0	0	0	0	0	0	0	0	0	0	0	0	0	0	0	0	0	0	0	0	0	1	0	0	0	0	0	0	0	0	0
FAM161B	0	0	0	0	0	0	0	0	0	0	0	0	0	0	0	0	0	0	0	0	0	0	0	0	0	0	0	0	0	0	0	0	0	0	0	0	0	0	0	1	0	0	0	0	0	0	0	0	0
EZH1	0	0	0	0	0	0	0	0	0	0	0	0	0	0	0	0	0	0	0	0	0	0	0	0	0	0	0	0	0	0	0	0	0	0	0	0	0	0	0	1	0	0	0	0	0	0	0	0	0
NMT1	0	0	0	0	0	0	0	0	0	0	0	0	0	0	0	0	0	0	0	0	0	0	0	0	0	0	0	0	0	0	0	0	0	0	0	0	0	0	0	1	0	0	0	0	0	0	0	0	0
SAFB	0	0	0	0	0	0	0	0	0	0	0	0	0	0	0	0	0	0	0	0	0	0	0	0	0	0	0	0	0	0	0	0	0	0	0	0	0	0	0	1	0	0	0	0	0	0	0	0	0
ZNF430	0	0	0	0	0	0	0	0	0	0	0	0	0	0	0	0	0	0	0	0	0	0	0	0	0	0	0	0	0	0	0	0	0	0	0	0	0	0	0	1	0	0	0	0	0	0	0	0	0
ZNF257	0	0	0	0	0	0	0	0	0	0	0	0	0	0	0	0	0	0	0	0	0	0	0	0	0	0	0	0	0	0	0	0	0	0	0	0	0	0	0	1	0	0	0	0	0	0	0	0	0
ZNF460	0	0	0	0	0	0	0	0	0	0	0	0	0	0	0	0	0	0	0	0	0	0	0	0	0	0	0	0	0	0	0	0	0	0	0	0	0	0	0	1	0	0	0	0	0	0	0	0	0
TAB1	0	0	0	0	0	0	0	0	0	0	0	0	0	0	0	0	0	0	0	0	0	0	0	0	0	0	0	0	0	0	0	0	0	0	0	0	0	0	0	1	0	0	0	0	0	0	0	0	0
XK	0	0	0	0	0	0	0	0	0	0	0	0	0	0	0	0	0	0	0	0	0	0	0	0	0	0	0	0	0	0	0	0	0	0	0	0	0	0	0	1	0	0	0	0	0	0	0	0	0
WRAP73	0	0	0	0	0	0	0	0	0	0	0	0	0	0	0	0	0	0	0	0	0	0	0	0	0	0	0	0	0	0	0	0	0	0	0	0	0	0	0	0	1	0	0	0	0	0	0	0	0
DNAJC11	0	0	0	0	0	0	0	0	0	0	0	0	0	0	0	0	0	0	0	0	0	0	0	0	0	0	0	0	0	0	0	0	0	0	0	0	0	0	0	0	1	0	0	0	0	0	0	0	0
DDX20	0	0	0	0	0	0	0	0	0	0	0	0	0	0	0	0	0	0	0	0	0	0	0	0	0	0	0	0	0	0	0	0	0	0	0	0	0	0	0	0	1	0	0	0	0	0	0	0	0
DPT	0	0	0	0	0	0	0	0	0	0	0	0	0	0	0	0	0	0	0	0	0	0	0	0	0	0	0	0	0	0	0	0	0	0	0	0	0	0	0	0	1	0	0	0	0	0	0	0	0
KIF14	0	0	0	0	0	0	0	0	0	0	0	0	0	0	0	0	0	0	0	0	0	0	0	0	0	0	0	0	0	0	0	0	0	0	0	0	0	0	0	0	1	0	0	0	0	0	0	0	0
REN	0	0	0	0	0	0	0	0	0	0	0	0	0	0	0	0	0	0	0	0	0	0	0	0	0	0	0	0	0	0	0	0	0	0	0	0	0	0	0	0	1	0	0	0	0	0	0	0	0
NEUROD1	0	0	0	0	0	0	0	0	0	0	0	0	0	0	0	0	0	0	0	0	0	0	0	0	0	0	0	0	0	0	0	0	0	0	0	0	0	0	0	0	1	0	0	0	0	0	0	0	0
ERBB4	0	0	0	0	0	0	0	0	0	0	0	0	0	0	0	0	0	0	0	0	0	0	0	0	0	0	0	0	0	0	0	0	0	0	0	0	0	0	0	0	1	0	0	0	0	0	0	0	0
SPEG	0	0	0	0	0	0	0	0	0	0	0	0	0	0	0	0	0	0	0	0	0	0	0	0	0	0	0	0	0	0	0	0	0	0	0	0	0	0	0	0	1	0	0	0	0	0	0	0	0
CUL3	0	0	0	0	0	0	0	0	0	0	0	0	0	0	0	0	0	0	0	0	0	0	0	0	0	0	0	0	0	0	0	0	0	0	0	0	0	0	0	0	1	0	0	0	0	0	0	0	0
USP40	0	0	0	0	0	0	0	0	0	0	0	0	0	0	0	0	0	0	0	0	0	0	0	0	0	0	0	0	0	0	0	0	0	0	0	0	0	0	0	0	1	0	0	0	0	0	0	0	0
PTH1R	0	0	0	0	0	0	0	0	0	0	0	0	0	0	0	0	0	0	0	0	0	0	0	0	0	0	0	0	0	0	0	0	0	0	0	0	0	0	0	0	1	0	0	0	0	0	0	0	0
SPCS1	0	0	0	0	0	0	0	0	0	0	0	0	0	0	0	0	0	0	0	0	0	0	0	0	0	0	0	0	0	0	0	0	0	0	0	0	0	0	0	0	1	0	0	0	0	0	0	0	0
ADH5	0	0	0	0	0	0	0	0	0	0	0	0	0	0	0	0	0	0	0	0	0	0	0	0	0	0	0	0	0	0	0	0	0	0	0	0	0	0	0	0	1	0	0	0	0	0	0	0	0
TRIO	0	0	0	0	0	0	0	0	0	0	0	0	0	0	0	0	0	0	0	0	0	0	0	0	0	0	0	0	0	0	0	0	0	0	0	0	0	0	0	0	1	0	0	0	0	0	0	0	0
HCN1	0	0	0	0	0	0	0	0	0	0	0	0	0	0	0	0	0	0	0	0	0	0	0	0	0	0	0	0	0	0	0	0	0	0	0	0	0	0	0	0	1	0	0	0	0	0	0	0	0
MSH3	0	0	0	0	0	0	0	0	0	0	0	0	0	0	0	0	0	0	0	0	0	0	0	0	0	0	0	0	0	0	0	0	0	0	0	0	0	0	0	0	1	0	0	0	0	0	0	0	0
LVRN	0	0	0	0	0	0	0	0	0	0	0	0	0	0	0	0	0	0	0	0	0	0	0	0	0	0	0	0	0	0	0	0	0	0	0	0	0	0	0	0	1	0	0	0	0	0	0	0	0
ARID1B	0	0	0	0	0	0	0	0	0	0	0	0	0	0	0	0	0	0	0	0	0	0	0	0	0	0	0	0	0	0	0	0	0	0	0	0	0	0	0	0	1	0	0	0	0	0	0	0	0
TULP4	0	0	0	0	0	0	0	0	0	0	0	0	0	0	0	0	0	0	0	0	0	0	0	0	0	0	0	0	0	0	0	0	0	0	0	0	0	0	0	0	1	0	0	0	0	0	0	0	0
NME8	0	0	0	0	0	0	0	0	0	0	0	0	0	0	0	0	0	0	0	0	0	0	0	0	0	0	0	0	0	0	0	0	0	0	0	0	0	0	0	0	1	0	0	0	0	0	0	0	0
TPST1	0	0	0	0	0	0	0	0	0	0	0	0	0	0	0	0	0	0	0	0	0	0	0	0	0	0	0	0	0	0	0	0	0	0	0	0	0	0	0	0	1	0	0	0	0	0	0	0	0
ZFAT	0	0	0	0	0	0	0	0	0	0	0	0	0	0	0	0	0	0	0	0	0	0	0	0	0	0	0	0	0	0	0	0	0	0	0	0	0	0	0	0	1	0	0	0	0	0	0	0	0
EGFL7	0	0	0	0	0	0	0	0	0	0	0	0	0	0	0	0	0	0	0	0	0	0	0	0	0	0	0	0	0	0	0	0	0	0	0	0	0	0	0	0	1	0	0	0	0	0	0	0	0
ITGB1	0	0	0	0	0	0	0	0	0	0	0	0	0	0	0	0	0	0	0	0	0	0	0	0	0	0	0	0	0	0	0	0	0	0	0	0	0	0	0	0	1	0	0	0	0	0	0	0	0
PLAU	0	0	0	0	0	0	0	0	0	0	0	0	0	0	0	0	0	0	0	0	0	0	0	0	0	0	0	0	0	0	0	0	0	0	0	0	0	0	0	0	1	0	0	0	0	0	0	0	0
TNKS2	0	0	0	0	0	0	0	0	0	0	0	0	0	0	0	0	0	0	0	0	0	0	0	0	0	0	0	0	0	0	0	0	0	0	0	0	0	0	0	0	1	0	0	0	0	0	0	0	0
KCNA4	0	0	0	0	0	0	0	0	0	0	0	0	0	0	0	0	0	0	0	0	0	0	0	0	0	0	0	0	0	0	0	0	0	0	0	0	0	0	0	0	1	0	0	0	0	0	0	0	0
ERP27	0	0	0	0	0	0	0	0	0	0	0	0	0	0	0	0	0	0	0	0	0	0	0	0	0	0	0	0	0	0	0	0	0	0	0	0	0	0	0	0	1	0	0	0	0	0	0	0	0
COL2A1	0	0	0	0	0	0	0	0	0	0	0	0	0	0	0	0	0	0	0	0	0	0	0	0	0	0	0	0	0	0	0	0	0	0	0	0	0	0	0	0	1	0	0	0	0	0	0	0	0
NUP37	0	0	0	0	0	0	0	0	0	0	0	0	0	0	0	0	0	0	0	0	0	0	0	0	0	0	0	0	0	0	0	0	0	0	0	0	0	0	0	0	1	0	0	0	0	0	0	0	0
VIPAS39	0	0	0	0	0	0	0	0	0	0	0	0	0	0	0	0	0	0	0	0	0	0	0	0	0	0	0	0	0	0	0	0	0	0	0	0	0	0	0	0	1	0	0	0	0	0	0	0	0
TGM7	0	0	0	0	0	0	0	0	0	0	0	0	0	0	0	0	0	0	0	0	0	0	0	0	0	0	0	0	0	0	0	0	0	0	0	0	0	0	0	0	1	0	0	0	0	0	0	0	0
MRTFB	0	0	0	0	0	0	0	0	0	0	0	0	0	0	0	0	0	0	0	0	0	0	0	0	0	0	0	0	0	0	0	0	0	0	0	0	0	0	0	0	1	0	0	0	0	1	0	0	0
N4BP1	0	0	0	0	0	0	0	0	0	0	0	0	0	0	0	0	0	0	0	0	0	0	0	0	0	0	0	0	0	0	0	0	0	0	0	0	0	0	0	0	1	0	0	0	0	0	0	0	0
CES2	0	0	0	0	0	0	0	0	0	0	0	0	0	0	0	0	0	0	0	0	0	0	0	0	0	0	0	0	0	0	0	0	0	0	0	0	0	0	0	0	1	0	0	0	0	0	0	0	0
METTL16	0	0	0	0	0	0	0	0	0	0	0	0	0	0	0	0	0	0	0	0	0	0	0	0	0	0	0	0	0	0	0	0	0	0	0	0	0	0	0	0	1	0	0	0	0	0	0	0	0
DLX3	0	0	0	0	0	0	0	0	0	0	0	0	0	0	0	0	0	0	0	0	0	0	0	0	0	0	0	0	0	0	0	0	0	0	0	0	0	0	0	0	1	0	0	0	0	0	0	0	0
RHBDF2	0	0	0	0	0	0	0	0	0	0	0	0	0	0	0	0	0	0	0	0	0	0	0	0	0	0	0	0	0	0	0	0	0	0	0	0	0	0	0	0	1	0	0	0	0	0	0	0	0
HGS	0	0	0	0	0	0	0	0	0	0	0	0	0	0	0	0	0	0	0	0	0	0	0	0	0	0	0	0	0	0	0	0	0	0	0	0	0	0	0	0	1	0	0	0	0	0	0	0	0
ALYREF	0	0	0	0	0	0	0	0	0	0	0	0	0	0	0	0	0	0	0	0	0	0	0	0	0	0	0	0	0	0	0	0	0	0	0	0	0	0	0	0	1	0	0	0	0	0	0	0	0
PLEKHJ1	0	0	0	0	0	0	0	0	0	0	0	0	0	0	0	0	0	0	0	0	0	0	0	0	0	0	0	0	0	0	0	0	0	0	0	0	0	0	0	0	1	0	0	0	0	0	0	0	0
SLC25A23	0	0	0	0	0	0	0	0	0	0	0	0	0	0	0	0	0	0	0	0	0	0	0	0	0	0	0	0	0	0	0	0	0	0	0	0	0	0	0	0	1	0	0	0	0	0	0	0	0
MYO1F	0	0	0	0	0	0	0	0	0	0	0	0	0	0	0	0	0	0	0	0	0	0	0	0	0	0	0	0	0	0	0	0	0	0	0	0	0	0	0	0	1	0	0	0	0	0	0	1	0
MRPS12	0	0	0	0	0	0	0	0	0	0	0	0	0	0	0	0	0	0	0	0	0	0	0	0	0	0	0	0	0	0	0	0	0	0	0	0	0	0	0	0	1	0	0	0	0	0	0	0	0
SAMHD1	0	0	0	0	0	0	0	0	0	0	0	0	0	0	0	0	0	0	0	0	0	0	0	0	0	0	0	0	0	0	0	0	0	0	0	0	0	0	0	0	1	0	0	0	0	0	0	0	0
WFDC8	0	0	0	0	0	0	0	0	0	0	0	0	0	0	0	0	0	0	0	0	0	0	0	0	0	0	0	0	0	0	0	0	0	0	0	0	0	0	0	0	1	0	0	0	0	0	0	0	0
CHEK2	0	0	0	0	0	0	0	0	0	0	0	0	0	0	0	0	0	0	0	0	0	0	0	0	0	0	0	0	0	0	0	0	0	0	0	0	0	0	0	0	1	0	0	0	0	0	0	0	0
RPS19BP1	0	0	0	0	0	0	0	0	0	0	0	0	0	0	0	0	0	0	0	0	0	0	0	0	0	0	0	0	0	0	0	0	0	0	0	0	0	0	0	0	1	0	0	0	0	0	0	0	0
SEMA4A	0	0	0	0	0	0	0	0	0	0	0	0	0	0	0	0	0	0	0	0	0	0	0	0	0	0	0	0	0	0	0	0	0	0	0	0	0	0	0	0	0	1	0	0	0	0	0	0	0
TRIM67	0	0	0	0	0	0	0	0	0	0	0	0	0	0	0	0	0	0	0	0	0	0	0	0	0	0	0	0	0	0	0	0	0	0	0	0	0	0	0	0	0	1	0	0	0	0	0	0	0
RYR2	0	0	0	0	0	0	0	0	0	0	0	0	0	0	0	0	0	0	0	0	0	0	0	0	0	0	0	0	0	0	0	0	0	0	0	0	0	0	0	0	0	1	0	0	0	0	0	0	0
SLC30A3	0	0	0	0	0	0	0	0	0	0	0	0	0	0	0	0	0	0	0	0	0	0	0	0	0	0	0	0	0	0	0	0	0	0	0	0	0	0	0	0	0	1	0	0	0	0	0	0	0
ACTG2	0	0	0	0	0	0	0	0	0	0	0	0	0	0	0	0	0	0	0	0	0	0	0	0	0	0	0	0	0	0	0	0	0	0	0	0	0	0	0	0	0	1	0	0	0	0	0	0	0
IGKV1-16	0	0	0	0	0	0	0	0	0	0	0	0	0	0	0	0	0	0	0	0	0	0	0	0	0	0	0	0	0	0	0	0	0	0	0	0	0	0	0	0	0	1	0	0	0	0	0	0	0
IGKV1D-16	0	0	0	0	0	0	0	0	0	0	0	0	0	0	0	0	0	0	0	0	0	0	0	0	0	0	0	0	0	0	0	0	0	0	0	0	0	0	0	0	0	1	0	0	0	0	0	0	0
PLEKHM3	0	0	0	0	0	0	0	0	0	0	0	0	0	0	0	0	0	0	0	0	0	0	0	0	0	0	0	0	0	0	0	0	0	0	0	0	0	0	0	0	0	1	0	0	0	0	0	0	0
FARP2	0	0	0	0	0	0	0	0	0	0	0	0	0	0	0	0	0	0	0	0	0	0	0	0	0	0	0	0	0	0	0	0	0	0	0	0	0	0	0	0	0	1	0	0	0	0	0	0	0
PCDHAC2	0	0	0	0	0	0	0	0	0	0	0	0	0	0	0	0	0	0	0	0	0	0	0	0	0	0	0	0	0	0	0	0	0	0	0	0	0	0	0	0	0	1	0	0	0	0	0	0	0
EIF2AK1	0	0	0	0	0	0	0	0	0	0	0	0	0	0	0	0	0	0	0	0	0	0	0	0	0	0	0	0	0	0	0	0	0	0	0	0	0	0	0	0	0	1	0	0	0	0	0	0	0
OGDH	0	0	0	0	0	0	0	0	0	0	0	0	0	0	0	0	0	0	0	0	0	0	0	0	0	0	0	0	0	0	0	0	0	0	0	0	0	0	0	0	0	1	0	0	0	0	0	0	0
BMT2	0	0	0	0	0	0	0	0	0	0	0	0	0	0	0	0	0	0	0	0	0	0	0	0	0	0	0	0	0	0	0	0	0	0	0	0	0	0	0	0	0	1	0	0	0	0	0	0	0
NPAS4	0	0	0	0	0	0	0	0	0	0	0	0	0	0	0	0	0	0	0	0	0	0	0	0	0	0	0	0	0	0	0	0	0	0	0	0	0	0	0	0	0	1	0	0	0	0	0	0	0
NAALAD2	0	0	0	0	0	0	0	0	0	0	0	0	0	0	0	0	0	0	0	0	0	0	0	0	0	0	0	0	0	0	0	0	0	0	0	0	0	0	0	0	0	1	0	0	0	0	0	0	0
TREH	0	0	0	0	0	0	0	0	0	0	0	0	0	0	0	0	0	0	0	0	0	0	0	0	0	0	0	0	0	0	0	0	0	0	0	0	0	0	0	0	0	1	0	0	0	0	0	0	0
GRIP1	0	0	0	0	0	0	0	0	0	0	0	0	0	0	0	0	0	0	0	0	0	0	0	0	0	0	0	0	0	0	0	0	0	0	0	0	0	0	0	0	0	1	0	0	0	0	0	0	0
IGHV1-45	0	0	0	0	0	0	0	0	0	0	0	0	0	0	0	0	0	0	0	0	0	0	0	0	0	0	0	0	0	0	0	0	0	0	0	0	0	0	0	0	0	1	0	0	0	0	0	0	0
FES	0	0	0	0	0	0	0	0	0	0	0	0	0	0	0	0	0	0	0	0	0	0	0	0	0	0	0	0	0	0	0	0	0	0	0	0	0	0	0	0	0	1	0	0	0	0	0	0	0
GLG1	0	0	0	0	0	0	0	0	0	0	0	0	0	0	0	0	0	0	0	0	0	0	0	0	0	0	0	0	0	0	0	0	0	0	0	0	0	0	0	0	0	1	0	0	0	0	0	0	0
RPAIN	0	0	0	0	0	0	0	0	0	0	0	0	0	0	0	0	0	0	0	0	0	0	0	0	0	0	0	0	0	0	0	0	0	0	0	0	0	0	0	0	0	1	0	0	0	0	0	0	0
FAM83G	0	0	0	0	0	0	0	0	0	0	0	0	0	0	0	0	0	0	0	0	0	0	0	0	0	0	0	0	0	0	0	0	0	0	0	0	0	0	0	0	0	1	0	0	0	0	0	0	0
PTBP1	0	0	0	0	0	0	0	0	0	0	0	0	0	0	0	0	0	0	0	0	0	0	0	0	0	0	0	0	0	0	0	0	0	0	0	0	0	0	0	0	0	1	0	0	0	0	0	0	0
PIP5K1C	0	0	0	0	0	0	0	0	0	0	0	0	0	0	0	0	0	0	0	0	0	0	0	0	0	0	0	0	0	0	0	0	0	0	0	0	0	0	0	0	0	1	0	0	0	0	0	0	0
ZNF285	0	0	0	0	0	0	0	0	0	0	0	0	0	0	0	0	0	0	0	0	0	0	0	0	0	0	0	0	0	0	0	0	0	0	0	0	0	0	0	0	0	1	0	0	0	0	0	0	0
PTPRT	0	0	0	0	0	0	0	0	0	0	0	0	0	0	0	0	0	0	0	0	0	0	0	0	0	0	0	0	0	0	0	0	0	0	0	0	0	0	0	0	0	1	0	0	0	0	0	0	0
CTSA	0	0	0	0	0	0	0	0	0	0	0	0	0	0	0	0	0	0	0	0	0	0	0	0	0	0	0	0	0	0	0	0	0	0	0	0	0	0	0	0	0	1	0	0	0	0	0	0	0
TRPM2	0	0	0	0	0	0	0	0	0	0	0	0	0	0	0	0	0	0	0	0	0	0	0	0	0	0	0	0	0	0	0	0	0	0	0	0	0	0	0	0	0	1	0	0	0	0	0	0	0
SLC35A2	0	0	0	0	0	0	0	0	0	0	0	0	0	0	0	0	0	0	0	0	0	0	0	0	0	0	0	0	0	0	0	0	0	0	0	0	0	0	0	0	0	1	0	0	0	0	0	0	0
SSR4	0	0	0	0	0	0	0	0	0	0	0	0	0	0	0	0	0	0	0	0	0	0	0	0	0	0	0	0	0	0	0	0	0	0	0	0	0	0	0	0	0	1	0	0	0	0	0	0	0
TAMM41	0	0	0	0	0	0	0	0	0	0	0	0	0	0	0	0	0	0	0	0	0	0	0	0	0	0	0	0	0	0	0	0	0	0	0	0	0	0	0	0	0	0	1	0	0	0	0	0	0
HERC5	0	0	0	0	0	0	0	0	0	0	0	0	0	0	0	0	0	0	0	0	0	0	0	0	0	0	0	0	0	0	0	0	0	0	0	0	0	0	0	0	0	0	1	0	0	0	0	0	0
RB1CC1	0	0	0	0	0	0	0	0	0	0	0	0	0	0	0	0	0	0	0	0	0	0	0	0	0	0	0	0	0	0	0	0	0	0	0	0	0	0	0	0	0	0	1	0	0	0	0	0	0
ZNF16	0	0	0	0	0	0	0	0	0	0	0	0	0	0	0	0	0	0	0	0	0	0	0	0	0	0	0	0	0	0	0	0	0	0	0	0	0	0	0	0	0	0	1	0	0	0	0	0	0
PRRC2B	0	0	0	0	0	0	0	0	0	0	0	0	0	0	0	0	0	0	0	0	0	0	0	0	0	0	0	0	0	0	0	0	0	0	0	0	0	0	0	0	0	0	1	0	0	0	0	0	0
RUFY2	0	0	0	0	0	0	0	0	0	0	0	0	0	0	0	0	0	0	0	0	0	0	0	0	0	0	0	0	0	0	0	0	0	0	0	0	0	0	0	0	0	0	1	0	0	0	0	0	0
INPP5F	0	0	0	0	0	0	0	0	0	0	0	0	0	0	0	0	0	0	0	0	0	0	0	0	0	0	0	0	0	0	0	0	0	0	0	0	0	0	0	0	0	0	1	0	0	0	0	0	0
KRT6C	0	0	0	0	0	0	0	0	0	0	0	0	0	0	0	0	0	0	0	0	0	0	0	0	0	0	0	0	0	0	0	0	0	0	0	0	0	0	0	0	0	0	1	0	0	0	0	0	0
OR4K15	0	0	0	0	0	0	0	0	0	0	0	0	0	0	0	0	0	0	0	0	0	0	0	0	0	0	0	0	0	0	0	0	0	0	0	0	0	0	0	0	0	0	1	0	0	0	0	0	0
CARMIL3	0	0	0	0	0	0	0	0	0	0	0	0	0	0	0	0	0	0	0	0	0	0	0	0	0	0	0	0	0	0	0	0	0	0	0	0	0	0	0	0	0	0	1	0	0	0	0	0	0
MYO1D	0	0	0	0	0	0	0	0	0	0	0	0	0	0	0	0	0	0	0	0	0	0	0	0	0	0	0	0	0	0	0	0	0	0	0	0	0	0	0	0	0	0	1	0	0	0	0	0	0
TSHZ2	0	0	0	0	0	0	0	0	0	0	0	0	0	0	0	0	0	0	0	0	0	0	0	0	0	0	0	0	0	0	0	0	0	0	0	0	0	0	0	0	0	0	1	0	0	0	0	0	0
TARBP1	0	0	0	0	0	0	0	0	0	0	0	0	0	0	0	0	0	0	0	0	0	0	0	0	0	0	0	0	0	0	0	0	0	0	0	0	0	0	0	0	0	0	0	1	0	0	0	0	0
ZNF445	0	0	0	0	0	0	0	0	0	0	0	0	0	0	0	0	0	0	0	0	0	0	0	0	0	0	0	0	0	0	0	0	0	0	0	0	0	0	0	0	0	0	0	1	0	0	0	0	0
SETD2	0	0	0	0	0	0	0	0	0	0	0	0	0	0	0	0	0	0	0	0	0	0	0	0	0	0	0	0	0	0	0	0	0	0	0	0	0	0	0	0	0	0	0	1	0	0	0	0	0
RAP2B	0	0	0	0	0	0	0	0	0	0	0	0	0	0	0	0	0	0	0	0	0	0	0	0	0	0	0	0	0	0	0	0	0	0	0	0	0	0	0	0	0	0	0	1	0	0	0	0	0
RNF4	0	0	0	0	0	0	0	0	0	0	0	0	0	0	0	0	0	0	0	0	0	0	0	0	0	0	0	0	0	0	0	0	0	0	0	0	0	0	0	0	0	0	0	1	0	0	0	0	0
PRSS48	0	0	0	0	0	0	0	0	0	0	0	0	0	0	0	0	0	0	0	0	0	0	0	0	0	0	0	0	0	0	0	0	0	0	0	0	0	0	0	0	0	0	0	1	0	0	0	0	0
LRRC14B	0	0	0	0	0	0	0	0	0	0	0	0	0	0	0	0	0	0	0	0	0	0	0	0	0	0	0	0	0	0	0	0	0	0	0	0	0	0	0	0	0	0	0	1	0	0	0	0	0
ABCC10	0	0	0	0	0	0	0	0	0	0	0	0	0	0	0	0	0	0	0	0	0	0	0	0	0	0	0	0	0	0	0	0	0	0	0	0	0	0	0	0	0	0	0	1	1	0	0	0	0
CACNA2D1	0	0	0	0	0	0	0	0	0	0	0	0	0	0	0	0	0	0	0	0	0	0	0	0	0	0	0	0	0	0	0	0	0	0	0	0	0	0	0	0	0	0	0	1	0	0	0	0	0
PUM3	0	0	0	0	0	0	0	0	0	0	0	0	0	0	0	0	0	0	0	0	0	0	0	0	0	0	0	0	0	0	0	0	0	0	0	0	0	0	0	0	0	0	0	1	0	0	0	0	0
ZNF169	0	0	0	0	0	0	0	0	0	0	0	0	0	0	0	0	0	0	0	0	0	0	0	0	0	0	0	0	0	0	0	0	0	0	0	0	0	0	0	0	0	0	0	1	0	0	0	0	0
TCF7L2	0	0	0	0	0	0	0	0	0	0	0	0	0	0	0	0	0	0	0	0	0	0	0	0	0	0	0	0	0	0	0	0	0	0	0	0	0	0	0	0	0	0	0	1	0	0	0	0	0
PDE3B	0	0	0	0	0	0	0	0	0	0	0	0	0	0	0	0	0	0	0	0	0	0	0	0	0	0	0	0	0	0	0	0	0	0	0	0	0	0	0	0	0	0	0	1	0	0	0	0	0
B3GAT1	0	0	0	0	0	0	0	0	0	0	0	0	0	0	0	0	0	0	0	0	0	0	0	0	0	0	0	0	0	0	0	0	0	0	0	0	0	0	0	0	0	0	0	1	0	0	0	0	0
LTBR	0	0	0	0	0	0	0	0	0	0	0	0	0	0	0	0	0	0	0	0	0	0	0	0	0	0	0	0	0	0	0	0	0	0	0	0	0	0	0	0	0	0	0	1	0	0	0	0	0
KRT3	0	0	0	0	0	0	0	0	0	0	0	0	0	0	0	0	0	0	0	0	0	0	0	0	0	0	0	0	0	0	0	0	0	0	0	0	0	0	0	0	0	0	0	1	0	0	0	0	0
AREL1	0	0	0	0	0	0	0	0	0	0	0	0	0	0	0	0	0	0	0	0	0	0	0	0	0	0	0	0	0	0	0	0	0	0	0	0	0	0	0	0	0	0	0	1	0	0	0	0	0
DIO2	0	0	0	0	0	0	0	0	0	0	0	0	0	0	0	0	0	0	0	0	0	0	0	0	0	0	0	0	0	0	0	0	0	0	0	0	0	0	0	0	0	0	0	1	0	0	0	0	0
SENP8	0	0	0	0	0	0	0	0	0	0	0	0	0	0	0	0	0	0	0	0	0	0	0	0	0	0	0	0	0	0	0	0	0	0	0	0	0	0	0	0	0	0	0	1	0	0	0	0	0
NFATC3	0	0	0	0	0	0	0	0	0	0	0	0	0	0	0	0	0	0	0	0	0	0	0	0	0	0	0	0	0	0	0	0	0	0	0	0	0	0	0	0	0	0	0	1	0	0	0	0	0
TANGO6	0	0	0	0	0	0	0	0	0	0	0	0	0	0	0	0	0	0	0	0	0	0	0	0	0	0	0	0	0	0	0	0	0	0	0	0	0	0	0	0	0	0	0	1	0	0	0	0	0
NLRP1	0	0	0	0	0	0	0	0	0	0	0	0	0	0	0	0	0	0	0	0	0	0	0	0	0	0	0	0	0	0	0	0	0	0	0	0	0	0	0	0	0	0	0	1	0	0	0	0	0
IMPA2	0	0	0	0	0	0	0	0	0	0	0	0	0	0	0	0	0	0	0	0	0	0	0	0	0	0	0	0	0	0	0	0	0	0	0	0	0	0	0	0	0	0	0	1	0	0	0	0	0
ZNF98	0	0	0	0	0	0	0	0	0	0	0	0	0	0	0	0	0	0	0	0	0	0	0	0	0	0	0	0	0	0	0	0	0	0	0	0	0	0	0	0	0	0	0	1	0	0	0	0	0
UPB1	0	0	0	0	0	0	0	0	0	0	0	0	0	0	0	0	0	0	0	0	0	0	0	0	0	0	0	0	0	0	0	0	0	0	0	0	0	0	0	0	0	0	0	1	0	0	0	0	0
MTOR	0	0	0	0	0	0	0	0	0	0	0	0	0	0	0	0	0	0	0	0	0	0	0	0	0	0	0	0	0	0	0	0	0	0	0	0	0	0	0	0	0	0	0	0	1	0	0	1	0
USP48	0	0	0	0	0	0	0	0	0	0	0	0	0	0	0	0	0	0	0	0	0	0	0	0	0	0	0	0	0	0	0	0	0	0	0	0	0	0	0	0	0	0	0	0	1	0	0	0	0
CA14	0	0	0	0	0	0	0	0	0	0	0	0	0	0	0	0	0	0	0	0	0	0	0	0	0	0	0	0	0	0	0	0	0	0	0	0	0	0	0	0	0	0	0	0	1	0	0	0	0
CADM3	0	0	0	0	0	0	0	0	0	0	0	0	0	0	0	0	0	0	0	0	0	0	0	0	0	0	0	0	0	0	0	0	0	0	0	0	0	0	0	0	0	0	0	0	1	0	0	0	0
ATP1A2	0	0	0	0	0	0	0	0	0	0	0	0	0	0	0	0	0	0	0	0	0	0	0	0	0	0	0	0	0	0	0	0	0	0	0	0	0	0	0	0	0	0	0	0	1	0	0	0	0
KIAA1614	0	0	0	0	0	0	0	0	0	0	0	0	0	0	0	0	0	0	0	0	0	0	0	0	0	0	0	0	0	0	0	0	0	0	0	0	0	0	0	0	0	0	0	0	1	0	0	0	0
AGPS	0	0	0	0	0	0	0	0	0	0	0	0	0	0	0	0	0	0	0	0	0	0	0	0	0	0	0	0	0	0	0	0	0	0	0	0	0	0	0	0	0	0	0	0	1	0	0	0	0
PDCD6IP	0	0	0	0	0	0	0	0	0	0	0	0	0	0	0	0	0	0	0	0	0	0	0	0	0	0	0	0	0	0	0	0	0	0	0	0	0	0	0	0	0	0	0	0	1	0	0	0	0
SUCLG2	0	0	0	0	0	0	0	0	0	0	0	0	0	0	0	0	0	0	0	0	0	0	0	0	0	0	0	0	0	0	0	0	0	0	0	0	0	0	0	0	0	0	0	0	1	0	0	0	0
VPS8	0	0	0	0	0	0	0	0	0	0	0	0	0	0	0	0	0	0	0	0	0	0	0	0	0	0	0	0	0	0	0	0	0	0	0	0	0	0	0	0	0	0	0	0	1	0	0	0	0
OSMR	0	0	0	0	0	0	0	0	0	0	0	0	0	0	0	0	0	0	0	0	0	0	0	0	0	0	0	0	0	0	0	0	0	0	0	0	0	0	0	0	0	0	0	0	1	0	0	0	0
GRM3	0	0	0	0	0	0	0	0	0	0	0	0	0	0	0	0	0	0	0	0	0	0	0	0	0	0	0	0	0	0	0	0	0	0	0	0	0	0	0	0	0	0	0	0	1	0	0	0	0
HEPACAM2	0	0	0	0	0	0	0	0	0	0	0	0	0	0	0	0	0	0	0	0	0	0	0	0	0	0	0	0	0	0	0	0	0	0	0	0	0	0	0	0	0	0	0	0	1	0	0	0	0
AASS	0	0	0	0	0	0	0	0	0	0	0	0	0	0	0	0	0	0	0	0	0	0	0	0	0	0	0	0	0	0	0	0	0	0	0	0	0	0	0	0	0	0	0	0	1	0	0	0	0
PRDM14	0	0	0	0	0	0	0	0	0	0	0	0	0	0	0	0	0	0	0	0	0	0	0	0	0	0	0	0	0	0	0	0	0	0	0	0	0	0	0	0	0	0	0	0	1	0	0	0	0
DAPK1	0	0	0	0	0	0	0	0	0	0	0	0	0	0	0	0	0	0	0	0	0	0	0	0	0	0	0	0	0	0	0	0	0	0	0	0	0	0	0	0	0	0	0	0	1	0	0	0	0
DENND1A	0	0	0	0	0	0	0	0	0	0	0	0	0	0	0	0	0	0	0	0	0	0	0	0	0	0	0	0	0	0	0	0	0	0	0	0	0	0	0	0	0	0	0	0	1	0	0	0	0
TUBAL3	0	0	0	0	0	0	0	0	0	0	0	0	0	0	0	0	0	0	0	0	0	0	0	0	0	0	0	0	0	0	0	0	0	0	0	0	0	0	0	0	0	0	0	0	1	0	0	0	0
UBE2D1	0	0	0	0	0	0	0	0	0	0	0	0	0	0	0	0	0	0	0	0	0	0	0	0	0	0	0	0	0	0	0	0	0	0	0	0	0	0	0	0	0	0	0	0	1	0	0	0	0
CATSPER1	0	0	0	0	0	0	0	0	0	0	0	0	0	0	0	0	0	0	0	0	0	0	0	0	0	0	0	0	0	0	0	0	0	0	0	0	0	0	0	0	0	0	0	0	1	0	0	0	0
PZP	0	0	0	0	0	0	0	0	0	0	0	0	0	0	0	0	0	0	0	0	0	0	0	0	0	0	0	0	0	0	0	0	0	0	0	0	0	0	0	0	0	0	0	0	1	0	0	0	0
UTP20	0	0	0	0	0	0	0	0	0	0	0	0	0	0	0	0	0	0	0	0	0	0	0	0	0	0	0	0	0	0	0	0	0	0	0	0	0	0	0	0	0	0	0	0	1	0	0	0	0
CPNE7	0	0	0	0	0	0	0	0	0	0	0	0	0	0	0	0	0	0	0	0	0	0	0	0	0	0	0	0	0	0	0	0	0	0	0	0	0	0	0	0	0	0	0	0	1	0	0	0	0
RAPGEFL1	0	0	0	0	0	0	0	0	0	0	0	0	0	0	0	0	0	0	0	0	0	0	0	0	0	0	0	0	0	0	0	0	0	0	0	0	0	0	0	0	0	0	0	0	1	0	0	0	0
KIF19	0	0	0	0	0	0	0	0	0	0	0	0	0	0	0	0	0	0	0	0	0	0	0	0	0	0	0	0	0	0	0	0	0	0	0	0	0	0	0	0	0	0	0	0	1	0	0	0	0
ZNF233	0	0	0	0	0	0	0	0	0	0	0	0	0	0	0	0	0	0	0	0	0	0	0	0	0	0	0	0	0	0	0	0	0	0	0	0	0	0	0	0	0	0	0	0	1	0	0	0	0
TRAPPC6A	0	0	0	0	0	0	0	0	0	0	0	0	0	0	0	0	0	0	0	0	0	0	0	0	0	0	0	0	0	0	0	0	0	0	0	0	0	0	0	0	0	0	0	0	1	0	0	0	0
ESF1	0	0	0	0	0	0	0	0	0	0	0	0	0	0	0	0	0	0	0	0	0	0	0	0	0	0	0	0	0	0	0	0	0	0	0	0	0	0	0	0	0	0	0	0	1	0	0	0	0
SLA2	0	0	0	0	0	0	0	0	0	0	0	0	0	0	0	0	0	0	0	0	0	0	0	0	0	0	0	0	0	0	0	0	0	0	0	0	0	0	0	0	0	0	0	0	1	0	0	0	0
CDH22	0	0	0	0	0	0	0	0	0	0	0	0	0	0	0	0	0	0	0	0	0	0	0	0	0	0	0	0	0	0	0	0	0	0	0	0	0	0	0	0	0	0	0	0	1	0	0	0	0
THOC5	0	0	0	0	0	0	0	0	0	0	0	0	0	0	0	0	0	0	0	0	0	0	0	0	0	0	0	0	0	0	0	0	0	0	0	0	0	0	0	0	0	0	0	0	1	0	0	0	0
ZCCHC17	0	0	0	0	0	0	0	0	0	0	0	0	0	0	0	0	0	0	0	0	0	0	0	0	0	0	0	0	0	0	0	0	0	0	0	0	0	0	0	0	0	0	0	0	0	1	0	0	0
PIK3C2B	0	0	0	0	0	0	0	0	0	0	0	0	0	0	0	0	0	0	0	0	0	0	0	0	0	0	0	0	0	0	0	0	0	0	0	0	0	1	0	0	0	0	0	0	0	1	0	0	0
POC1A	0	0	0	0	0	0	0	0	0	0	0	0	0	0	0	0	0	0	0	0	0	0	0	0	0	0	0	0	0	0	0	0	0	0	0	0	0	0	0	0	0	0	0	0	0	1	0	0	0
OSBPL11	0	0	0	0	0	0	0	0	0	0	0	0	0	0	0	0	0	0	0	0	0	0	0	0	0	0	0	0	0	0	0	0	0	0	0	0	0	0	0	0	0	0	0	0	0	1	0	0	0
FGD2	0	0	0	0	0	0	0	0	0	0	0	0	0	0	0	0	0	0	0	0	0	0	0	0	0	0	0	0	0	0	0	0	0	0	0	0	0	0	0	0	0	0	0	0	0	1	0	0	0
KMT5B	0	0	0	0	0	0	0	0	0	0	0	0	0	0	0	0	0	0	0	0	0	0	0	0	0	0	0	0	0	0	0	0	0	0	0	0	0	0	0	0	0	0	0	0	0	1	0	0	0
MMP3	0	0	0	0	0	0	0	0	0	0	0	0	0	0	0	0	0	0	0	0	0	0	0	0	0	0	0	0	0	0	0	0	0	0	0	0	0	0	0	0	0	0	0	0	0	1	0	0	0
SP1	0	0	0	0	0	0	0	0	0	0	0	0	0	0	0	0	0	0	0	0	0	0	0	0	0	0	0	0	0	0	0	0	0	0	0	0	0	0	0	0	0	0	0	0	0	1	0	0	0
PIAS1	0	0	0	0	0	0	0	0	0	0	0	0	0	0	0	0	0	0	0	0	0	0	0	0	0	0	0	0	0	0	0	0	0	0	0	0	0	0	0	0	0	0	0	0	0	1	0	0	0
GLYR1	0	0	0	0	0	0	0	0	0	0	0	0	0	0	0	0	0	0	0	0	0	0	0	0	0	0	0	0	0	0	0	0	0	0	0	0	0	0	0	0	0	0	0	0	0	1	0	0	0
ECSIT	0	0	0	0	0	0	0	0	0	0	0	0	0	0	0	0	0	0	0	0	0	0	0	0	0	0	0	0	0	0	0	0	0	0	0	0	0	0	0	0	0	0	0	0	0	1	0	0	0
CATSPERG	0	0	0	0	0	0	0	0	0	0	0	0	0	0	0	0	0	0	0	0	0	0	0	0	0	0	0	0	0	0	0	0	0	0	0	0	0	0	0	0	0	0	0	0	0	1	0	0	0
BCAR3	0	0	0	0	0	0	0	0	0	0	0	0	0	0	0	0	0	0	0	0	0	0	0	0	0	0	0	0	0	0	0	0	0	0	0	0	0	0	0	0	0	0	0	0	0	0	1	0	0
ADAR	0	0	0	0	0	0	0	0	0	0	0	0	0	0	0	0	0	0	0	0	0	0	0	0	0	0	0	0	0	0	0	0	0	0	0	0	0	0	0	0	0	0	0	0	0	0	1	0	0
ASB3	0	0	0	0	0	0	0	0	0	0	0	0	0	0	0	0	0	0	0	0	0	0	0	0	0	0	0	0	0	0	0	0	0	0	0	0	0	0	0	0	0	0	0	0	0	0	1	0	0
CNNM3	0	0	0	0	0	0	0	0	0	0	0	0	0	0	0	0	0	0	0	0	0	0	0	0	0	0	0	0	0	0	0	0	0	0	0	0	0	0	0	0	0	0	0	0	0	0	1	0	0
SULT1C3	0	0	0	0	0	0	0	0	0	0	0	0	0	0	0	0	0	0	0	0	0	0	0	0	0	0	0	0	0	0	0	0	0	0	0	0	0	0	0	0	0	0	0	0	0	0	1	0	0
ATF2	0	0	0	0	0	0	0	0	0	0	0	0	0	0	0	0	0	0	0	0	0	0	0	0	0	0	0	0	0	0	0	0	0	0	0	0	0	0	0	0	0	0	0	0	0	0	1	0	0
CCDC54	0	0	0	0	0	0	0	0	0	0	0	0	0	0	0	0	0	0	0	0	0	0	0	0	0	0	0	0	0	0	0	0	0	0	0	0	0	0	0	0	0	0	0	0	0	0	1	0	0
POLR2B	0	0	0	0	0	0	0	0	0	0	0	0	0	0	0	0	0	0	0	0	0	0	0	0	0	0	0	0	0	0	0	0	0	0	0	0	0	0	0	0	0	0	0	0	0	0	1	0	0
KLHL2	0	0	0	0	0	0	0	0	0	0	0	0	0	0	0	0	0	0	0	0	0	0	0	0	0	0	0	0	0	0	0	0	0	0	0	0	0	0	0	0	0	0	0	0	0	0	1	0	0
ARFGEF3	0	0	0	0	0	0	0	0	0	0	0	0	0	0	0	0	0	0	0	0	0	0	0	0	0	0	0	0	0	0	0	0	0	0	0	0	0	0	0	0	0	0	0	0	0	0	1	0	0
PON3	0	0	0	0	0	0	0	0	0	0	0	0	0	0	0	0	0	0	0	0	0	0	0	0	0	0	0	0	0	0	0	0	0	0	0	0	0	0	0	0	0	0	0	0	0	0	1	0	0
SLC26A5	0	0	0	0	0	0	0	0	0	0	0	0	0	0	0	0	0	0	0	0	0	0	0	0	0	0	0	0	0	0	0	0	0	0	0	0	0	0	0	0	0	0	0	0	0	0	1	0	0
PPP1R3A	0	0	0	0	0	0	0	0	0	0	0	0	0	0	0	0	0	0	0	0	0	0	0	0	0	0	0	0	0	0	0	0	0	0	0	0	0	0	0	0	0	0	0	0	0	0	1	0	0
OR2AG2	0	0	0	0	0	0	0	0	0	0	0	0	0	0	0	0	0	0	0	0	0	0	0	0	0	0	0	0	0	0	0	0	0	0	0	0	0	0	0	0	0	0	0	0	0	0	1	0	0
CEP164	0	0	0	0	0	0	0	0	0	0	0	0	0	0	0	0	0	0	0	0	0	0	0	0	0	0	0	0	0	0	0	0	0	0	0	0	0	0	0	0	0	0	0	0	0	0	1	0	0
TRAV7	0	0	0	0	0	0	0	0	0	0	0	0	0	0	0	0	0	0	0	0	0	0	0	0	0	0	0	0	0	0	0	0	0	0	0	0	0	0	0	0	0	0	0	0	0	0	1	0	0
PTPN21	0	0	0	0	0	0	0	0	0	0	0	0	0	0	0	0	0	0	0	0	0	0	0	0	0	0	0	0	0	0	0	0	0	0	0	0	0	0	0	0	0	0	0	0	0	0	1	0	0
CHD9	0	0	0	0	0	0	0	0	0	0	0	0	0	0	0	0	0	0	0	0	0	0	0	0	0	0	0	0	0	0	0	0	0	0	0	0	0	0	0	0	0	0	0	0	0	0	1	0	0
SMTNL2	0	0	0	0	0	0	0	0	0	0	0	0	0	0	0	0	0	0	0	0	0	0	0	0	0	0	0	0	0	0	0	0	0	0	0	0	0	0	0	0	0	0	0	0	0	0	1	0	0
IZUMO1	0	0	0	0	0	0	0	0	0	0	0	0	0	0	0	0	0	0	0	0	0	0	0	0	0	0	0	0	0	0	0	0	0	0	0	0	0	0	0	0	0	0	0	0	0	0	1	0	0
CD33	0	0	0	0	0	0	0	0	0	0	0	0	0	0	0	0	0	0	0	0	0	0	0	0	0	0	0	0	0	0	0	0	0	0	0	0	0	0	0	0	0	0	0	0	0	0	1	0	0
NOL4L	0	0	0	0	0	0	0	0	0	0	0	0	0	0	0	0	0	0	0	0	0	0	0	0	0	0	0	0	0	0	0	0	0	0	0	0	0	0	0	0	0	0	0	0	0	0	1	0	0
SON	0	0	0	0	0	0	0	0	0	0	0	0	0	0	0	0	0	0	0	0	0	0	0	0	0	0	0	0	0	0	0	0	0	0	0	0	0	0	0	0	0	0	0	0	0	0	1	0	0
MTMR8	0	0	0	0	0	0	0	0	0	0	0	0	0	0	0	0	0	0	0	0	0	0	0	0	0	0	0	0	0	0	0	0	0	0	0	0	0	0	0	0	0	0	0	0	0	0	1	0	0
COL8A2	0	0	0	0	0	0	0	0	0	0	0	0	0	0	0	0	0	0	0	0	0	0	0	0	0	0	0	0	0	0	0	0	0	0	0	0	0	0	0	0	0	0	0	0	0	0	0	1	0
RGL1	0	0	0	0	0	0	0	0	0	0	0	0	0	0	0	0	0	0	0	0	0	0	0	0	0	0	0	0	0	0	0	0	0	0	0	0	0	0	0	0	0	0	0	0	0	0	0	1	0
PPP1R15B	0	0	0	0	0	0	0	0	0	0	0	0	0	0	0	0	0	0	0	0	0	0	0	0	0	0	0	0	0	0	0	0	0	0	0	0	0	0	0	0	0	0	0	0	0	0	0	1	0
SMYD2	0	0	0	0	0	0	0	0	0	0	0	0	0	0	0	0	0	0	0	0	0	0	0	0	0	0	0	0	0	0	0	0	0	0	0	0	0	0	0	0	0	0	0	0	0	0	0	1	0
COQ8A	0	0	0	0	0	0	0	0	0	0	0	0	0	0	0	0	0	0	0	0	0	0	0	0	0	0	0	0	0	0	0	0	0	0	0	0	0	0	0	0	0	0	0	0	0	0	0	1	0
ASXL2	0	0	0	0	0	0	0	0	0	0	0	0	0	0	0	0	0	0	0	0	0	0	0	0	0	0	0	0	0	0	0	0	0	0	0	0	0	0	0	0	0	0	0	0	0	0	0	1	0
TOGARAM2	0	0	0	0	0	0	0	0	0	0	0	0	0	0	0	0	0	0	0	0	0	0	0	0	0	0	0	0	0	0	0	0	0	0	0	0	0	0	0	0	0	0	0	0	0	0	0	1	0
ANO10	0	0	0	0	0	0	0	0	0	0	0	0	0	0	0	0	0	0	0	0	0	0	0	0	0	0	0	0	0	0	0	0	0	0	0	0	0	0	0	0	0	0	0	0	0	0	0	1	0
FSTL1	0	0	0	0	0	0	0	0	0	0	0	0	0	0	0	0	0	0	0	0	0	0	0	0	0	0	0	0	0	0	0	0	0	0	0	0	0	0	0	0	0	0	0	0	0	0	0	1	0
PLOD2	0	0	0	0	0	0	0	0	0	0	0	0	0	0	0	0	0	0	0	0	0	0	0	0	0	0	0	0	0	0	0	0	0	0	0	0	0	0	0	0	0	0	0	0	0	0	0	1	0
NAALADL2	0	0	0	0	0	0	0	0	0	0	0	0	0	0	0	0	0	0	0	0	0	0	0	0	0	0	0	0	0	0	0	0	0	0	0	0	0	0	0	0	0	0	0	0	0	0	0	1	0
ZBTB49	0	0	0	0	0	0	0	0	0	0	0	0	0	0	0	0	0	0	0	0	0	0	0	0	0	0	0	0	0	0	0	0	0	0	0	0	0	0	0	0	0	0	0	0	0	0	0	1	0
RICTOR	0	0	0	0	0	0	0	0	0	0	0	0	0	0	0	0	0	0	0	0	0	0	0	0	0	0	0	0	0	0	0	0	0	0	0	0	0	0	0	0	0	0	0	0	0	0	0	1	0
SHROOM1	0	0	0	0	0	0	0	0	0	0	0	0	0	0	0	0	0	0	0	0	0	0	0	0	0	0	0	0	0	0	0	0	0	0	0	0	0	0	0	0	0	0	0	0	0	0	0	1	0
SAR1B	0	0	0	0	0	0	0	0	0	0	0	0	0	0	0	0	0	0	0	0	0	0	0	0	0	0	0	0	0	0	0	0	0	0	0	0	0	0	0	0	0	0	0	0	0	0	0	1	0
OR2W1	0	0	0	0	0	0	0	0	0	0	0	0	0	0	0	0	0	0	0	0	0	0	0	0	0	0	0	0	0	0	0	0	0	0	0	0	0	0	0	0	0	0	0	0	0	0	0	1	0
CDKN1A	0	0	0	0	0	0	0	0	0	0	0	0	0	0	0	0	0	0	0	0	0	0	0	0	0	0	0	0	0	0	0	0	0	0	0	0	0	0	0	0	0	0	0	0	0	0	0	1	0
PSD3	0	0	0	0	0	0	0	0	0	0	0	0	0	0	0	0	0	0	0	0	0	0	0	0	0	0	0	0	0	0	0	0	0	0	0	0	0	0	0	0	0	0	0	0	0	0	0	1	0
VCPIP1	0	0	0	0	0	0	0	0	0	0	0	0	0	0	0	0	0	0	0	0	0	0	0	0	0	0	0	0	0	0	0	0	0	0	0	0	0	0	0	0	0	0	0	0	0	0	0	1	0
OSGIN2	0	0	0	0	0	0	0	0	0	0	0	0	0	0	0	0	0	0	0	0	0	0	0	0	0	0	0	0	0	0	0	0	0	0	0	0	0	0	0	0	0	0	0	0	0	0	0	1	0
FBXO43	0	0	0	0	0	0	0	0	0	0	0	0	0	0	0	0	0	0	0	0	0	0	0	0	0	0	0	0	0	0	0	0	0	0	0	0	0	0	0	0	0	0	0	0	0	0	0	1	0
LAMC3	0	0	0	0	0	0	0	0	0	0	0	0	0	0	0	0	0	0	0	0	0	0	0	0	0	0	0	0	0	0	0	0	0	0	0	0	0	0	0	0	0	0	0	0	0	0	0	1	0
OLFM1	0	0	0	0	0	0	0	0	0	0	0	0	0	0	0	0	0	0	0	0	0	0	0	0	0	0	0	0	0	0	0	0	0	0	0	0	0	0	0	0	0	0	0	0	0	0	0	1	0
MLLT10	0	0	0	0	0	0	0	0	0	0	0	0	0	0	0	0	0	0	0	0	0	0	0	0	0	0	0	0	0	0	0	0	0	0	0	0	0	0	0	0	0	0	0	0	0	0	0	1	0
EIF3M	0	0	0	0	0	0	0	0	0	0	0	0	0	0	0	0	0	0	0	0	0	0	0	0	0	0	0	0	0	0	0	0	0	0	0	0	0	0	0	0	0	0	0	0	0	0	0	1	0
IFTAP	0	0	0	0	0	0	0	0	0	0	0	0	0	0	0	0	0	0	0	0	0	0	0	0	0	0	0	0	0	0	0	0	0	0	0	0	0	0	0	0	0	0	0	0	0	0	0	1	0
SLC11A2	0	0	0	0	0	0	0	0	0	0	0	0	0	0	0	0	0	0	0	0	0	0	0	0	0	0	0	0	0	0	0	0	0	0	0	0	0	0	0	0	0	0	0	0	0	0	0	1	0
DCN	0	0	0	0	0	0	0	0	0	0	0	0	0	0	0	0	0	0	0	0	0	0	0	0	0	0	0	0	0	0	0	0	0	0	0	0	0	0	0	0	0	0	0	0	0	0	0	1	0
DNAH10	0	0	0	0	0	0	0	0	0	0	0	0	0	0	0	0	0	0	0	0	0	0	0	0	0	0	0	0	0	0	0	0	0	0	0	0	0	0	0	0	0	0	0	0	0	0	0	1	1
CHFR	0	0	0	0	0	0	0	0	0	0	0	0	0	0	0	0	0	0	0	0	0	0	0	0	0	0	0	0	0	0	0	0	0	0	0	0	0	0	0	0	0	0	0	0	0	0	0	1	0
USPL1	0	0	0	0	0	0	0	0	0	0	0	0	0	0	0	0	0	0	0	0	0	0	0	0	0	0	0	0	0	0	0	0	0	0	0	0	0	0	0	0	0	0	0	0	0	0	0	1	0
RUBCNL	0	0	0	0	0	0	0	0	0	0	0	0	0	0	0	0	0	0	0	0	0	0	0	0	0	0	0	0	0	0	0	0	0	0	0	0	0	0	0	0	0	0	0	0	0	0	0	1	0
AL592490.1	0	0	0	0	0	0	0	0	0	0	0	0	0	0	0	0	0	0	0	0	0	0	0	0	0	0	0	0	0	0	0	0	0	0	0	0	0	0	0	0	0	0	0	0	0	0	0	1	0
BORA	0	0	0	0	0	0	0	0	0	0	0	0	0	0	0	0	0	0	0	0	0	0	0	0	0	0	0	0	0	0	0	0	0	0	0	0	0	0	0	0	0	0	0	0	0	0	0	1	0
RNASE7	0	0	0	0	0	0	0	0	0	0	0	0	0	0	0	0	0	0	0	0	0	0	0	0	0	0	0	0	0	0	0	0	0	0	0	0	0	0	0	0	0	0	0	0	0	0	0	1	0
AKAP6	0	0	0	0	0	0	0	0	0	0	0	0	0	0	0	0	0	0	0	0	0	0	0	0	0	0	0	0	0	0	0	0	0	0	0	0	0	0	0	0	0	0	0	0	0	0	0	1	0
WDR25	0	0	0	0	0	0	0	0	0	0	0	0	0	0	0	0	0	0	0	0	0	0	0	0	0	0	0	0	0	0	0	0	0	0	0	0	0	0	0	0	0	0	0	0	0	0	0	1	0
MYO5C	0	0	0	0	0	0	0	0	0	0	0	0	0	0	0	0	0	0	0	0	0	0	0	0	0	0	0	0	0	0	0	0	0	0	0	0	0	0	0	0	0	0	0	0	0	0	0	1	0
GOLGA6A	0	0	0	0	0	0	0	0	0	0	0	0	0	0	0	0	0	0	0	0	0	0	0	0	0	0	0	0	0	0	0	0	0	0	0	0	0	0	0	0	0	0	0	0	0	0	0	1	0
UBN1	0	0	0	0	0	0	0	0	0	0	0	0	0	0	0	0	0	0	0	0	0	0	0	0	0	0	0	0	0	0	0	0	0	0	0	0	0	0	0	0	0	0	0	0	0	0	0	1	0
VPS35L	0	0	0	0	0	0	0	0	0	0	0	0	0	0	0	0	0	0	0	0	0	0	0	0	0	0	0	0	0	0	0	0	0	0	0	0	0	0	0	0	0	0	0	0	0	0	0	1	0
REXO5	0	0	0	0	0	0	0	0	0	0	0	0	0	0	0	0	0	0	0	0	0	0	0	0	0	0	0	0	0	0	0	0	0	0	0	0	0	0	0	0	0	0	0	0	0	0	0	1	0
SHCBP1	0	0	0	0	0	0	0	0	0	0	0	0	0	0	0	0	0	0	0	0	0	0	0	0	0	0	0	0	0	0	0	0	0	0	0	0	0	0	0	0	0	0	0	0	0	0	0	1	0
SPG7	0	0	0	0	0	0	0	0	0	0	0	0	0	0	0	0	0	0	0	0	0	0	0	0	0	0	0	0	0	0	0	0	0	0	0	0	0	0	0	0	0	0	0	0	0	0	0	1	0
MRC2	0	0	0	0	0	0	0	0	0	0	0	0	0	0	0	0	0	0	0	0	0	0	0	0	0	0	0	0	0	0	0	0	0	0	0	0	0	0	0	0	0	0	0	0	0	0	0	1	0
RECQL5	0	0	0	0	0	0	0	0	0	0	0	0	0	0	0	0	0	0	0	0	0	0	0	0	0	0	0	0	0	0	0	0	0	0	0	0	0	0	0	0	0	0	0	0	0	0	0	1	0
B4GALT6	0	0	0	0	0	0	0	0	0	0	0	0	0	0	0	0	0	0	0	0	0	0	0	0	0	0	0	0	0	0	0	0	0	0	0	0	0	0	0	0	0	0	0	0	0	0	0	1	0
OR7G1	0	0	0	0	0	0	0	0	0	0	0	0	0	0	0	0	0	0	0	0	0	0	0	0	0	0	0	0	0	0	0	0	0	0	0	0	0	0	0	0	0	0	0	0	0	0	0	1	0
PRKD2	0	0	0	0	0	0	0	0	0	0	0	0	0	0	0	0	0	0	0	0	0	0	0	0	0	0	0	0	0	0	0	0	0	0	0	0	0	0	0	0	0	0	0	0	0	0	0	1	0
PTPRH	0	0	0	0	0	0	0	0	0	0	0	0	0	0	0	0	0	0	0	0	0	0	0	0	0	0	0	0	0	0	0	0	0	0	0	0	0	0	0	0	0	0	0	0	0	0	0	1	0
PCK1	0	0	0	0	0	0	0	0	0	0	0	0	0	0	0	0	0	0	0	0	0	0	0	0	0	0	0	0	0	0	0	0	0	0	0	0	0	0	0	0	0	0	0	0	0	0	0	1	0
PIWIL3	0	0	0	0	0	0	0	0	0	0	0	0	0	0	0	0	0	0	0	0	0	0	0	0	0	0	0	0	0	0	0	0	0	0	0	0	0	0	0	0	0	0	0	0	0	0	0	1	0
ADSL	0	0	0	0	0	0	0	0	0	0	0	0	0	0	0	0	0	0	0	0	0	0	0	0	0	0	0	0	0	0	0	0	0	0	0	0	0	0	0	0	0	0	0	0	0	0	0	1	0
AKAP17A	0	0	0	0	0	0	0	0	0	0	0	0	0	0	0	0	0	0	0	0	0	0	0	0	0	0	0	0	0	0	0	0	0	0	0	0	0	0	0	0	0	0	0	0	0	0	0	1	0
ATP1B4	0	0	0	0	0	0	0	0	0	0	0	0	0	0	0	0	0	0	0	0	0	0	0	0	0	0	0	0	0	0	0	0	0	0	0	0	0	0	0	0	0	0	0	0	0	0	0	1	0
IRAK1	0	0	0	0	0	0	0	0	0	0	0	0	0	0	0	0	0	0	0	0	0	0	0	0	0	0	0	0	0	0	0	0	0	0	0	0	0	0	0	0	0	0	0	0	0	0	0	1	0
RPS6KA1	0	0	0	0	0	0	0	0	0	0	0	0	0	0	0	0	0	0	0	0	0	0	0	0	0	0	0	0	0	0	0	0	0	0	0	0	0	0	0	0	0	0	0	0	0	0	0	0	1
YIPF4	0	0	0	0	0	0	0	0	0	0	0	0	0	0	0	0	0	0	0	0	0	0	0	0	0	0	0	0	0	0	0	0	0	0	0	0	0	0	0	0	0	0	0	0	0	0	0	0	1
SLC5A7	0	0	0	0	0	0	0	0	0	0	0	0	0	0	0	0	0	0	0	0	0	0	0	0	0	0	0	0	0	0	0	0	0	0	0	0	0	0	0	0	0	0	0	0	0	0	0	0	1
NDUFS1	0	0	0	0	0	0	0	0	0	0	0	0	0	0	0	0	0	0	0	0	0	0	0	0	0	0	0	0	0	0	0	0	0	0	0	0	0	0	0	0	0	0	0	0	0	0	0	0	1
CD96	0	0	0	0	0	0	0	0	0	0	0	0	0	0	0	0	0	0	0	0	0	0	0	0	0	0	0	0	0	0	0	0	0	0	0	0	0	0	0	0	0	0	0	0	0	0	0	0	1
ACAP2	0	0	0	0	0	0	0	0	0	0	0	0	0	0	0	0	0	0	0	0	0	0	0	0	0	0	0	0	0	0	0	0	0	0	0	0	0	0	0	0	0	0	0	0	0	0	0	0	1
SERINC1	0	0	0	0	0	0	0	0	0	0	0	0	0	0	0	0	0	0	0	0	0	0	0	0	0	0	0	0	0	0	0	0	0	0	0	0	0	0	0	0	0	0	0	0	0	0	0	0	1
LATS1	0	0	0	0	0	0	0	0	0	0	0	0	0	0	0	0	0	0	0	0	0	0	0	0	0	0	0	0	0	0	0	0	0	0	0	0	0	0	0	0	0	0	0	0	0	0	0	0	1
KAT6A	0	0	0	0	0	0	0	0	0	0	0	0	0	0	0	0	0	0	0	0	0	0	0	0	0	0	0	0	0	0	0	0	0	0	0	0	0	0	0	0	0	0	0	0	0	0	0	0	1
PRUNE2	0	0	0	0	0	0	0	0	0	0	0	0	0	0	0	0	0	0	0	0	0	0	0	0	0	0	0	0	0	0	0	0	0	0	0	0	0	0	0	0	0	0	0	0	0	0	0	0	1
MYO3A	0	0	0	0	0	0	0	0	0	0	0	0	0	0	0	0	0	0	0	0	0	0	0	0	0	0	0	0	0	0	0	0	0	0	0	0	0	0	0	0	0	0	0	0	0	0	0	0	1
ADAMTS14	0	0	0	0	0	0	0	0	0	0	0	0	0	0	0	0	0	0	0	0	0	0	0	0	0	0	0	0	0	0	0	0	0	0	0	0	0	0	0	0	0	0	0	0	0	0	0	0	1
ANKRD22	0	0	0	0	0	0	0	0	0	0	0	0	0	0	0	0	0	0	0	0	0	0	0	0	0	0	0	0	0	0	0	0	0	0	0	0	0	0	0	0	0	0	0	0	0	0	0	0	1
MYRF	0	0	0	0	0	0	0	0	0	0	0	0	0	0	0	0	0	0	0	0	0	0	0	0	0	0	0	0	0	0	0	0	0	0	0	0	0	0	0	0	0	0	0	0	0	0	0	0	1
NCAPD2	0	0	0	0	0	0	0	0	0	0	0	0	0	0	0	0	0	0	0	0	0	0	0	0	0	0	0	0	0	0	0	0	0	0	0	0	0	0	0	0	0	0	0	0	0	0	0	0	1
UBC	0	0	0	0	0	0	0	0	0	0	0	0	0	0	0	0	0	0	0	0	0	0	0	0	0	0	0	0	0	0	0	0	0	0	0	0	0	0	0	0	0	0	0	0	0	0	0	0	1
PPP4R3A	0	0	0	0	0	0	0	0	0	0	0	0	0	0	0	0	0	0	0	0	0	0	0	0	0	0	0	0	0	0	0	0	0	0	0	0	0	0	0	0	0	0	0	0	0	0	0	0	1
BLM	0	0	0	0	0	0	0	0	0	0	0	0	0	0	0	0	0	0	0	0	0	0	0	0	0	0	0	0	0	0	0	0	0	0	0	0	0	0	0	0	0	0	0	0	0	0	0	0	1
MRM1	0	0	0	0	0	0	0	0	0	0	0	0	0	0	0	0	0	0	0	0	0	0	0	0	0	0	0	0	0	0	0	0	0	0	0	0	0	0	0	0	0	0	0	0	0	0	0	0	1
GRN	0	0	0	0	0	0	0	0	0	0	0	0	0	0	0	0	0	0	0	0	0	0	0	0	0	0	0	0	0	0	0	0	0	0	0	0	0	0	0	0	0	0	0	0	0	0	0	0	1
SMURF2	0	0	0	0	0	0	0	0	0	0	0	0	0	0	0	0	0	0	0	0	0	0	0	0	0	0	0	0	0	0	0	0	0	0	0	0	0	0	0	0	0	0	0	0	0	0	0	0	1
L3MBTL4	0	0	0	0	0	0	0	0	0	0	0	0	0	0	0	0	0	0	0	0	0	0	0	0	0	0	0	0	0	0	0	0	0	0	0	0	0	0	0	0	0	0	0	0	0	0	0	0	1
STXBP2	0	0	0	0	0	0	0	0	0	0	0	0	0	0	0	0	0	0	0	0	0	0	0	0	0	0	0	0	0	0	0	0	0	0	0	0	0	0	0	0	0	0	0	0	0	0	0	0	1
NEXMIF	0	0	0	0	0	0	0	0	0	0	0	0	0	0	0	0	0	0	0	0	0	0	0	0	0	0	0	0	0	0	0	0	0	0	0	0	0	0	0	0	0	0	0	0	0	0	0	0	1
EXTL1	0	0	0	0	0	0	0	0	0	0	0	0	0	0	0	0	0	0	0	0	0	0	0	0	0	0	0	0	0	0	0	0	0	0	0	0	0	0	0	0	0	0	0	0	0	0	0	0	0
FOXJ3	0	0	0	0	0	0	0	0	0	0	0	0	0	0	0	0	0	0	0	0	0	0	0	0	0	0	0	0	0	0	0	0	0	0	0	0	0	0	0	0	0	0	0	0	0	0	0	0	0
CACNA1E	0	0	0	0	0	0	0	0	0	0	0	0	0	0	0	0	0	0	0	0	0	0	0	0	0	0	0	0	0	0	0	0	0	0	0	0	0	0	0	0	0	0	0	0	0	0	0	0	0
ELF3	0	0	0	0	0	0	0	0	0	0	0	0	0	0	0	0	0	0	0	0	0	0	0	0	0	0	0	0	0	0	0	0	0	0	0	0	0	0	0	0	0	0	0	0	0	0	0	0	0
VWA3B	0	0	0	0	0	0	0	0	0	0	0	0	0	0	0	0	0	0	0	0	0	0	0	0	0	0	0	0	0	0	0	0	0	0	0	0	0	0	0	0	0	0	0	0	0	0	0	0	0
ACOX2	0	0	0	0	0	0	0	0	0	0	0	0	0	0	0	0	0	0	0	0	0	0	0	0	0	0	0	0	0	0	0	0	0	0	0	0	0	0	0	0	0	0	0	0	0	0	0	0	0
FTMT	0	0	0	0	0	0	0	0	0	0	0	0	0	0	0	0	0	0	0	0	0	0	0	0	0	0	0	0	0	0	0	0	0	0	0	0	0	0	0	0	0	0	0	0	0	0	0	0	0
SRA1	0	0	0	0	0	0	0	0	0	0	0	0	0	0	0	0	0	0	0	0	0	0	0	0	0	0	0	0	0	0	0	0	0	0	0	0	0	0	0	0	0	0	0	0	0	0	0	0	0
PCDHA6	0	0	0	0	0	0	0	0	0	0	0	0	0	0	0	0	0	0	0	0	0	0	0	0	0	0	0	0	0	0	0	0	0	0	0	0	0	0	0	0	0	0	0	0	0	0	0	0	0
PCDHB9	0	0	0	0	0	0	0	0	0	0	0	0	0	0	0	0	0	0	0	0	0	0	0	0	0	0	0	0	0	0	0	0	0	0	0	0	0	0	0	0	0	0	0	0	0	0	0	0	0
MEP1A	0	0	0	0	0	0	0	0	0	0	0	0	0	0	0	0	0	0	0	0	0	0	0	0	0	0	0	0	0	0	0	0	0	0	0	0	0	0	0	0	0	0	0	0	0	0	0	0	0
CASP8AP2	0	0	0	0	0	0	0	0	0	0	0	0	0	0	0	0	0	0	0	0	0	0	0	0	0	0	0	0	0	0	0	0	0	0	0	0	0	0	0	0	0	0	0	0	0	0	0	0	0
MET	0	0	0	0	0	0	0	0	0	0	0	0	0	0	0	0	0	0	0	0	0	0	0	0	0	0	0	0	0	0	0	0	0	0	0	0	0	0	0	0	0	0	0	0	0	0	0	0	0
GALNT11	0	0	0	0	0	0	0	0	0	0	0	0	0	0	0	0	0	0	0	0	0	0	0	0	0	0	0	0	0	0	0	0	0	0	0	0	0	0	0	0	0	0	0	0	0	0	0	0	0
MSR1	0	0	0	0	0	0	0	0	0	0	0	0	0	0	0	0	0	0	0	0	0	0	0	0	0	0	0	0	0	0	0	0	0	0	0	0	0	0	0	0	0	0	0	0	0	0	0	0	0
PHYHIP	0	0	0	0	0	0	0	0	0	0	0	0	0	0	0	0	0	0	0	0	0	0	0	0	0	0	0	0	0	0	0	0	0	0	0	0	0	0	0	0	0	0	0	0	0	0	0	0	0
SGK3	0	0	0	0	0	0	0	0	0	0	0	0	0	0	0	0	0	0	0	0	0	0	0	0	0	0	0	0	0	0	0	0	0	0	0	0	0	0	0	0	0	0	0	0	0	0	0	0	0
PRKACG	0	0	0	0	0	0	0	0	0	0	0	0	0	0	0	0	0	0	0	0	0	0	0	0	0	0	0	0	0	0	0	0	0	0	0	0	0	0	0	0	0	0	0	0	0	0	0	0	0
AGTPBP1	0	0	0	0	0	0	0	0	0	0	0	0	0	0	0	0	0	0	0	0	0	0	0	0	0	0	0	0	0	0	0	0	0	0	0	0	0	0	0	0	0	0	0	0	0	0	0	0	0
CRAT	0	0	0	0	0	0	0	0	0	0	0	0	0	0	0	0	0	0	0	0	0	0	0	0	0	0	0	0	0	0	0	0	0	0	0	0	0	0	0	0	0	0	0	0	0	0	0	0	0
ANKRD30A	0	0	0	0	0	0	0	0	0	0	0	0	0	0	0	0	0	0	0	0	0	0	0	0	0	0	0	0	0	0	0	0	0	0	0	0	0	0	0	0	0	0	0	0	0	0	0	0	0
RBP3	0	0	0	0	0	0	0	0	0	0	0	0	0	0	0	0	0	0	0	0	0	0	0	0	0	0	0	0	0	0	0	0	0	0	0	0	0	0	0	0	0	0	0	0	0	0	0	0	0
RGR	0	0	0	0	0	0	0	0	0	0	0	0	0	0	0	0	0	0	0	0	0	0	0	0	0	0	0	0	0	0	0	0	0	0	0	0	0	0	0	0	0	0	0	0	0	0	0	0	0
POLL	0	0	0	0	0	0	0	0	0	0	0	0	0	0	0	0	0	0	0	0	0	0	0	0	0	0	0	0	0	0	0	0	0	0	0	0	0	0	0	0	0	0	0	0	0	0	0	0	0
SORCS3	0	0	0	0	0	0	0	0	0	0	0	0	0	0	0	0	0	0	0	0	0	0	0	0	0	0	0	0	0	0	0	0	0	0	0	0	0	0	0	0	0	0	0	0	0	0	0	0	0
CPT1A	0	0	0	0	0	0	0	0	0	0	0	0	0	0	0	0	0	0	0	0	0	0	0	0	0	0	0	0	0	0	0	0	0	0	0	0	0	0	0	0	0	0	0	0	0	0	0	0	0
NARS2	0	0	0	0	0	0	0	0	0	0	0	0	0	0	0	0	0	0	0	0	0	0	0	0	0	0	0	0	0	0	0	0	0	0	0	0	0	0	0	0	0	0	0	0	0	0	0	0	0
BEST3	0	0	0	0	0	0	0	0	0	0	0	0	0	0	0	0	0	0	0	0	0	0	0	0	0	0	0	0	0	0	0	0	0	0	0	0	0	0	0	0	0	0	0	0	0	0	0	0	0
CFAP251	0	0	0	0	0	0	0	0	0	0	0	0	0	0	0	0	0	0	0	0	0	0	0	0	0	0	0	0	0	0	0	0	0	0	0	0	0	0	0	0	0	0	0	0	0	0	0	0	0
SAV1	0	0	0	0	0	0	0	0	0	0	0	0	0	0	0	0	0	0	0	0	0	0	0	0	0	0	0	0	0	0	0	0	0	0	0	0	0	0	0	0	0	0	0	0	0	0	0	0	0
ATG2B	0	0	0	0	0	0	0	0	0	0	0	0	0	0	0	0	0	0	0	0	0	0	0	0	0	0	0	0	0	0	0	0	0	0	0	0	0	0	0	0	0	0	0	0	0	0	0	0	0
MESP1	0	0	0	0	0	0	0	0	0	0	0	0	0	0	0	0	0	0	0	0	0	0	0	0	0	0	0	0	0	0	0	0	0	0	0	0	0	0	0	0	0	0	0	0	0	0	0	0	0
TOB1	0	0	0	0	0	0	0	0	0	0	0	0	0	0	0	0	0	0	0	0	0	0	0	0	0	0	0	0	0	0	0	0	0	0	0	0	0	0	0	0	0	0	0	0	0	0	0	0	0
MGAT5B	0	0	0	0	0	0	0	0	0	0	0	0	0	0	0	0	0	0	0	0	0	0	0	0	0	0	0	0	0	0	0	0	0	0	0	0	0	0	0	0	0	0	0	0	0	0	0	0	0
TSHZ1	0	0	0	0	0	0	0	0	0	0	0	0	0	0	0	0	0	0	0	0	0	0	0	0	0	0	0	0	0	0	0	0	0	0	0	0	0	0	0	0	0	0	0	0	0	0	0	0	0
UPF1	0	0	0	0	0	0	0	0	0	0	0	0	0	0	0	0	0	0	0	0	0	0	0	0	0	0	0	0	0	0	0	0	0	0	0	0	0	0	0	0	0	0	0	0	0	0	0	0	0
SIPA1L3	0	0	0	0	0	0	0	0	0	0	0	0	0	0	0	0	0	0	0	0	0	0	0	0	0	0	0	0	0	0	0	0	0	0	0	0	0	0	0	0	0	0	0	0	0	0	0	0	0
SGK2	0	0	0	0	0	0	0	0	0	0	0	0	0	0	0	0	0	0	0	0	0	0	0	0	0	0	0	0	0	0	0	0	0	0	0	0	0	0	0	0	0	0	0	0	0	0	0	0	0
PLTP	0	0	0	0	0	0	0	0	0	0	0	0	0	0	0	0	0	0	0	0	0	0	0	0	0	0	0	0	0	0	0	0	0	0	0	0	0	0	0	0	0	0	0	0	0	0	0	0	0
PREX1	0	0	0	0	0	0	0	0	0	0	0	0	0	0	0	0	0	0	0	0	0	0	0	0	0	0	0	0	0	0	0	0	0	0	0	0	0	0	0	0	0	0	0	0	0	0	0	0	0
KCNJ15	0	0	0	0	0	0	0	0	0	0	0	0	0	0	0	0	0	0	0	0	0	0	0	0	0	0	0	0	0	0	0	0	0	0	0	0	0	0	0	0	0	0	0	0	0	0	0	0	0
GAL3ST1	0	0	0	0	0	0	0	0	0	0	0	0	0	0	0	0	0	0	0	0	0	0	0	0	0	0	0	0	0	0	0	0	0	0	0	0	0	0	0	0	0	0	0	0	0	0	0	0	0
HAUS7	0	0	0	0	0	0	0	0	0	0	0	0	0	0	0	0	0	0	0	0	0	0	0	0	0	0	0	0	0	0	0	0	0	0	0	0	0	0	0	0	0	0	0	0	0	0	0	0	0
RASGRP3	0	0	0	0	0	0	0	0	0	0	0	0	0	0	0	0	0	0	0	0	0	0	0	0	0	0	0	0	0	0	0	0	0	0	0	0	0	0	0	0	0	0	0	0	0	0	0	0	0
TGOLN2	0	0	0	0	0	0	0	0	0	0	0	0	0	0	0	0	0	0	0	0	0	0	0	0	0	0	0	0	0	0	0	0	0	0	0	0	0	0	0	0	0	0	0	0	0	0	0	0	0
IHO1	0	0	0	0	0	0	0	0	0	0	0	0	0	0	0	0	0	0	0	0	0	0	0	0	0	0	0	0	0	0	0	0	0	0	0	0	0	0	0	0	0	0	0	0	0	0	0	0	0
PARP14	0	0	0	0	0	0	0	0	0	0	0	0	0	0	0	0	0	0	0	0	0	0	0	0	0	0	0	0	0	0	0	0	0	0	0	0	0	0	0	0	0	0	0	0	0	0	0	0	0
XRN1	0	0	0	0	0	0	0	0	0	0	0	0	0	0	0	0	0	0	0	0	0	0	0	0	0	0	0	0	0	0	0	0	0	0	0	0	0	0	0	0	0	0	0	0	0	0	0	0	0
FAM172A	0	0	0	0	0	0	0	0	0	0	0	0	0	0	0	0	0	0	0	0	0	0	0	0	0	0	0	0	0	0	0	0	0	0	0	0	0	0	0	0	0	0	0	0	0	0	0	0	0
BVES	0	0	0	0	0	0	0	0	0	0	0	0	0	0	0	0	0	0	0	0	0	0	0	0	0	0	0	0	0	0	0	0	0	0	0	0	0	0	0	0	0	0	0	0	0	0	0	0	0
ALDH1B1	0	0	0	0	0	0	0	0	0	0	0	0	0	0	0	0	0	0	0	0	0	0	0	0	0	0	0	0	0	0	0	0	0	0	0	0	0	0	0	0	0	0	0	0	0	0	0	0	0
ALDOB	0	0	0	0	0	0	0	0	0	0	0	0	0	0	0	0	0	0	0	0	0	0	0	0	0	0	0	0	0	0	0	0	0	0	0	0	0	0	0	0	0	0	0	0	0	0	0	0	0
RPL7A	0	0	0	0	0	0	0	0	0	0	0	0	0	0	0	0	0	0	0	0	0	0	0	0	0	0	0	0	0	0	0	0	0	0	0	0	0	0	0	0	0	0	0	0	0	0	0	0	0
CD3D	0	0	0	0	0	0	0	0	0	0	0	0	0	0	0	0	0	0	0	0	0	0	0	0	0	0	0	0	0	0	0	0	0	0	0	0	0	0	0	0	0	0	0	0	0	0	0	0	0
GPR182	0	0	0	0	0	0	0	0	0	0	0	0	0	0	0	0	0	0	0	0	0	0	0	0	0	0	0	0	0	0	0	0	0	0	0	0	0	0	0	0	0	0	0	0	0	0	0	0	0
GNPTAB	0	0	0	0	0	0	0	0	0	0	0	0	0	0	0	0	0	0	0	0	0	0	0	0	0	0	0	0	0	0	0	0	0	0	0	0	0	0	0	0	0	0	0	0	0	0	0	0	0
BAZ1A	0	0	0	0	0	0	0	0	0	0	0	0	0	0	0	0	0	0	0	0	0	0	0	0	0	0	0	0	0	0	0	0	0	0	0	0	0	0	0	0	0	0	0	0	0	0	0	0	0
TDRD9	0	0	0	0	0	0	0	0	0	0	0	0	0	0	0	0	0	0	0	0	0	0	0	0	0	0	0	0	0	0	0	0	0	0	0	0	0	0	0	0	0	0	0	0	0	0	0	0	0
PLIN3	0	0	0	0	0	0	0	0	0	0	0	0	0	0	0	0	0	0	0	0	0	0	0	0	0	0	0	0	0	0	0	0	0	0	0	0	0	0	0	0	0	0	0	0	0	0	0	0	0
MAU2	0	0	0	0	0	0	0	0	0	0	0	0	0	0	0	0	0	0	0	0	0	0	0	0	0	0	0	0	0	0	0	0	0	0	0	0	0	0	0	0	0	0	0	0	0	0	0	0	0
SARS2	0	0	0	0	0	0	0	0	0	0	0	0	0	0	0	0	0	0	0	0	0	0	0	0	0	0	0	0	0	0	0	0	0	0	0	0	0	0	0	0	0	0	0	0	0	0	0	0	0
OR11H1	0	0	0	0	0	0	0	0	0	0	0	0	0	0	0	0	0	0	0	0	0	0	0	0	0	0	0	0	0	0	0	0	0	0	0	0	0	0	0	0	0	0	0	0	0	0	0	0	0
HMGN2	0	0	0	0	0	0	0	0	0	0	0	0	0	0	0	0	0	0	0	0	0	0	0	0	0	0	0	0	0	0	0	0	0	0	0	0	0	0	0	0	0	0	0	0	0	0	0	0	0
MATN1	0	0	0	0	0	0	0	0	0	0	0	0	0	0	0	0	0	0	0	0	0	0	0	0	0	0	0	0	0	0	0	0	0	0	0	0	0	0	0	0	0	0	0	0	0	0	0	0	0
PHC2	0	0	0	0	0	0	0	0	0	0	0	0	0	0	0	0	0	0	0	0	0	0	0	0	0	0	0	0	0	0	0	0	0	0	0	0	0	0	0	0	0	0	0	0	0	0	0	0	0
KIAA0319L	0	0	0	0	0	0	0	0	0	0	0	0	0	0	0	0	0	0	0	0	0	0	0	0	0	0	0	0	0	0	0	0	0	0	0	0	0	0	0	0	0	0	0	0	0	0	0	0	0
IGSF3	0	0	0	0	0	0	0	0	0	0	0	0	0	0	0	0	0	0	0	0	0	0	0	0	0	0	0	0	0	0	0	0	0	0	0	0	0	0	0	0	0	0	0	0	0	0	0	0	0
ITGA10	0	0	0	0	0	0	0	0	0	0	0	0	0	0	0	0	0	0	0	0	0	0	0	0	0	0	0	0	0	0	0	0	0	0	0	0	0	0	0	0	0	0	0	0	0	0	0	0	0
APOB	0	0	0	0	0	0	0	0	0	0	0	0	0	0	0	0	0	0	0	0	0	0	0	0	0	0	0	0	0	0	0	0	0	0	0	0	0	0	0	0	0	0	0	0	0	0	0	0	0
SLC4A1AP	0	0	0	0	0	0	0	0	0	0	0	0	0	0	0	0	0	0	0	0	0	0	0	0	0	0	0	0	0	0	0	0	0	0	0	0	0	0	0	0	0	0	0	0	0	0	0	0	0
TBCCD1	0	0	0	0	0	0	0	0	0	0	0	0	0	0	0	0	0	0	0	0	0	0	0	0	0	0	0	0	0	0	0	0	0	0	0	0	0	0	0	0	0	0	0	0	0	0	0	0	0
FAM13A	0	0	0	0	0	0	0	0	0	0	0	0	0	0	0	0	0	0	0	0	0	0	0	0	0	0	0	0	0	0	0	0	0	0	0	0	0	0	0	0	0	0	0	0	0	0	0	0	0
MTTP	0	0	0	0	0	0	0	0	0	0	0	0	0	0	0	0	0	0	0	0	0	0	0	0	0	0	0	0	0	0	0	0	0	0	0	0	0	0	0	0	0	0	0	0	0	0	0	0	0
HTR1A	0	0	0	0	0	0	0	0	0	0	0	0	0	0	0	0	0	0	0	0	0	0	0	0	0	0	0	0	0	0	0	0	0	0	0	0	0	0	0	0	0	0	0	0	0	0	0	0	0
TENM2	0	0	0	0	0	0	0	0	0	0	0	0	0	0	0	0	0	0	0	0	0	0	0	0	0	0	0	0	0	0	0	0	0	0	0	0	0	0	0	0	0	0	0	0	0	0	0	0	0
LTA	0	0	0	0	0	0	0	0	0	0	0	0	0	0	0	0	0	0	0	0	0	0	0	0	0	0	0	0	0	0	0	0	0	0	0	0	0	0	0	0	0	0	0	0	0	0	0	0	0
KCNK17	0	0	0	0	0	0	0	0	0	0	0	0	0	0	0	0	0	0	0	0	0	0	0	0	0	0	0	0	0	0	0	0	0	0	0	0	0	0	0	0	0	0	0	0	0	0	0	0	0
CUL9	0	0	0	0	0	0	0	0	0	0	0	0	0	0	0	0	0	0	0	0	0	0	0	0	0	0	0	0	0	0	0	0	0	0	0	0	0	0	0	0	0	0	0	0	0	0	0	0	0
AFDN	0	0	0	0	0	0	0	0	0	0	0	0	0	0	0	0	0	0	0	0	0	0	0	0	0	0	0	0	0	0	0	0	0	0	0	0	0	0	0	0	0	0	0	0	0	0	0	0	0
EPPK1	0	0	0	0	0	0	0	0	0	0	0	0	0	0	0	0	0	0	0	0	0	0	0	0	0	0	0	0	0	0	0	0	0	0	0	0	0	0	0	0	0	0	0	0	0	0	0	0	0
OR1L1	0	0	0	0	0	0	0	0	0	0	0	0	0	0	0	0	0	0	0	0	0	0	0	0	0	0	0	0	0	0	0	0	0	0	0	0	0	0	0	0	0	0	0	0	0	0	0	0	0
TYR	0	0	0	0	0	0	0	0	0	0	0	0	0	0	0	0	0	0	0	0	0	0	0	0	0	0	0	0	0	0	0	0	0	0	0	0	0	0	0	0	0	0	0	0	0	0	0	0	0
C12orf40	0	0	0	0	0	0	0	0	0	0	0	0	0	0	0	0	0	0	0	0	0	0	0	0	0	0	0	0	0	0	0	0	0	0	0	0	0	0	0	0	0	0	0	0	0	0	0	0	0
CNTN1	0	0	0	0	0	0	0	0	0	0	0	0	0	0	0	0	0	0	0	0	0	0	0	0	0	0	0	0	0	0	0	0	0	0	0	0	0	0	0	0	0	0	0	0	0	0	0	0	0
TRPC4	0	0	0	0	0	0	0	0	0	0	0	0	0	0	0	0	0	0	0	0	0	0	0	0	0	0	0	0	0	0	0	0	0	0	0	0	0	0	0	0	0	0	0	0	0	0	0	0	0
ABHD2	0	0	0	0	0	0	0	0	0	0	0	0	0	0	0	0	0	0	0	0	0	0	0	0	0	0	0	0	0	0	0	0	0	0	0	0	0	0	0	0	0	0	0	0	0	0	0	0	0
CACNA1H	0	0	0	0	0	0	0	0	0	0	0	0	0	0	0	0	0	0	0	0	0	0	0	0	0	0	0	0	0	0	0	0	0	0	0	0	0	0	0	0	0	0	0	0	0	0	0	0	0
KRTAP1-3	0	0	0	0	0	0	0	0	0	0	0	0	0	0	0	0	0	0	0	0	0	0	0	0	0	0	0	0	0	0	0	0	0	0	0	0	0	0	0	0	0	0	0	0	0	0	0	0	0
LIPE	0	0	0	0	0	0	0	0	0	0	0	0	0	0	0	0	0	0	0	0	0	0	0	0	0	0	0	0	0	0	0	0	0	0	0	0	0	0	0	0	0	0	0	0	0	0	0	0	0
NAPB	0	0	0	0	0	0	0	0	0	0	0	0	0	0	0	0	0	0	0	0	0	0	0	0	0	0	0	0	0	0	0	0	0	0	0	0	0	0	0	0	0	0	0	0	0	0	0	0	0
KLHL34	0	0	0	0	0	0	0	0	0	0	0	0	0	0	0	0	0	0	0	0	0	0	0	0	0	0	0	0	0	0	0	0	0	0	0	0	0	0	0	0	0	0	0	0	0	0	0	0	0
CYSLTR1	0	0	0	0	0	0	0	0	0	0	0	0	0	0	0	0	0	0	0	0	0	0	0	0	0	0	0	0	0	0	0	0	0	0	0	0	0	0	0	0	0	0	0	0	0	0	0	0	0
TKTL1	0	0	0	0	0	0	0	0	0	0	0	0	0	0	0	0	0	0	0	0	0	0	0	0	0	0	0	0	0	0	0	0	0	0	0	0	0	0	0	0	0	0	0	0	0	0	0	0	0
HOOK1	0	0	0	0	0	0	0	0	0	0	0	0	0	0	0	0	0	0	0	0	0	0	0	0	0	0	0	0	0	0	0	0	0	0	0	0	0	0	0	0	0	0	0	0	0	0	0	0	0
UBE2Q1	0	0	0	0	0	0	0	0	0	0	0	0	0	0	0	0	0	0	0	0	0	0	0	0	0	0	0	0	0	0	0	0	0	0	0	0	0	0	0	0	0	0	0	0	0	0	0	0	0
ARHGEF11	0	0	0	0	0	0	0	0	0	0	0	0	0	0	0	0	0	0	0	0	0	0	0	0	0	0	0	0	0	0	0	0	0	0	0	0	0	0	0	0	0	0	0	0	0	0	0	0	0
POU2F1	0	0	0	0	0	0	0	0	0	0	0	0	0	0	0	0	0	0	0	0	0	0	0	0	0	0	0	0	0	0	0	0	0	0	0	0	0	0	0	0	0	0	0	0	0	0	0	0	0
NAV1	0	0	0	0	0	0	0	0	0	0	0	0	0	0	0	0	0	0	0	0	0	0	0	0	0	0	0	0	0	0	0	0	0	0	0	0	0	0	0	0	0	0	0	0	0	0	0	0	0
GCFC2	0	0	0	0	0	0	0	0	0	0	0	0	0	0	0	0	0	0	0	0	0	0	0	0	0	0	0	0	0	0	0	0	0	0	0	0	0	0	0	0	0	0	0	0	0	0	0	0	0
TTC21B	0	0	0	0	0	0	0	0	0	0	0	0	0	0	0	0	0	0	0	0	0	0	0	0	0	0	0	0	0	0	0	0	0	0	0	0	0	0	0	0	0	0	0	0	0	0	0	0	0
SAG	0	0	0	0	0	0	0	0	0	0	0	0	0	0	0	0	0	0	0	0	0	0	0	0	0	0	0	0	0	0	0	0	0	0	0	0	0	0	0	0	0	0	0	0	0	0	0	0	0
OGG1	0	0	0	0	0	0	0	0	0	0	0	0	0	0	0	0	0	0	0	0	0	0	0	0	0	0	0	0	0	0	0	0	0	0	0	0	0	0	0	0	0	0	0	0	0	0	0	0	0
TM4SF18	0	0	0	0	0	0	0	0	0	0	0	0	0	0	0	0	0	0	0	0	0	0	0	0	0	0	0	0	0	0	0	0	0	0	0	0	0	0	0	0	0	0	0	0	0	0	0	0	0
C3orf33	0	0	0	0	0	0	0	0	0	0	0	0	0	0	0	0	0	0	0	0	0	0	0	0	0	0	0	0	0	0	0	0	0	0	0	0	0	0	0	0	0	0	0	0	0	0	0	0	0
CNOT6L	0	0	0	0	0	0	0	0	0	0	0	0	0	0	0	0	0	0	0	0	0	0	0	0	0	0	0	0	0	0	0	0	0	0	0	0	0	0	0	0	0	0	0	0	0	0	0	0	0
RCC1L	0	0	0	0	0	0	0	0	0	0	0	0	0	0	0	0	0	0	0	0	0	0	0	0	0	0	0	0	0	0	0	0	0	0	0	0	0	0	0	0	0	0	0	0	0	0	0	0	0
SEMA3E	0	0	0	0	0	0	0	0	0	0	0	0	0	0	0	0	0	0	0	0	0	0	0	0	0	0	0	0	0	0	0	0	0	0	0	0	0	0	0	0	0	0	0	0	0	0	0	0	0
PDK4	0	0	0	0	0	0	0	0	0	0	0	0	0	0	0	0	0	0	0	0	0	0	0	0	0	0	0	0	0	0	0	0	0	0	0	0	0	0	0	0	0	0	0	0	0	0	0	0	0
JPH1	0	0	0	0	0	0	0	0	0	0	0	0	0	0	0	0	0	0	0	0	0	0	0	0	0	0	0	0	0	0	0	0	0	0	0	0	0	0	0	0	0	0	0	0	0	0	0	0	0
KLF10	0	0	0	0	0	0	0	0	0	0	0	0	0	0	0	0	0	0	0	0	0	0	0	0	0	0	0	0	0	0	0	0	0	0	0	0	0	0	0	0	0	0	0	0	0	0	0	0	0
TJP2	0	0	0	0	0	0	0	0	0	0	0	0	0	0	0	0	0	0	0	0	0	0	0	0	0	0	0	0	0	0	0	0	0	0	0	0	0	0	0	0	0	0	0	0	0	0	0	0	0
PSMB7	0	0	0	0	0	0	0	0	0	0	0	0	0	0	0	0	0	0	0	0	0	0	0	0	0	0	0	0	0	0	0	0	0	0	0	0	0	0	0	0	0	0	0	0	0	0	0	0	0
MS4A14	0	0	0	0	0	0	0	0	0	0	0	0	0	0	0	0	0	0	0	0	0	0	0	0	0	0	0	0	0	0	0	0	0	0	0	0	0	0	0	0	0	0	0	0	0	0	0	0	0
STT3A	0	0	0	0	0	0	0	0	0	0	0	0	0	0	0	0	0	0	0	0	0	0	0	0	0	0	0	0	0	0	0	0	0	0	0	0	0	0	0	0	0	0	0	0	0	0	0	0	0
CD27	0	0	0	0	0	0	0	0	0	0	0	0	0	0	0	0	0	0	0	0	0	0	0	0	0	0	0	0	0	0	0	0	0	0	0	0	0	0	0	0	0	0	0	0	0	0	0	0	0
KRT5	0	0	0	0	0	0	0	0	0	0	0	0	0	0	0	0	0	0	0	0	0	0	0	0	0	0	0	0	0	0	0	0	0	0	0	0	0	0	0	0	0	0	0	0	0	0	0	0	0
ACADS	0	0	0	0	0	0	0	0	0	0	0	0	0	0	0	0	0	0	0	0	0	0	0	0	0	0	0	0	0	0	0	0	0	0	0	0	0	0	0	0	0	0	0	0	0	0	0	0	0
SACS	0	0	0	0	0	0	0	0	0	0	0	0	0	0	0	0	0	0	0	0	0	0	0	0	0	0	0	0	0	0	0	0	0	0	0	0	0	0	0	0	0	0	0	0	0	0	0	0	0
MYCBP2	0	0	0	0	0	0	0	0	0	0	0	0	0	0	0	0	0	0	0	0	0	0	0	0	0	0	0	0	0	0	0	0	0	0	0	0	0	0	0	0	0	0	0	0	0	0	0	0	0
TCF12	0	0	0	0	0	0	0	0	0	0	0	0	0	0	0	0	0	0	0	0	0	0	0	0	0	0	0	0	0	0	0	0	0	0	0	0	0	0	0	0	0	0	0	0	0	0	0	0	0
FEM1B	0	0	0	0	0	0	0	0	0	0	0	0	0	0	0	0	0	0	0	0	0	0	0	0	0	0	0	0	0	0	0	0	0	0	0	0	0	0	0	0	0	0	0	0	0	0	0	0	0
NPEPPS	0	0	0	0	0	0	0	0	0	0	0	0	0	0	0	0	0	0	0	0	0	0	0	0	0	0	0	0	0	0	0	0	0	0	0	0	0	0	0	0	0	0	0	0	0	0	0	0	0
HOXB13	0	0	0	0	0	0	0	0	0	0	0	0	0	0	0	0	0	0	0	0	0	0	0	0	0	0	0	0	0	0	0	0	0	0	0	0	0	0	0	0	0	0	0	0	0	0	0	0	0
CACNG5	0	0	0	0	0	0	0	0	0	0	0	0	0	0	0	0	0	0	0	0	0	0	0	0	0	0	0	0	0	0	0	0	0	0	0	0	0	0	0	0	0	0	0	0	0	0	0	0	0
SLC38A10	0	0	0	0	0	0	0	0	0	0	0	0	0	0	0	0	0	0	0	0	0	0	0	0	0	0	0	0	0	0	0	0	0	0	0	0	0	0	0	0	0	0	0	0	0	0	0	0	0
MYOM1	0	0	0	0	0	0	0	0	0	0	0	0	0	0	0	0	0	0	0	0	0	0	0	0	0	0	0	0	0	0	0	0	0	0	0	0	0	0	0	0	0	0	0	0	0	0	0	0	0
ZNF765	0	0	0	0	0	0	0	0	0	0	0	0	0	0	0	0	0	0	0	0	0	0	0	0	0	0	0	0	0	0	0	0	0	0	0	0	0	0	0	0	0	0	0	0	0	0	0	0	0
ZNF256	0	0	0	0	0	0	0	0	0	0	0	0	0	0	0	0	0	0	0	0	0	0	0	0	0	0	0	0	0	0	0	0	0	0	0	0	0	0	0	0	0	0	0	0	0	0	0	0	0
RIN2	0	0	0	0	0	0	0	0	0	0	0	0	0	0	0	0	0	0	0	0	0	0	0	0	0	0	0	0	0	0	0	0	0	0	0	0	0	0	0	0	0	0	0	0	0	0	0	0	0
ACE2	0	0	0	0	0	0	0	0	0	0	0	0	0	0	0	0	0	0	0	0	0	0	0	0	0	0	0	0	0	0	0	0	0	0	0	0	0	0	0	0	0	0	0	0	0	0	0	0	0
DDX3X	0	0	0	0	0	0	0	0	0	0	0	0	0	0	0	0	0	0	0	0	0	0	0	0	0	0	0	0	0	0	0	0	0	0	0	0	0	0	0	0	0	0	0	0	0	0	0	0	0
COL4A5	0	0	0	0	0	0	0	0	0	0	0	0	0	0	0	0	0	0	0	0	0	0	0	0	0	0	0	0	0	0	0	0	0	0	0	0	0	0	0	0	0	0	0	0	0	0	0	0	0
STAG2	0	0	0	0	0	0	0	0	0	0	0	0	0	0	0	0	0	0	0	0	0	0	0	0	0	0	0	0	0	0	0	0	0	0	0	0	0	0	0	0	0	0	0	0	0	0	0	0	0
SPANXD	0	0	0	0	0	0	0	0	0	0	0	0	0	0	0	0	0	0	0	0	0	0	0	0	0	0	0	0	0	0	0	0	0	0	0	0	0	0	0	0	0	0	0	0	0	0	0	0	0
CSAG1	0	0	0	0	0	0	0	0	0	0	0	0	0	0	0	0	0	0	0	0	0	0	0	0	0	0	0	0	0	0	0	0	0	0	0	0	0	0	0	0	0	0	0	0	0	0	0	0	0
POGZ	0	0	0	0	0	0	0	0	0	0	0	0	0	0	0	0	0	0	0	0	0	0	0	0	0	0	0	0	0	0	0	0	0	0	0	0	0	0	0	0	0	0	0	0	0	0	0	0	0
NT5C1B	0	0	0	0	0	0	0	0	0	0	0	0	0	0	0	0	0	0	0	0	0	0	0	0	0	0	0	0	0	0	0	0	0	0	0	0	0	0	0	0	0	0	0	0	0	0	0	0	0
ZBTB38	0	0	0	0	0	0	0	0	0	0	0	0	0	0	0	0	0	0	0	0	0	0	0	0	0	0	0	0	0	0	0	0	0	0	0	0	0	0	0	0	0	0	0	0	0	0	0	0	0
LRRC15	0	0	0	0	0	0	0	0	0	0	0	0	0	0	0	0	0	0	0	0	0	0	0	0	0	0	0	0	0	0	0	0	0	0	0	0	0	0	0	0	0	0	0	0	0	0	0	0	0
HPSE	0	0	0	0	0	0	0	0	0	0	0	0	0	0	0	0	0	0	0	0	0	0	0	0	0	0	0	0	0	0	0	0	0	0	0	0	0	0	0	0	0	0	0	0	0	0	0	0	0
PCDHA2	0	0	0	0	0	0	0	0	0	0	0	0	0	0	0	0	0	0	0	0	0	0	0	0	0	0	0	0	0	0	0	0	0	0	0	0	0	0	0	0	0	0	0	0	0	0	0	0	0
HSD17B8	0	0	0	0	0	0	0	0	0	0	0	0	0	0	0	0	0	0	0	0	0	0	0	0	0	0	0	0	0	0	0	0	0	0	0	0	0	0	0	0	0	0	0	0	0	0	0	0	0
COL19A1	0	0	0	0	0	0	0	0	0	0	0	0	0	0	0	0	0	0	0	0	0	0	0	0	0	0	0	0	0	0	0	0	0	0	0	0	0	0	0	0	0	0	0	0	0	0	0	0	0
UBE3C	0	0	0	0	0	0	0	0	0	0	0	0	0	0	0	0	0	0	0	0	0	0	0	0	0	0	0	0	0	0	0	0	0	0	0	0	0	0	0	0	0	0	0	0	0	0	0	0	0
PPP3CC	0	0	0	0	0	0	0	0	0	0	0	0	0	0	0	0	0	0	0	0	0	0	0	0	0	0	0	0	0	0	0	0	0	0	0	0	0	0	0	0	0	0	0	0	0	0	0	0	0
MTDH	0	0	0	0	0	0	0	0	0	0	0	0	0	0	0	0	0	0	0	0	0	0	0	0	0	0	0	0	0	0	0	0	0	0	0	0	0	0	0	0	0	0	0	0	0	0	0	0	0
CSTF2T	0	0	0	0	0	0	0	0	0	0	0	0	0	0	0	0	0	0	0	0	0	0	0	0	0	0	0	0	0	0	0	0	0	0	0	0	0	0	0	0	0	0	0	0	0	0	0	0	0
SF3B2	0	0	0	0	0	0	0	0	0	0	0	0	0	0	0	0	0	0	0	0	0	0	0	0	0	0	0	0	0	0	0	0	0	0	0	0	0	0	0	0	0	0	0	0	0	0	0	0	0
PRKAG1	0	0	0	0	0	0	0	0	0	0	0	0	0	0	0	0	0	0	0	0	0	0	0	0	0	0	0	0	0	0	0	0	0	0	0	0	0	0	0	0	0	0	0	0	0	0	0	0	0
SOAT2	0	0	0	0	0	0	0	0	0	0	0	0	0	0	0	0	0	0	0	0	0	0	0	0	0	0	0	0	0	0	0	0	0	0	0	0	0	0	0	0	0	0	0	0	0	0	0	0	0
TEX26	0	0	0	0	0	0	0	0	0	0	0	0	0	0	0	0	0	0	0	0	0	0	0	0	0	0	0	0	0	0	0	0	0	0	0	0	0	0	0	0	0	0	0	0	0	0	0	0	0
UGGT2	0	0	0	0	0	0	0	0	0	0	0	0	0	0	0	0	0	0	0	0	0	0	0	0	0	0	0	0	0	0	0	0	0	0	0	0	0	0	0	0	0	0	0	0	0	0	0	0	0
TAF1C	0	0	0	0	0	0	0	0	0	0	0	0	0	0	0	0	0	0	0	0	0	0	0	0	0	0	0	0	0	0	0	0	0	0	0	0	0	0	0	0	0	0	0	0	0	0	0	0	0
ACSF2	0	0	0	0	0	0	0	0	0	0	0	0	0	0	0	0	0	0	0	0	0	0	0	0	0	0	0	0	0	0	0	0	0	0	0	0	0	0	0	0	0	0	0	0	0	0	0	0	0
MKS1	0	0	0	0	0	0	0	0	0	0	0	0	0	0	0	0	0	0	0	0	0	0	0	0	0	0	0	0	0	0	0	0	0	0	0	0	0	0	0	0	0	0	0	0	0	0	0	0	0
ACOT8	0	0	0	0	0	0	0	0	0	0	0	0	0	0	0	0	0	0	0	0	0	0	0	0	0	0	0	0	0	0	0	0	0	0	0	0	0	0	0	0	0	0	0	0	0	0	0	0	0
MMEL1	0	0	0	0	0	0	0	0	0	0	0	0	0	0	0	0	0	0	0	0	0	0	0	0	0	0	0	0	0	0	0	0	0	0	0	0	0	0	0	0	0	0	0	0	0	0	0	0	0
UBXN11	0	0	0	0	0	0	0	0	0	0	0	0	0	0	0	0	0	0	0	0	0	0	0	0	0	0	0	0	0	0	0	0	0	0	0	0	0	0	0	0	0	0	0	0	0	0	0	0	0
LEPR	0	0	0	0	0	0	0	0	0	0	0	0	0	0	0	0	0	0	0	0	0	0	0	0	0	0	0	0	0	0	0	0	0	0	0	0	0	0	0	0	0	0	0	0	0	0	0	0	0
RPRD2	0	0	0	0	0	0	0	0	0	0	0	0	0	0	0	0	0	0	0	0	0	0	0	0	0	0	0	0	0	0	0	0	0	0	0	0	0	0	0	0	0	0	0	0	0	0	0	0	0
SLAMF7	0	0	0	0	0	0	0	0	0	0	0	0	0	0	0	0	0	0	0	0	0	0	0	0	0	0	0	0	0	0	0	0	0	0	0	0	0	0	0	0	0	0	0	0	0	0	0	0	0
MPZL1	0	0	0	0	0	0	0	0	0	0	0	0	0	0	0	0	0	0	0	0	0	0	0	0	0	0	0	0	0	0	0	0	0	0	0	0	0	0	0	0	0	0	0	0	0	0	0	0	0
ALLC	0	0	0	0	0	0	0	0	0	0	0	0	0	0	0	0	0	0	0	0	0	0	0	0	0	0	0	0	0	0	0	0	0	0	0	0	0	0	0	0	0	0	0	0	0	0	0	0	0
EIF2AK2	0	0	0	0	0	0	0	0	0	0	0	0	0	0	0	0	0	0	0	0	0	0	0	0	0	0	0	0	0	0	0	0	0	0	0	0	0	0	0	0	0	0	0	0	0	0	0	0	0
PPP4R3B	0	0	0	0	0	0	0	0	0	0	0	0	0	0	0	0	0	0	0	0	0	0	0	0	0	0	0	0	0	0	0	0	0	0	0	0	0	0	0	0	0	0	0	0	0	0	0	0	0
GLI2	0	0	0	0	0	0	0	0	0	0	0	0	0	0	0	0	0	0	0	0	0	0	0	0	0	0	0	0	0	0	0	0	0	0	0	0	0	0	0	0	0	0	0	0	0	0	0	0	0
SMARCAL1	0	0	0	0	0	0	0	0	0	0	0	0	0	0	0	0	0	0	0	0	0	0	0	0	0	0	0	0	0	0	0	0	0	0	0	0	0	0	0	0	0	0	0	0	0	0	0	0	0
SLC35A5	0	0	0	0	0	0	0	0	0	0	0	0	0	0	0	0	0	0	0	0	0	0	0	0	0	0	0	0	0	0	0	0	0	0	0	0	0	0	0	0	0	0	0	0	0	0	0	0	0
ZXDC	0	0	0	0	0	0	0	0	0	0	0	0	0	0	0	0	0	0	0	0	0	0	0	0	0	0	0	0	0	0	0	0	0	0	0	0	0	0	0	0	0	0	0	0	0	0	0	0	0
EPHB1	0	0	0	0	0	0	0	0	0	0	0	0	0	0	0	0	0	0	0	0	0	0	0	0	0	0	0	0	0	0	0	0	0	0	0	0	0	0	0	0	0	0	0	0	0	0	0	0	0
EXOC1	0	0	0	0	0	0	0	0	0	0	0	0	0	0	0	0	0	0	0	0	0	0	0	0	0	0	0	0	0	0	0	0	0	0	0	0	0	0	0	0	0	0	0	0	0	0	0	0	0
XRCC4	0	0	0	0	0	0	0	0	0	0	0	0	0	0	0	0	0	0	0	0	0	0	0	0	0	0	0	0	0	0	0	0	0	0	0	0	0	0	0	0	0	0	0	0	0	0	0	0	0
AC008676.3	0	0	0	0	0	0	0	0	0	0	0	0	0	0	0	0	0	0	0	0	0	0	0	0	0	0	0	0	0	0	0	0	0	0	0	0	0	0	0	0	0	0	0	0	0	0	0	0	0
CANX	0	0	0	0	0	0	0	0	0	0	0	0	0	0	0	0	0	0	0	0	0	0	0	0	0	0	0	0	0	0	0	0	0	0	0	0	0	0	0	0	0	0	0	0	0	0	0	0	0
B3GAT2	0	0	0	0	0	0	0	0	0	0	0	0	0	0	0	0	0	0	0	0	0	0	0	0	0	0	0	0	0	0	0	0	0	0	0	0	0	0	0	0	0	0	0	0	0	0	0	0	0
DNAAF5	0	0	0	0	0	0	0	0	0	0	0	0	0	0	0	0	0	0	0	0	0	0	0	0	0	0	0	0	0	0	0	0	0	0	0	0	0	0	0	0	0	0	0	0	0	0	0	0	0
MYL7	0	0	0	0	0	0	0	0	0	0	0	0	0	0	0	0	0	0	0	0	0	0	0	0	0	0	0	0	0	0	0	0	0	0	0	0	0	0	0	0	0	0	0	0	0	0	0	0	0
PCLO	0	0	0	0	0	0	0	0	0	0	0	0	0	0	0	0	0	0	0	0	0	0	0	0	0	0	0	0	0	0	0	0	0	0	0	0	0	0	0	0	0	0	0	0	0	0	0	0	0
DNAJC2	0	0	0	0	0	0	0	0	0	0	0	0	0	0	0	0	0	0	0	0	0	0	0	0	0	0	0	0	0	0	0	0	0	0	0	0	0	0	0	0	0	0	0	0	0	0	0	0	0
PLXNA4	0	0	0	0	0	0	0	0	0	0	0	0	0	0	0	0	0	0	0	0	0	0	0	0	0	0	0	0	0	0	0	0	0	0	0	0	0	0	0	0	0	0	0	0	0	0	0	0	0
CNTNAP2	0	0	0	0	0	0	0	0	0	0	0	0	0	0	0	0	0	0	0	0	0	0	0	0	0	0	0	0	0	0	0	0	0	0	0	0	0	0	0	0	0	0	0	0	0	0	0	0	0
[truncated: 7,450 more rows]
[truncated: 330 more columns]

## Sheet: TableS5
Table S5 The TIDE results
Patient	No benefits	Responder	TIDE	IFNG	MSI Expr Sig	Merck18	CD274	CD8	CTL.flag	Dysfunction	Exclusion	MDSC	CAF	TAM M2
1_101	TRUE	FALSE	2.41	-304.88	0	-20.04	-4.18	0.8	FALSE	0.11	2.41	0.06	0.29	0
1_206	TRUE	FALSE	1.91	-151.71	0	-81.51	-3.93	-9.18	FALSE	0	1.91	0.03	0.24	0.01
2_79	TRUE	FALSE	1.59	-365.28	0	-13.55	-4.52	3.61	FALSE	0.23	1.59	0.05	0.19	0.01
2_129	FALSE	FALSE	1.56	207.7	0	71.89	-0.4	-8.91	FALSE	0.03	1.56	0	0.22	0.01
2_12	TRUE	FALSE	1.54	-259.12	0	-16.97	-3.81	-13.1	FALSE	0.17	1.54	0.04	0.16	0.03
2_184	TRUE	FALSE	1.47	-50.84	0	7.08	-2.49	-16.02	FALSE	0.15	1.47	0.04	0.16	0.02
2_7	TRUE	FALSE	1.29	-98.67	0	49.64	-2.63	-12.82	FALSE	0.36	1.29	0	0.21	-0.02
2_258	TRUE	FALSE	1.19	-181.3	1	-15.49	-1.76	-4.97	FALSE	-0.07	1.19	0.07	0.13	-0.02
1_149	TRUE	FALSE	1.18	-596.05	1	-147.16	-5.68	-20.59	FALSE	0.04	1.18	0.05	0.11	0.02
2_3	TRUE	FALSE	1.16	-298.09	0	2.7	-1.37	-13.05	FALSE	0.11	1.16	0.04	0.12	0.02
2_343	TRUE	FALSE	1.16	-430.12	1	-128.36	1.23	-21.06	FALSE	-0.15	1.16	0.05	0.1	0.02
2_108	FALSE	FALSE	1.11	262.84	0	119.67	-0.5	-12.29	FALSE	0.22	1.11	0	0.16	0
1_306	TRUE	FALSE	1.02	-311.31	0	-40.95	-4.34	-10.01	FALSE	-0.01	1.02	0.04	0.09	0.02
1_359	FALSE	FALSE	0.96	-188.92	0.01	-54.72	3.77	-16.04	FALSE	-0.24	0.96	0.03	0.11	0.01
2_202	FALSE	FALSE	0.95	-442.77	0	-73.52	-4.75	-13.7	FALSE	0.08	0.95	0.05	0.08	0.02
2_125	FALSE	FALSE	0.95	15.61	1	46.88	-4.26	-11.61	FALSE	0.04	0.95	0.04	0.09	0.01
2_266	FALSE	FALSE	0.94	-292.4	0	-32.62	-4.21	-8.87	FALSE	0.12	0.94	0.01	0.11	0.02
2_51	FALSE	FALSE	0.91	-468.14	1	-119.95	-4.02	-19.99	FALSE	-0.13	0.91	0.05	0.05	0.03
2_17	FALSE	FALSE	0.9	383.25	0	36.46	6.54	-8.75	FALSE	0.28	0.9	0	0.16	-0.02
2_285	FALSE	FALSE	0.89	-64.87	1	-4.1	-1.02	-13.17	FALSE	-0.03	0.89	0.04	0.09	0
2_368	FALSE	FALSE	0.88	-530.62	1	-141.07	-4.23	-21.21	FALSE	-0.16	0.88	0.06	0.06	0.01
1_345	FALSE	FALSE	0.88	-148.42	1	-95.48	0.3	13.48	FALSE	0	0.88	0.05	0.08	0
2_279	FALSE	FALSE	0.85	-282.83	0.01	-19.94	-4.69	-12.68	FALSE	-0.06	0.85	0.04	0.11	-0.02
2_86	FALSE	FALSE	0.83	-69.05	1	-45.64	-1.66	-17.77	FALSE	0.02	0.83	0.03	0.09	0
2_138	FALSE	FALSE	0.82	295.34	1	-76.94	-4.54	-13.62	FALSE	0.02	0.82	0.01	0.08	0.03
2_217	FALSE	FALSE	0.82	-253.45	0	-51.87	-3.32	-19.58	FALSE	0.08	0.82	0.05	0.07	0.01
1_349	FALSE	FALSE	0.8	143.2	0	-36.21	-2.14	-16.22	FALSE	0.05	0.8	0.02	0.1	0
2_321	FALSE	FALSE	0.76	-600.58	1	-151.66	-3.11	-20.97	FALSE	-0.18	0.76	0.07	0.02	0.02
1_96	FALSE	FALSE	0.76	-36.1	0	22.04	-3.27	-7.46	FALSE	0.3	0.76	0.01	0.1	0.01
2_302	FALSE	FALSE	0.73	-116	0	-83.22	-4.17	-8.16	FALSE	0.24	0.73	-0.01	0.09	0.03
2_326	FALSE	FALSE	0.71	-68.55	0.09	27.15	-1.33	-10.31	FALSE	-0.13	0.71	0.03	0.07	0.02
2_213	FALSE	FALSE	0.71	-404.07	0	-43.55	-2.38	-16.83	FALSE	0.04	0.71	0.03	0.06	0.02
2_92	FALSE	FALSE	0.7	-309.89	1	-110.8	-0.55	-19.74	FALSE	-0.55	0.7	0.03	0.07	0.01
2_325	FALSE	FALSE	0.67	-500.5	1	-92.12	-4.12	-22.19	FALSE	-0.11	0.67	0.05	0.05	0.01
1_215	FALSE	FALSE	0.64	109.75	0	-18.75	-5.29	-18.14	FALSE	0.03	0.64	0	0.1	0
1_188	FALSE	FALSE	0.64	398.4	0	-10.81	-0.91	-6.47	FALSE	0.19	0.64	-0.03	0.14	-0.02
2_247	FALSE	FALSE	0.64	-73.58	1	-26.38	-1.42	-9.32	FALSE	-0.04	0.64	0.07	0.01	0.02
2_16	FALSE	FALSE	0.63	-13.21	0	-9.77	-4.29	-14.85	FALSE	0.13	0.63	0.02	0.07	0.01
2_41	FALSE	FALSE	0.63	-538.25	1	-141.01	-5.81	-17.63	FALSE	-0.21	0.63	0.06	0.02	0.01
2_32	FALSE	FALSE	0.63	-143.51	0	-22.34	-0.82	-5.62	FALSE	0.25	0.63	0.02	0.09	0
2_5	FALSE	FALSE	0.63	69.06	1	-75.88	-1.72	1.38	FALSE	-0.22	0.63	0.02	0.07	0
2_123	FALSE	FALSE	0.62	-194.99	1	-37.59	-4.14	-17.16	FALSE	-0.04	0.62	0.03	0.04	0.02
1_230	FALSE	FALSE	0.61	-311.12	1	-61.53	5.9	-20.04	FALSE	-0.23	0.61	0.05	0.07	-0.03
2_135	FALSE	FALSE	0.61	-228.68	1	-84.37	-3.41	-18.66	FALSE	-0.06	0.61	0.05	0.06	-0.02
1_291	FALSE	FALSE	0.6	10.81	0	-56.42	-1.66	-10.49	FALSE	-0.11	0.6	0	0.11	-0.03
2_277	FALSE	FALSE	0.59	177.85	0	153.17	-3.21	-12.06	FALSE	0.26	0.59	0.04	0.05	0
2_144	FALSE	FALSE	0.57	651.25	1	58.91	-2.78	-15.53	FALSE	-0.07	0.57	0.03	0.07	-0.01
2_11	FALSE	FALSE	0.57	-58.08	1	-14.89	-0.47	-7.43	FALSE	-0.05	0.57	0	0.04	0.04
2_155	FALSE	FALSE	0.57	-124.03	0.93	66.57	-1.95	-17.89	FALSE	0.01	0.57	0.02	0.05	0.02
2_342	FALSE	FALSE	0.56	-306.75	1	-9.62	-1.21	-12.26	FALSE	-0.16	0.56	0.06	0.03	0
1_333	FALSE	FALSE	0.56	-333.53	1	-134.8	-5.5	-13.19	FALSE	-0.11	0.56	0.03	0.03	0.02
2_8	FALSE	FALSE	0.56	21.3	0	70.33	0.94	-10.29	FALSE	-0.16	0.56	0.01	0.11	-0.02
2_70	FALSE	FALSE	0.56	-315.64	0	28.13	-4.42	-17.84	FALSE	0.26	0.56	0.03	0.04	0.01
2_71	FALSE	FALSE	0.55	-565.43	1	-117.97	-1.14	-21.48	FALSE	-0.15	0.55	0.07	0.01	0
1_142	FALSE	FALSE	0.55	-257.17	0	-85.24	1.45	-13.5	FALSE	-0.01	0.55	0.02	0.08	-0.02
1_272	FALSE	FALSE	0.55	-607.56	0.78	-160.41	-6.17	-19.27	FALSE	-0.04	0.55	0.03	0.07	-0.01
2_4	FALSE	FALSE	0.54	-146.38	0	36.94	-2.37	-14.75	FALSE	0.3	0.54	-0.01	0.07	0.02
1_175	FALSE	FALSE	0.53	117.73	0.99	-25.69	-2.65	3.94	FALSE	-0.03	0.53	0.01	0.09	-0.01
1_299	FALSE	FALSE	0.52	12.93	1	-27.88	-1.51	-13.13	FALSE	-0.08	0.52	0.02	0.04	0.01
1_146	FALSE	FALSE	0.52	5.32	0	-76.08	-5.04	-9.91	FALSE	0.07	0.52	0.01	0.08	-0.01
2_335	FALSE	FALSE	0.52	24.72	1	-17.94	0.25	-10.52	FALSE	0.04	0.52	-0.01	0.08	0.01
2_205	FALSE	FALSE	0.52	-96.67	0	69.47	-0.19	-11.68	FALSE	0.12	0.52	0.04	0.06	-0.01
1_59	FALSE	FALSE	0.52	-72.6	0.01	-95.96	-5	-17.76	FALSE	-0.04	0.52	0	0.06	0.02
2_47	FALSE	FALSE	0.5	-95.92	1	59.87	-1.31	-14.7	FALSE	-0.07	0.5	0.04	0.04	0
2_167	FALSE	FALSE	0.5	-461.63	0	-79.54	-2.4	-14.7	FALSE	0.08	0.5	0.04	0.03	0.01
2_147	FALSE	FALSE	0.49	-94.88	0	40.88	2.11	-10.67	FALSE	0.13	0.49	-0.02	0.09	0.01
1_1	FALSE	FALSE	0.48	185.43	1	-43.16	-3.55	-14.28	FALSE	0	0.48	0.03	0.04	0
2_99	FALSE	FALSE	0.48	-116.15	1	88.68	0.92	-14.93	FALSE	0.05	0.48	0.04	0.02	0.01
2_240	FALSE	FALSE	0.48	-122.58	1	-61.21	-1.95	-20.58	FALSE	-0.4	0.48	0.02	0.05	0.01
2_224	FALSE	FALSE	0.48	-121.01	1	-40.77	6.99	-13.36	FALSE	-0.15	0.48	0.05	0.02	0.01
2_249	FALSE	FALSE	0.47	-414.35	0	-46.65	-2.82	-19.2	FALSE	-0.02	0.47	0.04	0.03	0.01
2_282	FALSE	FALSE	0.47	-366.5	1	-21.61	-1.21	-14.06	FALSE	-0.13	0.47	0.02	0.03	0.01
2_162	FALSE	FALSE	0.47	989.82	0	393.93	1.8	30.28	TRUE	0.47	-0.03	-0.03	0.05	-0.01
1_39	FALSE	FALSE	0.46	-510.35	0.03	-87.26	-4.69	-8.7	FALSE	0.02	0.46	0.05	0.03	-0.01
2_303	FALSE	FALSE	0.46	-589.38	1	-143.42	-3.36	-5.51	FALSE	0.01	0.46	0.04	0	0.02
1_172	FALSE	FALSE	0.45	891.16	0	268.84	2.29	20.81	FALSE	0.23	0.45	0	0.09	-0.02
2_310	FALSE	FALSE	0.45	-78.26	1	49.94	3.47	-15.54	FALSE	-0.09	0.45	0.03	0.04	0
1_340	FALSE	FALSE	0.45	-18.91	0.07	-82.46	-3.14	-8.48	FALSE	-0.08	0.45	0.03	0.05	-0.02
1_57	FALSE	FALSE	0.43	165.7	0	-62	-4.4	-7.58	FALSE	-0.01	0.43	0.02	0.06	-0.01
1_231	FALSE	FALSE	0.43	-644.07	0	-184.14	-5.89	-19.27	FALSE	-0.28	0.43	0.06	-0.01	0.02
1_287	FALSE	FALSE	0.42	355.36	0	11.12	-2.83	-5.66	FALSE	0.21	0.42	-0.01	0.07	0
2_37	FALSE	FALSE	0.42	110.55	0	63.92	3.21	-1.55	FALSE	0.24	0.42	-0.03	0.09	0
2_110	FALSE	FALSE	0.42	-178.97	0	52.75	-3.22	-11.84	FALSE	0.21	0.42	0.03	0.06	-0.02
2_336	FALSE	FALSE	0.41	-356.6	0	-59.11	-4.56	-17.74	FALSE	0.18	0.41	0.05	0	0
2_191	FALSE	FALSE	0.41	126.99	1	-17.47	0.61	-16.57	FALSE	-0.07	0.41	0.02	0.07	-0.03
2_203	FALSE	FALSE	0.41	-382.04	1	-86.95	-1.08	-17.34	FALSE	-0.26	0.41	0.04	0.03	-0.01
1_308	FALSE	FALSE	0.41	315.21	0.83	6.87	-1.04	-2.5	FALSE	-0.1	0.41	0.02	0.04	0.01
1_233	FALSE	FALSE	0.4	296.78	0	61.34	-1.97	8.44	TRUE	0.4	-0.78	-0.03	-0.1	0.01
2_312	FALSE	FALSE	0.4	-313.01	1	-80.06	-2.8	-4.63	FALSE	-0.14	0.4	0.02	0.08	-0.04
1_274	FALSE	FALSE	0.39	492.19	0	182.13	-0.66	62.97	TRUE	0.39	-1.48	-0.05	-0.16	-0.01
2_15	FALSE	FALSE	0.38	-198.1	0	97.78	-0.52	-15.97	FALSE	0.07	0.38	0.02	0.05	-0.01
1_196	FALSE	FALSE	0.38	1163.56	0	377.13	6.35	149.52	TRUE	0.38	-1.11	-0.04	-0.1	-0.04
1_77	FALSE	FALSE	0.38	309.1	0.01	70.36	0.95	21.67	TRUE	0.38	-1.16	-0.01	-0.12	-0.03
2_294	FALSE	FALSE	0.38	129.66	0.79	109.43	-1.27	-11.09	FALSE	0.23	0.38	0.03	0	0.02
1_114	FALSE	FALSE	0.37	294.14	0	284.18	-1.46	97.57	TRUE	0.37	-1.06	-0.03	-0.1	-0.03
2_145	FALSE	FALSE	0.37	676.04	0	311.01	7.56	48.56	TRUE	0.37	-0.71	-0.01	-0.07	-0.03
1_160	FALSE	FALSE	0.37	1902.82	0	678.33	17.51	206.21	TRUE	0.37	-0.44	-0.04	-0.03	-0.04
1_243	FALSE	FALSE	0.37	-386.64	1	-98.11	-4.61	-11.59	FALSE	-0.09	0.37	0.01	0.05	0
2_338	FALSE	FALSE	0.36	625.18	0	114.57	-2.91	-14.37	FALSE	0.07	0.36	-0.02	0.09	-0.01
1_201	FALSE	FALSE	0.35	131.05	0	-38.07	-2.89	-6.62	FALSE	-0.01	0.35	0.01	0.06	-0.02
2_42	FALSE	FALSE	0.35	-147.29	1	-48.41	-3.62	-17.71	FALSE	-0.07	0.35	0.03	0.05	-0.04
1_170	FALSE	FALSE	0.35	-41.12	1	-113.36	-4.53	-6.75	FALSE	-0.27	0.35	0.04	-0.03	0.03
2_75	FALSE	FALSE	0.34	174.1	0.95	9.62	-1.82	-8.53	FALSE	0.05	0.34	-0.02	0.08	0
1_30	FALSE	FALSE	0.34	48.87	0	52.58	-0.49	62.64	TRUE	0.34	-1.03	-0.04	-0.12	0.01
2_355	FALSE	FALSE	0.33	322.08	1	132.12	3.22	4.5	FALSE	0.05	0.33	0.04	0.05	-0.05
1_263	FALSE	FALSE	0.33	1359.39	0	211.67	3.37	34.33	TRUE	0.33	-0.74	-0.05	-0.05	-0.01
2_228	FALSE	FALSE	0.32	-257.49	1	30.23	-3.58	-14.6	FALSE	-0.01	0.32	0.04	-0.01	0.02
2_316	FALSE	FALSE	0.32	-341.08	1	-93.73	-0.15	-20.22	FALSE	-0.18	0.32	0.04	0.01	0
1_315	FALSE	FALSE	0.32	538.12	0	307.69	-2.11	85.38	TRUE	0.32	-0.65	-0.02	-0.06	-0.01
1_164	FALSE	FALSE	0.31	144.43	0	241.88	-0.76	97.5	TRUE	0.31	-0.81	-0.01	-0.09	-0.02
2_328	FALSE	FALSE	0.31	442.71	0	63.49	-1.08	12.11	FALSE	0.28	0.31	-0.02	0.08	-0.02
2_24	FALSE	FALSE	0.31	183.9	0.13	21.44	-3.42	-11.9	FALSE	-0.12	0.31	0.01	-0.03	0.02
1_131	FALSE	FALSE	0.31	-122.82	0	45.69	-0.42	-8.51	FALSE	0.14	0.31	-0.01	0.08	-0.02
1_35	FALSE	FALSE	0.31	-452.62	0	-125.12	-5.81	-17.48	FALSE	-0.08	0.31	0.03	0.01	0.01
1_229	FALSE	FALSE	0.31	311.7	1	37.91	-2.57	-14.47	FALSE	-0.27	0.31	0.03	0.01	0.01
1_318	FALSE	FALSE	0.3	937.05	0	40.13	0.15	25.4	TRUE	0.3	-0.34	-0.05	-0.01	0.01
2_137	FALSE	FALSE	0.29	-212.15	0.08	-99.27	-1.96	-16.48	FALSE	-0.13	0.29	0	0.03	0.02
2_234	FALSE	FALSE	0.29	665.89	0	31.79	2.91	1.85	FALSE	0.22	0.29	0.01	0.05	-0.01
2_19	FALSE	FALSE	0.29	-227.81	1	-54.83	-0.02	-14.24	FALSE	-0.08	0.29	0	0.02	0.03
1_95	FALSE	FALSE	0.28	60	0	-7.02	-2.72	14.94	FALSE	0.04	0.28	0	0.05	0
1_207	FALSE	FALSE	0.28	54.15	0	83.52	-3.23	61.41	TRUE	0.28	-0.42	-0.03	-0.04	0
2_223	FALSE	FALSE	0.27	-396.35	1	-25.02	-2.29	-21.04	FALSE	-0.09	0.27	0.01	0.01	0.02
2_239	FALSE	FALSE	0.27	-196.37	1	-114.22	-5.54	-20.92	FALSE	0.01	0.27	0.02	0	0.02
2_183	FALSE	FALSE	0.27	-203.84	1	-16.18	0.02	-6.26	FALSE	-0.11	0.27	0.01	0.03	0
2_31	FALSE	FALSE	0.27	853.52	0	292.23	-0.14	130.08	TRUE	0.27	-0.69	-0.02	-0.07	-0.02
1_56	FALSE	FALSE	0.26	154.15	0	92.48	-2.4	23.83	TRUE	0.26	-0.56	0.02	-0.09	-0.01
1_367	FALSE	FALSE	0.26	119.88	1	49.48	1.72	-18.32	FALSE	-0.02	0.26	-0.02	0.08	-0.01
2_350	FALSE	FALSE	0.26	1036.73	0	198.58	5.84	77.02	TRUE	0.26	-0.87	-0.01	-0.09	-0.03
2_298	FALSE	FALSE	0.26	-156.57	0	71.19	2.02	4.09	TRUE	0.26	0.12	0.03	0.01	-0.02
1_82	FALSE	FALSE	0.26	-668.09	1	-213.29	-5.37	-16.52	FALSE	0.01	0.26	0.03	0	0.01
1_346	FALSE	FALSE	0.25	49.88	0	50.43	1.13	41.12	TRUE	0.25	-1.17	-0.04	-0.13	-0.01
1_83	FALSE	FALSE	0.25	2064.77	0	548.6	11.39	127.64	TRUE	0.25	-0.76	-0.05	-0.04	-0.03
1_126	FALSE	FALSE	0.25	998.58	1	258.82	4.51	41.06	TRUE	0.25	-0.91	-0.02	-0.17	-0.01
2_46	FALSE	FALSE	0.24	96.68	1	26.28	2.01	-6.04	FALSE	-0.05	0.24	0.02	0.04	-0.03
2_198	FALSE	FALSE	0.23	-48.79	0	30.33	0.91	-8.46	FALSE	-0.1	0.23	0.03	0	0.01
1_6	FALSE	FALSE	0.23	-537.98	1	-149.39	0.3	-22.03	FALSE	-0.1	0.23	0.04	-0.02	0.01
1_2	FALSE	FALSE	0.23	91.02	0	153.16	0.48	49.58	TRUE	0.23	0.3	0.01	0.06	-0.02
1_264	FALSE	FALSE	0.22	-394.03	0	-67.7	-4.95	-9.7	FALSE	0.21	0.22	-0.03	0.06	0
1_76	FALSE	FALSE	0.22	44.35	0	-18.55	-3.79	0.51	FALSE	0.18	0.22	-0.02	0.07	-0.02
2_320	FALSE	FALSE	0.21	118	0	14.94	-2.75	-2.11	FALSE	0.1	0.21	0	0.05	-0.02
1_73	FALSE	FALSE	0.21	-265.23	1	-70.97	9.15	-19.66	FALSE	-0.29	0.21	0.05	-0.03	0.01
2_44	FALSE	FALSE	0.21	-228.2	1	-67.32	-4.16	-21.21	FALSE	-0.22	0.21	0	-0.01	0.03
2_136	FALSE	FALSE	0.21	1477.95	0	254.24	3.29	63.41	TRUE	0.21	-0.55	-0.05	-0.02	-0.01
1_84	FALSE	FALSE	0.21	-409.79	0.08	-79.08	-2.71	-20.09	FALSE	-0.16	0.21	0.03	0	0.01
2_190	FALSE	FALSE	0.21	73.86	0	93.76	1.08	28.59	TRUE	0.21	0.66	0.02	0.1	-0.02
2_323	FALSE	FALSE	0.21	172.29	0	175.6	-2.52	95.79	TRUE	0.21	0.46	0.01	0.07	-0.01
2_369	FALSE	FALSE	0.21	-240.57	0	42.4	-3.19	0.87	FALSE	0.21	0.21	0.02	0.03	-0.02
2_100	FALSE	FALSE	0.2	68.05	1	-25.22	-2.28	-5.18	FALSE	0.06	0.2	0	0.02	0.01
1_295	FALSE	FALSE	0.2	543.68	1	148.71	6.15	40.08	TRUE	0.2	-0.97	-0.04	-0.06	-0.04
2_278	FALSE	FALSE	0.19	273.89	0	-23.57	-2.39	-17.71	FALSE	0.05	0.19	0	0.01	0.02
2_38	FALSE	FALSE	0.19	5.26	1	-0.59	0.9	-18.04	FALSE	-0.05	0.19	-0.01	0.02	0.02
1_364	FALSE	FALSE	0.19	-93.07	1	-103.45	-3.54	-19.8	FALSE	0	0.19	0.03	0.05	-0.05
2_66	FALSE	FALSE	0.18	-7.66	1	-3.88	-1.54	-20.94	FALSE	-0.07	0.18	0.02	0.01	0
2_341	FALSE	FALSE	0.17	-49.87	0	23.85	1.07	-13.68	FALSE	-0.22	0.17	0	0.03	0
1_219	FALSE	FALSE	0.16	53.4	0	-0.07	-4.47	5.22	TRUE	0.16	0.26	-0.02	0.05	0.01
2_208	FALSE	FALSE	0.16	886.28	0	202.35	8.65	8.46	TRUE	0.16	0.11	-0.02	0.06	-0.02
2_90	FALSE	FALSE	0.16	-552.81	1	-81.96	-1.8	-21.31	FALSE	-0.13	0.16	0.05	-0.03	0.01
1_178	FALSE	FALSE	0.16	-179.87	1	-68	-3.89	-13.14	FALSE	-0.16	0.16	-0.02	0.03	0.01
1_199	FALSE	FALSE	0.15	-251.57	1	-150.34	-3.12	-12.47	FALSE	-0.51	0.15	-0.01	0.04	-0.01
1_62	FALSE	FALSE	0.15	135.2	0	43.2	7.64	42.9	TRUE	0.15	-0.49	-0.04	-0.01	-0.02
2_150	FALSE	FALSE	0.14	-200.18	1	-42.77	0.01	-16.61	FALSE	-0.24	0.14	0.04	-0.04	0.01
1_171	FALSE	FALSE	0.14	-340.73	1	-109.9	49.51	-15.34	FALSE	-0.03	0.14	-0.05	0.06	0.01
1_127	FALSE	FALSE	0.13	-353.59	1	-102.93	-2.45	-6.3	FALSE	0.01	0.13	0.02	0	0
1_209	FALSE	FALSE	0.13	1409.91	0	420.52	1.47	138.72	TRUE	0.13	-0.4	-0.02	-0.02	-0.02
1_104	FALSE	FALSE	0.13	-475.25	1	-81.87	-2.59	-17.92	FALSE	-0.07	0.13	0.01	-0.01	0.02
2_273	FALSE	FALSE	0.12	-173.22	1	-40.46	0.02	-11.14	FALSE	-0.09	0.12	-0.01	0.02	0.01
2_245	FALSE	FALSE	0.11	92.19	1	126.33	-3.26	10.17	TRUE	0.11	-0.37	0.02	-0.11	0.03
2_174	FALSE	FALSE	0.11	187.16	1	28.2	-3.15	-9.52	FALSE	0.14	0.11	0	0.01	0.01
1_65	FALSE	FALSE	0.11	-566.04	1	-179.65	-5.75	-14.68	FALSE	0.16	0.11	0	0	0.01
1_124	FALSE	FALSE	0.1	653.06	0	165.92	-0.13	-1.71	FALSE	0.12	0.1	-0.03	0.04	0.01
2_81	FALSE	FALSE	0.1	-556.9	1	-131.01	-5.5	-20.76	FALSE	-0.13	0.1	0.04	-0.06	0.04
1_337	FALSE	FALSE	0.1	879.69	0	215	-2.84	5.32	TRUE	0.1	-0.37	-0.04	-0.02	0
1_221	FALSE	FALSE	0.1	-84.19	1	31.61	1.15	-12.37	FALSE	-0.06	0.1	0.01	0.01	-0.01
1_107	FALSE	FALSE	0.1	-469.42	0	-118.12	-4.35	-20.44	FALSE	-0.11	0.1	0.02	0.03	-0.03
2_236	FALSE	FALSE	0.1	-228.03	1	-61.07	-1.1	-14.48	FALSE	-0.18	0.1	0.01	-0.02	0.03
2_237	FALSE	FALSE	0.09	175.83	1	41.13	0.29	-13.95	FALSE	-0.11	0.09	-0.02	0.06	-0.02
1_112	FALSE	FALSE	0.09	-20.34	0	80.19	-3.29	32.47	TRUE	0.09	1.08	0.05	0.13	-0.01
2_212	FALSE	FALSE	0.09	43.02	0	47.75	2.23	0.67	TRUE	0.09	-0.41	-0.01	-0.06	0.01
2_211	FALSE	FALSE	0.08	-282.28	1	-52.91	-1.59	-11.57	FALSE	-0.25	0.08	0.01	-0.01	0.02
2_348	FALSE	FALSE	0.08	-305.74	1	-75.32	-0.41	-18.84	FALSE	0.03	0.08	0	0.02	0
1_120	FALSE	FALSE	0.08	-84	0	-23.87	12.22	10.5	TRUE	0.08	0.45	0.02	0.03	0
1_179	FALSE	FALSE	0.08	-532.57	0	-189.55	-5.7	-16.54	FALSE	-0.23	0.08	0.02	-0.05	0.03
1_141	FALSE	FALSE	0.07	1006.58	0	450.26	-1.69	31.84	TRUE	0.07	-0.38	-0.02	-0.04	0
2_297	FALSE	FALSE	0.06	82.22	0	-28.43	0.29	-7.78	FALSE	0.08	0.06	0.02	-0.01	0
1_55	FALSE	FALSE	0.06	145.51	0	96.08	1.78	29.36	TRUE	0.06	-0.31	0	-0.03	-0.02
2_281	FALSE	FALSE	0.06	624.7	0	238.74	-0.41	16.81	TRUE	0.06	-0.18	-0.01	0.02	-0.04
2_97	FALSE	FALSE	0.06	-166.18	1	45.18	1.42	-12.8	FALSE	0.05	0.06	0	0.04	-0.04
1_225	FALSE	FALSE	0.05	31.99	1	72.69	-0.5	18.41	TRUE	0.05	-0.12	0.02	-0.04	0.01
2_34	FALSE	FALSE	0.05	285.23	0	44.17	2.6	-12.43	FALSE	0.11	0.05	-0.04	0.04	0.01
2_10	FALSE	FALSE	0.04	-200.38	0	-61.52	-2.89	-18.4	FALSE	-0.03	0.04	0	0.01	0
1_176	FALSE	FALSE	0.04	201.52	0	25.82	-4.34	15.12	FALSE	0.22	0.04	-0.02	0.02	0.01
1_64	FALSE	FALSE	0.04	548.54	0	113.78	0.56	11.9	TRUE	0.04	0.45	0	0.08	-0.01
2_181	FALSE	FALSE	0.04	65.53	0	37.46	3.06	9.45	FALSE	0.27	0.04	0.01	0.02	-0.02
1_67	FALSE	FALSE	0.04	-255.76	0	-36.13	-4.05	2.69	FALSE	0.29	0.04	0.02	0	-0.01
2_29	FALSE	FALSE	0.04	-285.12	1	-56.65	-4.72	-15.88	FALSE	-0.04	0.04	0.01	-0.01	0
2_280	FALSE	FALSE	0.03	1370.02	0	288.02	14.25	65.2	TRUE	0.03	-0.6	-0.04	-0.01	-0.04
1_300	FALSE	FALSE	0.03	-159.87	1	-149.42	-5.06	-13.79	FALSE	-0.08	0.03	0.01	0.01	-0.02
2_140	FALSE	FALSE	0.03	-233.2	1	-47.04	-3.34	-16.59	FALSE	0.09	0.03	0	-0.03	0.04
1_256	FALSE	FALSE	0.03	655.54	0	126.92	-1.4	29.55	TRUE	0.03	-0.6	-0.03	-0.03	-0.02
2_139	FALSE	FALSE	0.03	1154.37	1	299.48	4.28	98.44	TRUE	0.03	-0.49	-0.03	-0.03	-0.01
2_189	FALSE	FALSE	0.03	119.37	1	64.77	4.49	-1.6	FALSE	-0.1	0.03	0.02	-0.01	-0.01
2_248	FALSE	FALSE	0.02	500.67	0	62.06	1.48	-9.12	FALSE	0.11	0.02	-0.03	0.03	0
1_314	FALSE	FALSE	0.02	-6.15	1	-36.96	-4.5	-13.12	FALSE	0.05	0.02	0.03	-0.03	-0.02
2_360	FALSE	FALSE	0.02	-113.89	1	-51.21	-3.64	-9.59	FALSE	-0.27	0.02	-0.01	0	0.01
2_244	FALSE	FALSE	0.01	169.7	0.29	11.97	-1.1	15.34	FALSE	0.08	0.01	0.01	0.03	-0.03
1_254	FALSE	FALSE	0.01	63.14	1	62.77	-0.03	43.25	TRUE	0.01	-0.06	0.04	-0.02	-0.03
1_324	FALSE	FALSE	0.01	1056.84	0	327.12	0.87	56.7	TRUE	0.01	-0.51	0	-0.07	-0.01
1_269	FALSE	FALSE	0.01	-333.02	0	-123.69	-1.95	-21.23	FALSE	-0.31	0.01	-0.04	0.01	0.03
1_268	FALSE	FALSE	0.01	-185.72	0.01	-74.03	-5.26	-6.85	FALSE	0.23	0.01	0.02	-0.02	0.01
1_195	FALSE	FALSE	0.01	-126.59	1	-14.84	-4.39	25.22	FALSE	-0.12	0.01	0.02	-0.04	0.01
1_286	FALSE	FALSE	0.01	-179.53	0	-75.88	-1.15	-4.42	FALSE	0.02	0.01	0	-0.01	0.01
1_134	FALSE	FALSE	0.01	434.05	0	93.62	252.11	81.49	TRUE	0.01	-0.08	0	0	-0.02
1_327	FALSE	FALSE	0.01	338.39	0	126.62	-1.31	3.68	TRUE	0.01	0.32	0	0.08	-0.03
1_226	FALSE	FALSE	0	-474.19	0	-133.24	-4.91	-16.07	FALSE	0.14	0	0.01	-0.01	0.01
1_88	FALSE	TRUE	0	-535.58	0.33	-139.14	-4.66	-8.65	FALSE	-0.09	0	-0.02	0.03	-0.01
1_311	FALSE	TRUE	-0.02	275.15	1	179.22	-3.93	-11.98	FALSE	0	-0.02	0.03	-0.05	0.01
1_227	FALSE	TRUE	-0.03	-300.33	1	-120.8	-4.83	-16.22	FALSE	-0.06	-0.03	0	-0.02	0.01
2_158	FALSE	TRUE	-0.03	-10.53	1	-0.3	3.21	6.86	FALSE	0.03	-0.03	0	0.04	-0.04
2_246	FALSE	TRUE	-0.04	390.6	0.24	102.06	0.75	16.3	TRUE	-0.04	-0.23	-0.02	-0.02	0.01
2_332	FALSE	TRUE	-0.04	268.95	0	75.64	1.32	-7.6	FALSE	0.08	-0.04	0.01	0.01	-0.02
1_173	FALSE	TRUE	-0.05	466.27	0	114.95	3.5	16.75	TRUE	-0.05	-0.97	-0.05	-0.09	-0.01
2_313	FALSE	TRUE	-0.05	-198.9	1	1.03	0.92	8.02	TRUE	-0.05	-0.22	0	-0.03	0.01
1_261	FALSE	TRUE	-0.05	-486.16	0.99	-151.67	-3.5	-20.01	FALSE	-0.24	-0.05	-0.03	0.02	0
1_130	FALSE	TRUE	-0.05	272.99	0	66.7	-2.77	2.27	FALSE	0.03	-0.05	-0.01	0	0.01
2_220	FALSE	TRUE	-0.06	-96.48	0	-13.95	5	-7.84	FALSE	0.11	-0.06	0	-0.01	0.01
2_358	FALSE	TRUE	-0.06	-279.43	1	-14.4	-2.85	-17.38	FALSE	-0.45	-0.06	0.02	-0.03	0
2_116	FALSE	TRUE	-0.08	-205.24	1	-44.63	-3.11	-16.07	FALSE	-0.21	-0.08	0.03	-0.01	-0.03
2_238	FALSE	TRUE	-0.08	-304.67	1	-78.97	-3.71	-19.87	FALSE	-0.19	-0.08	0	-0.01	0.01
1_366	FALSE	TRUE	-0.08	299.21	0.31	180.06	63.66	78.59	TRUE	-0.08	0.25	0.04	0	-0.01
1_180	FALSE	TRUE	-0.09	375.26	1	39.42	0.75	-6.62	FALSE	-0.11	-0.09	0	-0.05	0.03
2_165	FALSE	TRUE	-0.09	221.05	1	64.11	2.49	6.67	FALSE	-0.17	-0.09	0.02	-0.01	-0.02
1_301	FALSE	TRUE	-0.09	1187.33	1	41.29	-1.49	-15.81	FALSE	-0.16	-0.09	0.01	-0.04	0.02
1_288	FALSE	TRUE	-0.1	-117.37	0.79	-52.26	-3.94	-10.77	FALSE	-0.17	-0.1	-0.02	0.01	0
1_262	FALSE	TRUE	-0.1	285.2	0	-49.18	-1.28	-6.16	FALSE	-0.1	-0.1	-0.03	0.03	-0.02
2_356	FALSE	TRUE	-0.1	133.5	0	15.25	4.77	-11.38	FALSE	0.04	-0.1	-0.01	0	0
2_185	FALSE	TRUE	-0.1	374.36	1	162.79	4.21	37.4	TRUE	-0.1	-0.49	0	-0.07	0
2_161	FALSE	TRUE	-0.1	449.4	0	254.42	-0.28	28.3	FALSE	0.04	-0.1	0.01	-0.05	0.02
2_52	FALSE	TRUE	-0.11	535.53	0	105.69	-0.8	-12.47	FALSE	0.02	-0.11	-0.02	0	0
2_93	FALSE	TRUE	-0.11	-120.13	0.11	-8.08	-1.48	-1.67	FALSE	0.09	-0.11	0.01	-0.02	0
1_309	FALSE	TRUE	-0.11	-147.77	1	59.82	-4.01	-17.77	FALSE	0.14	-0.11	0.01	-0.02	0
2_159	FALSE	TRUE	-0.12	-142.94	1	21.07	-1.05	0.03	FALSE	-0.05	-0.12	0.02	-0.07	0.03
1_63	FALSE	TRUE	-0.12	-74.06	0	-90.67	-5.47	-14.38	FALSE	-0.35	-0.12	0	0	-0.02
2_271	FALSE	TRUE	-0.13	-128.96	1	5.1	-2.86	18.46	FALSE	-0.04	-0.13	0.03	-0.05	0
2_352	FALSE	TRUE	-0.13	-187.37	1	-17.66	-4.23	-11.44	FALSE	-0.01	-0.13	0	-0.04	0.02
1_163	FALSE	TRUE	-0.14	257.96	1	-24.13	-4.61	-9.6	FALSE	-0.02	-0.14	0.01	-0.03	0
1_115	FALSE	TRUE	-0.15	-623.25	1	-219.71	-4.8	-22.67	FALSE	-0.28	-0.15	0.01	-0.06	0.02
1_216	FALSE	TRUE	-0.16	-250.21	0	-105.13	0.37	-16.52	FALSE	0.33	-0.16	-0.03	0	0.01
1_49	FALSE	TRUE	-0.16	-442.86	1	-117.19	-2.07	18.26	TRUE	-0.16	0.06	0.06	-0.06	0.01
2_344	FALSE	TRUE	-0.16	337.79	0	80.11	-2.19	-3.9	FALSE	0.19	-0.16	0.01	-0.02	-0.01
2_143	FALSE	TRUE	-0.16	158.81	1	49.98	10.31	-19.38	FALSE	-0.25	-0.16	0.02	-0.02	-0.02
1_157	FALSE	TRUE	-0.16	-23.14	1	0.84	-2.03	-19.19	FALSE	-0.41	-0.16	0.02	-0.06	0.01
2_27	FALSE	TRUE	-0.17	-216.13	1	-89.08	1.61	-12.04	FALSE	-0.32	-0.17	0.03	-0.05	0
1_222	FALSE	TRUE	-0.17	-150.08	1	-72.83	-3.88	-9.45	FALSE	0.16	-0.17	-0.01	-0.03	0.01
2_26	FALSE	TRUE	-0.17	-406.45	1	-155.81	-2.18	-17.73	FALSE	-0.27	-0.17	-0.03	-0.02	0.02
1_113	FALSE	TRUE	-0.18	-349.8	1	-142.06	-5.95	-16.31	FALSE	0.18	-0.18	0.01	-0.05	0.01
1_119	FALSE	TRUE	-0.18	-133.09	0	-35.57	-4.11	-16.96	FALSE	-0.06	-0.18	-0.03	0	0
1_317	FALSE	TRUE	-0.19	-146.86	1	-98.9	-5.82	-3.53	FALSE	-0.19	-0.19	-0.01	-0.05	0.03
1_192	FALSE	TRUE	-0.2	-487.43	0	-182.53	-1.33	-20.16	FALSE	-0.03	-0.2	-0.03	0	0.01
2_292	FALSE	TRUE	-0.2	-575.69	1	-138.84	-3.16	-21.2	FALSE	-0.16	-0.2	0.02	-0.05	0
1_242	FALSE	TRUE	-0.21	-261.92	1	-54.28	-3.99	-17.12	FALSE	-0.02	-0.21	-0.01	-0.03	0.01
1_169	FALSE	TRUE	-0.21	-437.74	1	-159.97	27.8	-15.47	FALSE	0.06	-0.21	-0.05	0.01	0.01
2_265	FALSE	TRUE	-0.21	-373.36	0	-136.64	-3.4	-19.55	FALSE	-0.14	-0.21	-0.02	0	-0.01
2_72	FALSE	TRUE	-0.23	-352.18	1	-78.55	-3.76	-17.69	FALSE	-0.27	-0.23	0.01	-0.01	-0.03
1_339	FALSE	TRUE	-0.23	-263.8	0	-49.87	-3.63	-13.91	FALSE	0.22	-0.23	-0.03	0	0
1_290	FALSE	TRUE	-0.24	1053.79	0	202.57	-1.76	44.24	FALSE	0.25	-0.24	-0.03	0	-0.01
1_105	FALSE	TRUE	-0.24	124.65	0.99	15.84	-3.6	7.13	FALSE	0.3	-0.24	-0.05	-0.02	0.03
2_22	FALSE	TRUE	-0.24	-31.54	1	-88.54	9.27	22.15	FALSE	-0.42	-0.24	-0.01	-0.02	0
1_9	FALSE	TRUE	-0.25	418.61	0	53.27	0.4	-5.28	FALSE	-0.03	-0.25	-0.04	0.02	-0.02
2_257	FALSE	TRUE	-0.26	143.91	0	-2.4	-3.59	3.93	FALSE	0.21	-0.26	0	-0.03	-0.01
2_33	FALSE	TRUE	-0.27	-161.33	0	111.89	1.08	4.94	FALSE	0.11	-0.27	0	-0.05	0.01
2_251	FALSE	TRUE	-0.28	-6.81	1	-46.28	-1.3	-17.59	FALSE	-0.13	-0.28	-0.01	-0.04	0
2_252	FALSE	TRUE	-0.28	-42.35	1	-25.37	0.93	-10.07	FALSE	-0.03	-0.28	0.01	-0.04	-0.01
1_45	FALSE	TRUE	-0.28	501.13	1	223.71	-1.77	126.57	TRUE	-0.28	-0.6	-0.01	-0.07	-0.01
1_255	FALSE	TRUE	-0.29	-161.22	1	-52.16	-0.83	-9.36	FALSE	-0.22	-0.29	0.02	-0.08	0.02
2_68	FALSE	TRUE	-0.29	-229.79	0	-142.03	1.35	-13.44	FALSE	-0.05	-0.29	-0.02	-0.04	0.01
2_58	FALSE	TRUE	-0.3	-358.41	0	-27.97	0.15	-13.54	FALSE	-0.09	-0.3	0.01	-0.04	-0.01
2_156	FALSE	TRUE	-0.3	-42.7	1	49.91	0.49	20.4	FALSE	-0.22	-0.3	-0.02	-0.03	0.01
2_148	FALSE	TRUE	-0.32	-471.01	1	-116.73	-5.04	-17.37	FALSE	0.03	-0.32	0.02	-0.08	0.01
1_18	FALSE	TRUE	-0.32	-538.45	1	-110.09	-5.3	-9.89	FALSE	0	-0.32	0.01	-0.07	0.01
1_347	FALSE	TRUE	-0.33	-136.51	0.99	-129.31	-5.16	-1.62	FALSE	0.12	-0.33	0	-0.06	0.02
1_87	FALSE	TRUE	-0.33	-376.68	0	-92.35	-5.44	-18.27	FALSE	0.25	-0.33	-0.02	-0.05	0.02
1_370	FALSE	TRUE	-0.34	-152.84	0	-88.18	-5.71	-17.04	FALSE	0.15	-0.34	-0.01	-0.03	-0.01
1_102	FALSE	TRUE	-0.34	291.7	0.99	127.02	-3.05	9.48	FALSE	0.14	-0.34	-0.01	-0.04	0
2_235	FALSE	TRUE	-0.35	-502.94	1	-120.81	-1.48	-22.21	FALSE	-0.13	-0.35	0.02	-0.07	0.01
1_152	FALSE	TRUE	-0.35	-574.36	1	-185.62	-5.93	-19.31	FALSE	0.01	-0.35	0	-0.07	0.02
1_270	FALSE	TRUE	-0.35	-503.54	0	-75.67	-6.06	-3.74	FALSE	0.03	-0.35	-0.01	-0.05	0.01
2_78	FALSE	TRUE	-0.35	511.8	1	96.54	-4.31	-12.02	FALSE	0.14	-0.35	-0.02	-0.03	-0.01
1_132	FALSE	TRUE	-0.36	49.06	1	-66.47	-1.67	-18.44	FALSE	-0.19	-0.36	-0.04	-0.02	0.01
2_304	FALSE	TRUE	-0.36	-317.12	1	-61.19	-1.31	-7.24	FALSE	-0.19	-0.36	-0.02	-0.04	0
1_106	FALSE	TRUE	-0.36	-210.72	0.97	-46.33	-5.32	-7.27	FALSE	0.21	-0.36	0	-0.06	0.01
2_351	FALSE	TRUE	-0.37	-168.74	1	-81.46	-3.63	-19.75	FALSE	-0.07	-0.37	0	-0.08	0.02
2_128	FALSE	TRUE	-0.37	-68.81	1	7.36	1.37	-10.69	FALSE	-0.16	-0.37	-0.01	-0.04	-0.01
2_250	FALSE	TRUE	-0.38	-189.2	1	4.83	-1.68	-1.04	FALSE	-0.18	-0.38	0	-0.03	-0.02
1_322	FALSE	TRUE	-0.39	-603.78	1	-234.23	-5.42	-22.44	FALSE	-0.18	-0.39	-0.01	-0.06	0.01
1_60	FALSE	TRUE	-0.39	1904.45	0	429.51	0.53	31.56	FALSE	0.05	-0.39	-0.03	-0.02	-0.01
1_153	FALSE	TRUE	-0.4	65.66	1	22.35	-3.52	-15.32	FALSE	0.01	-0.4	-0.02	-0.05	0.01
1_85	FALSE	TRUE	-0.4	-292.44	1	-102.8	-2.38	-20.6	FALSE	-0.05	-0.4	0	-0.08	0.02
2_284	FALSE	TRUE	-0.41	-224.48	1	-99.06	-2.5	-13.34	FALSE	-0.24	-0.41	0.01	-0.07	0
2_109	FALSE	TRUE	-0.41	-34.97	1	-13.94	-3.49	-5.26	FALSE	-0.1	-0.41	0	-0.04	-0.02
1_276	FALSE	TRUE	-0.42	238.45	0	-16.05	-2.37	1.27	FALSE	0.08	-0.42	-0.05	-0.02	0
1_283	FALSE	TRUE	-0.42	-115.82	1	-125.83	-3.08	-14.16	FALSE	0	-0.42	-0.03	-0.04	0.01
1_98	FALSE	TRUE	-0.43	-445.46	1	-134.52	-4.89	-18.52	FALSE	0.01	-0.43	-0.04	-0.04	0.01
1_48	FALSE	TRUE	-0.44	-238	0	-95.67	-0.8	-10.22	FALSE	0.34	-0.44	-0.01	-0.05	0
1_275	FALSE	TRUE	-0.45	-383.73	1	-134.78	-1.75	-21.53	FALSE	-0.29	-0.45	0	-0.09	0.03
1_177	FALSE	TRUE	-0.47	-621.13	1	-214.23	-5.4	-21.93	FALSE	-0.01	-0.47	-0.02	-0.04	0
2_103	FALSE	TRUE	-0.48	-17.99	1	70.72	0.62	-4.89	FALSE	0.03	-0.48	0	-0.06	-0.01
1_50	FALSE	TRUE	-0.49	-340.84	1	-52.56	-1.08	-9.09	FALSE	-0.47	-0.49	0	-0.06	-0.01
2_166	FALSE	TRUE	-0.5	302.04	1	-1.59	21.81	5.03	FALSE	-0.64	-0.5	-0.02	-0.02	-0.03
1_361	FALSE	TRUE	-0.5	643.91	0	20.41	6.43	8.51	FALSE	0.2	-0.5	-0.06	0.02	-0.03
2_13	FALSE	TRUE	-0.5	454.96	1	171.68	-1.07	5.82	FALSE	0.02	-0.5	-0.02	-0.07	-0.02
1_296	FALSE	TRUE	-0.51	-452.19	0	-107.56	-5.05	-14.46	FALSE	-0.09	-0.51	-0.02	-0.05	0
2_289	FALSE	TRUE	-0.51	41.25	1	-6.88	-1.33	-11.33	FALSE	0.03	-0.51	-0.02	-0.05	-0.01
2_151	FALSE	TRUE	-0.51	112.58	1	36.61	-0.45	-8.07	FALSE	0.04	-0.51	-0.02	-0.03	-0.02
1_28	FALSE	TRUE	-0.52	15.74	1	-24.88	0.38	-0.38	FALSE	0	-0.52	0.01	-0.08	0
2_40	FALSE	TRUE	-0.52	518.03	1	235.76	2.52	2.79	FALSE	0.02	-0.52	-0.02	-0.06	0
1_187	FALSE	TRUE	-0.53	-85.85	0.6	-37.47	-0.87	22.13	FALSE	0.08	-0.53	-0.01	-0.04	-0.02
2_186	FALSE	TRUE	-0.53	44.26	0.01	9.83	-1.86	-17.69	FALSE	-0.09	-0.53	-0.04	-0.04	0
2_36	FALSE	TRUE	-0.54	7.78	1	52.66	-2.26	-19.72	FALSE	-0.2	-0.54	0.01	-0.09	-0.01
1_200	FALSE	TRUE	-0.55	-120.76	1	-109.57	0.9	-20	FALSE	-0.06	-0.55	0	-0.1	0.02
1_117	FALSE	TRUE	-0.57	-531.06	1	-219.08	2.73	-22.3	FALSE	-0.18	-0.57	-0.02	-0.09	0.01
1_305	FALSE	TRUE	-0.58	-63.59	1	-43.99	13.29	10.28	FALSE	-0.06	-0.58	-0.02	-0.07	0
1_118	FALSE	TRUE	-0.58	-618.15	1	-160.62	-5.49	-15.65	FALSE	0.03	-0.58	-0.02	-0.08	0.01
1_214	FALSE	TRUE	-0.58	-355.91	1	-64.92	-5.64	-16.84	FALSE	0.1	-0.58	0	-0.1	0.01
2_74	FALSE	TRUE	-0.58	53.79	1	-17.65	-1.99	-16.19	FALSE	-0.24	-0.58	0	-0.07	-0.01
1_293	FALSE	TRUE	-0.59	-567.94	1	-215.09	12.4	-22.14	FALSE	-0.13	-0.59	-0.02	-0.08	0.02
1_25	FALSE	TRUE	-0.59	-541.11	1	-200.62	-6.11	-16.32	FALSE	0.17	-0.59	-0.01	-0.09	0.01
2_133	FALSE	TRUE	-0.6	11.63	1	-44.02	1.55	-17.03	FALSE	-0.24	-0.6	0	-0.11	0.02
1_89	FALSE	TRUE	-0.6	-619.66	1	-174.59	4.31	-22.68	FALSE	-0.18	-0.6	-0.01	-0.07	0
1_193	FALSE	TRUE	-0.6	-512.36	0.01	-139.68	-4.52	-15.89	FALSE	0.12	-0.6	-0.01	-0.09	0.02
1_232	FALSE	TRUE	-0.61	-565.9	1	-182.69	-5.45	-20.57	FALSE	0.04	-0.61	0	-0.11	0.02
1_354	FALSE	TRUE	-0.62	-126.66	1	-103.03	2.56	6.73	FALSE	-0.13	-0.62	-0.03	-0.06	0
2_363	FALSE	TRUE	-0.63	40.31	1	28.74	-1.06	-1.2	FALSE	0	-0.63	-0.01	-0.1	0.02
1_111	FALSE	TRUE	-0.63	-589.56	1	-200.54	-5.59	-18.2	FALSE	0.1	-0.63	0	-0.11	0.02
1_330	FALSE	TRUE	-0.64	-378.04	0	-143.1	2.97	-20.08	FALSE	-0.08	-0.64	-0.05	-0.04	0
2_43	FALSE	TRUE	-0.64	305.99	1	126.37	2.07	-4.51	FALSE	-0.4	-0.64	0	-0.1	0
1_122	FALSE	TRUE	-0.65	19.92	1	-12.16	-1.92	-6.67	FALSE	-0.19	-0.65	-0.03	-0.07	0.01
1_94	FALSE	TRUE	-0.65	-603.47	1	-232.93	-3.4	-22.54	FALSE	-0.1	-0.65	-0.01	-0.08	0
1_21	FALSE	TRUE	-0.67	-287.47	0.03	-176.26	6.29	-21.09	FALSE	-0.2	-0.67	-0.06	-0.06	0.02
1_23	FALSE	TRUE	-0.67	-620.43	1	-209.82	4.29	-22.45	FALSE	-0.13	-0.67	-0.02	-0.06	-0.01
1_197	FALSE	TRUE	-0.67	-628.65	1	-197.32	-3.31	-21.66	FALSE	-0.1	-0.67	-0.02	-0.09	0.02
1_260	FALSE	TRUE	-0.68	2108.04	0	661.93	-1.62	116.36	FALSE	0.33	-0.68	-0.05	-0.05	-0.01
1_194	FALSE	TRUE	-0.68	-551.56	1	-169.13	-4.65	-19.59	FALSE	0.12	-0.68	-0.01	-0.1	0.02
1_54	FALSE	TRUE	-0.68	-402	1	-150.51	-0.75	-14.95	FALSE	-0.14	-0.68	-0.02	-0.08	0.01
1_91	FALSE	TRUE	-0.68	333.95	0.01	42.85	1.37	6.45	FALSE	-0.17	-0.68	-0.02	-0.07	0
1_210	FALSE	TRUE	-0.69	112.34	1	10.55	-4.13	-9.86	FALSE	0.23	-0.69	-0.03	-0.09	0.02
1_329	FALSE	TRUE	-0.7	139.32	0	17.94	-2.42	13.7	FALSE	0.22	-0.7	-0.04	-0.07	0.01
1_331	FALSE	TRUE	-0.71	-311.66	0	-116.52	-4.67	-17.62	FALSE	-0.02	-0.71	-0.05	-0.06	0
1_168	FALSE	TRUE	-0.72	-512.41	1	-117.68	-4.99	-9.1	FALSE	0.08	-0.72	-0.02	-0.11	0.02
1_69	FALSE	TRUE	-0.72	359.09	1	44.28	1.95	-15.73	FALSE	0.02	-0.72	-0.04	-0.06	0
1_154	FALSE	TRUE	-0.73	-528.5	1	-167	-4.47	-4.56	FALSE	0.14	-0.73	-0.01	-0.11	0.01
1_204	FALSE	TRUE	-0.74	-669.15	1	-236.26	-3.74	-22.66	FALSE	-0.01	-0.74	-0.02	-0.1	0.01
2_20	FALSE	TRUE	-0.74	-275.33	1	-111.7	0.06	-10.85	FALSE	-0.17	-0.74	-0.02	-0.09	0
1_362	FALSE	TRUE	-0.75	-301.72	0.91	-142.73	-3.19	-18.55	FALSE	0.26	-0.75	-0.02	-0.1	0
1_61	FALSE	TRUE	-0.75	-140.39	1	-7.87	6.69	5.67	FALSE	0.06	-0.75	0.01	-0.12	0
1_259	FALSE	TRUE	-0.77	716.02	0	227.88	-2.24	76.96	FALSE	0.27	-0.77	-0.03	-0.08	-0.01
2_80	FALSE	TRUE	-0.78	506.37	0	176.31	5.59	35.03	FALSE	0.17	-0.78	-0.03	-0.06	-0.02
2_14	FALSE	TRUE	-0.79	371.09	0.67	36.38	-1.82	-7.43	FALSE	0.07	-0.79	0	-0.08	-0.04
1_365	FALSE	TRUE	-0.8	697.7	0	274.53	3.64	50.19	FALSE	0.24	-0.8	-0.06	-0.04	-0.02
1_121	FALSE	TRUE	-0.81	-367.06	0	-169.76	9	-21.83	FALSE	0.09	-0.81	-0.05	-0.07	0.01
1_253	FALSE	TRUE	-0.91	-123.23	1	-54.31	-2.6	-16.25	FALSE	-0.05	-0.91	-0.04	-0.09	-0.01
2_353	FALSE	TRUE	-0.92	1303.23	0	451.23	7.48	41.26	FALSE	0.24	-0.92	-0.03	-0.08	-0.02
1_319	FALSE	TRUE	-0.95	47.35	0.97	55.76	-2.17	-17.32	FALSE	-0.17	-0.95	-0.04	-0.11	0
1_218	FALSE	TRUE	-1.02	896.64	0	176.54	-1.62	48.26	FALSE	0.47	-1.02	-0.05	-0.1	0
1_334	FALSE	TRUE	-1.06	367.53	1	-28.92	-1.55	3.13	FALSE	-0.01	-1.06	-0.04	-0.14	0.02
1_53	FALSE	TRUE	-1.07	-176.75	0	-111.88	-5.04	-15.29	FALSE	0.25	-1.07	-0.03	-0.13	0.01
1_182	FALSE	TRUE	-1.09	-58.64	0	49.28	-2	18.56	FALSE	0.17	-1.09	-0.01	-0.15	0
1_241	FALSE	TRUE	-1.2	202.84	0	73.42	-2.31	54.23	FALSE	0.17	-1.2	-0.04	-0.13	0
1_307	FALSE	TRUE	-1.23	-24.2	0.02	22.6	-2.68	1.27	FALSE	-0.05	-1.23	-0.05	-0.12	-0.01
1_357	FALSE	TRUE	-1.35	-8.91	0	0.14	-4.55	10.9	FALSE	0.23	-1.35	-0.04	-0.17	0.01
2_267	FALSE	TRUE	-1.48	601.56	1	142.17	4.02	-14.32	FALSE	0.28	-1.48	-0.05	-0.17	-0.01
